# Supplementary material for: Restored TDCA and valine levels imitate the effects of bariatric surgery
Source: eLife. 2021 Jun 22;10:e62928. doi: 10.7554/eLife.62928 (PMC8257250; doi:10.7554/eLife.62928)
Supplement: Figure 1—source data 1. [file elife-62928-fig1-data1.xlsx]

## Sheet: Tabelle1
Figure 1
A)	Days	obese control					lean control					Sgx					Sham
	0	40.9	39.7	40.15	41.04	39.3	27.6	29.15	27.3	28.8	29	41.6	42	41.5	41.1	40.5	42.3	41.5	41.3	40.9	41.2
	1	41.08	39.53	40.2	40.45	39.09	27.65	29.57	28.03	30.01	29.5	39.1	39.5	39.1	39.8	37.6	39.9	40.6	40	39.5	39.7
	2	40.55	39.74	39.88	40.82	38.89	27.59	29.63	27.52	29.12	29.2	37.4	38.4	37.5	37.8	36.8	39.5	39.2	39.3	38.8	39.2
	3	40.29	38.98	40.45	40.3	38.33	27.11	29.71	27.59	29.79	29.21	35.4	36.2	35.2	35.7	35.6	39.2	39	38.8	38.5	38.7
	4	39.98	38.64	40.39	40.74	37.4	26.76	29.61	27	29.63	28.82	35	35.6	35.5	35.4	35.2	39.4	39.2	38.7	38.8	39.1
	5	40.62	39.26	39.68	41.11	38.14	26.8	30.03	27.5	29.3	28.32	35.2	34.8	35.6	36.1	35.1	39.5	39.1	39.2	39.4	39.2
	6	40.61	39.44	39.9	41.36	38.03	27.11	29.66	27.29	29.22	28.22	35.7	35	35.8	35.8	35.6	40.1	39.9	39.6	40	40.2
	7	41.08	39.32	39.63	41.42	39.01	27.22	30.04	27.25	29.39	28.41	35.4	34.4	35.2	35.4	35.3	40.2	39.7	39.5	39.8	40.3
	8	41.89	38.64	39.47	41.01	39.55	27.46	27.28	27.63	29.12	28.04	35	34.5	34.9	35.1	34.8	40	39.9	39.8	40.1	40.6
	9	42.31	38.77	40.01	40.87	38.85	27.6	30.27	27.67	29.65	27.57	35.3	34.9	35.5	35.4	35.4	40.5	40.4	40.2	40.6	40.4
	10	42.21	38.96	40.35	41.28	39.28	27.53	29.39	27.39	28.34	27.98	35.3	35.1	35.2	35.3	35.2	40.8	40.3	40.8	40.6	40.7
	11	41.93	39.31	39.92	40.71	39.31	28.38	29.96	27.51	29.6	28.39	35.8	35.5	35.9	36	35.8	40.9	40.9	40.8	41	40.5
	12	41.3	39.09	40.29	41.44	39	27.33	29.55	27.68	29.25	28.72	36.1	36	36.5	36.2	36.4	41.2	40.8	40.6	40.8	41.3
	13	41.22	39.4	40.35	40.87	38.76	27.11	30.14	27.4	29.56	29.29	36.5	36.7	37	36.4	36.8	41	40.9	40.4	40.5	41.1
	14	41.29	39.62	40.47	41.32	39.17	27.34	30.01	27.95	29.55	29.17	36.4	36.5	37.1	36	37.2	41.3	41.2	40.5	40.4	41.5
B)
	SGx		Sham
	Day 7	Day 14	Day 7	Day 14
	-26.7943	-35.6459	-13.7339	-5.15021
	-27.8802	-41.0138	-9.5339	-4.66102
	-26.9316	-35.7616	-9.11215	-1.16822
	-25.9101	-44.1114
	-18.6147	-20.3463
