# Supplementary material for: Restored TDCA and valine levels imitate the effects of bariatric surgery
Source: eLife. 2021 Jun 22;10:e62928. doi: 10.7554/eLife.62928 (PMC8257250; doi:10.7554/eLife.62928)
Supplement: Figure 2—source data 1. [file elife-62928-fig2-data1.xlsx]

## Sheet: Tabelle1
A, B and C)
	111714QmquanteMets MetaboAnalyst II
		Control	Control	Control	Control	Control	Control	Obese	Obese	Obese	Obese	Obese	Obese	SGx	SGx	SGx	SGx	SGx	SGx
	glyoxylate	107883.1138	105405.7607	39233.29126	130391.4049	76093.52241	35745.75443	77604.73798	71467.4102	52355.7961	32821.17531	115681.1796	121838.9098	71575.52962	40000.98937	82016.32768	29857.99194	5408.724774	66875.59036
	glycolate	312347.3139	498117.0304	285937.2573	372024.128	427026.6036	253093.7556	421885.7842	331412.3761	789484.443	430826.7521	552333.5539	385730.1533	346362.1335	289693.7635	261904.2796	245824.7401	437442.5323	288813.5005
	pyruvate	47268.78075	46039.22364	30376.32366	47047.00096	86025.69738	44891.83035	102967.6153	179413.4813	49111.84574	238481.4157	145862.5089	51546.89444	209902.8615	167474.3349	118707.1458	132895.571	169199.714	60834.9886
	lactate	184910962.1	146223728.5	157227919.2	176642393.6	190638773	211045838.2	175230885.6	163877554.7	126585172	175345371.9	156979308.2	175199804.5	203131562.1	193266697.5	170062142.3	208100234.9	153074999.6	176639100.7
	2-oxobutanoate	556049.0359	489383.5155	622049.8618	794706.4784	715994.2264	520100.3505	892824.6544	667273.746	1922778.477	1107009.04	1360016.511	757352.1475	402966.5561	875661.9777	1168470.985	975537.508	1187251.136	545066.4152
	acetoacetate	713758.011	759789.0397	634167.5673	722000.5475	1010591.476	501883.3943	844629.5493	745485.4095	2098223.56	1456235.488	1618216.736	889420.3139	589958.959	586116.5476	572762.2656	856158.3037	1104824.219	521466.6329
	glycerate	2750868.126	2975728.327	3178187.521	2095437.973	3660935.335	3464938.092	2231125.542	2649288.964	3648626.809	3651942.187	3419728.708	4380246.482	1664745.803	3005030.492	3985050.187	4870189.257	4473582.288	2871457.222
	uracil	138821.6571	37613.00992	158783.2201	155479.9004	144550.0188	102847.9936	107191.0385	69594.90455	93961.68233	61156.60573	92756.58514	165719.6238	39481.14775	54411.43161	115946.6128	NA	45976.18576	64931.68547
	fumarate	3582187.239	2174996.704	3801318.291	3285586.303	4402066.535	4107220.578	3550799.884	4270877.766	2222586.893	6311104.371	4587858.498	4547199.454	3876099.697	2844413.432	3313065.327	12992278.49	2227852.041	4741220.541
	Maleic acid	3469923.272	1976675.994	3826419.543	3467010.837	4351103.201	3806008.647	3476059.46	3916798.377	2230137.608	6783403.738	4159922.831	4390070.542	4079167.515	2914520.3	3214302.796	12611772.39	2435747.309	4734502.32
	2-keto-isovalerate	3611735.049	2069518.124	3761300.304	3187265.738	4249795.351	3897958.049	3535509.667	3861767.91	2184080.552	6098664.902	4355933.862	4353564.163	4057643.954	2939778.725	3137870.304	12269244.89	2114897.437	4759874.684
	Guanidoacetic acid	6342417.703	11036841.83	133671.2304	16652816.92	13970051.72	10658060.19	20373536.87	21678748.09	20973198.46	15902106.55	23667954.2	13150736.7	5719315.4	12111943.71	6812903.3	9362052.986	10994355.31	10824325.85
	succinate	32677601.51	19152915.67	18629662.4	23571311.45	46101461.36	29886142	55507021.14	37958303.81	31739428.61	59883292.11	44748511.21	34401929.22	49993379.51	28362971	46966120.17	67719922.05	37134782.44	47471300.05
	Methylmalonic acid	37728743.27	22624679.15	21987127.71	27676584.19	52031598.03	35261813.87	62445831.71	44470859.23	36190648.42	65881762.19	51164519.17	40773057.41	54701977.35	32819276.67	53575815.85	76093435.14	43849391.39	52569424.39
	3-S-methylthiopropionate	11289.84808	192290.8224	184706.8217	257120.6005	13159.74306	16427.21123	744066.2881	512223.0968	693944.0624	959081.0408	1434493.43	664018.8963	359827.3305	488541.6912	387796.4683	314228.1478	355898.4321	383910.8161
	nicotinate	1539067.686	929218.7887	1177079.016	732135.1037	356962.236	368576.6729	990352.7665	467309.7257	1244765.533	306685.7899	1098978.667	228252.169	582202.9738	292997.0153	231081.9303	728943.1472	511117.3125	506137.0194
	taurine	72217092.3	69197348.74	73566367.61	71130064.58	75829495.61	58169428.84	69721385.99	63217967.78	63055099.65	69061043.3	66664998.98	82119364.9	73733221.73	70975049.39	68455457.03	56049435.18	63554462.12	73840026.37
	Pyroglutamic acid	1956503.979	1929554.536	993711.7661	1656666.15	1740276.32	5081922.418	1319832.819	3564857.012	2580867.523	2180372.497	2003894.212	1326410.908	1953881.6	6920630.958	3982090.738	5593627.416	1744978.932	1763277.465
	Citraconic acid	4463301.377	5849644.94	3696331.412	6244101.317	6183764.57	5624416.892	5478233.337	5997322.927	6670404.643	6337069.316	9240050.097	5281090.142	4549907.06	2254917.25	4241389.77	11358850.75	3713031.513	5016442.192
	2-ketohaxanoic acid	126032.9172	139856.5262	72435.42116	160270.1311	117552.4092	173274.2552	155524.0357	125265.8369	278412.7252	180512.0068	256178.4055	134372.273	105739.358	116307.551	111418.225	279598.0125	154503.8706	173673.2113
	N-Acetyl-L-alanine	23134496.22	30958736.74	22015295.55	18757885.18	24852761.96	27750308.9	21922864.15	43062788.36	25747950.99	31654509.01	28579386.88	19482379.07	21395969.19	28790740.26	31986371.71	53668746.55	20738765.73	32644023.01
	oxaloacetate	2423730.531	3013854.986	2075731.122	2941889.938	4420443.031	2653337.439	3177932.191	2964723.728	2878913.229	3901654.204	3998172.845	1839273.793	2518670.91	2000901.34	2946491.157	7353773.833	3160668.357	3501291.591
	Hydroxyisocaproic acid	1206338.711	982737.8585	1016189.5	1146022.226	1124075.712	2622767.021	1282276.781	2519465.183	1621024.796	1753910.832	1809818.016	2240045.468	2501788.612	1031232.383	3051485.234	1400843.793	2481226.421	2244390.419
	malate	20617814.41	12405480.58	22131107.94	20375448.85	24942156.81	24024973.59	22897129.71	22970676.79	11924519.86	34692641	24833285.48	23990380.78	23744466.69	17174587.69	19806255.43	57069421.3	13063691.12	28884409.9
	hypoxanthine	3087203.795	272378.9491	135789.7181	124860.6409	43119.47505	171190.6794	5192270.847	102430.9871	29852.20868	6896269.322	568934.1805	3117662.89	2779642.206	697107.7555	7192070.776	5568703.313	147410.2272	2810102.857
	anthranilate	361513.9688	157605.0682	316624.2356	411620.6838	439394.409	208857.3294	335756.219	182563.3778	405052.9853	348534.8916	283930.1774	367234.541	694352.1999	202214.337	254721.0601	262418.4574	259606.721	256943.7673
	p-aminobenzoate	329376.857	369592.9572	404260.8421	484882.8222	414587.8659	307870.234	261963.7133	118801.6855	366743.157	430606.9183	347360.598	390097.3923	499696.8486	173128.564	316132.0215	205631.1562	282106.8154	217480.1841
	p-hydroxybenzoate	4514962.019	11928592.55	5711260.7	5683094.603	4675591.371	2149348.016	2337175.675	1826618.032	4762773.335	1954448.153	3371752.532	1480496.036	1848569.966	2723387.718	694709.288	867106.3989	1365721.113	3381145.856
	acetylphosphate	204189.9229	160648.0601	192880.6721	153021.6475	214938.0422	105500.0704	173957.194	125245.323	102152.2806	243018.469	155229.8582	235534.0618	249076.2101	131337.7027	229209.083	411773.5741	156156.617	228565.6832
	Carbamoyl phosphate	7889982.038	8256592.625	9920635.083	6874505.11	11867860.53	7561120.822	6920191.639	7564383.038	6289591.638	8548312.287	6297848.799	15338665.21	10378115.15	8805011.9	11391381.31	23253733.03	4257566.427	9278044.829
	a-ketoglutarate	5865039.342	6106372.979	5256224.295	7536697.8	7292107.926	3774839.142	8732136.444	6991725.078	9922648.685	7870015.053	9759022.66	7192134.554	7340212.151	7109404.545	7559775.28	12826764.48	6626908.097	6413908.678
	Phenylpropiolic acid	3233769.648	2395711.105	3765481.271	3174101.151	3060037.969	3562952.184	3127866.489	5553302.223	4433609.062	5852728.35	5939329.077	4137163.344	2124906.524	2679514.332	3315296.111	6207993.289	2799390.08	3612814.078
	2-oxo-4-methylthiobutanoate	38680.28864	66086.55455	50006.0041	53896.02405	39548.35673	30540.07144	17782.54787	88868.89735	44413.6067	35733.20916	39436.19086	31532.58682	45416.44402	17087.17736	38346.20233	47209.71906	31752.53353	25163.8416
	2-Hydroxy-2-methylbutanedioic acid	1449827.569	2226633.924	1781856.985	2028642.873	2463154.406	2102821.916	1734576.179	2510077.027	4142582.954	3083167.475	4303115.684	2252220.145	1411167.132	1715934.707	1662359.084	4075779.514	1943289.139	2073734.324
	3-methylphenylacetic acid	36772.226	36157.50249	46395.66405	30848.0778	50523.22948	36097.49336	47056.97381	74382.82921	30322.47434	59543.18633	46603.51921	28673.66045	51250.8063	11354.66386	25131.87032	104026.9129	36934.91137	52047.74476
	xanthine	26751799.29	2738486.306	2108177.127	1175383.463	697648.67	3094433.808	37173726.82	770634.5726	482921.0179	31103707.74	6302523.226	22084963.89	28268115.73	8894272.084	31847455.39	30285302.2	1053267.451	23211634.26
	Hydroxyphenylacetic acid	78391.65955	240431.9988	126275.0487	212318.3363	155669.5764	101533.1441	252051.1935	156344.8459	219836.8975	133959.2582	157631.7977	304620.3269	176638.0214	134589.0485	162969.2105	95498.75469	274323.9866	127273.8979
	2,3-dihydroxybenzoic acid	117563.27	397494.6762	197409.1163	203351.7339	237890.2963	176542.7758	229754.7443	227034.4716	121840.28	116563.6723	189612.45	111081.2968	277250.1136	217894.9745	276259.7549	410423.7451	538659.9778	196969.2445
	orotate	658167.7586	780617.3968	1154018.612	745728.47	921341.6886	712342.6689	766879.1472	834577.0902	789410.5476	1136357.371	1437221.305	673430.1139	537876.422	643308.3765	685344.877	2076862.552	430594.4083	821695.1929
	dihydroorotate	1258751.585	1983751.451	1828719.934	1632947.178	1321589.241	1542974.576	1562257.251	1709617.007	1847653.557	1292899.589	1688162.148	1341745.583	1525454.091	2313057.128	1289797.325	1527784.618	1936579.788	2032297.401
	allantoin	11665976.91	9210780.203	10592548.23	6463637.309	7453724.167	7950848.117	4851103.22	5658818.31	4703104.793	6989070.595	5560430.227	9557903.676	5049179.826	3285254.103	5009226.869	11247037.6	4267878.874	9446260.556
	Aminoadipic acid	1112259.375	1239423.938	1164791.725	972529.1974	670062.3655	1135001.56	1076189.654	1318578.949	1175635.874	861374.7924	1489936.134	1182169.231	1103458.646	1538242.798	1022403.407	1719854.056	842324.4121	1614770.186
	Indole-3-carboxylic acid	1422490.493	1300719.635	1365252.69	1036154.811	760578.7124	1183159.965	1120475.964	1232451.819	1262738.105	1016014.416	1656722.263	1409154.259	1201969.83	1367044.226	1063837.499	1986431.814	797935.0358	1877410.899
	phenylpyruvate	52244.47333	38231.59117	6558.64626	21221.97069	27435.15941	35434.49781	21539.54486	70285.43243	45842.44634	20063.01239	57697.45274	36082.56411	26498.99486	52812.75639	18868.51399	55294.37744	57207.60853	37716.28722
	Atrolactic acid	582607.5809	1020573.544	305497.0689	724145.0393	1006406.649	445287.9981	228450.3504	29300.08008	1438654.576	439089.1133	865228.9129	96721.92623	1424131.008	841578.9192	20196.04254	NA	NA	2375474.755
	Phenyllactic acid	931829.5863	4892007.642	903641.9425	923951.7191	1767786.358	1620796.191	367056.4463	2217866.801	1069046.303	1269511.397	3250642.18	87469.01318	2505103.538	813512.9935	3855.396516	NA	NA	16216069.51
	quinolinate	165991.9689	205512.9787	189908.0819	248900.5744	168449.4733	187771.022	218855.3658	95766.87114	621176.4086	192232.7591	454223.5282	266673.4	119163.7378	178266.2664	158494.8592	127836.7919	119702.6166	132247.0854
	phosphoenolpyruvate	182663.4698	127162.1577	263553.4495	233330.6927	190837.0894	148800.0245	438263.474	222662.934	144201.4951	220142.3085	185863.6411	315921.9759	199805.1056	75151.40596	193384.3885	652348.7899	119212.8877	217788.8407
	Uric acid	23455646.93	11432209.48	7308480.706	14937207.86	25568418.04	10102712.74	22902953.63	15698990.55	12842464.74	18995173.38	16117463.28	12361342.62	22077469.9	16461871.78	22903897.4	18800832.4	17675606.05	25399029.44
	dihydroxy-acetone-phosphate	191582.4302	137814.1879	342736.5692	203442.2046	537055.5846	91831.29149	489879.7679	102828.7116	97664.97805	141721.8286	139182.9957	758625.5634	206157.4883	107350.9905	156925.2594	390907.9434	88409.24525	255014.7368
	D-glyceraldehdye-3-phosphate	192575.5092	247110.3349	275799.1835	193926.8656	504059.5666	79820.53488	474647.2152	158844.2026	135080.1074	177539.1735	186250.4241	642435.5966	168646.958	114713.0992	103196.6971	250594.6148	125499.0937	237434.1097
	sn-glycerol-3-phosphate	9338283.193	7115721.008	7099475.889	7786435.044	11010393.42	8554154.892	10455316.16	7152536.7	5062028.969	10916325.69	6703033.964	9108425.507	9678938.341	6575831.313	10652580.45	19152460.93	5969487.674	10143825.4
	shikimate	123793844.7	135434841.2	195403550.7	83451152.79	145522744.7	111613383.2	7866973.763	50894504.07	42748643.71	12123822.85	12176828.99	15655792.88	1955946.071	10185764.59	1272877.115	367636416.2	2812874.02	6237184.884
	aconitate	3549263.487	4907178.498	6509321.549	6445074.099	3558881.282	3824101.717	4550972.439	4522254.684	4886772.586	4483600.385	7062867.682	4142738.922	3852476.842	3221896.362	3207160.049	6720925.219	4417396.596	4033320.467
	allantoate	551064.2824	1232352.907	561619.3362	667329.6468	1036277.76	729003.3628	390079.0189	523971.3308	278853.6505	291878.9828	370324.4307	305367.402	329900.3271	331459.601	493088.3934	1286068.524	364243.3456	535362.7861
	Ascorbic acid	1749470.589	2308587.856	1832232.949	2583851.592	1710370.623	4371897.288	1252491.419	9625705.193	1786140.353	2675049.154	794004.1116	2475927.911	1998993.969	5440704.149	1207200.959	2989144.753	1796340.505	940873.8546
	2-Isopropylmalic acid	481547.2694	1801094.577	627899.8861	786487.5077	497583.7128	440947.3823	334113.58	16596270.88	930357.6262	688635.8961	798952.2313	201098.4713	449877.1044	608987.8378	602693.6012	407210.4587	550248.0569	315416.4067
	N-carbamoyl-L-aspartate-nega	519836.8428	954839.7835	498373.5523	513803.7174	886290.5854	637963.3009	321944.6174	473068.7555	233793.7664	250559.6689	350916.6885	223058.1782	286793.3197	351359.1842	496635.0905	1233681.637	276419.351	555897.8456
	Pyrophosphate	2303968.913	3128160.149	1798075.694	3024982.809	1733421.798	1326540.933	1554933.941	1452542.109	792754.7692	2923499.504	2210227.574	1826762.203	2315324.053	2233872.86	3245439.429	2689059.905	1779108.962	2324500.289
	glucono-?-lactone	206519.4191	169867.3453	127410.4166	328368.858	182933.9035	209495.5904	156033.6296	191933.0444	112029.4183	192267.1677	163721.3206	239724.7978	134354.8562	177282.5986	123264.1194	225897.603	142201.6415	149755.543
	myo-inositol	41818061.16	35836450.47	27195513.62	39040793.07	40531135.49	29363935.54	41651867.89	21386948.72	25578395.62	31144112.83	28428063.12	47808822.26	40526004.89	23560185.76	22034102.88	22503545.93	34982734.58	29406054.65
	hydroxyphenylpyruvate	3326426.467	2728975.363	2197833.356	2601716.506	2832893.967	3739612.151	3167829.051	3321071.069	1903759.068	3117517.035	2645436.346	2922255.545	2911103.037	2814928.742	3329773.275	2128044.54	3294380.151	3009025.004
	homocysteic acid	124751.6848	134919.1234	96030.36791	179698.8692	101170.3849	92763.90587	105103.8736	132153.3319	66394.27139	72670.76314	99261.24521	97327.15683	101322.1816	127713.9171	103789.0139	119020.8133	93395.60189	98278.39092
	4-Pyridoxic acid	489004.4663	693400.5506	501394.7075	531076.1191	438489.3533	427519.2323	441349.1818	463198.3995	765092.6927	261185.6473	470008.0698	456972.9657	490302.5834	457130.9321	327353.8662	449595.9211	355071.2277	457685.9075
	3-phosphoglycerate	426363.7186	348351.3426	443780.5574	358321.1016	307047.7941	262361.1291	453766.7524	357865.9865	422089.8963	316623.2789	568141.6425	755657.2543	743247.162	186964.19	984438.1948	1653543.049	325081.3786	720179.3823
	Indoleacrylic acid	909859.2465	726433.372	1185519.651	676852.3025	621937.2327	656868.8772	627584.934	582063.7071	854091.1362	725010.3725	815678.5834	910559.691	613985.8588	477735.1714	419222.3281	648313.2764	517114.2831	636051.6227
	Kynurenic acid	1026216.724	1310704.576	821858.759	855791.2102	790908.8392	885406.3149	662558.401	1838925	978254.3053	805390.1376	572077.5607	553996.7479	623764.8825	824434.8995	832112.8659	1869218.052	610480.5374	941062.2891
	citrate-isocitrate	88500127.9	131353123.4	128376807.2	122076831.1	127805428.7	104176281.3	80591054.09	89880103.39	104825534.1	94878293.99	101689709.7	91149726.16	98745215.98	90641281.59	82148421.44	173946363.6	68753153.64	102054789.6
	isocitrate	457264.6802	550328.0705	712784.9444	627464.6418	547327.4631	443181.6681	454899.9798	545789.5942	552009.9768	469422.3667	581171.7698	442213.4383	311892.9222	365542.6254	426545.874	1409540.873	324171.5182	626082.1778
	citrate	64848817.04	67550605.16	83913836.28	63180563.11	64537147.9	61824482.26	55512233	62630850.34	62568845.05	68548914.66	73425593.02	61547197.87	50565221.26	48918689.36	47936197.9	115728820.9	40894973.56	56657229.91
	2-dehydro-D-gluconate	448458.9864	280271.7588	534613.9136	533239.0902	838896.4006	532778.8807	721182.0675	587484.6919	814485.09	NA	NA	1835107.482	342201.4824	1216347.43	1000684.513	2041763.323	1616208.653	370185.587
	D-gluconate	4123291.587	3381172.428	3689733.054	4695407.397	4268844.979	4545818.764	3396592.618	5015465.981	3045402.341	3655034.809	3734027.481	4738817.719	3790530.974	4102664.305	3837959.861	6544217.314	2945846.446	3956241.32
	D-erythrose-4-phosphate	224142.2137	148894.4105	239504.2852	204002.5747	258504.8251	144647.3755	283653.3754	147103.0106	93823.42651	225623.2987	148209.803	429635.349	186491.9391	186277.0589	198062.61	344720.8722	112963.0676	184375.8134
	Xanthurenic acid	NA	33818.46504	NA	NA	433189.5339	NA	NA	484676.9565	NA	527007.6834	NA	NA	NA	423047.1464	448459.5504	322337.4856	386542.9792	674627.6814
	lipoate	NA	NA	NA	NA	NA	NA	NA	NA	NA	NA	6292.215787	NA	NA	NA	5118.74047	NA	3146.71606	NA
	D-glucarate	140647.7769	182529.3475	155207.5514	173830.5655	168337.9454	131042.3101	157777.0664	101617.1316	109615.8025	109850.0044	139082.3321	52989.79386	165816.0533	108691.6495	117488.4082	135802.8057	96007.51921	111193.5654
	deoxyribose-phosphate	134217.025	113049.9541	181233.2793	171670.0631	209427.2698	109491.3794	119936.7999	109955.1677	106028.3712	141563.4948	156374.359	172219.7321	188340.4088	115487.6762	184203.3008	451812.7054	494127.0164	131774.4215
	pantothenate	1702883.125	1500682.807	1482545.888	1363304.868	1349473.382	1502500.416	1706364.869	1406150.456	3017268.179	2725278.601	2597156.795	3998890.273	1423525.178	2479002.876	1644934.536	5123216.933	1725060.493	2743984.921
	prephenate	NA	8914.991541	NA	NA	3667.369353	NA	4719.498152	NA	2627.254881	NA	NA	NA	NA	NA	NA	NA	NA	NA
	deoxyuridine	371162.9074	717888.068	566332.136	568961.1607	661145.1753	369165.2511	436296.2129	476997.9943	1029497.181	298339.6741	489991.9682	184580.659	458320.2841	520207.3186	427378.5425	1222907.21	1012057.774	385685.0696
	ribose-phosphate	4872116.855	3342898.76	3826521.512	3672239.005	3559032.369	2293207.421	4059123.663	1741725.247	2118289.582	2879998.939	3467772.086	6275032.298	8705800.43	2596113.306	5347440.221	10061276.17	2997728.98	7258962.054
	thymidine	23714.47053	28043.57865	14888.03917	56311.94832	37563.09661	24532.45021	28696.6085	13611.42376	8073.33634	25672.46895	37368.51145	11416.08289	45283.93037	25548.03359	16113.72369	15280.60266	29745.22453	27647.93803
	uridine	37345.66369	26776.04776	22505.23262	20183.22953	55271.55096	16109.27442	65754.79329	42973.02351	40733.28541	47462.14654	33299.38249	71634.21326	31740.66762	18679.33593	45570.82904	35600.10627	32868.48282	38867.63634
	deoxyinosine	20506.44287	28555.66668	31542.05423	19222.91555	28225.18183	22247.83042	50020.08918	32496.99993	20537.33426	77298.95927	40806.4815	19441.32927	16497.24252	16863.27554	25442.4976	104146.9911	32918.36225	27194.97168
	shikimate-3-phosphate	NA	NA	NA	NA	NA	NA	NA	NA	NA	NA	NA	NA	NA	NA	NA	NA	NA	NA
	D-glucono-?-lactone-6-phosphate	53270.25715	39529.18339	36927.72079	70843.26406	97779.96522	48279.11149	79298.37564	70335.71771	54641.00345	95566.75386	94712.09275	26113.5731	32758.34571	54504.76761	85159.43091	56936.95796	66102.17148	54638.03606
	hexose-phosphate	8209038.654	5923055.001	9073376.305	8118987.977	10233842.16	6561753.134	7733093.241	5352560.707	3038470.933	8571120.626	5640764.399	13861641.05	9800592.328	5575357.003	9623375.368	12552967.22	4062828.605	8783755.126
	glucose-1-phosphate	414573.0238	695248.1725	397785.7614	478346.7105	476628.6012	267559.5822	269122.1664	454930.4187	251035.8218	243632.4108	305424.9609	490362.7934	611961.8931	526928.8658	268819.3843	657243.3446	530565.8912	239009.1832
	glucose-6-phosphate	587773.0416	402107.4128	615995.9855	567214.2307	795367.5274	470663.3107	745561.9408	418696.4712	296758.7239	721684.1777	602119.8243	988894.4741	854580.2922	407364.6705	723667.8051	1194123.527	449286.3747	645699.5397
	fructose-6-phosphate	682892.1807	366774.3531	606309.6577	620570.6338	903251.416	434988.8811	675393.7816	541853.3221	246592.8959	703852.0234	400762.5599	1159488.253	830814.9525	418950.608	726026.5009	984341.9078	366138.1502	704754.7131
	1,3-diphopshateglycerate	17354.08265	85036.30235	74683.61689	44406.83945	69326.51437	46689.15238	121905.9381	119399.6896	75179.34932	36239.35909	41584.33918	97405.4342	107062.4174	41788.75009	70430.63307	138182.6492	37003.78099	76370.60616
	2,3-Diphosphoglyceric acid	448894.9201	260117.0681	138592.8216	336465.5944	457847.4953	160748.6402	311872.0122	233269.7638	135945.8967	341851.4972	213188.5926	176042.5336	556817.258	420846.7023	696110.6061	498684.7851	358376.6913	508395.052
	S-ribosyl-L-homocysteine-nega	13674.86161	5303.771299	9151.857924	24616.75598	11632.06508	4249.468689	12734.70092	18549.65242	14659.86762	12690.58427	17012.57342	24767.0391	16582.98412	4662.418979	15105.84722	14582.87011	11932.70327	20206.16595
	inosine	15448541.28	6843119.674	1974899.807	2342833.428	1856522.394	5858796.639	10998628.76	1092267.99	1735438.325	11607910.55	4483466.799	7936849.781	11186072.73	8021132.673	13913709.82	11762315.31	2756214.887	15067160.24
	6-phospho-D-gluconate	149892.6405	264272.9992	141859.2681	185537.3483	175666.2913	161577.7252	123032.553	153609.1393	197167.0841	156900.2695	256656.7769	61588.5199	42929.35548	169893.992	95959.27328	107397.5234	136150.5706	62481.78234
	xanthosine	2728713.665	278098.7042	295173.417	460397.1491	1656916.29	1767327.641	5777757.68	266375.5936	297029.6204	3120367.958	366796.8673	939201.3686	1324004.689	432765.5295	1720473.865	1089213.745	269240.112	1128542.651
	D-sedoheptulose-1-7-phosphate	1244168.63	638700.6681	756245.2338	785504.9463	1000624.753	691338.1109	2074870.43	1389323.726	749439.1166	2246279.884	1007273.457	1370296.737	1299764.476	623701.4007	1068913.08	2228883.14	401429.0017	1285771.997
	N-acetyl-glucosamine-1-phosphate	1471622.342	780517.6605	1702196.503	1078787.655	1187922.024	1639722.334	621908.8301	717640.1467	370794.9837	1435667.793	520741.6187	920634.6329	906426.53	1231244.376	894752.8807	1377906.377	458884.5656	1403887.007
	glutathione-nega	142688.4792	60775.02319	96030.83386	164988.4187	267726.0365	81211.60924	240980.7927	129818.3042	76431.9309	183101.3058	101011.1432	525863.2967	130601.5157	80833.52392	116749.552	165708.8694	42017.49519	154356.6587
	dUMP-nega	18933.63112	28333.97099	19414.11586	21972.32638	42580.96488	31984.01718	14156.94644	28319.16662	13945.73344	24723.48589	38711.82002	35674.73797	48777.84499	20642.69049	26740.19714	135395.5906	13503.20834	34131.88967
	Geranyl-PP	21984.79547	19408.99934	24536.68858	19951.62657	24031.07753	18352.49741	8902.479358	NA	5786.784835	18315.67747	9760.46022	8892.438464	21504.38556	10488.33841	12059.62138	59252.70046	18878.94925	24644.93108
	O8P-O1P	8088053.192	18582797	3162441.12	5215025.595	2551440.223	4496308.585	2756093.232	6696066.292	2243154.208	2972559.16	3825922.869	952731.2451	2574382.731	5629835.933	5888249.067	3006856.838	5485757.695	3295620.861
	dTMP-nega	124496.7878	107266.1494	109610.0502	78694.82336	129828.8434	99529.16027	133682.813	113640.3137	120045.7657	84489.85453	114478.3514	96082.8178	51319.7866	104156.7943	50608.0332	139244.6653	146030.5324	110035.1404
	cyclic-AMP	179389.003	175113.9881	91635.61028	192449.768	58232.12103	383331.3344	153150.8721	451484.7987	193652.3049	353922.6448	201260.4041	171597.9509	127910.1972	208727.6933	177760.6792	145732.1681	230723.1298	300468.9892
	fructose-1,6-bisphosphate	364141.8848	415216.7156	708813.2428	555715.539	466807.2384	371891.1249	442430.6101	199590.9762	636819.9354	318311.4541	403241.6406	457407.4188	313854.292	587265.9403	172798.8756	312481.0093	432097.7553	443222.0834
	trehalose-sucrose	1243473.512	270962.6823	577690.0794	303465.1719	677279.7444	600323.3362	2249354.45	1017148.608	228649.9736	1109951.916	321055.9444	924122.8874	689406.3288	282901.0193	875397.5565	590644.9215	931091.7479	457694.6661
	Cellobiose	303140.9462	71233.98798	123235.2434	61930.1795	112407.8231	80643.27372	601012.1786	269610.0566	24276.4338	164659.3875	73220.11021	225448.4134	156042.8863	31046.90314	277948.965	132551.8949	62733.56273	94979.23562
	orotidine-5-phosphate	22627.93835	39788.41121	14205.91287	23032.35475	23863.71174	25565.41379	7896.223733	22674.98758	37420.71417	25144.01409	31018.54247	19199.36	29194.53061	19324.53243	12344.08656	31994.25004	42554.04374	28678.85381
	SBP	214741.1356	272609.009	315447.2379	248019.0001	411317.68	173196.1847	262192.3454	238078.337	244076.542	380082.9591	246471.3523	209332.5738	160282.88	271002.8698	109778.4922	258524.5248	239171.6012	253842.6561
	trans, trans-farnesyl diphosphate	16183.61426	22023.48465	20339.4493	16217.2448	18880.50368	4992.694755	11267.74421	7397.654094	19397.9924	21495.10423	12583.5454	8374.598794	7303.936162	NA	11533.87607	7959.964284	15731.72717	13109.09656
	S-adenosyl-L-homocysteine-nega	1171876.31	459995.2056	458819.628	337458.3155	1917171.85	606463.9458	779582.1882	820340.1477	470693.6163	968529.4657	1067207.096	1062521.879	288129.06	127006.7273	604071.5194	3429379.864	218272.9558	600013.706
	dCDP-nega	NA	NA	NA	NA	NA	NA	NA	NA	NA	NA	3670.019434	NA	NA	NA	3667.279045	NA	NA	NA
	5-phosphoribosyl-1-pyrophosphate	33129.49164	52972.38709	38317.19616	51898.42976	44032.88322	35939.17547	25048.47521	24299.33383	39542.42612	26963.87026	30505.17873	41738.60045	41817.81627	32914.53049	39161.82461	98258.28643	61089.48908	77619.9167
	Deoxycholic acid	NA	NA	NA	NA	NA	NA	NA	NA	NA	NA	NA	NA	NA	NA	NA	NA	NA	NA
	OBP	158233.1216	260965.1828	192897.1419	264333.0218	252169.1602	127167.1234	265008.3965	164066.5002	204141.9314	214987.5363	277248.4576	109211.6751	154042.3905	182867.187	187538.8369	170733.3678	224966.7562	232753.78
	dTDP-nega	10879.16885	7938.644108	3146.455357	NA	NA	NA	3587.482265	NA	NA	4729.170303	4184.925075	NA	5226.648656	NA	NA	NA	6032.738365	NA
	CDP-nega	36359.38908	26274.90827	35056.40255	12507.14425	20579.25851	28121.62082	23619.98044	21716.91075	19684.45224	9617.078182	12529.96089	48982.19861	20650.22523	48511.45157	10379.73783	69682.73748	35334.79792	37279.24735
	UDP-nega	6247.125608	6630.759092	14707.74999	13113.41627	31989.74127	10981.38994	13171.7928	14576.54885	10488.54473	20974.76865	5737.425808	50867.77461	8980.370666	16173.6807	21455.45739	25720.04635	7339.973227	10566.85418
	Cholic acid	8377.910648	4193.898913	NA	NA	5500.425577	4195.631793	5239.620468	9437.029796	NA	NA	NA	7192.9201	6291.154512	NA	5769.023313	23146.5005	NA	3146.288196
	trehalose-6-Phosphate	237547.3844	77995.57939	193421.9046	188951.2421	305711.8042	114711.1739	292604.3381	117908.0743	140495.1962	240690.8873	104807.5628	146784.6137	199788.0212	149469.5373	192348.9877	163657.4562	104183.1621	153090.1438
	Thiamine pyrophosphate	NA	NA	5941.830563	5744.304788	NA	9065.420729	NA	6972.30244	9962.870588	5300.848014	6256.245252	NA	6293.864565	NA	13298.44788	9445.770956	NA	6227.698059
	adenosine 5-phosphosulfate	14139.02896	4772.368775	20985.55085	4741.875124	11012.69703	NA	43526.05766	6850.849146	12627.72102	9514.505105	6272.109766	14160.77856	4676.984625	3146.434059	3941.496431	3147.425564	NA	7864.003107
	ADP-nega	134074.1707	52974.13058	213978.1505	125846.3332	566969.6128	20976.31561	321432.4566	86273.91829	86256.42519	206063.0697	98146.89866	572757.3132	138987.2223	90701.75062	233382.8614	156831.2058	10488.48633	114840.8154
	dGDP-nega	133108.108	64920.55365	176510.0878	106718.4933	425118.8603	24646.77918	283073.5779	131605.0215	71593.07683	161676.4083	139340.8199	659424.4964	145947.2382	109054.3727	202415.5901	130027.9749	11536.10727	91741.53657
	IDP-nega	25697.69555	9963.156896	36707.45146	15209.47762	52551.69943	NA	50373.99255	10488.0578	17305.36815	29877.7117	15670.87254	74601.05415	23068.56961	11536.48212	36742.12917	12586.32635	NA	17801.59108
	GDP-nega	NA	NA	NA	NA	NA	NA	NA	NA	NA	NA	NA	NA	NA	NA	5768.787369	NA	NA	NA
	CDP-ethanolamine	12579.64305	25693.09825	25671.5532	11514.17802	34086.54098	NA	22550.05065	17818.86486	14706.15849	16265.89954	6292.939356	29887.82224	17253.99724	11559.58076	14697.71629	28841.44309	10006.2477	6292.706188
	FMN	NA	NA	NA	NA	NA	NA	NA	NA	NA	NA	NA	NA	NA	4200.375077	NA	NA	NA	7860.61622
	cholesteryl sulfate	26083318.19	9817896.712	12873650.45	13646250.85	10287481.38	8920972.415	21492031.2	9372966.675	14983830.01	24169267.73	17578988.13	51481952.89	13039868.33	15109398.82	6268690.86	2715113.451	4689644.042	12758000.84
	dCTP-nega	NA	NA	NA	7340.315508	NA	NA	NA	NA	NA	4190.037883	NA	5763.474363	3669.997291	NA	NA	NA	NA	NA
	dUTP-nega	2711.386387	NA	NA	NA	6294.53352	2639.710017	2622.366947	NA	4728.920718	NA	NA	NA	NA	NA	4194.946351	5739.27871	NA	5754.861386
	dTTP-nega	NA	4719.519598	4183.524664	NA	NA	5244.106885	NA	NA	NA	3145.579723	7862.654416	4700.812444	4719.457813	NA	3670.196416	5241.405186	4195.591993	6817.856412
	CTP-nega	116831.8553	204001.885	125935.9571	96485.53229	96003.25338	205294.8665	96074.18349	251831.5455	127943.932	170157.0077	113895.4318	113042.7846	108200.1649	231308.0175	154750.4752	242794.2195	94412.72936	141721.1618
	UTP-nega	3146.332101	13100.01843	NA	3689.641354	NA	NA	NA	NA	6426.222865	8916.29915	NA	8391.256421	NA	NA	NA	9423.643545	NA	NA
	CDP-choline	26745.58223	34610.81168	30939.85427	23072.96278	35135.13512	6816.286487	23598.3177	9438.87843	24684.83606	13109.07292	7856.660031	63972.77058	29359.45558	23594.62964	18878.57095	16254.94796	NA	7865.875003
	dATP-nega	NA	4194.060694	NA	NA	NA	NA	NA	NA	NA	NA	NA	NA	NA	3146.472828	NA	NA	NA	3146.170229
	Taurodeoxycholic acid	22007.57121	28806.30214	27308.26028	31087.95523	25744.74755	29111.46492	12881.62546	18283.35309	21930.01994	15696.1107	23016.10326	13303.68626	37583.72849	32939.69204	22365.78724	44125.6411	15835.67969	23412.97499
	ATP-nega	NA	NA	NA	10509.76143	16752.06841	NA	13601.21538	6816.675782	NA	3666.954564	7867.336535	35078.73628	4095.562681	NA	NA	NA	4195.472494	NA
	dGTP	NA	NA	9958.25831	7340.388323	10905.3712	NA	13110.22097	6810.821395	7340.17152	NA	6292.570989	14466.2357	12064.77991	NA	4722.066153	NA	NA	4248.349366
	GTP-nega	28315.52817	28373.98918	13107.73677	24118.0028	9964.790739	22377.93114	16265.02237	33558.42566	33038.31512	27267.81783	35160.2061	27040.5385	22053.99332	30320.22742	17918.02196	39849.52345	14682.59221	24645.6671
	UDP-D-glucose	18921.36719	7853.418214	41426.42027	67117.19986	44063.89472	NA	58187.86885	13127.62058	13109.07701	18354.04876	17299.5173	102781.761	30416.37302	17829.03617	43524.27361	52422.6512	11012.05105	29379.55394
	UDP-D-glucuronate	NA	NA	3104.137175	NA	7342.249613	NA	15238.6512	6816.602255	2606.856831	5243.434686	3146.169992	3083.068367	NA	NA	3668.156981	15246.18231	NA	NA
	ADP-D-glucose	25160.82762	9416.947028	41956.35002	17303.64885	40364.74787	NA	20969.92829	11012.12697	20975.01288	14710.54933	7883.686749	81804.87651	49820.43691	11012.29071	NA	7341.976606	NA	13633.75688
	guanosine 5-diphosphate,3-diphosphate	35660.37371	37757.34176	49292.77187	49819.51465	26226.99081	45097.23439	39006.86734	70790.53674	45095.49565	48243.83594	49292.34388	34083.15346	25748.40342	19842.7999	62401.08148	167264.6819	23603.92139	48244.23281
	UDP-N-acetyl-glucosamine	20468.60639	18876.45494	39328.60316	11537.82939	40910.09266	6816.695185	28842.76153	45039.82019	30938.52961	30415.63826	13634.95191	42475.95357	7867.224662	45623.62489	29890.55737	105380.8881	7345.934447	20451.70132
	glutathione disulfide-nega	4870341.895	874698.3971	1471097.298	4274917.344	6419723.48	2137668.942	8568107.518	3189709.758	1099275.532	7160310.349	2213329.022	18429918.51	3071275.932	1116919.598	4313908.241	5969593.068	351591.5972	4141232.651
	NAD+_nega	NA	NA	NA	30413.21316	NA	NA	5243.160789	NA	5768.930294	NA	NA	5243.559734	17303.37874	NA	NA	4719.309035	NA	8389.241284
	NADH-nega	NA	NA	NA	NA	NA	NA	NA	NA	NA	NA	NA	NA	NA	NA	NA	3146.25145	NA	NA
	dephospho-CoA-nega	17837.17295	18353.58141	15207.74542	17830.57588	24647.50557	66599.43923	32514.08232	67611.95125	14161.50241	73938.99573	27267.77962	21487.57734	14682.43388	30413.91273	45621.55074	67123.19067	6274.0718	22547.41405
	cyclic bis(3->5) dimeric GMP	NA	NA	NA	NA	NA	NA	NA	5243.241452	NA	NA	NA	NA	4719.621568	NA	NA	NA	NA	NA
	NADP+_nega	NA	NA	NA	5257.908445	NA	NA	NA	NA	NA	NA	NA	6815.231732	NA	NA	NA	NA	NA	NA
	NADPH-nega	NA	NA	NA	NA	3670.356547	NA	NA	NA	NA	NA	NA	NA	NA	NA	NA	NA	NA	NA
	coenzyme A-nega	NA	NA	NA	NA	NA	NA	NA	NA	NA	NA	NA	NA	NA	NA	NA	NA	NA	NA
	acetyl-CoA-nega	NA	NA	NA	NA	NA	NA	NA	NA	NA	NA	NA	NA	NA	NA	NA	NA	NA	NA
	propionyl-CoA-nega	NA	NA	NA	NA	NA	NA	NA	NA	NA	NA	NA	NA	NA	NA	NA	NA	NA	NA
	butyryl-CoA	NA	NA	NA	NA	NA	NA	6292.570743	NA	NA	NA	NA	NA	NA	NA	NA	NA	NA	NA
	acetoacetyl-CoA-nega	NA	NA	NA	NA	NA	NA	NA	NA	NA	NA	NA	NA	NA	NA	NA	4195.732224	NA	NA
	malonyl-CoA-nega	NA	NA	NA	NA	NA	NA	NA	NA	NA	NA	NA	NA	NA	NA	NA	NA	NA	7864.362543
	3-hydroxybutyryl-CoA	NA	NA	NA	NA	NA	NA	NA	NA	NA	NA	NA	NA	NA	NA	NA	NA	NA	NA
	succinyl-CoA-methylmalonyl-CoA-nega	NA	NA	NA	NA	NA	NA	NA	NA	NA	NA	NA	NA	NA	NA	NA	NA	NA	NA
	3-hydroxy-3-methylglutaryl-CoA-nega	NA	NA	NA	NA	NA	NA	NA	NA	NA	NA	NA	3670.055242	NA	NA	NA	NA	NA	NA
	2-hydroxygluterate	967838.1748	1289486.522	908227.0659	1074441.61	1426599.416	1122445.07	1128113.476	1652706.595	3043481.732	2307585.809	2495129.235	1313401.115	713519.6873	1026543.095	992472.3553	3097816.176	1174494.38	1210923.454
	2-deoxyglucose-6-phosphate	5878259.124	7023063.963	5609351.079	8354022.524	5852806.193	2685589.419	4615441.577	3333664.214	4123482.076	6033073.347	7160840.787	5694977.82	6209921.369	5086720.353	4583743.043	7362598.204	3635859.255	4903195.636
	4-phosphopantothenate	29938.9855	24644.91273	12584.70444	6816.54926	23053.05299	24644.91898	27072.05729	514944.422	16964.0369	22923.96331	30369.84784	17858.71017	17828.00324	32534.68224	922516.947	33550.52646	992159.5255	19907.37656
	Urea	14424379.05	21566656.23	10671109.34	12640241.77	14209883.08	11218309.66	9665119.258	17591313.78	8246833.554	11580589.21	13317592.93	4828013.802	9689154.331	11663585.86	16433500.67	22875074.52	11843194.36	11058678.57
	ethanolamine	1320472.746	2072850.631	1696391.865	2315085.081	3026451.417	1837554.682	2611926.871	NA	2319663.266	2590209.007	2770528.25	1712957.289	1825300.347	3075431.67	NA	240375.9124	NA	2144074.915
	Imidazole	889455.4448	324825.6271	672340.4286	NA	NA	459719.408	NA	14704.29855	439960.3283	376411.652	491857.0827	323541.5799	575231.8956	670845.0783	NA	NA	NA	541559.4721
	glycine	NA	NA	NA	NA	NA	NA	NA	NA	NA	NA	NA	NA	NA	NA	NA	NA	NA	NA
	alanine	11154616.86	12860083.38	9121500.712	11880542.08	12507935.05	13122072.62	14161160.66	19163360.51	8448695.773	14849187.58	12660634.84	8830018.749	13206214.12	15341131.85	16432339.34	26249491.37	11411415.42	15151690.12
	betaine aldehyde	513550.5215	574734.1848	456955.1673	545495.2741	525042.5293	692621.7813	517153.5882	496441.1301	441204.529	441574.8675	473945.6964	265826.0157	522928.4366	654198.7634	520565.4317	339288.5481	384395.8642	441575.432
	choline	1076754.705	618421.808	927804.0472	1416490.213	NA	1167864.421	NA	NA	859740.6462	NA	NA	1058604.435	1418172.985	NA	108568953.7	2192240.627	110049149.5	NA
	4-aminobutyrate	21505.62384	9576.040368	15757.27355	17264.29345	25651.33329	17310.1248	28684.01904	40798.80991	12013.07875	25092.7602	16759.53959	12050.79462	29886.32654	18454.10872	41667.97956	145173.9882	15073.30359	38197.79348
	dimethylglycine	6252707.087	8968686.321	6986718.142	7492916.696	9119744.832	7947215.85	6445387.475	22434199.26	14604204.29	11292090.06	10607506.07	6023399.181	9576386.042	9564345.924	27073740.58	17926148.06	30134219.08	13341214.26
	serine	5295863.779	5884121.897	6054660.29	5603703.703	5399551.314	4423413.652	7211432.584	5951986.592	6321227.713	5476147.29	6854149.169	5383714.535	5826376.959	6383386.659	6787966.828	4882720.247	8154086.835	6682635.971
	cytosine	267658.4474	281873.048	190171.4148	364826.4342	333379.4101	218365.211	360316.4065	371698.2436	330828.3236	317534.3286	330031.2972	224871.3056	293391.7241	292680.9127	313957.5263	619193.3202	401860.8042	283417.7456
	Creatinine	669137.5286	988108.3647	866624.4662	549757.1954	871159.5487	993117.3555	958723.4034	2495246.482	716306.8192	1743911.648	1614220.27	527792.1969	705747.7872	997684.118	1749161.865	2905627.738	592847.3218	1488622.583
	proline	25231500.61	32027659.64	22861773.52	24572425.84	23823181.3	22675645.67	33546843.13	35812096.88	38362022.73	27470609.02	34185286.44	21192746.43	28581401.51	31757847.41	30536323.77	63832557.09	32893345.08	30843229.26
	indole	1155248.192	828712.1082	969323.2156	894325.9709	931448.9464	1048200.541	1226238.876	624621.8375	1241614.445	1462551.388	1109088.016	506976.7974	749596.1744	597431.3552	533723.2624	161763.273	612422.0296	842403.6498
	betaine	51470668.72	57949069.5	50580618.09	52397586.85	53875370.34	67421311.64	52746567.6	51671319.46	58727779.13	59576681.56	53443823.53	55064186.91	60034707.09	63658807.04	58181309.44	70747690.92	59538293.55	60094864.3
	valine	2252244.936	2297516.914	1785086.652	2116701.198	2841016.754	1822270.045	1534963.405	1365867.78	1104897.987	1303575.753	1005961.067	884072.266	1762715.259	1256184.392	1886849.796	1979364.75	2104395.844	2106682.11
	threonine	6931714.646	7979099.292	6943768.427	7069677.661	7471637.987	4395313.294	9954386.524	7295369.251	14139934.33	6115169.35	11553686.02	7618983.833	8678574.721	9668823.149	8134305.665	5515838.096	8294088.13	7365860.824
	homoserine	24082.56019	17520.38507	27392.36818	24802.06444	20596.24991	16257.90932	22020.29414	29217.48722	37146.60918	14082.16546	36509.38228	16497.99083	22828.57734	24208.00141	29415.18735	35458.95788	32021.6684	25922.29552
	purine	349720.776	389321.8438	316941.531	326355.5642	403771.7496	366562.8618	284609.5948	162044.3977	295143.9229	277157.222	265566.3465	198633.0945	288831.5558	258616.0366	205675.8899	187619.8028	181195.3273	324341.0898
	cysteine	89243.44574	147266.3221	161186.1248	146726.1085	195795.8446	81335.26897	195078.0016	133407.9285	202074.266	100410.4595	226598.4397	25443.39104	101086.3095	154543.8489	56978.95465	146691.0837	237090.2924	84317.91255
	creatine	36043374.3	46070600.09	33034465.82	28172805.88	40351787.55	46306687.83	36170976.88	65716738.42	39018277.37	52038665.34	47788830.66	24537854.78	38720899.44	43622107.46	56861312.52	71909737.63	37095599.66	48360705.77
	nicotinamide	7946404.591	6353969.724	9631633.623	10168316.35	6271554.633	3932165.56	8309568.948	6432426.85	10783039.73	8385460.945	8843055.59	3919981.185	6335677.197	5222544.855	7681176.993	3709784.441	3078810.987	5861520.721
	Imidazoleacetic acid	396618.9871	324295.382	238846.3972	322220.477	300690.3351	634993.3022	449531.5424	598836.0369	276849.3824	428853.5886	338310.2389	276813.3106	522723.4981	462931.2551	725023.849	334902.0031	374252.2042	562504.8333
	thymine	44008.00973	29195.83482	27974.53526	47657.7413	29172.1096	33515.05259	33169.54521	24027.50153	23768.00209	40380.44035	35021.9146	38858.95881	38983.19967	50625.80835	26159.34199	16039.04983	51876.35794	48805.6642
	DL-Pipecolic acid	52427686.7	51350921.7	46141701.4	54310855.79	50107762.64	56936564.15	50890495.1	72803678.76	54408645.99	72574781.15	49086094.5	40600069.12	43081692.88	54793139.88	65709140.68	72331250.55	51594751.96	43592751.11
	N-Acetylputrescine	5765.041907	9629.988128	5913.734036	NA	10226.71263	16017.05488	3867.371199	8149.242262	7130.928811	7909.689917	3787.84771	NA	9116.184032	14408.21524	10377.32761	5708.48896	11767.43581	10917.68482
	hydroxyproline	2324635.764	3363102.597	2653390.499	2091584.307	1793755.245	2650880.282	3189895.537	2707315.54	4456305.17	2225351.516	2490177.865	1336268.834	1688125.604	2132135.96	2722148.461	3083262.731	3007920.281	1968301.706
	leucine-isoleucine	77887733.74	81278854.76	67500685.88	80955601.79	77917703.32	75060588.56	74444267.04	62617044.49	63921658.57	76763035.98	64156605.94	45476943.79	74594040.62	73113282.75	76956477.96	66031171.79	72999458.18	81900213.63
	ornithine	3550588.728	2311909.144	2486824.724	3880417.457	6575928.346	1516735.306	5820877.603	3103972.091	2318899.728	3408729.838	4725491.459	2546778.859	4056003.019	3107668.474	4110678.156	5904605.721	4702937.7	3337127.262
	asparagine	1656606.221	1884484.612	1473252.843	1615473.465	1917629.378	1235104.711	2296126.108	1719167.905	2087875.423	1396323.384	2237367.23	1616679.617	1824780.834	1912785.622	1716884.806	1982021.271	1969836.358	1807082.91
	aspartate	289386.5903	338397.9242	482474.8396	430460.4816	460321.9633	268129.3398	234813.0925	343857.3372	243300.7932	261175.6152	338334.1623	368005.7684	304963.7723	309484.9742	457967.9985	787612.9558	208235.4887	236166.7067
	adenine	1089658.601	963735.8607	1490197.972	1022748.426	1954844.799	586430.7865	1736489.275	1031439.561	909120.3693	1792091.998	1191562.297	1377679.721	1184450.248	842010.5333	1631398.328	1470317.728	861711.9257	968290.7482
	Methylcysteine	552864.284	602209.0399	608940.3264	555026.4129	631395.1316	512293.5451	601412.7644	578573.2975	602438.2123	777544.3747	742842.7315	482361.9816	652970.6394	436090.1107	819685.825	968077.3037	1019957.817	708612.343
	homocysteine	9478.838465	11156.5875	17930.01544	11969.08433	12518.57342	9406.690052	21673.01245	18471.08295	21043.22339	30360.51109	29013.04261	15644.76795	18014.79648	13258.8079	21321.70391	26101.31217	32955.39575	13325.61308
	methylnicotinamide	NA	8749.705702	5548.19524	5361.935065	NA	NA	NA	NA	NA	4712.545062	NA	NA	NA	NA	NA	NA	NA	NA
	histidinol	11007.61273	30414.49003	NA	16252.13406	31450.45174	18874.43671	17840.66942	19930.80394	39890.16069	22513.18361	24642.41389	12052.39359	20970.54367	10992.90788	12054.63042	43794.08944	23585.18516	29361.02782
	lysine	4016804.347	5071298.343	4052512.113	5831960.386	6797002.098	2720890.69	4911871.331	1674709.316	5065082.367	3129594.896	3378243.547	4134871.155	6440557.037	5579366.551	2336434.229	1746704.248	5160784.745	5542940.788
	glutamine	43139105.13	44306187.84	37954037.39	44604557.96	46379542.91	35561563.35	49244164.11	48948247.62	45933767.69	50138429.85	47213546.61	34397288.68	41682159.95	41386628.37	43114872.01	53970229.51	39813762.1	46904365.06
	O-acetyl-L-serine	14623.16909	12605.88891	7812.92003	14079.23385	21599.08446	21482.97536	17951.98325	19875.71946	19343.01111	12510.95518	14706.75333	6354.106628	7430.201488	6227.174256	10914.94278	25561.28197	10371.28375	12189.27832
	glutamate	2865115.126	2679134.098	3605980.232	3324265.783	3204631.04	3057656.556	2337007.027	2490682.336	3419982.643	2596260.053	3590247.443	3901007.462	3574946.24	2712610.483	4797660.57	7808899.627	3628924.151	2518281.455
	methionine	3425172.297	4169094.833	3829868.933	4640226.537	4814504.748	2843601.672	4428381.852	5775514.643	5368576.693	5363554.742	5211791.703	2631859.112	4209092.954	3558995.59	5367128.51	4587334.475	6425165.927	3758568.16
	guanine	78319.05505	57429.58553	33976.3118	85292.56699	66229.44612	49189.42914	50826.39263	47563.56774	78884.86365	65683.4782	52891.79413	33190.83241	54483.18168	39730.23248	58558.74508	70836.52697	73780.3196	89615.41589
	histidine	28139164.56	26691726.94	24065868.83	32679267.44	36434815.12	24731304.01	34642021.17	39756771.79	35747808.07	34751523.36	31969757.01	21657432.41	30031538.92	28470529.26	34851875.82	44041135.06	41854738.9	35112034.45
	2-Aminooctanoic acid	16636088.75	15871803.43	19971919.05	17608511.4	14326260.32	24198453.27	11596594.63	16956059.78	11529180.92	11925048.3	12029359.37	6709566.58	15418279.87	9729380.191	16230893.06	7786670.804	8662991.292	11589883.8
	carnitine	65510239.16	51517263.36	50786664.08	50605456.39	49633955.47	62366810.1	54717306.11	51671838.59	62908709.84	51854293.76	50686116.67	28978780.2	52744946.88	59125585.46	51745524.98	37648885.56	53904189.86	52769916.98
	Methionine sulfoxide	360323.3519	628747.7794	281401.8111	347406.6908	440474.0446	196691.6805	421514.4042	315732.1507	494960.4973	260126.8449	446260.8788	122091.8305	292616.0447	291011.2146	382257.5133	260671.1006	453055.8548	333919.2669
	phenylalanine	24603224.41	22058748.3	19166032.88	19883186.31	23421810.57	22816584.72	19259367.28	9990767.098	18587443.37	20154121.97	16786665.28	12183178.2	16955816.16	17345271.18	13489078.43	11229594.1	10348167.68	20472596.19
	Pyridoxamine	NA	5343.157362	NA	NA	NA	NA	NA	NA	NA	NA	NA	NA	NA	NA	NA	NA	5754.462216	NA
	pyridoxine	NA	5643.209372	8023.231567	7344.371539	NA	NA	NA	4102.923662	NA	NA	NA	NA	NA	NA	NA	NA	NA	6760.612304
	1-Methyl-Histidine	13377261.55	20187180.09	12525941.79	16520154.34	18865725.64	14537618.29	22189745.03	15359699.66	44332251.16	17058159.78	36846577.26	9157168.706	11700362.03	24342064.91	15118848.6	26274111.08	19065321.92	14046797.69
	N-acetyl-L-ornithine	259486.6009	492703.8638	361787.4133	405240.0808	462819.2803	268035.6572	192608.5094	13589.80559	410623.3245	239885.641	252097.5844	454303.3945	468359.6694	387534.6413	220635.0011	NA	247561.7778	393777.3553
	arginine	10672085.57	17956541.66	14758461.51	15328921.94	16174337.37	11694949.47	6538798.221	5944405.658	13194756.95	9594895.668	11539019.32	15749391.3	17192228.96	15145792.26	7433850.029	3387021.524	9514389.33	11659233.49
	citrulline	12210871.61	20642654.81	13568532.86	14849822.29	14865069.06	10087550.45	16117173.95	16822286.98	15500760.79	14912899.32	18747497.15	7143852.794	16613858.4	15449071.07	14646270.58	31294455.16	15298570.43	15063937.34
	N-carbamoyl-L-aspartate	20968.38303	35658.51333	20960.28039	26741.84069	20451.98041	26484.42321	18354.15521	17306.52104	13626.90773	17825.1924	22554.30546	99645.67101	15730.46823	21536.3625	24228.28427	47206.52521	22548.57117	11056.08036
	glucosamine	2279691.087	2774734.608	1358879.818	1285223.635	1459796.556	3496197.166	1233263.291	3803025.1	2173371.079	2369630.762	1769979.019	627154.4295	2232038.364	3647953.312	2142851.693	1969949.185	1626965.962	2314732.528
	tyrosine	2229911.657	2844733.772	2003921.458	2367972.768	2092582.014	1645636.656	1629591.426	1609295.313	1740805.472	2063565.332	2224590.818	1705147.595	2263386.346	1574665.228	2375884.518	2985296.471	2458766.253	2542167.303
	Phosphorylcholine	5592148.077	4447515.086	4766992.128	5775366.108	7222277.463	5859996.821	8223359.715	5603022.913	3249477.162	7728889.782	3978316.689	4099129.206	11086995.59	3677738.5	15745133.12	7287298.475	4584156.838	10329861.39
	3-phospho-serine	NA	NA	1573.248694	NA	4194.070109	6294.04871	2099.299739	5767.223794	NA	3147.550633	NA	NA	NA	NA	NA	4717.506956	NA	NA
	N6-Acetyl-L-lysine	2526401.902	3505329.929	2167418.915	5137324.319	2784561.348	2095369.878	3303226.832	1480349.414	2690709.123	2475471.361	2897548.216	5685398.23	4224583.282	1815554.708	3244842.895	3330869.777	2529200.996	3172244.964
	Acetyllysine	1744733.798	2990785.493	2201776.275	4159603.321	2347485.083	1672272.741	2738441.279	1318319.809	2304381.071	2149134.74	2381248.563	4735665.392	3460795.754	1341931.075	2714665.339	2918111.759	1934421.048	2549360.974
	N-acetyl-glutamine	267082.4744	314362.5591	114859.4422	208359.0645	114354.3491	387680.7444	186742.6085	662437.4459	395780.7416	284569.3422	187767.8635	50267.48274	268916.3449	394052.0299	484547.7206	590474.1887	230654.8747	325623.6165
	N-acetyl-glutamate	140230.4146	127901.8603	36988.37751	108633.6858	151544.7829	193455.3615	118812.1268	171208.6901	195279.271	113522.5563	162711.5288	38032.7307	67240.82753	145543.286	149924.0772	370444.9432	69582.61424	127251.6895
	Ng,NG-dimethyl-L-arginine	3744895.053	8519351.677	3376482.234	5570954.428	4577367.663	4685998.299	4942597.23	1323530.626	5985287.735	4038767.734	5978866.937	3682590.583	4880219.455	8045517.719	1194965.178	NA	2606721.09	4745956.015
	Acetylcarnitine DL	50486446.26	57601706.06	51333570.85	51629250.59	50096291.99	57478380.88	52280879.5	56341157.27	50779721.04	52387823.1	51224832.62	36742806.96	53040509.07	58173610.63	54222230.2	64812414.86	51867748.88	54678556.91
	tryptophan	13988218.05	12981589.07	11559962.9	12489320.67	11545381.44	13435750.91	11942622.33	7423453.614	12414136.04	15975934.08	14917123.17	4446534.664	13977136.1	6169031.239	6296435.224	2110418.139	8155578.587	11911694.34
	Kynurenine	161003.0828	183930.834	129509.8018	190401.77	166822.4869	155808.2924	164384.0397	114273.6974	198982.176	150547.1689	239008.8061	57645.17747	112665.2528	89396.89402	70159.54077	50435.39885	148904.9693	110941.8059
	N-acetyl-glucosamine	58159.058	46011.657	55977.70695	88611.75986	101729.9535	67798.85872	78735.7772	130212.7311	52459.16585	110118.1153	74923.60691	24124.31845	53071.94201	61351.83024	73920.8722	119560.7271	82970.25993	94675.69229
	Flavone	6651.213863	11640.64266	8559.821942	7258.047523	16348.21764	6647.389878	6347.704607	11833.95524	13138.05434	6457.857904	16585.62947	5312.261327	9909.788175	14809.67459	13627.89067	18696.20582	16201.16882	4733.934758
	cystathionine	66466.39031	52961.20151	101669.7657	91763.7923	108030.3569	59729.9736	103827.3389	96412.59778	58208.67417	108549.8172	123785.6065	49303.13543	61974.82321	80079.30455	79214.17146	81785.03472	72361.74928	79741.0665
	5-methoxytryptophan	NA	7436.649473	10688.76689	16801.64213	6813.406051	13167.14543	NA	NA	7826.273479	12580.62885	6794.172893	6294.718726	22005.2621	17284.52011	11516.30108	9447.695875	NA	15832.80028
	Cystine	2287944.842	4969619.911	4936955.288	4571690.985	6129568.063	2002520.962	3794607.132	5787027.944	6667643.799	2888232.141	6038783.796	553567.2383	3799244.284	5551518.614	1255416.648	2470392.686	8998960.97	2008876.51
	cytidine	2520290.271	1834343.175	1876655.076	2317212.964	3061790.414	3204246.531	2878007.313	2826515.866	1238023.571	3024523.366	2293751.361	747775.9191	2986268.237	2407291.87	3597163.296	2591380.381	2489697.101	3923356.496
	biotin	99266.94754	44654.81405	133471.4091	72339.98632	107758.051	89761.40442	85319.02892	81145.03173	75028.19031	65497.13725	64857.32701	90146.09106	77314.43202	83966.82854	67247.03604	128011.4375	128786.8907	108140.2265
	deoxyadenosine	16008.81778	27230.53011	13655.76712	7218.80416	19373.86845	28297.65451	13654.06751	35025.28208	13186.34384	38916.48006	22111.01562	NA	14816.76428	29897.40867	41344.04403	19480.5061	14720.72025	33933.20642
	Glycerophosphocholine	40976224.27	37667936.55	40839610.36	43512751.72	45054236.57	45333468.78	41966849.08	44853738.59	39180970.37	43955830.92	41509099.08	34075275.75	44044119.72	39761016.24	46565862.16	42381963.22	49899500.45	42503982.81
	acadesine	10450.09917	10278.8438	NA	NA	NA	14752.38948	6267.57926	12636.50148	6309.838133	7359.733984	5791.357621	5248.941635	3684.696253	7852.4575	14185.49377	9936.283425	4143.36643	6287.837089
	D-glucosamine-6-phosphate	13766.15665	13686.80105	10997.18636	8365.99127	7863.557868	7874.457515	18935.30217	10546.5908	9450.658584	17308.4211	7888.351213	NA	5777.30073	10047.29768	8916.0376	7861.83452	2620.430967	6731.489193
	D-glucosamine-1-phosphate	NA	NA	NA	NA	3668.217822	4734.352108	4195.421001	NA	NA	NA	NA	NA	NA	NA	6769.457516	NA	4182.722581	3655.136219
	thiamine	NA	NA	NA	NA	12307.76737	10551.22758	NA	NA	NA	NA	NA	NA	NA	8045.30628	NA	NA	3764.379072	NA
	S-ribosyl-L-homocysteine-posi	147387.1437	281071.8898	77021.00185	83852.04626	45017.36486	365702.9956	112078.5459	324770.9218	319432.3305	264871.4125	153181.8525	21748.68368	172172.5132	304123.625	291873.4012	125801.448	145045.7246	166338.5092
	deoxyguanosine	NA	NA	NA	NA	NA	NA	NA	NA	NA	NA	NA	NA	NA	NA	NA	NA	NA	NA
	adenosine	1638779.202	4260809.892	1537090.65	2824468.525	1780274.671	4032552.427	2948775.687	4253611.534	2839713.303	6560073.044	5898397.64	163105.2265	2727919.275	9344576.129	4318145.948	3006949.404	5009681.477	5242460.594
	1-Methyladenosine	42230.09808	69973.61178	36467.86864	38734.76847	45627.30072	231227.5645	27875.00572	85509.54732	45679.90473	49793.83603	29366.06052	NA	47191.47643	125838.6952	92225.52861	81810.07299	55460.32635	33036.02112
	guanosine	24529.0257	6112.037841	5402.836733	13597.85534	15732.84826	17488.0678	22071.22685	11534.26794	9245.977627	38695.20727	5183.787374	NA	22554.39333	17273.42034	33035.37826	40342.96583	20453.82772	25160.61017
	L-arginino-succinate	73579.39084	59978.14393	62164.50329	84552.05322	129563.9815	151920.0198	123760.451	207429.4707	97924.62024	190613.252	188586.7565	13421.26007	62681.67303	133461.9629	81747.47837	507276.9053	92779.33473	109733.8637
	S-methyl-5-thioadenosine	NA	NA	NA	5031.156807	NA	NA	NA	NA	NA	NA	NA	NA	NA	NA	NA	NA	NA	NA
	7-methylguanosine	30954.26831	46496.80297	28269.51815	27887.87379	23569.08333	25438.08843	21750.9831	54498.84608	15166.54399	27868.79286	22453.50291	13194.92643	22901.36051	17740.20812	49904.25097	91627.99967	34038.24903	21422.75812
	dCMP	NA	NA	NA	NA	NA	NA	NA	NA	NA	4196.793171	6292.569782	NA	4735.533	NA	NA	4193.882204	NA	NA
	glutathione	86451.71841	41909.43357	60100.06506	115245.0315	134584.1833	78886.65361	123690.8053	88864.11341	65246.26955	113378.7086	77834.29112	89478.68797	82180.28737	58668.99752	75158.46644	162744.426	38278.4756	67549.59063
	dTMP	NA	NA	NA	NA	NA	NA	NA	NA	NA	NA	NA	NA	NA	NA	NA	NA	NA	NA
	CMP	154184.9641	153605.9436	197694.3642	72751.59176	180393.5951	57678.89532	280782.8592	160808.0936	109476.5854	173687.3444	96480.89924	98062.28125	130522.0756	216056.9984	152599.9158	198251.6967	68174.69821	91273.29395
	UMP	176198.7102	81806.55363	174061.7063	81775.39206	259415.4558	29889.74335	371087.2	96968.53812	107507.2644	186187.8054	115233.2712	61298.47343	112231.0336	121126.4277	113505.7367	74976.17705	17271.85091	59362.22008
	dAMP	10486.19818	8628.199441	6292.589286	9440.161241	6302.04007	6797.354295	8889.281528	8911.615694	18034.36215	9433.419128	7097.264787	NA	9442.548575	7153.507411	8919.88944	22516.63827	NA	9431.102915
	Nicotinamide ribotide	NA	NA	NA	5666.865563	4187.667611	NA	9436.305256	NA	5235.937983	NA	NA	4666.750402	20449.91249	NA	9428.767443	NA	NA	NA
	aminoimidazole carboxamide ribonucleotide	11555.71352	12469.08899	7024.82488	NA	7510.45118	7432.917175	11535.87755	16432.17716	8915.174768	20455.34547	9437.344802	NA	8243.54863	9952.629562	18352.62268	13553.10242	NA	11552.63711
	thiamine-phosphate	56631.46276	44023.79064	76349.63759	122017.9708	155816.5443	29481.37933	60227.47404	162833.5949	9962.745637	40901.17251	41935.28436	12583.74512	89708.9682	35653.64439	160692.4594	42931.29725	88381.85073	143599.7218
	dGMP	NA	NA	5579.818813	5754.592995	7485.281973	NA	5193.340481	NA	8914.387091	NA	NA	NA	NA	6292.679517	NA	NA	NA	NA
	AMP	19741467.13	7085508.206	17643181.24	9979129.511	25779121.49	2376897.198	29254578.68	10112274.62	11910671.52	22628718.85	15229254.32	13327715.39	13927771.74	10365258.64	15318197.12	10289578.2	1455380.132	10137564.14
	IMP	1238026.401	569891.4835	1543046.676	732512.8096	2457918.452	234430.1838	2443239.089	852839.7044	948395.5584	1667856.67	1003916.936	1067677.772	1024179.534	847049.6273	1120813.872	866173.3105	131853.5961	727017.4339
	S-adenosyl-L-methioninamine	NA	NA	NA	NA	NA	NA	NA	NA	NA	NA	NA	NA	NA	NA	NA	NA	NA	NA
	GMP	1750738.089	495169.9369	1528535.432	928521.16	2562222.504	303424.8788	3663801.474	883354.6733	1027121.525	2773609.537	1753448.766	826562.9402	1612114.383	1350631.2	1543648.203	1456626.088	195070.8321	976440.417
	xanthosine-5-phosphate	NA	NA	NA	NA	NA	NA	NA	NA	NA	NA	NA	NA	NA	NA	NA	NA	NA	NA
	riboflavin	14123.91639	16752.36618	22590.07212	17100.42177	15198.27707	8393.415711	5238.178697	26743.44127	8394.142109	13122.50708	11023.31312	14692.00673	12673.45844	5766.414479	16256.10071	31477.53155	9911.455732	7865.564435
	S-adenosyl-L-homoCysteine-posi	168165.8114	73413.98388	77579.13174	51915.69379	408312.0673	51334.7663	174566.9964	113804.7063	76555.5308	189309.0109	188234.0874	38280.60816	62690.99456	15725.52096	91744.7876	312503.3565	24627.3191	87571.43246
	S-adenosyl-L-methionine	5243.078737	NA	6816.591436	NA	18345.96501	NA	23073.88904	6800.500655	NA	11009.13593	NA	8912.849439	NA	NA	8390.320378	8915.27811	7748.637509	16782.42182
	folate	NA	NA	NA	NA	NA	NA	NA	NA	NA	NA	NA	NA	NA	NA	NA	3670.032393	NA	NA
	7,8-dihydrofolate	NA	NA	NA	NA	NA	NA	NA	NA	NA	NA	NA	NA	NA	NA	NA	NA	NA	NA
	5-methyl-THF	2620.774471	10486.98778	9944.35764	6815.268032	5766.400598	10486.8728	18876.97614	12583.72878	27269.46263	24648.7926	32510.22783	NA	NA	17303.77404	8401.957407	13109.18966	9438.722667	8918.31875
	Diiodothyronine	NA	NA	NA	NA	NA	NA	NA	NA	NA	NA	NA	NA	NA	NA	NA	NA	NA	NA
	glutathione disulfide-posi	289455.7379	42996.40139	88625.83298	350800.2191	471384.2044	174627.8894	704882.5663	288925.3556	65529.34815	681705.1383	104349.7412	154281.4664	248431.3798	79701.50668	341360.507	301529.8741	25171.08041	245416.6966
	NAD+_posi	NA	NA	NA	37755.17223	3670.395778	NA	7334.914882	NA	4193.868227	NA	3670.115745	NA	19392.59248	NA	NA	NA	NA	7864.465496
	NADH	NA	NA	NA	NA	NA	NA	NA	NA	NA	NA	NA	NA	NA	NA	NA	NA	NA	NA
	dephospho-CoA-posi	3144.735185	6290.990937	8388.089958	6290.950463	21001.86601	NA	52962.49182	18875.33754	4194.157911	13633.11414	9963.137486	NA	4720.978081	8389.354773	12059.90583	9962.619615	7342.091577	4195.635703
	NADP+_posi	NA	NA	NA	NA	2622.614938	NA	4717.809158	NA	NA	NA	2620.998045	NA	NA	NA	NA	NA	NA	NA
	NADPH	NA	NA	NA	NA	NA	NA	NA	NA	NA	NA	NA	NA	NA	NA	NA	NA	NA	NA
	coenzyme A-posi	NA	NA	NA	NA	NA	NA	NA	NA	NA	NA	NA	NA	NA	NA	NA	NA	NA	NA
	FAD	NA	NA	NA	NA	NA	NA	3670.321048	NA	NA	NA	NA	NA	NA	NA	NA	NA	NA	NA
	acetyl-CoA-posi	NA	NA	NA	NA	NA	NA	NA	NA	NA	NA	NA	NA	NA	NA	NA	NA	NA	NA
	propionyl-CoA-posi	NA	NA	NA	NA	NA	NA	NA	NA	NA	NA	NA	NA	NA	NA	NA	NA	NA	NA
	acetoacetyl-CoA-posi	NA	NA	NA	NA	NA	NA	NA	NA	NA	NA	NA	NA	NA	NA	NA	NA	NA	NA
	malonyl-CoA-posi	NA	NA	NA	NA	NA	NA	NA	NA	NA	NA	NA	NA	NA	NA	NA	NA	NA	NA
	succinyl-CoA-posi	NA	NA	NA	NA	NA	NA	NA	NA	NA	NA	NA	NA	NA	NA	NA	NA	NA	NA
	sarcosine	1177963.95	1254490.565	1056699.195	1156551.236	1331376.024	1165975.561	1286803.169	2049281.112	865161.0634	1603152.557	1157828.068	1076379.867	1297677.861	1567465.258	1815786.852	3311763.245	1200903.547	1793901.87
	putrescine	5085.715954	19981.94127	9074.574873	9518.225165	NA	22468.14803	NA	NA	NA	NA	16405.60766	16404.95616	9721.928098	8157.650591	9580.479808	5480.926866	NA	15187.43744
	spermidine	40830.4964	83173.08137	58026.92336	58480.80005	47612.99983	54903.07625	39591.76177	43349.39565	57415.97967	29780.84066	61694.45381	30413.64249	49243.85843	58522.32299	33929.46786	34647.71086	44160.34928	70756.50113
	spermine	4193.290528	2637.348653	8334.079258	NA	6200.656842	4178.26265	4132.079945	4161.55088	NA	4194.977812	NA	NA	7285.68971	4642.684757	10991.70187	4687.139172	NA	3667.725567
	N-acetyl spermine	35754.20299	26178.08588	31435.37719	25356.048	11191.88312	15799.28129	15888.2341	12057.3602	17987.76742	23345.57462	21950.9627	8325.588781	44951.5769	31969.07839	18223.30828	17795.01129	32944.15216	29761.46988
	N-acetyl spermidine	38036.74652	30118.33574	17003.15557	20338.26936	22806.07971	16733.75708	16368.26309	7270.652616	18278.01812	NA	13343.54765	10096.40637	19013.1453	24138.1141	7971.425857	6418.186343	11528.18396	7726.440092
