# Supplementary material for: Restored TDCA and valine levels imitate the effects of bariatric surgery
Source: eLife. 2021 Jun 22;10:e62928. doi: 10.7554/eLife.62928 (PMC8257250; doi:10.7554/eLife.62928)
Supplement: Figure 3—source data 1. [file elife-62928-fig3-data1.xlsx]

## Sheet: Tabelle1
Figure 3
A)
	Days	obese control					lean control					obese + T&V					lean + T&V					Sgx
	0	40.9	39.7	40.15	41.04	39.3	27.6	29.15	27.3	28.8	29	44.35	46.3	45.06	43.18	41.91	28.96	29.4	29.84	31.08	29	41.6	42	41.5	41.1	40.5
	1	41.08	39.53	40.2	40.45	39.09	27.65	29.57	28.03	30.01	29.5	42.02	43.74	42.3	40.93	39.6	28.36	27.86	29.71	30.3	28.43	39.1	39.5	39.1	39.8	37.6
	2	40.55	39.74	39.88	40.82	38.89	27.59	29.63	27.52	29.12	29.2	40.32	41.91	40.9	39.29	38.13	28.75	28.22	29.9	31.52	28.73	37.4	38.4	37.5	37.8	36.8
	3	40.29	38.98	40.45	40.3	38.33	27.11	29.71	27.59	29.79	29.21	38.6	39.56	38.58	37.59	35.66	29.06	29.07	29.86	33.1	28.72	35.4	36.2	35.2	35.7	35.6
	4	39.98	38.64	40.39	40.74	37.4	26.76	29.61	27	29.63	28.82	38.08	37.89	37.11	36.4	34	28.72	29.58	29.87	31.17	27.91	35	35.6	35.5	35.4	35.2
	5	40.62	39.26	39.68	41.11	38.14	26.8	30.03	27.5	29.3	28.32	38.3	36.27	35.27	35.44	31.61	28.59	29.84	30.2	33.11	26.65	35.2	34.8	35.6	36.1	35.1
	6	40.61	39.44	39.9	41.36	38.03	27.11	29.66	27.29	29.22	28.22	37.55	35.73	34.8	35	30.61	28.12	30.75	30.07	32.8	25.46	35.7	35	35.8	35.8	35.6
	7	41.08	39.32	39.63	41.42	39.01	27.22	30.04	27.25	29.39	28.41	37.6	34.44	35.73	34.03	31.08	28.56	31.34	29.8	32.18	25.58	35.4	34.4	35.2	35.4	35.3
	8	41.89	38.64	39.47	41.01	39.55	27.46	27.28	27.63	29.12	28.04	36.64	34.62	34.42	33.66	31.46	28.1	31.15	29.99	32.14	27.08	35	34.5	34.9	35.1	34.8
	9	42.31	38.77	40.01	40.87	38.85	27.6	30.27	27.67	29.65	27.57	36.71	32.76	33.2	32.87	32.25	28.66	29.54	30.07	31.25	27.65	35.3	34.9	35.5	35.4	35.4
	10	42.21	38.96	40.35	41.28	39.28	27.53	29.39	27.39	28.34	27.98	35.55	32.9	32.58	30.88	31.37	27.88	27.75	29.51	31.08	27.72	35.3	35.1	35.2	35.3	35.2
	11	41.93	39.31	39.92	40.71	39.31	28.38	29.96	27.51	29.6	28.39	35.59	32.15	31.85	29.01	31.38	28.09	28.63	29.81	30.33	27.54	35.8	35.5	35.9	36	35.8
	12	41.3	39.09	40.29	41.44	39	27.33	29.55	27.68	29.25	28.72	34.65	30.9	30.79	28.37	31.3	28.17	29.15	29.71	30.72	27.24	36.1	36	36.5	36.2	36.4
	13	41.22	39.4	40.35	40.87	38.76	27.11	30.14	27.4	29.56	29.29	33.14	30.46	29.98	28.14	30.5	28.67	29.23	30.02	30.99	27.19	36.5	36.7	37	36.4	36.8
	14	41.29	39.62	40.47	41.32	39.17	27.34	30.01	27.95	29.55	29.17	32.85	30.29	29.14	28.07	30.11	28.57	29.31	29.64	30.79	27.22	36.4	36.5	37.1	36	37.2
B)
		Obese control					SGx					T&V
	Day 0	40.9	39.7	40.15	41.04	39.3	41.6	42	41.5	41.1	40.5	44.35	46.3	45.06	43.18	41.91
	Day 7	41.08	39.32	39.63	41.42	39.01	35.4	34.4	35.2	35.4	35.3	37.6	34.44	35.73	34.03	31.08
	Day 14	41.29	39.62	40.47	41.32	39.17	36.4	36.5	37.1	36	37.2	32.85	30.29	29.14	28.07	30.11
C)
	Lean			Obese				Lean			Obese
	PBS	T&V	PBS	SGx	T&V			PBS	T&V	PBS	SGx	T&V
	0.58	0.36	1.98	0.94	1.24			0.52	0.39	1.99	1.038	0.75
	0.49	0.34	1.92	1.57	1.23			0.73	0.228	2.76	1.48	1.43
	0.17	0.24	1.41	1.47	1.07			0.42	0.28	1.96	1.69	0.78
	0.18	0.1	1.73	1.24	1.28			0.31	0.18	1.67	1.69	1.03
	0.32	0.06	1.94	1.25	1.14			0.35	0.1	1.81	1.42	0.63
	0.19		2.68		1.06			0.25		2.6		0.51
			2.01		1.68					2.28		0.91
			1.68		1.17					2.37		0.87
			2		1.31					3		0.74
			1.82		1.38					2.3		0.84
			2.21							2
										2.75
D)
	Lean				Obese
	PBS	T&V	PBS	PBS fast	T&V	T&V fast	SGx
	536.057	40.921	5614.15	2942.07	558.492	1700.69	1584.19
	554.162	49.58	5353.6	2887.76	529.76	1684.16	1512.95
	170.018	242.439	3508.84	3602.91	446.319	1270.5	1652.67
	131.447	124.362	3731.22	3854.81	541.567	1594.42	1655.43
	121.607	5.89148	2943.25	1472.8	846.206	1007.97	3036.93
	61.3877	40.1338	3189.25	1568.44	869.034	1056.78	3145.56
	54.6966		4710.08	2660.26	1096.92	755.287	2012.02
	70.8338		5304.4	2675.61	1212.24	727.736	2420.57
	377.047		4961.98	3837.1		408.928	2517.39
	65.3236		3950.06	3219.55		266.842	2638.61
			4129.53	2574.07		653.741
			4789.98	2879.49		1178.79
E)
	Time	Obese control					T&V					SGx					Lean control
	0	167	202	302	226	175	80	118	112	92	126	119	159	112	80	127	119	142	147	120	166
	15	363	476	600	371	553	289	234	198	355	339	183	357	311	331	289	267	203	249	219	288
	30	369	462	600	451	555	177	145	187	155	183	171	251	277	328	218	221	173	201	178	260
	60	370	393	600	468	503	165	157	151	143	182	111	149	242	182	178	185	175	184	167	194
	120	276	241	416	292	321	110	108	108	79	172	145	145	157	118	127	189	155	155	149	166
