# Supplementary material for: Restored TDCA and valine levels imitate the effects of bariatric surgery
Source: eLife. 2021 Jun 22;10:e62928. doi: 10.7554/eLife.62928 (PMC8257250; doi:10.7554/eLife.62928)
Supplement: Figure 4—source data 1. [file elife-62928-fig4-data1.xlsx]

## Sheet: Tabelle1
Figure 4
A-F)		All Data															Meta-Data including group assignments and masses
		,"subject.id","subject.mass","cage","Date.Time","vo2","vco2","ee","rer","feed","feed.acc","drink","drink.acc","xytot","xyamb","pedmeter","allmeter","body.temp","hour","day","exp.hour","exp.day"															,group1,group2,group_names,colors,xrange,outliers,errorbars,mri,light,exc,Total.Mass,id
		1,"Subject 11",1,"0111",2016-07-12 09:31:53,150.6472,116.4966,0.7,0.773,-0.03,-0.03,NA,NA,8926,5155,NA,NA,0,2016-07-12 09:00:00,2016-07-12,0,0															1,Subject 1,Subject 10,Control,#050505,0,Yes,Yes,No,7,145,39.9,Subject 1
		2,"Subject 11",1,"0111",2016-07-12 09:59:53,130.625,99.484,0.6,0.761,-0.02,-0.05,NA,NA,8417,4872,NA,NA,0,2016-07-12 09:00:00,2016-07-12,0,0															2,Subject 2,Subject 11, Treatment,#FC052E,145,NA,NA,NA,19,145,38.28571429,Subject 2
		3,"Subject 11",1,"0111",2016-07-12 10:27:53,116.3712,86.4842,0.6,0.743,0.01,-0.04,NA,NA,5437,2275,NA,NA,0,2016-07-12 10:00:00,2016-07-12,1,0															3,Subject 3,Subject 12,NA,NA,NA,NA,NA,NA,NA,145,43.07142857,Subject 3
		4,"Subject 11",1,"0111",2016-07-12 10:55:53,104.8344,77.0374,0.5,0.735,0,-0.04,NA,NA,3076,1051,NA,NA,0,2016-07-12 10:00:00,2016-07-12,1,0															4,Subject 4,Subject 7,NA,NA,NA,NA,NA,NA,NA,145,37.61428571,Subject 4
		5,"Subject 11",1,"0111",2016-07-12 11:23:53,98.1046,74.9892,0.5,0.764,0,-0.04,NA,NA,1612,618,NA,NA,0,2016-07-12 11:00:00,2016-07-12,2,0															5,Subject 5,Subject 8,NA,NA,NA,NA,NA,NA,NA,145,34.3,Subject 5
		6,"Subject 11",1,"0111",2016-07-12 11:51:53,105.545,80.0888,0.5,0.759,-0.01,-0.05,NA,NA,4239,1436,NA,NA,0,2016-07-12 11:00:00,2016-07-12,2,0															6,Subject 6,Subject 9,NA,NA,NA,NA,NA,NA,NA,145,40.31428571,Subject 6
		7,"Subject 11",1,"0111",2016-07-12 12:19:53,81.928,59.0634,0.4,0.721,0,-0.05,NA,NA,1830,476,NA,NA,0,2016-07-12 12:00:00,2016-07-12,3,0															7,NA,NA,NA,NA,NA,NA,NA,NA,NA,145,39.91428571,Subject 7
		8,"Subject 11",1,"0111",2016-07-12 12:47:53,89.6192,67.3398,0.4,0.751,0.01,-0.04,NA,NA,1208,351,NA,NA,0,2016-07-12 12:00:00,2016-07-12,3,0															8,NA,NA,NA,NA,NA,NA,NA,NA,NA,145,38.08571429,Subject 8
		9,"Subject 11",1,"0111",2016-07-12 13:15:53,95.8056,70.0986,0.5,0.732,-0.01,-0.05,NA,NA,2500,718,NA,NA,0,2016-07-12 13:00:00,2016-07-12,4,0															9,NA,NA,NA,NA,NA,NA,NA,NA,NA,145,38.38571429,Subject 9
		10,"Subject 11",1,"0111",2016-07-12 13:43:53,89.661,67.7996,0.4,0.756,0,-0.05,NA,NA,434,48,NA,NA,0,2016-07-12 13:00:00,2016-07-12,4,0															10,NA,NA,NA,NA,NA,NA,NA,NA,NA,145,38.7,Subject 10
		11,"Subject 11",1,"0111",2016-07-12 14:11:53,87.2784,66.044,0.4,0.757,0,-0.05,NA,NA,367,18,NA,NA,0,2016-07-12 14:00:00,2016-07-12,5,0															11,NA,NA,NA,NA,NA,NA,NA,NA,NA,145,36.7,Subject 11
		12,"Subject 11",1,"0111",2016-07-12 14:39:53,100.0274,77.9152,0.5,0.779,0,-0.05,NA,NA,778,116,NA,NA,0,2016-07-12 14:00:00,2016-07-12,5,0															12,NA,NA,NA,NA,NA,NA,NA,NA,NA,145,34.68571429,Subject 12
		13,"Subject 11",1,"0111",2016-07-12 15:07:53,85.4392,64.9572,0.4,0.76,0,-0.05,NA,NA,1423,300,NA,NA,0,2016-07-12 15:00:00,2016-07-12,6,0															13,NA,NA,NA,NA,NA,NA,NA,NA,NA,,NA,NA
		14,"Subject 11",1,"0111",2016-07-12 15:35:53,99.6512,74.2368,0.5,0.745,0,-0.05,NA,NA,3112,900,NA,NA,0,2016-07-12 15:00:00,2016-07-12,6,0															14,NA,NA,NA,NA,NA,NA,NA,NA,NA,,NA,NA
		15,"Subject 11",1,"0111",2016-07-12 16:03:53,86.944,65.208,0.4,0.75,0,-0.05,NA,NA,853,80,NA,NA,0,2016-07-12 16:00:00,2016-07-12,7,0															15,NA,NA,NA,NA,NA,NA,NA,NA,NA,,NA,NA
		16,"Subject 11",1,"0111",2016-07-12 16:31:53,86.8604,67.1726,0.4,0.773,0,-0.05,NA,NA,678,44,NA,NA,0,2016-07-12 16:00:00,2016-07-12,7,0															16,NA,NA,NA,NA,NA,NA,NA,NA,NA,,NA,NA
		17,"Subject 11",1,"0111",2016-07-12 16:59:53,100.4036,76.0342,0.5,0.758,0,-0.05,NA,NA,901,128,NA,NA,0,2016-07-12 16:00:00,2016-07-12,7,0															17,NA,NA,NA,NA,NA,NA,NA,NA,NA,,NA,NA
		18,"Subject 11",1,"0111",2016-07-12 17:27:53,80.7576,61.028,0.4,0.756,0,-0.05,NA,NA,445,9,NA,NA,0,2016-07-12 17:00:00,2016-07-12,8,0															18,NA,NA,NA,NA,NA,NA,NA,NA,NA,,NA,NA
		19,"Subject 11",1,"0111",2016-07-12 17:55:53,86.8604,64.6646,0.4,0.744,0,-0.05,NA,NA,151,16,NA,NA,0,2016-07-12 17:00:00,2016-07-12,8,0															19,NA,NA,NA,NA,NA,NA,NA,NA,NA,,NA,NA
		20,"Subject 11",1,"0111",2016-07-12 18:23:53,106.5482,79.4618,0.5,0.746,0,-0.05,NA,NA,2591,986,NA,NA,0,2016-07-12 18:00:00,2016-07-12,9,0															20,NA,NA,NA,NA,NA,NA,NA,NA,NA,,NA,NA
		21,"Subject 11",1,"0111",2016-07-12 18:51:53,98.648,73.568,0.5,0.746,0,-0.05,NA,NA,2028,207,NA,NA,0,2016-07-12 18:00:00,2016-07-12,9,0															21,NA,NA,NA,NA,NA,NA,NA,NA,NA,,NA,NA
		22,"Subject 11",1,"0111",2016-07-12 19:19:53,94.5098,67.6324,0.4,0.715,0,-0.05,NA,NA,1895,460,NA,NA,0,2016-07-12 19:00:00,2016-07-12,10,0															22,NA,NA,NA,NA,NA,NA,NA,NA,NA,,NA,NA
		23,"Subject 11",1,"0111",2016-07-12 19:47:53,129.1202,96.4744,0.6,0.747,0.17,0.12,NA,NA,3107,1514,NA,NA,0,2016-07-12 19:00:00,2016-07-12,10,0															23,NA,NA,NA,NA,NA,NA,NA,NA,NA,,NA,NA
		24,"Subject 11",1,"0111",2016-07-12 20:15:53,113.3198,85.481,0.5,0.754,0.03,0.15,NA,NA,1189,238,NA,NA,0,2016-07-12 20:00:00,2016-07-12,11,0															24,NA,NA,NA,NA,NA,NA,NA,NA,NA,,NA,NA
		25,"Subject 11",1,"0111",2016-07-12 20:43:53,116.7056,92.2108,0.6,0.79,0.13,0.28,NA,NA,5077,2268,NA,NA,0,2016-07-12 20:00:00,2016-07-12,11,0
		26,"Subject 11",1,"0111",2016-07-12 21:11:53,99.6512,78.3332,0.5,0.786,0.1,0.38,NA,NA,1586,789,NA,NA,0,2016-07-12 21:00:00,2016-07-12,12,0
		27,"Subject 11",1,"0111",2016-07-12 21:39:53,115.8278,91.542,0.6,0.79,0.14,0.52,NA,NA,3469,1561,NA,NA,0,2016-07-12 21:00:00,2016-07-12,12,0
		28,"Subject 11",1,"0111",2016-07-12 22:07:53,140.9914,113.6542,0.7,0.806,0.16,0.68,NA,NA,4813,2666,NA,NA,0,2016-07-12 22:00:00,2016-07-12,13,0
		29,"Subject 11",1,"0111",2016-07-12 22:35:53,116.622,95.4294,0.6,0.818,0.16,0.84,NA,NA,4776,2212,NA,NA,0,2016-07-12 22:00:00,2016-07-12,13,0
		30,"Subject 11",1,"0111",2016-07-12 23:03:53,124.773,101.783,0.6,0.816,0.05,0.89,NA,NA,3910,1967,NA,NA,0,2016-07-12 23:00:00,2016-07-12,14,0
		31,"Subject 11",1,"0111",2016-07-12 23:31:53,114.7828,91.8764,0.6,0.8,0.01,0.9,NA,NA,2836,1058,NA,NA,0,2016-07-12 23:00:00,2016-07-12,14,0
		32,"Subject 11",1,"0111",2016-07-12 23:59:53,98.23,76.4522,0.5,0.778,0.09,0.99,NA,NA,1827,273,NA,NA,0,2016-07-12 23:00:00,2016-07-12,14,0
		33,"Subject 11",1,"0111",2016-07-13 00:27:53,95.4712,77.6226,0.5,0.813,0.09,1.08,NA,NA,1453,503,NA,NA,0,2016-07-13 00:00:00,2016-07-13,15,1
		34,"Subject 11",1,"0111",2016-07-13 00:55:53,100.1528,82.3878,0.5,0.823,0.12,1.2,NA,NA,2083,440,NA,NA,0,2016-07-13 00:00:00,2016-07-13,15,1
		35,"Subject 11",1,"0111",2016-07-13 01:23:53,99.693,81.5518,0.5,0.818,0.08,1.28,NA,NA,1580,257,NA,NA,0,2016-07-13 01:00:00,2016-07-13,16,1
		36,"Subject 11",1,"0111",2016-07-13 01:51:53,103.9148,86.9022,0.5,0.836,0.04,1.32,NA,NA,2205,219,NA,NA,0,2016-07-13 01:00:00,2016-07-13,16,1
		37,"Subject 11",1,"0111",2016-07-13 02:19:53,113.3616,89.7028,0.5,0.791,0.09,1.41,NA,NA,961,92,NA,NA,0,2016-07-13 02:00:00,2016-07-13,17,1
		38,"Subject 11",1,"0111",2016-07-13 02:47:53,105.9212,85.5228,0.5,0.807,0.05,1.46,NA,NA,386,55,NA,NA,0,2016-07-13 02:00:00,2016-07-13,17,1
		39,"Subject 11",1,"0111",2016-07-13 03:15:53,89.5774,74.1114,0.4,0.827,0,1.46,NA,NA,807,89,NA,NA,0,2016-07-13 03:00:00,2016-07-13,18,1
		40,"Subject 11",1,"0111",2016-07-13 03:43:53,132.6314,108.5546,0.6,0.819,0.04,1.5,NA,NA,2500,926,NA,NA,0,2016-07-13 03:00:00,2016-07-13,18,1
		41,"Subject 11",1,"0111",2016-07-13 04:11:53,112.442,91.124,0.5,0.811,0.23,1.73,NA,NA,4942,2506,NA,NA,0,2016-07-13 04:00:00,2016-07-13,19,1
		42,"Subject 11",1,"0111",2016-07-13 04:39:53,98.021,78.5004,0.5,0.801,0,1.73,NA,NA,686,112,NA,NA,0,2016-07-13 04:00:00,2016-07-13,19,1
		43,"Subject 11",1,"0111",2016-07-13 05:07:53,91.5838,73.5262,0.4,0.803,0.02,1.75,NA,NA,1833,553,NA,NA,0,2016-07-13 05:00:00,2016-07-13,20,1
		44,"Subject 11",1,"0111",2016-07-13 05:35:53,132.7986,108.3456,0.6,0.816,0.06,1.81,NA,NA,4161,1950,NA,NA,0,2016-07-13 05:00:00,2016-07-13,20,1
		45,"Subject 11",1,"0111",2016-07-13 06:03:53,100.529,76.7866,0.5,0.764,0,1.81,NA,NA,1862,376,NA,NA,0,2016-07-13 06:00:00,2016-07-13,21,1
		46,"Subject 11",1,"0111",2016-07-13 06:31:53,88.3234,65.417,0.4,0.741,0.01,1.82,NA,NA,377,15,NA,NA,0,2016-07-13 06:00:00,2016-07-13,21,1
		47,"Subject 11",1,"0111",2016-07-13 06:59:53,104.291,85.3974,0.5,0.819,0.04,1.86,NA,NA,1718,420,NA,NA,0,2016-07-13 06:00:00,2016-07-13,21,1
		48,"Subject 11",1,"0111",2016-07-13 07:27:53,106.2138,88.3234,0.5,0.831,0.06,1.92,NA,NA,1609,485,NA,NA,0,2016-07-13 07:00:00,2016-07-13,22,1
		49,"Subject 11",1,"0111",2016-07-13 07:55:53,85.3138,65.3752,0.4,0.766,0,1.92,NA,NA,534,33,NA,NA,0,2016-07-13 07:00:00,2016-07-13,22,1
		50,"Subject 11",1,"0111",2016-07-13 08:23:53,86.8186,70.3912,0.4,0.811,0.06,1.98,NA,NA,173,23,NA,NA,0,2016-07-13 08:00:00,2016-07-13,23,1
		51,"Subject 11",1,"0111",2016-07-13 08:51:53,86.526,71.896,0.4,0.831,0.05,2.03,NA,NA,1070,123,NA,NA,0,2016-07-13 08:00:00,2016-07-13,23,1
		52,"Subject 11",1,"0111",2016-07-13 09:19:53,87.5292,72.4394,0.4,0.827,0.12,2.15,NA,NA,1141,101,NA,NA,0,2016-07-13 09:00:00,2016-07-13,24,1
		53,"Subject 11",1,"0111",2016-07-13 09:47:53,88.3234,74.3622,0.4,0.842,0.03,2.18,NA,NA,555,161,NA,NA,0,2016-07-13 09:00:00,2016-07-13,24,1
		54,"Subject 11",1,"0111",2016-07-13 10:15:53,100.947,88.3234,0.5,0.875,0.1,2.28,NA,NA,1308,360,NA,NA,0,2016-07-13 10:00:00,2016-07-13,25,1
		55,"Subject 11",1,"0111",2016-07-13 10:43:53,103.5804,81.8862,0.5,0.791,0.12,2.4,NA,NA,795,82,NA,NA,0,2016-07-13 10:00:00,2016-07-13,25,1
		56,"Subject 11",1,"0111",2016-07-13 11:11:53,87.2784,73.3172,0.4,0.84,0.01,2.41,NA,NA,778,164,NA,NA,0,2016-07-13 11:00:00,2016-07-13,26,1
		57,"Subject 11",1,"0111",2016-07-13 11:39:53,94.9278,75.1564,0.5,0.792,0.04,2.45,NA,NA,382,45,NA,NA,0,2016-07-13 11:00:00,2016-07-13,26,1
		58,"Subject 11",1,"0111",2016-07-13 12:07:53,91.124,70.851,0.4,0.778,0,2.45,NA,NA,1984,161,NA,NA,0,2016-07-13 12:00:00,2016-07-13,27,1
		59,"Subject 11",1,"0111",2016-07-13 12:35:53,83.9762,70.6838,0.4,0.841,0.06,2.51,NA,NA,763,167,NA,NA,0,2016-07-13 12:00:00,2016-07-13,27,1
		60,"Subject 11",1,"0111",2016-07-13 13:03:53,84.5196,67.5906,0.4,0.8,0,2.51,NA,NA,355,17,NA,NA,0,2016-07-13 13:00:00,2016-07-13,28,1
		61,"Subject 11",1,"0111",2016-07-13 13:31:53,88.407,73.4008,0.4,0.83,0.05,2.56,NA,NA,426,81,NA,NA,0,2016-07-13 13:00:00,2016-07-13,28,1
		62,"Subject 11",1,"0111",2016-07-13 13:59:53,106.5064,89.3266,0.5,0.839,0.05,2.61,NA,NA,1163,252,NA,NA,0,2016-07-13 13:00:00,2016-07-13,28,1
		63,"Subject 11",1,"0111",2016-07-13 14:27:53,104.0402,81.4264,0.5,0.782,0,2.61,NA,NA,2083,966,NA,NA,0,2016-07-13 14:00:00,2016-07-13,29,1
		64,"Subject 11",1,"0111",2016-07-13 14:55:53,73.5262,55.4268,0.3,0.754,-0.02,2.59,NA,NA,1246,350,NA,NA,0,2016-07-13 14:00:00,2016-07-13,29,1
		65,"Subject 11",1,"0111",2016-07-13 15:23:53,98.1046,73.568,0.5,0.75,0.01,2.6,NA,NA,263,52,NA,NA,0,2016-07-13 15:00:00,2016-07-13,30,1
		66,"Subject 11",1,"0111",2016-07-13 15:51:53,94.0918,70.8092,0.4,0.752,0,2.6,NA,NA,229,50,NA,NA,0,2016-07-13 15:00:00,2016-07-13,30,1
		67,"Subject 11",1,"0111",2016-07-13 16:19:53,94.5098,71.3108,0.4,0.755,0,2.6,NA,NA,587,144,NA,NA,0,2016-07-13 16:00:00,2016-07-13,31,1
		68,"Subject 11",1,"0111",2016-07-13 16:47:53,93.214,69.6806,0.4,0.747,0,2.6,NA,NA,576,45,NA,NA,0,2016-07-13 16:00:00,2016-07-13,31,1
		69,"Subject 11",1,"0111",2016-07-13 17:15:53,102.8698,76.912,0.5,0.748,0,2.6,NA,NA,268,44,NA,NA,0,2016-07-13 17:00:00,2016-07-13,32,1
		70,"Subject 11",1,"0111",2016-07-13 17:43:53,95.9728,71.8124,0.5,0.748,0.01,2.61,NA,NA,957,95,NA,NA,0,2016-07-13 17:00:00,2016-07-13,32,1
		71,"Subject 11",1,"0111",2016-07-13 18:11:53,95.722,72.9828,0.5,0.762,0,2.61,NA,NA,357,17,NA,NA,0,2016-07-13 18:00:00,2016-07-13,33,1
		72,"Subject 11",1,"0111",2016-07-13 18:39:53,98.021,72.8574,0.5,0.743,0,2.61,NA,NA,1871,371,NA,NA,0,2016-07-13 18:00:00,2016-07-13,33,1
		73,"Subject 11",1,"0111",2016-07-13 19:07:53,106.0048,78.6676,0.5,0.742,0,2.61,NA,NA,1533,300,NA,NA,0,2016-07-13 19:00:00,2016-07-13,34,1
		74,"Subject 11",1,"0111",2016-07-13 19:35:53,108.0948,82.6804,0.5,0.765,0.02,2.63,NA,NA,1226,297,NA,NA,0,2016-07-13 19:00:00,2016-07-13,34,1
		75,"Subject 11",1,"0111",2016-07-13 20:03:53,103.2878,81.8444,0.5,0.793,0.07,2.7,NA,NA,795,213,NA,NA,0,2016-07-13 20:00:00,2016-07-13,35,1
		76,"Subject 11",1,"0111",2016-07-13 20:31:53,108.889,85.3974,0.5,0.784,0.04,2.74,NA,NA,2664,747,NA,NA,0,2016-07-13 20:00:00,2016-07-13,35,1
		77,"Subject 11",1,"0111",2016-07-13 20:59:53,102.5772,77.8316,0.5,0.759,0,2.74,NA,NA,258,44,NA,NA,0,2016-07-13 20:00:00,2016-07-13,35,1
		78,"Subject 11",1,"0111",2016-07-13 21:27:53,104.3746,81.4264,0.5,0.78,0.11,2.85,NA,NA,960,153,NA,NA,0,2016-07-13 21:00:00,2016-07-13,36,1
		79,"Subject 11",1,"0111",2016-07-13 21:55:53,102.0756,79.002,0.5,0.774,0,2.85,NA,NA,396,88,NA,NA,0,2016-07-13 21:00:00,2016-07-13,36,1
		80,"Subject 11",1,"0111",2016-07-13 22:23:53,102.2846,80.1724,0.5,0.784,0.04,2.89,NA,NA,1345,458,NA,NA,0,2016-07-13 22:00:00,2016-07-13,37,1
		81,"Subject 11",1,"0111",2016-07-13 22:51:53,100.738,75.9924,0.5,0.754,0,2.89,NA,NA,954,273,NA,NA,0,2016-07-13 22:00:00,2016-07-13,37,1
		82,"Subject 11",1,"0111",2016-07-13 23:19:53,103.7476,77.957,0.5,0.751,0,2.89,NA,NA,921,396,NA,NA,0,2016-07-13 23:00:00,2016-07-13,38,1
		83,"Subject 11",1,"0111",2016-07-13 23:47:53,103.664,77.9988,0.5,0.752,0,2.89,NA,NA,880,280,NA,NA,0,2016-07-13 23:00:00,2016-07-13,38,1
		84,"Subject 11",1,"0111",2016-07-14 00:15:53,101.992,76.8702,0.5,0.754,0,2.89,NA,NA,449,97,NA,NA,0,2016-07-14 00:00:00,2016-07-14,39,2
		85,"Subject 11",1,"0111",2016-07-14 00:43:53,97.812,73.4426,0.5,0.751,0.01,2.9,NA,NA,875,242,NA,NA,0,2016-07-14 00:00:00,2016-07-14,39,2
		86,"Subject 11",1,"0111",2016-07-14 01:11:53,111.1462,83.9344,0.5,0.755,-0.01,2.89,NA,NA,964,284,NA,NA,0,2016-07-14 01:00:00,2016-07-14,40,2
		87,"Subject 11",1,"0111",2016-07-14 01:39:53,108.6382,82.3042,0.5,0.758,0.01,2.9,NA,NA,562,126,NA,NA,0,2016-07-14 01:00:00,2016-07-14,40,2
		88,"Subject 11",1,"0111",2016-07-14 02:07:53,106.0884,79.9216,0.5,0.753,0,2.9,NA,NA,601,263,NA,NA,0,2016-07-14 02:00:00,2016-07-14,41,2
		89,"Subject 11",1,"0111",2016-07-14 02:35:53,102.2846,75.9506,0.5,0.742,0,2.9,NA,NA,868,209,NA,NA,0,2016-07-14 02:00:00,2016-07-14,41,2
		90,"Subject 11",1,"0111",2016-07-14 03:03:53,106.172,78.584,0.5,0.74,0,2.9,NA,NA,575,165,NA,NA,0,2016-07-14 03:00:00,2016-07-14,42,2
		91,"Subject 11",1,"0111",2016-07-14 03:31:53,98.0628,72.1468,0.5,0.736,0,2.9,NA,NA,570,96,NA,NA,0,2016-07-14 03:00:00,2016-07-14,42,2
		92,"Subject 11",1,"0111",2016-07-14 03:59:53,99.8602,73.6516,0.5,0.737,0,2.9,NA,NA,421,53,NA,NA,0,2016-07-14 03:00:00,2016-07-14,42,2
		93,"Subject 11",1,"0111",2016-07-14 04:27:53,109.4742,80.2142,0.5,0.732,0,2.9,NA,NA,897,231,NA,NA,0,2016-07-14 04:00:00,2016-07-14,43,2
		94,"Subject 11",1,"0111",2016-07-14 04:55:53,101.5322,74.613,0.5,0.735,0,2.9,NA,NA,580,68,NA,NA,0,2016-07-14 04:00:00,2016-07-14,43,2
		95,"Subject 11",1,"0111",2016-07-14 05:23:53,102.9116,75.1982,0.5,0.731,0,2.9,NA,NA,841,191,NA,NA,0,2016-07-14 05:00:00,2016-07-14,44,2
		96,"Subject 11",1,"0111",2016-07-14 05:51:53,99.6094,73.0246,0.5,0.733,0,2.9,NA,NA,446,48,NA,NA,0,2016-07-14 05:00:00,2016-07-14,44,2
		97,"Subject 11",1,"0111",2016-07-14 06:19:53,99.6512,73.3172,0.5,0.736,0,2.9,NA,NA,1104,189,NA,NA,0,2016-07-14 06:00:00,2016-07-14,45,2
		98,"Subject 11",1,"0111",2016-07-14 06:47:53,97.6448,72.6902,0.5,0.744,0.01,2.91,NA,NA,550,80,NA,NA,0,2016-07-14 06:00:00,2016-07-14,45,2
		99,"Subject 11",1,"0111",2016-07-14 07:15:53,94.1754,70.3912,0.4,0.748,0,2.91,NA,NA,536,71,NA,NA,0,2016-07-14 07:00:00,2016-07-14,46,2
		100,"Subject 11",1,"0111",2016-07-14 07:43:53,91.4584,68.134,0.4,0.745,0,2.91,NA,NA,38,0,NA,NA,0,2016-07-14 07:00:00,2016-07-14,46,2
		101,"Subject 11",1,"0111",2016-07-14 08:11:53,91.6256,68.3848,0.4,0.746,0,2.91,NA,NA,999,185,NA,NA,0,2016-07-14 08:00:00,2016-07-14,47,2
		102,"Subject 11",1,"0111",2016-07-14 08:39:53,98.439,73.1082,0.5,0.743,0,2.91,NA,NA,1136,183,NA,NA,0,2016-07-14 08:00:00,2016-07-14,47,2
		103,"Subject 11",1,"0111",2016-07-14 09:07:53,97.5194,72.5648,0.5,0.744,0,2.91,NA,NA,1241,416,NA,NA,0,2016-07-14 09:00:00,2016-07-14,48,2
		104,"Subject 11",1,"0111",2016-07-14 09:35:53,92.1272,68.1758,0.4,0.74,0,2.91,NA,NA,400,2,NA,NA,0,2016-07-14 09:00:00,2016-07-14,48,2
		105,"Subject 11",1,"0111",2016-07-14 10:03:53,103.455,76.6194,0.5,0.74,0,2.91,NA,NA,1521,361,NA,NA,0,2016-07-14 10:00:00,2016-07-14,49,2
		106,"Subject 11",1,"0111",2016-07-14 10:31:53,88.1562,64.2466,0.4,0.729,0,2.91,NA,NA,1013,162,NA,NA,0,2016-07-14 10:00:00,2016-07-14,49,2
		107,"Subject 11",1,"0111",2016-07-14 10:59:53,92.9632,68.4266,0.4,0.736,0,2.91,NA,NA,307,13,NA,NA,0,2016-07-14 10:00:00,2016-07-14,49,2
		108,"Subject 11",1,"0111",2016-07-14 11:27:53,101.6576,74.7802,0.5,0.736,0,2.91,NA,NA,1112,223,NA,NA,0,2016-07-14 11:00:00,2016-07-14,50,2
		109,"Subject 11",1,"0111",2016-07-14 11:55:53,94.8024,70.6838,0.4,0.746,0.02,2.93,NA,NA,1549,451,NA,NA,0,2016-07-14 11:00:00,2016-07-14,50,2
		110,"Subject 11",1,"0111",2016-07-14 12:23:53,94.8024,70.3494,0.4,0.742,0,2.93,NA,NA,469,48,NA,NA,0,2016-07-14 12:00:00,2016-07-14,51,2
		111,"Subject 11",1,"0111",2016-07-14 12:51:53,90.9568,67.5906,0.4,0.743,0,2.93,NA,NA,962,149,NA,NA,0,2016-07-14 12:00:00,2016-07-14,51,2
		112,"Subject 11",1,"0111",2016-07-14 13:19:53,93.2976,70.851,0.4,0.759,0,2.93,NA,NA,351,54,NA,NA,0,2016-07-14 13:00:00,2016-07-14,52,2
		113,"Subject 11",1,"0111",2016-07-14 13:47:53,49.7838,33.7326,0.2,0.678,0,2.93,NA,NA,1656,562,NA,NA,0,2016-07-14 13:00:00,2016-07-14,52,2
		114,"Subject 11",1,"0111",2016-07-14 14:15:53,105.0852,77.8316,0.5,0.74,0,2.93,NA,NA,356,36,NA,NA,0,2016-07-14 14:00:00,2016-07-14,53,2
		115,"Subject 11",1,"0111",2016-07-14 14:43:53,92.5034,68.6356,0.4,0.742,0,2.93,NA,NA,247,33,NA,NA,0,2016-07-14 14:00:00,2016-07-14,53,2
		116,"Subject 11",1,"0111",2016-07-14 15:11:53,93.2976,68.2594,0.4,0.732,0,2.93,NA,NA,213,0,NA,NA,0,2016-07-14 15:00:00,2016-07-14,54,2
		117,"Subject 11",1,"0111",2016-07-14 15:39:53,93.0468,68.3012,0.4,0.734,0,2.93,NA,NA,107,13,NA,NA,0,2016-07-14 15:00:00,2016-07-14,54,2
		118,"Subject 11",1,"0111",2016-07-14 16:07:53,94.259,68.4266,0.4,0.726,0,2.93,NA,NA,341,24,NA,NA,0,2016-07-14 16:00:00,2016-07-14,55,2
		119,"Subject 11",1,"0111",2016-07-14 16:35:53,97.0178,71.3944,0.5,0.736,0.01,2.94,NA,NA,711,25,NA,NA,0,2016-07-14 16:00:00,2016-07-14,55,2
		120,"Subject 11",1,"0111",2016-07-14 17:03:53,93.5066,68.134,0.4,0.729,0,2.94,NA,NA,125,3,NA,NA,0,2016-07-14 17:00:00,2016-07-14,56,2
		121,"Subject 11",1,"0111",2016-07-14 17:31:53,100.1946,73.9442,0.5,0.738,0,2.94,NA,NA,578,61,NA,NA,0,2016-07-14 17:00:00,2016-07-14,56,2
		122,"Subject 11",1,"0111",2016-07-14 17:59:53,96.6834,70.1822,0.5,0.726,0,2.94,NA,NA,1304,40,NA,NA,0,2016-07-14 17:00:00,2016-07-14,56,2
		123,"Subject 11",1,"0111",2016-07-14 18:27:53,95.1786,70.1404,0.4,0.737,0,2.94,NA,NA,12,0,NA,NA,0,2016-07-14 18:00:00,2016-07-14,57,2
		124,"Subject 11",1,"0111",2016-07-14 18:55:53,111.188,83.5164,0.5,0.751,0,2.94,NA,NA,1448,241,NA,NA,0,2016-07-14 18:00:00,2016-07-14,57,2
		125,"Subject 11",1,"0111",2016-07-14 19:23:53,118.7956,88.2398,0.6,0.743,0,2.94,NA,NA,1474,418,NA,NA,0,2016-07-14 19:00:00,2016-07-14,58,2
		126,"Subject 11",1,"0111",2016-07-14 19:51:53,102.2428,74.2368,0.5,0.726,0,2.94,NA,NA,116,14,NA,NA,0,2016-07-14 19:00:00,2016-07-14,58,2
		127,"Subject 11",1,"0111",2016-07-14 20:19:53,125.3164,94.9278,0.6,0.757,0.04,2.98,NA,NA,2336,807,NA,NA,0,2016-07-14 20:00:00,2016-07-14,59,2
		128,"Subject 11",1,"0111",2016-07-14 20:47:53,124.7312,93.841,0.6,0.752,0.01,2.99,NA,NA,2667,780,NA,NA,0,2016-07-14 20:00:00,2016-07-14,59,2
		129,"Subject 11",1,"0111",2016-07-14 21:15:53,119.0464,85.4392,0.6,0.718,0,2.99,NA,NA,2687,469,NA,NA,0,2016-07-14 21:00:00,2016-07-14,60,2
		130,"Subject 11",1,"0111",2016-07-14 21:43:53,101.8248,75.1564,0.5,0.738,0,2.99,NA,NA,174,12,NA,NA,0,2016-07-14 21:00:00,2016-07-14,60,2
		131,"Subject 11",1,"0111",2016-07-14 22:11:53,101.4486,73.15,0.5,0.721,0,2.99,NA,NA,759,91,NA,NA,0,2016-07-14 22:00:00,2016-07-14,61,2
		132,"Subject 11",1,"0111",2016-07-14 22:39:53,128.535,95.095,0.6,0.74,0.02,3.01,NA,NA,1611,735,NA,NA,0,2016-07-14 22:00:00,2016-07-14,61,2
		133,"Subject 11",1,"0111",2016-07-14 23:07:53,106.0048,80.1306,0.5,0.756,0.07,3.08,NA,NA,1183,260,NA,NA,0,2016-07-14 23:00:00,2016-07-14,62,2
		134,"Subject 11",1,"0111",2016-07-14 23:35:53,101.574,75.9088,0.5,0.747,0.01,3.09,NA,NA,556,26,NA,NA,0,2016-07-14 23:00:00,2016-07-14,62,2
		135,"Subject 11",1,"0111",2016-07-15 00:03:53,123.6026,90.2462,0.6,0.73,0,3.09,NA,NA,2728,769,NA,NA,0,2016-07-15 00:00:00,2016-07-15,63,3
		136,"Subject 11",1,"0111",2016-07-15 00:31:53,123.937,90.5388,0.6,0.73,0,3.09,NA,NA,3143,1104,NA,NA,0,2016-07-15 00:00:00,2016-07-15,63,3
		137,"Subject 11",1,"0111",2016-07-15 00:59:53,108.3456,79.629,0.5,0.735,0.02,3.11,NA,NA,2328,804,NA,NA,0,2016-07-15 00:00:00,2016-07-15,63,3
		138,"Subject 11",1,"0111",2016-07-15 01:27:53,104.8344,77.121,0.5,0.736,0,3.11,NA,NA,158,39,NA,NA,0,2016-07-15 01:00:00,2016-07-15,64,3
		139,"Subject 11",1,"0111",2016-07-15 01:55:53,99.2332,71.8124,0.5,0.723,0,3.11,NA,NA,336,115,NA,NA,0,2016-07-15 01:00:00,2016-07-15,64,3
		140,"Subject 11",1,"0111",2016-07-15 02:23:53,119.7988,88.1562,0.6,0.736,0.01,3.12,NA,NA,2600,630,NA,NA,0,2016-07-15 02:00:00,2016-07-15,65,3
		141,"Subject 11",1,"0111",2016-07-15 02:51:53,102.9534,75.3236,0.5,0.732,-0.01,3.11,NA,NA,831,143,NA,NA,0,2016-07-15 02:00:00,2016-07-15,65,3
		142,"Subject 11",1,"0111",2016-07-15 03:19:53,102.3682,75.1146,0.5,0.734,0.01,3.12,NA,NA,720,85,NA,NA,0,2016-07-15 03:00:00,2016-07-15,66,3
		143,"Subject 11",1,"0111",2016-07-15 03:47:53,97.9792,72.2722,0.5,0.738,-0.01,3.11,NA,NA,703,64,NA,NA,0,2016-07-15 03:00:00,2016-07-15,66,3
		144,"Subject 11",1,"0111",2016-07-15 04:15:53,109.725,79.4618,0.5,0.724,0,3.11,NA,NA,1457,298,NA,NA,0,2016-07-15 04:00:00,2016-07-15,67,3
		145,"Subject 11",1,"0111",2016-07-15 04:43:53,94.9278,68.761,0.4,0.724,0.01,3.12,NA,NA,1370,204,NA,NA,0,2016-07-15 04:00:00,2016-07-15,67,3
		146,"Subject 11",1,"0111",2016-07-15 05:11:53,119.2136,89.8282,0.6,0.754,0.02,3.14,NA,NA,2741,325,NA,NA,0,2016-07-15 05:00:00,2016-07-15,68,3
		147,"Subject 11",1,"0111",2016-07-15 05:39:53,125.0656,92.7124,0.6,0.741,0.01,3.15,NA,NA,4911,2233,NA,NA,0,2016-07-15 05:00:00,2016-07-15,68,3
		148,"Subject 11",1,"0111",2016-07-15 06:07:53,118.3776,87.2784,0.6,0.737,0,3.15,NA,NA,3191,769,NA,NA,0,2016-07-15 06:00:00,2016-07-15,69,3
		149,"Subject 11",1,"0111",2016-07-15 06:35:53,93.1722,68.7192,0.4,0.738,0,3.15,NA,NA,492,40,NA,NA,0,2016-07-15 06:00:00,2016-07-15,69,3
		150,"Subject 11",1,"0111",2016-07-15 07:03:53,86.0662,62.0312,0.4,0.721,0,3.15,NA,NA,271,59,NA,NA,0,2016-07-15 07:00:00,2016-07-15,70,3
		151,"Subject 11",1,"0111",2016-07-15 07:31:53,92.2526,66.9218,0.4,0.725,0.01,3.16,NA,NA,1276,186,NA,NA,0,2016-07-15 07:00:00,2016-07-15,70,3
		152,"Subject 11",1,"0111",2016-07-15 07:59:53,85.2302,61.5714,0.4,0.722,0,3.16,NA,NA,321,46,NA,NA,0,2016-07-15 07:00:00,2016-07-15,70,3
		153,"Subject 11",1,"0111",2016-07-15 08:27:53,103.3714,77.3718,0.5,0.749,0,3.16,NA,NA,1260,159,NA,NA,0,2016-07-15 08:00:00,2016-07-15,71,3
		154,"Subject 11",1,"0111",2016-07-15 08:55:53,90.3298,66.8382,0.4,0.74,0.03,3.19,NA,NA,1407,404,NA,NA,0,2016-07-15 08:00:00,2016-07-15,71,3
		155,"Subject 11",1,"0111",2016-07-15 09:23:53,84.645,63.4524,0.4,0.75,0,3.19,NA,NA,1012,40,NA,NA,0,2016-07-15 09:00:00,2016-07-15,72,3
		156,"Subject 11",1,"0111",2016-07-15 09:51:53,85.2302,63.118,0.4,0.741,0.01,3.2,NA,NA,352,45,NA,NA,0,2016-07-15 09:00:00,2016-07-15,72,3
		157,"Subject 11",1,"0111",2016-07-15 10:19:53,102.7026,77.2046,0.5,0.752,0,3.2,NA,NA,815,144,NA,NA,0,2016-07-15 10:00:00,2016-07-15,73,3
		158,"Subject 11",1,"0111",2016-07-15 10:47:53,87.6128,64.9572,0.4,0.741,0,3.2,NA,NA,1136,195,NA,NA,0,2016-07-15 10:00:00,2016-07-15,73,3
		159,"Subject 11",1,"0111",2016-07-15 11:15:53,123.937,90.3298,0.6,0.729,0,3.2,NA,NA,1204,468,NA,NA,0,2016-07-15 11:00:00,2016-07-15,74,3
		160,"Subject 11",1,"0111",2016-07-15 11:43:53,93.841,71.1018,0.4,0.758,-0.01,3.19,NA,NA,892,161,NA,NA,0,2016-07-15 11:00:00,2016-07-15,74,3
		161,"Subject 11",1,"0111",2016-07-15 12:11:53,91.333,67.0054,0.4,0.734,0,3.19,NA,NA,490,86,NA,NA,0,2016-07-15 12:00:00,2016-07-15,75,3
		162,"Subject 11",1,"0111",2016-07-15 12:39:53,51.2886,35.112,0.2,0.684,0,3.19,NA,NA,830,306,NA,NA,0,2016-07-15 12:00:00,2016-07-15,75,3
		163,"Subject 11",1,"0111",2016-07-15 13:07:53,103.5804,76.4104,0.5,0.738,0,3.19,NA,NA,230,15,NA,NA,0,2016-07-15 13:00:00,2016-07-15,76,3
		164,"Subject 11",1,"0111",2016-07-15 13:35:53,94.7188,68.6356,0.4,0.725,0,3.19,NA,NA,328,34,NA,NA,0,2016-07-15 13:00:00,2016-07-15,76,3
		165,"Subject 11",1,"0111",2016-07-15 14:03:53,97.812,72.0214,0.5,0.736,0,3.19,NA,NA,419,67,NA,NA,0,2016-07-15 14:00:00,2016-07-15,77,3
		166,"Subject 11",1,"0111",2016-07-15 14:31:53,91.4584,66.5456,0.4,0.728,0,3.19,NA,NA,257,43,NA,NA,0,2016-07-15 14:00:00,2016-07-15,77,3
		167,"Subject 11",1,"0111",2016-07-15 14:59:53,91.542,67.4234,0.4,0.737,0,3.19,NA,NA,306,43,NA,NA,0,2016-07-15 14:00:00,2016-07-15,77,3
		168,"Subject 11",1,"0111",2016-07-15 15:27:53,88.6996,65.5424,0.4,0.739,0,3.19,NA,NA,245,47,NA,NA,0,2016-07-15 15:00:00,2016-07-15,78,3
		169,"Subject 11",1,"0111",2016-07-15 15:55:53,91.8764,66.2112,0.4,0.721,0,3.19,NA,NA,1463,28,NA,NA,0,2016-07-15 15:00:00,2016-07-15,78,3
		170,"Subject 11",1,"0111",2016-07-15 16:23:53,89.7028,66.4202,0.4,0.74,0.01,3.2,NA,NA,557,21,NA,NA,0,2016-07-15 16:00:00,2016-07-15,79,3
		171,"Subject 11",1,"0111",2016-07-15 16:51:53,86.3588,64.163,0.4,0.743,0,3.2,NA,NA,432,34,NA,NA,0,2016-07-15 16:00:00,2016-07-15,79,3
		172,"Subject 11",1,"0111",2016-07-15 17:19:53,91.2076,66.5038,0.4,0.729,0,3.2,NA,NA,458,31,NA,NA,0,2016-07-15 17:00:00,2016-07-15,80,3
		173,"Subject 11",1,"0111",2016-07-15 17:47:53,112.5256,84.1016,0.5,0.747,0.03,3.23,NA,NA,2094,275,NA,NA,0,2016-07-15 17:00:00,2016-07-15,80,3
		174,"Subject 11",1,"0111",2016-07-15 18:15:53,91.2912,67.5906,0.4,0.74,0,3.23,NA,NA,316,40,NA,NA,0,2016-07-15 18:00:00,2016-07-15,81,3
		175,"Subject 11",1,"0111",2016-07-15 18:43:53,112.7346,84.6868,0.5,0.751,-0.01,3.22,NA,NA,1165,118,NA,NA,0,2016-07-15 18:00:00,2016-07-15,81,3
		176,"Subject 11",1,"0111",2016-07-15 19:11:53,97.812,72.3976,0.5,0.74,0.07,3.29,NA,NA,3510,1543,NA,NA,0,2016-07-15 19:00:00,2016-07-15,82,3
		177,"Subject 11",1,"0111",2016-07-15 19:39:53,114.95,86.1916,0.5,0.75,0.04,3.33,NA,NA,826,147,NA,NA,0,2016-07-15 19:00:00,2016-07-15,82,3
		178,"Subject 11",1,"0111",2016-07-15 20:07:53,101.4904,74.2786,0.5,0.732,0.02,3.35,NA,NA,3008,1172,NA,NA,0,2016-07-15 20:00:00,2016-07-15,83,3
		179,"Subject 11",1,"0111",2016-07-15 20:35:53,99.0242,72.732,0.5,0.735,0,3.35,NA,NA,450,23,NA,NA,0,2016-07-15 20:00:00,2016-07-15,83,3
		180,"Subject 11",1,"0111",2016-07-15 21:03:53,100.738,73.4426,0.5,0.729,0,3.35,NA,NA,349,49,NA,NA,0,2016-07-15 21:00:00,2016-07-15,84,3
		181,"Subject 11",1,"0111",2016-07-15 21:31:53,115.6188,87.571,0.5,0.758,0.09,3.44,NA,NA,3468,1347,NA,NA,0,2016-07-15 21:00:00,2016-07-15,84,3
		182,"Subject 11",1,"0111",2016-07-15 21:59:53,97.6866,73.359,0.5,0.751,0,3.44,NA,NA,302,61,NA,NA,0,2016-07-15 21:00:00,2016-07-15,84,3
		183,"Subject 11",1,"0111",2016-07-15 22:27:53,96.2236,70.0568,0.5,0.728,0,3.44,NA,NA,655,74,NA,NA,0,2016-07-15 22:00:00,2016-07-15,85,3
		184,"Subject 11",1,"0111",2016-07-15 22:55:53,126.1942,94.677,0.6,0.75,0.08,3.52,NA,NA,2721,1004,NA,NA,0,2016-07-15 22:00:00,2016-07-15,85,3
		185,"Subject 11",1,"0111",2016-07-15 23:23:53,96.3908,71.3526,0.5,0.74,0,3.52,NA,NA,833,159,NA,NA,0,2016-07-15 23:00:00,2016-07-15,86,3
		186,"Subject 11",1,"0111",2016-07-15 23:51:53,90.8314,66.671,0.4,0.734,0,3.52,NA,NA,596,41,NA,NA,0,2016-07-15 23:00:00,2016-07-15,86,3
		187,"Subject 11",1,"0111",2016-07-16 00:19:53,112.5674,84.2688,0.5,0.748,0,3.52,NA,NA,1000,186,NA,NA,0,2016-07-16 00:00:00,2016-07-16,87,4
		188,"Subject 11",1,"0111",2016-07-16 00:47:53,95.8056,69.7224,0.5,0.727,0.01,3.53,NA,NA,595,121,NA,NA,0,2016-07-16 00:00:00,2016-07-16,87,4
		189,"Subject 11",1,"0111",2016-07-16 01:15:53,94.3844,69.5134,0.4,0.737,0.03,3.56,NA,NA,1749,231,NA,NA,0,2016-07-16 01:00:00,2016-07-16,88,4
		190,"Subject 11",1,"0111",2016-07-16 01:43:53,89.7028,65.7096,0.4,0.733,0.01,3.57,NA,NA,453,71,NA,NA,0,2016-07-16 01:00:00,2016-07-16,88,4
		191,"Subject 11",1,"0111",2016-07-16 02:11:53,99.2332,72.6484,0.5,0.732,0.04,3.61,NA,NA,552,74,NA,NA,0,2016-07-16 02:00:00,2016-07-16,89,4
		192,"Subject 11",1,"0111",2016-07-16 02:39:53,94.677,70.9764,0.4,0.75,0.01,3.62,NA,NA,1421,271,NA,NA,0,2016-07-16 02:00:00,2016-07-16,89,4
		193,"Subject 11",1,"0111",2016-07-16 03:07:53,89.8282,66.5038,0.4,0.74,0,3.62,NA,NA,479,108,NA,NA,0,2016-07-16 03:00:00,2016-07-16,90,4
		194,"Subject 11",1,"0111",2016-07-16 03:35:53,94.0918,69.179,0.4,0.735,0,3.62,NA,NA,772,43,NA,NA,0,2016-07-16 03:00:00,2016-07-16,90,4
		195,"Subject 11",1,"0111",2016-07-16 04:03:53,116.4548,85.7318,0.5,0.736,0.03,3.65,NA,NA,2067,574,NA,NA,0,2016-07-16 04:00:00,2016-07-16,91,4
		196,"Subject 11",1,"0111",2016-07-16 04:31:53,92.7542,68.343,0.4,0.737,0,3.65,NA,NA,325,69,NA,NA,0,2016-07-16 04:00:00,2016-07-16,91,4
		197,"Subject 11",1,"0111",2016-07-16 04:59:53,125.7344,96.6416,0.6,0.769,0.09,3.74,NA,NA,3464,1596,NA,NA,0,2016-07-16 04:00:00,2016-07-16,91,4
		198,"Subject 11",1,"0111",2016-07-16 05:27:53,89.2848,66.7128,0.4,0.747,0,3.74,NA,NA,2043,405,NA,NA,0,2016-07-16 05:00:00,2016-07-16,92,4
		199,"Subject 11",1,"0111",2016-07-16 05:55:53,90.288,66.2948,0.4,0.734,0.01,3.75,NA,NA,394,66,NA,NA,0,2016-07-16 05:00:00,2016-07-16,92,4
		200,"Subject 11",1,"0111",2016-07-16 06:23:53,86.4006,62.8254,0.4,0.727,0.01,3.76,NA,NA,1222,265,NA,NA,0,2016-07-16 06:00:00,2016-07-16,93,4
		201,"Subject 11",1,"0111",2016-07-16 06:51:53,102.0756,78.584,0.5,0.77,0,3.76,NA,NA,1111,192,NA,NA,0,2016-07-16 06:00:00,2016-07-16,93,4
		202,"Subject 11",1,"0111",2016-07-16 07:19:53,87.8218,65.5006,0.4,0.746,0,3.76,NA,NA,932,183,NA,NA,0,2016-07-16 07:00:00,2016-07-16,94,4
		203,"Subject 11",1,"0111",2016-07-16 07:47:53,84.3524,62.9926,0.4,0.747,0,3.76,NA,NA,224,46,NA,NA,0,2016-07-16 07:00:00,2016-07-16,94,4
		204,"Subject 11",1,"0111",2016-07-16 08:15:53,82.555,61.5296,0.4,0.745,0,3.76,NA,NA,467,146,NA,NA,0,2016-07-16 08:00:00,2016-07-16,95,4
		205,"Subject 11",1,"0111",2016-07-16 08:43:53,101.5322,80.6322,0.5,0.794,0.06,3.82,NA,NA,3287,934,NA,NA,0,2016-07-16 08:00:00,2016-07-16,95,4
		206,"Subject 11",1,"0111",2016-07-16 09:11:53,79.4618,59.983,0.4,0.755,0,3.82,NA,NA,1245,111,NA,NA,0,2016-07-16 09:00:00,2016-07-16,96,4
		207,"Subject 11",1,"0111",2016-07-16 09:39:53,85.481,64.0794,0.4,0.75,-0.01,3.81,NA,NA,344,84,NA,NA,0,2016-07-16 09:00:00,2016-07-16,96,4
		208,"Subject 11",1,"0111",2016-07-16 10:07:53,84.5196,62.9926,0.4,0.745,0.01,3.82,NA,NA,586,96,NA,NA,0,2016-07-16 10:00:00,2016-07-16,97,4
		209,"Subject 11",1,"0111",2016-07-16 10:35:53,82.7222,61.7386,0.4,0.746,0,3.82,NA,NA,318,48,NA,NA,0,2016-07-16 10:00:00,2016-07-16,97,4
		210,"Subject 11",1,"0111",2016-07-16 11:03:53,88.3652,65.9186,0.4,0.746,0,3.82,NA,NA,1043,36,NA,NA,0,2016-07-16 11:00:00,2016-07-16,98,4
		211,"Subject 11",1,"0111",2016-07-16 11:31:53,89.1594,66.5456,0.4,0.747,0.01,3.83,NA,NA,658,51,NA,NA,0,2016-07-16 11:00:00,2016-07-16,98,4
		212,"Subject 11",1,"0111",2016-07-16 11:59:53,82.3878,61.4042,0.4,0.745,0,3.83,NA,NA,138,26,NA,NA,0,2016-07-16 11:00:00,2016-07-16,98,4
		213,"Subject 11",1,"0111",2016-07-16 12:27:53,39.292,25.8324,0.2,0.657,0,3.83,NA,NA,727,318,NA,NA,0,2016-07-16 12:00:00,2016-07-16,99,4
		214,"Subject 11",1,"0111",2016-07-16 12:55:53,96.5162,71.2272,0.5,0.738,0,3.83,NA,NA,966,33,NA,NA,0,2016-07-16 12:00:00,2016-07-16,99,4
		215,"Subject 11",1,"0111",2016-07-16 13:23:53,85.9826,62.8254,0.4,0.731,0,3.83,NA,NA,1464,83,NA,NA,0,2016-07-16 13:00:00,2016-07-16,100,4
		216,"Subject 11",1,"0111",2016-07-16 13:51:53,82.764,61.2788,0.4,0.74,0,3.83,NA,NA,926,158,NA,NA,0,2016-07-16 13:00:00,2016-07-16,100,4
		217,"Subject 11",1,"0111",2016-07-16 14:19:53,84.6032,62.5328,0.4,0.739,0,3.83,NA,NA,669,59,NA,NA,0,2016-07-16 14:00:00,2016-07-16,101,4
		218,"Subject 11",1,"0111",2016-07-16 14:47:53,83.9344,61.9476,0.4,0.738,0,3.83,NA,NA,943,150,NA,NA,0,2016-07-16 14:00:00,2016-07-16,101,4
		219,"Subject 11",1,"0111",2016-07-16 15:15:53,84.5614,63.118,0.4,0.746,0,3.83,NA,NA,1486,171,NA,NA,0,2016-07-16 15:00:00,2016-07-16,102,4
		220,"Subject 11",1,"0111",2016-07-16 15:43:53,80.0888,58.1856,0.4,0.726,0,3.83,NA,NA,238,55,NA,NA,0,2016-07-16 15:00:00,2016-07-16,102,4
		221,"Subject 11",1,"0111",2016-07-16 16:11:53,83.4746,61.1534,0.4,0.732,0.01,3.84,NA,NA,1191,168,NA,NA,0,2016-07-16 16:00:00,2016-07-16,103,4
		222,"Subject 11",1,"0111",2016-07-16 16:39:53,82.8894,61.864,0.4,0.746,0,3.84,NA,NA,84,16,NA,NA,0,2016-07-16 16:00:00,2016-07-16,103,4
		223,"Subject 11",1,"0111",2016-07-16 17:07:53,82.5132,61.4878,0.4,0.745,0,3.84,NA,NA,1200,230,NA,NA,0,2016-07-16 17:00:00,2016-07-16,104,4
		224,"Subject 11",1,"0111",2016-07-16 17:35:53,82.3878,60.5682,0.4,0.735,0,3.84,NA,NA,1423,130,NA,NA,0,2016-07-16 17:00:00,2016-07-16,104,4
		225,"Subject 11",1,"0111",2016-07-16 18:03:53,114.5738,86.8186,0.5,0.758,0.04,3.88,NA,NA,3027,925,NA,NA,0,2016-07-16 18:00:00,2016-07-16,105,4
		226,"Subject 11",1,"0111",2016-07-16 18:31:53,106.9662,78.7512,0.5,0.736,-0.01,3.87,NA,NA,4840,2040,NA,NA,0,2016-07-16 18:00:00,2016-07-16,105,4
		227,"Subject 11",1,"0111",2016-07-16 18:59:53,109.516,80.7158,0.5,0.737,0,3.87,NA,NA,1357,222,NA,NA,0,2016-07-16 18:00:00,2016-07-16,105,4
		228,"Subject 11",1,"0111",2016-07-16 19:27:53,112.4002,85.1466,0.5,0.758,0.05,3.92,NA,NA,4163,1302,NA,NA,0,2016-07-16 19:00:00,2016-07-16,106,4
		229,"Subject 11",1,"0111",2016-07-16 19:55:53,99.5258,74.613,0.5,0.75,0.06,3.98,NA,NA,1852,477,NA,NA,0,2016-07-16 19:00:00,2016-07-16,106,4
		230,"Subject 11",1,"0111",2016-07-16 20:23:53,111.7732,86.735,0.5,0.776,0.09,4.07,NA,NA,1824,395,NA,NA,0,2016-07-16 20:00:00,2016-07-16,107,4
		231,"Subject 11",1,"0111",2016-07-16 20:51:53,95.095,72.0214,0.5,0.758,0.07,4.14,NA,NA,1995,641,NA,NA,0,2016-07-16 20:00:00,2016-07-16,107,4
		232,"Subject 11",1,"0111",2016-07-16 21:19:53,95.5966,71.2272,0.5,0.745,0,4.14,NA,NA,734,54,NA,NA,0,2016-07-16 21:00:00,2016-07-16,108,4
		233,"Subject 11",1,"0111",2016-07-16 21:47:53,95.6802,72.4812,0.5,0.757,0.03,4.17,NA,NA,1741,267,NA,NA,0,2016-07-16 21:00:00,2016-07-16,108,4
		234,"Subject 11",1,"0111",2016-07-16 22:15:53,100.3618,74.3204,0.5,0.741,0.01,4.18,NA,NA,469,133,NA,NA,0,2016-07-16 22:00:00,2016-07-16,109,4
		235,"Subject 11",1,"0111",2016-07-16 22:43:53,118.5448,91.4166,0.6,0.771,0.07,4.25,NA,NA,4834,2001,NA,NA,0,2016-07-16 22:00:00,2016-07-16,109,4
		236,"Subject 11",1,"0111",2016-07-16 23:11:53,96.3072,68.2176,0.5,0.708,0,4.25,NA,NA,3711,640,NA,NA,0,2016-07-16 23:00:00,2016-07-16,110,4
		237,"Subject 11",1,"0111",2016-07-16 23:39:53,116.7892,87.4874,0.6,0.749,0.12,4.37,NA,NA,1491,546,NA,NA,0,2016-07-16 23:00:00,2016-07-16,110,4
		238,"Subject 11",1,"0111",2016-07-17 00:07:53,118.8792,88.6996,0.6,0.746,0,4.37,NA,NA,3809,1194,NA,NA,0,2016-07-17 00:00:00,2016-07-17,111,5
		239,"Subject 11",1,"0111",2016-07-17 00:35:53,83.9762,63.6196,0.4,0.758,0,4.37,NA,NA,1096,56,NA,NA,0,2016-07-17 00:00:00,2016-07-17,111,5
		240,"Subject 11",1,"0111",2016-07-17 01:03:53,83.9762,65.2498,0.4,0.777,0.03,4.4,NA,NA,1160,342,NA,NA,0,2016-07-17 01:00:00,2016-07-17,112,5
		241,"Subject 11",1,"0111",2016-07-17 01:31:53,89.3684,66.88,0.4,0.748,0,4.4,NA,NA,769,87,NA,NA,0,2016-07-17 01:00:00,2016-07-17,112,5
		242,"Subject 11",1,"0111",2016-07-17 01:59:53,87.6128,66.1694,0.4,0.755,0.03,4.43,NA,NA,1007,222,NA,NA,0,2016-07-17 01:00:00,2016-07-17,112,5
		243,"Subject 11",1,"0111",2016-07-17 02:27:53,90.7478,67.5488,0.4,0.744,0,4.43,NA,NA,709,128,NA,NA,0,2016-07-17 02:00:00,2016-07-17,113,5
		244,"Subject 11",1,"0111",2016-07-17 02:55:53,125.4,99.3168,0.6,0.792,0.15,4.58,NA,NA,4677,2264,NA,NA,0,2016-07-17 02:00:00,2016-07-17,113,5
		245,"Subject 11",1,"0111",2016-07-17 03:23:53,87.8636,66.4202,0.4,0.756,0,4.58,NA,NA,2551,748,NA,NA,0,2016-07-17 03:00:00,2016-07-17,114,5
		246,"Subject 11",1,"0111",2016-07-17 03:51:53,92.7124,69.2626,0.4,0.747,0,4.58,NA,NA,525,28,NA,NA,0,2016-07-17 03:00:00,2016-07-17,114,5
		247,"Subject 11",1,"0111",2016-07-17 04:19:53,98.1464,73.4426,0.5,0.748,0,4.58,NA,NA,960,213,NA,NA,0,2016-07-17 04:00:00,2016-07-17,115,5
		248,"Subject 11",1,"0111",2016-07-17 04:47:53,86.526,63.1598,0.4,0.73,0.01,4.59,NA,NA,990,98,NA,NA,0,2016-07-17 04:00:00,2016-07-17,115,5
		249,"Subject 11",1,"0111",2016-07-17 05:15:53,119.5062,92.5452,0.6,0.775,0.15,4.74,NA,NA,3002,1188,NA,NA,0,2016-07-17 05:00:00,2016-07-17,116,5
		250,"Subject 11",1,"0111",2016-07-17 05:43:53,87.4038,83.2238,0.4,0.952,0,4.74,NA,NA,4736,1785,NA,NA,0,2016-07-17 05:00:00,2016-07-17,116,5
		251,"Subject 11",1,"0111",2016-07-17 06:11:53,85.9826,64.79,0.4,0.754,0,4.74,NA,NA,2195,222,NA,NA,0,2016-07-17 06:00:00,2016-07-17,117,5
		252,"Subject 11",1,"0111",2016-07-17 06:39:53,84.8122,64.3302,0.4,0.758,0,4.74,NA,NA,250,29,NA,NA,0,2016-07-17 06:00:00,2016-07-17,117,5
		253,"Subject 11",1,"0111",2016-07-17 07:07:53,82.1788,62.5746,0.4,0.761,0,4.74,NA,NA,365,46,NA,NA,0,2016-07-17 07:00:00,2016-07-17,118,5
		254,"Subject 11",1,"0111",2016-07-17 07:35:53,80.3396,59.5232,0.4,0.741,0,4.74,NA,NA,1857,230,NA,NA,0,2016-07-17 07:00:00,2016-07-17,118,5
		255,"Subject 11",1,"0111",2016-07-17 08:03:53,97.185,75.3654,0.5,0.775,0.07,4.81,NA,NA,1009,190,NA,NA,0,2016-07-17 08:00:00,2016-07-17,119,5
		256,"Subject 11",1,"0111",2016-07-17 08:31:53,83.8508,64.79,0.4,0.772,-0.01,4.8,NA,NA,1616,309,NA,NA,0,2016-07-17 08:00:00,2016-07-17,119,5
		257,"Subject 11",1,"0111",2016-07-17 08:59:53,86.6514,65.5006,0.4,0.756,0.01,4.81,NA,NA,750,43,NA,NA,0,2016-07-17 08:00:00,2016-07-17,119,5
		258,"Subject 11",1,"0111",2016-07-17 09:27:53,77.539,58.729,0.4,0.758,0,4.81,NA,NA,436,62,NA,NA,0,2016-07-17 09:00:00,2016-07-17,120,5
		259,"Subject 11",1,"0111",2016-07-17 09:55:53,82.555,63.118,0.4,0.764,0,4.81,NA,NA,750,113,NA,NA,0,2016-07-17 09:00:00,2016-07-17,120,5
		260,"Subject 11",1,"0111",2016-07-17 10:23:53,78.9184,59.0634,0.4,0.748,0,4.81,NA,NA,811,119,NA,NA,0,2016-07-17 10:00:00,2016-07-17,121,5
		261,"Subject 11",1,"0111",2016-07-17 10:51:53,99.4004,76.703,0.5,0.772,0,4.81,NA,NA,1222,232,NA,NA,0,2016-07-17 10:00:00,2016-07-17,121,5
		262,"Subject 11",1,"0111",2016-07-17 11:19:53,78.0406,57.4332,0.4,0.736,0.01,4.82,NA,NA,750,65,NA,NA,0,2016-07-17 11:00:00,2016-07-17,122,5
		263,"Subject 11",1,"0111",2016-07-17 11:47:53,42.6778,29.6362,0.2,0.694,-0.01,4.81,NA,NA,1688,289,NA,NA,0,2016-07-17 11:00:00,2016-07-17,122,5
		264,"Subject 11",1,"0111",2016-07-17 12:15:53,94.9278,69.2208,0.4,0.729,0.01,4.82,NA,NA,515,44,NA,NA,0,2016-07-17 12:00:00,2016-07-17,123,5
		265,"Subject 11",1,"0111",2016-07-17 12:43:53,83.0148,61.7386,0.4,0.744,-0.01,4.81,NA,NA,747,44,NA,NA,0,2016-07-17 12:00:00,2016-07-17,123,5
		266,"Subject 11",1,"0111",2016-07-17 13:11:53,82.8476,61.655,0.4,0.745,0.01,4.82,NA,NA,681,137,NA,NA,0,2016-07-17 13:00:00,2016-07-17,124,5
		267,"Subject 11",1,"0111",2016-07-17 13:39:53,82.4714,62.5746,0.4,0.759,0,4.82,NA,NA,1070,147,NA,NA,0,2016-07-17 13:00:00,2016-07-17,124,5
		268,"Subject 11",1,"0111",2016-07-17 14:07:53,80.9666,59.8994,0.4,0.74,0,4.82,NA,NA,1065,70,NA,NA,0,2016-07-17 14:00:00,2016-07-17,125,5
		269,"Subject 11",1,"0111",2016-07-17 14:35:53,80.9666,60.6518,0.4,0.749,0,4.82,NA,NA,2285,67,NA,NA,0,2016-07-17 14:00:00,2016-07-17,125,5
		270,"Subject 11",1,"0111",2016-07-17 15:03:53,83.8508,63.0344,0.4,0.752,0,4.82,NA,NA,1096,193,NA,NA,0,2016-07-17 15:00:00,2016-07-17,126,5
		271,"Subject 11",1,"0111",2016-07-17 15:31:53,93.1304,70.0986,0.4,0.753,0,4.82,NA,NA,695,58,NA,NA,0,2016-07-17 15:00:00,2016-07-17,126,5
		272,"Subject 11",1,"0111",2016-07-17 15:59:53,81.301,60.1084,0.4,0.739,0,4.82,NA,NA,1821,133,NA,NA,0,2016-07-17 15:00:00,2016-07-17,126,5
		273,"Subject 11",1,"0111",2016-07-17 16:27:53,85.899,64.1212,0.4,0.746,-0.02,4.8,NA,NA,1473,276,NA,NA,0,2016-07-17 16:00:00,2016-07-17,127,5
		274,"Subject 11",1,"0111",2016-07-17 16:55:53,76.7866,57.3078,0.4,0.746,0,4.8,NA,NA,1070,105,NA,NA,0,2016-07-17 16:00:00,2016-07-17,127,5
		275,"Subject 11",1,"0111",2016-07-17 17:23:53,91.4584,67.507,0.4,0.738,0.04,4.84,NA,NA,2025,503,NA,NA,0,2016-07-17 17:00:00,2016-07-17,128,5
		276,"Subject 11",1,"0111",2016-07-17 17:51:53,93.9246,72.2722,0.4,0.77,0.01,4.85,NA,NA,1099,137,NA,NA,0,2016-07-17 17:00:00,2016-07-17,128,5
		277,"Subject 11",1,"0111",2016-07-17 18:19:53,97.9374,75.1982,0.5,0.768,0.07,4.92,NA,NA,1879,651,NA,NA,0,2016-07-17 18:00:00,2016-07-17,129,5
		278,"Subject 11",1,"0111",2016-07-17 18:47:53,103.7476,80.256,0.5,0.774,0.05,4.97,NA,NA,5607,2553,NA,NA,0,2016-07-17 18:00:00,2016-07-17,129,5
		279,"Subject 11",1,"0111",2016-07-17 19:15:53,105.963,80.8412,0.5,0.763,0.02,4.99,NA,NA,2432,339,NA,NA,0,2016-07-17 19:00:00,2016-07-17,130,5
		280,"Subject 11",1,"0111",2016-07-17 19:43:53,108.7218,82.0534,0.5,0.755,0.11,5.1,NA,NA,5317,2502,NA,NA,0,2016-07-17 19:00:00,2016-07-17,130,5
		281,"Subject 11",1,"0111",2016-07-17 20:11:53,92.9632,69.6806,0.4,0.75,0,5.1,NA,NA,862,132,NA,NA,0,2016-07-17 20:00:00,2016-07-17,131,5
		282,"Subject 11",1,"0111",2016-07-17 20:39:53,91.5838,72.7738,0.4,0.795,0.04,5.14,NA,NA,1644,472,NA,NA,0,2016-07-17 20:00:00,2016-07-17,131,5
		283,"Subject 11",1,"0111",2016-07-17 21:07:53,122.056,95.0114,0.6,0.778,0.16,5.3,NA,NA,2309,1136,NA,NA,0,2016-07-17 21:00:00,2016-07-17,132,5
		284,"Subject 11",1,"0111",2016-07-17 21:35:53,105.4196,83.5582,0.5,0.793,0.06,5.36,NA,NA,5028,1886,NA,NA,0,2016-07-17 21:00:00,2016-07-17,132,5
		285,"Subject 11",1,"0111",2016-07-17 22:03:53,93.841,71.478,0.4,0.762,0,5.36,NA,NA,1008,120,NA,NA,0,2016-07-17 22:00:00,2016-07-17,133,5
		286,"Subject 11",1,"0111",2016-07-17 22:31:53,91.7928,69.3044,0.4,0.755,0,5.36,NA,NA,1747,126,NA,NA,0,2016-07-17 22:00:00,2016-07-17,133,5
		287,"Subject 11",1,"0111",2016-07-17 22:59:53,85.6482,63.8286,0.4,0.746,0.01,5.37,NA,NA,593,129,NA,NA,0,2016-07-17 22:00:00,2016-07-17,133,5
		288,"Subject 11",1,"0111",2016-07-17 23:27:53,108.3038,86.6096,0.5,0.8,0.17,5.54,NA,NA,5506,2554,NA,NA,0,2016-07-17 23:00:00,2016-07-17,134,5
		289,"Subject 11",1,"0111",2016-07-17 23:55:53,90.288,68.2176,0.4,0.755,0,5.54,NA,NA,1383,272,NA,NA,0,2016-07-17 23:00:00,2016-07-17,134,5
		290,"Subject 11",1,"0111",2016-07-18 00:23:53,99.693,76.2432,0.5,0.765,0,5.54,NA,NA,1199,184,NA,NA,0,2016-07-18 00:00:00,2016-07-18,135,6
		291,"Subject 11",1,"0111",2016-07-18 00:51:53,91.5838,68.134,0.4,0.744,0.02,5.56,NA,NA,715,65,NA,NA,0,2016-07-18 00:00:00,2016-07-18,135,6
		292,"Subject 11",1,"0111",2016-07-18 01:19:53,101.783,77.1628,0.5,0.758,0.01,5.57,NA,NA,2639,145,NA,NA,0,2016-07-18 01:00:00,2016-07-18,136,6
		293,"Subject 11",1,"0111",2016-07-18 01:47:53,84.8958,62.4074,0.4,0.735,-0.02,5.55,NA,NA,1616,199,NA,NA,0,2016-07-18 01:00:00,2016-07-18,136,6
		294,"Subject 11",1,"0111",2016-07-18 02:15:53,84.018,66.7128,0.4,0.794,0.06,5.61,NA,NA,2298,216,NA,NA,0,2016-07-18 02:00:00,2016-07-18,137,6
		295,"Subject 11",1,"0111",2016-07-18 02:43:53,117.7506,88.825,0.6,0.754,0.14,5.75,NA,NA,1985,503,NA,NA,0,2016-07-18 02:00:00,2016-07-18,137,6
		296,"Subject 11",1,"0111",2016-07-18 03:11:53,90.5806,69.9732,0.4,0.773,0,5.75,NA,NA,1928,41,NA,NA,0,2016-07-18 03:00:00,2016-07-18,138,6
		297,"Subject 11",1,"0111",2016-07-18 03:39:53,86.6096,66.3784,0.4,0.766,0.01,5.76,NA,NA,367,52,NA,NA,0,2016-07-18 03:00:00,2016-07-18,138,6
		298,"Subject 11",1,"0111",2016-07-18 04:07:53,90.3298,69.4716,0.4,0.769,0.04,5.8,NA,NA,1627,322,NA,NA,0,2016-07-18 04:00:00,2016-07-18,139,6
		299,"Subject 11",1,"0111",2016-07-18 04:35:53,120.7184,94.3426,0.6,0.782,0.08,5.88,NA,NA,2856,1042,NA,NA,0,2016-07-18 04:00:00,2016-07-18,139,6
		300,"Subject 11",1,"0111",2016-07-18 05:03:53,82.5132,61.6968,0.4,0.748,0,5.88,NA,NA,1249,292,NA,NA,0,2016-07-18 05:00:00,2016-07-18,140,6
		301,"Subject 11",1,"0111",2016-07-18 05:31:53,88.198,68.6774,0.4,0.779,0.04,5.92,NA,NA,1072,188,NA,NA,0,2016-07-18 05:00:00,2016-07-18,140,6
		302,"Subject 11",1,"0111",2016-07-18 05:59:53,117.249,93.3394,0.6,0.796,0.14,6.06,NA,NA,3019,1359,NA,NA,0,2016-07-18 05:00:00,2016-07-18,140,6
		303,"Subject 11",1,"0111",2016-07-18 06:27:53,102.7026,79.838,0.5,0.778,0,6.06,NA,NA,2838,964,NA,NA,0,2016-07-18 06:00:00,2016-07-18,141,6
		304,"Subject 11",1,"0111",2016-07-18 06:55:53,81.2174,62.073,0.4,0.764,0,6.06,NA,NA,655,49,NA,NA,0,2016-07-18 06:00:00,2016-07-18,141,6
		305,"Subject 11",1,"0111",2016-07-18 07:23:53,79.5454,59.983,0.4,0.754,0,6.06,NA,NA,517,15,NA,NA,0,2016-07-18 07:00:00,2016-07-18,142,6
		306,"Subject 11",1,"0111",2016-07-18 07:51:53,80.2978,61.3206,0.4,0.763,0,6.06,NA,NA,1227,91,NA,NA,0,2016-07-18 07:00:00,2016-07-18,142,6
		307,"Subject 11",1,"0111",2016-07-18 08:19:53,77.0792,60.2338,0.4,0.781,0.03,6.09,NA,NA,474,48,NA,NA,0,2016-07-18 08:00:00,2016-07-18,143,6
		308,"Subject 11",1,"0111",2016-07-18 08:47:53,78.793,60.0666,0.4,0.762,0,6.09,NA,NA,790,162,NA,NA,0,2016-07-18 08:00:00,2016-07-18,143,6
		309,"Subject 11",1,"0111",2016-07-18 09:15:53,80.3396,65.208,0.4,0.812,0.08,6.17,NA,NA,684,82,NA,NA,0,2016-07-18 09:00:00,2016-07-18,144,6
		310,"Subject 11",1,"0111",2016-07-18 09:43:53,80.7994,62.491,0.4,0.774,0.01,6.18,NA,NA,336,34,NA,NA,0,2016-07-18 09:00:00,2016-07-18,144,6
		311,"Subject 11",1,"0111",2016-07-18 10:11:53,72.5648,55.7612,0.3,0.768,0,6.18,NA,NA,407,47,NA,NA,0,2016-07-18 10:00:00,2016-07-18,145,6
		312,"Subject 11",1,"0111",2016-07-18 10:39:53,122.9756,92.169,0.6,0.749,0,6.18,NA,NA,1269,125,NA,NA,0,2016-07-18 10:00:00,2016-07-18,145,6
		313,"Subject 11",1,"0111",NA,0,0,0,0,0,0,NA,NA,0,0,NA,NA,0,NA,NA,NA,NA
		314,"Subject 11",1,NA,NA,NA,NA,NA,NA,NA,NA,NA,NA,NA,NA,NA,NA,NA,NA,NA,NA,NA
		315,"Subject 12",2,"0112",2016-07-12 09:33:53,161.3955,123.0915,0.8,0.763,0,0,NA,NA,10463,6306,NA,NA,0,2016-07-12 09:00:00,2016-07-12,0,0
		316,"Subject 12",2,"0112",2016-07-12 10:01:53,134.1837,102.0642,0.6,0.761,0.13,0.13,NA,NA,8458,4957,NA,NA,0,2016-07-12 10:00:00,2016-07-12,1,0
		317,"Subject 12",2,"0112",2016-07-12 10:29:53,129.7548,101.0268,0.6,0.779,-0.01,0.12,NA,NA,4547,1688,NA,NA,0,2016-07-12 10:00:00,2016-07-12,1,0
		318,"Subject 12",2,"0112",2016-07-12 10:57:53,104.6577,78.6828,0.5,0.752,0.01,0.13,NA,NA,1321,97,NA,NA,0,2016-07-12 10:00:00,2016-07-12,1,0
		319,"Subject 12",2,"0112",2016-07-12 11:25:53,123.1713,96.4782,0.6,0.783,-0.01,0.12,NA,NA,946,97,NA,NA,0,2016-07-12 11:00:00,2016-07-12,2,0
		320,"Subject 12",2,"0112",2016-07-12 11:53:53,126.5229,99.5505,0.6,0.787,0,0.12,NA,NA,4796,2177,NA,NA,0,2016-07-12 11:00:00,2016-07-12,2,0
		321,"Subject 12",2,"0112",2016-07-12 12:21:53,109.6053,82.7526,0.5,0.755,0,0.12,NA,NA,1238,136,NA,NA,0,2016-07-12 12:00:00,2016-07-12,3,0
		322,"Subject 12",2,"0112",2016-07-12 12:49:53,103.3809,78.9222,0.5,0.764,-0.01,0.11,NA,NA,936,54,NA,NA,0,2016-07-12 12:00:00,2016-07-12,3,0
		323,"Subject 12",2,"0112",2016-07-12 13:17:53,109.5255,86.3436,0.5,0.788,0.05,0.16,NA,NA,1100,225,NA,NA,0,2016-07-12 13:00:00,2016-07-12,4,0
		324,"Subject 12",2,"0112",2016-07-12 13:45:53,131.4306,106.3734,0.6,0.809,0.04,0.2,NA,NA,3605,1094,NA,NA,0,2016-07-12 13:00:00,2016-07-12,4,0
		325,"Subject 12",2,"0112",2016-07-12 14:13:53,99.4707,76.2888,0.5,0.767,0,0.2,NA,NA,238,41,NA,NA,0,2016-07-12 14:00:00,2016-07-12,5,0
		326,"Subject 12",2,"0112",2016-07-12 14:41:53,106.3335,83.5107,0.5,0.785,0.04,0.24,NA,NA,357,74,NA,NA,0,2016-07-12 14:00:00,2016-07-12,5,0
		327,"Subject 12",2,"0112",2016-07-12 15:09:53,105.4158,83.79,0.5,0.795,0.04,0.28,NA,NA,1031,240,NA,NA,0,2016-07-12 15:00:00,2016-07-12,6,0
		328,"Subject 12",2,"0112",2016-07-12 15:37:53,123.2112,95.7201,0.6,0.777,0,0.28,NA,NA,2973,601,NA,NA,0,2016-07-12 15:00:00,2016-07-12,6,0
		329,"Subject 12",2,"0112",2016-07-12 16:05:53,104.4183,79.5207,0.5,0.761,0,0.28,NA,NA,719,50,NA,NA,0,2016-07-12 16:00:00,2016-07-12,7,0
		330,"Subject 12",2,"0112",2016-07-12 16:33:53,101.745,79.2414,0.5,0.779,0.02,0.3,NA,NA,486,39,NA,NA,0,2016-07-12 16:00:00,2016-07-12,7,0
		331,"Subject 12",2,"0112",2016-07-12 17:01:53,99.2313,78.2439,0.5,0.788,0.04,0.34,NA,NA,996,64,NA,NA,0,2016-07-12 17:00:00,2016-07-12,8,0
		332,"Subject 12",2,"0112",2016-07-12 17:29:53,128.5977,103.0218,0.6,0.801,0,0.34,NA,NA,1799,863,NA,NA,0,2016-07-12 17:00:00,2016-07-12,8,0
		333,"Subject 12",2,"0112",2016-07-12 17:57:53,117.2262,91.5306,0.6,0.781,0.05,0.39,NA,NA,2430,740,NA,NA,0,2016-07-12 17:00:00,2016-07-12,8,0
		334,"Subject 12",2,"0112",2016-07-12 18:25:53,135.66,105.336,0.6,0.776,0.01,0.4,NA,NA,2424,1253,NA,NA,0,2016-07-12 18:00:00,2016-07-12,9,0
		335,"Subject 12",2,"0112",2016-07-12 18:53:53,134.5428,110.6826,0.6,0.823,0.06,0.46,NA,NA,4033,1513,NA,NA,0,2016-07-12 18:00:00,2016-07-12,9,0
		336,"Subject 12",2,"0112",2016-07-12 19:21:53,113.3559,84.7875,0.5,0.748,0,0.46,NA,NA,1075,78,NA,NA,0,2016-07-12 19:00:00,2016-07-12,10,0
		337,"Subject 12",2,"0112",2016-07-12 19:49:53,140.4081,106.0941,0.7,0.756,0.04,0.5,NA,NA,5881,2846,NA,NA,0,2016-07-12 19:00:00,2016-07-12,10,0
		338,"Subject 12",2,"0112",2016-07-12 20:17:53,132.5877,103.5804,0.6,0.781,0.08,0.58,NA,NA,3063,866,NA,NA,0,2016-07-12 20:00:00,2016-07-12,11,0
		339,"Subject 12",2,"0112",2016-07-12 20:45:53,135.6999,112.8771,0.7,0.832,0.15,0.73,NA,NA,4556,2090,NA,NA,0,2016-07-12 20:00:00,2016-07-12,11,0
		340,"Subject 12",2,"0112",2016-07-12 21:13:53,126.0042,100.6677,0.6,0.799,0.03,0.76,NA,NA,2542,977,NA,NA,0,2016-07-12 21:00:00,2016-07-12,12,0
		341,"Subject 12",2,"0112",2016-07-12 21:41:53,135.0615,104.7375,0.6,0.776,0,0.76,NA,NA,1812,745,NA,NA,0,2016-07-12 21:00:00,2016-07-12,12,0
		342,"Subject 12",2,"0112",2016-07-12 22:09:53,138.0141,109.9644,0.7,0.797,0.14,0.9,NA,NA,4135,1343,NA,NA,0,2016-07-12 22:00:00,2016-07-12,13,0
		343,"Subject 12",2,"0112",2016-07-12 22:37:53,103.4607,78.5232,0.5,0.759,0.01,0.91,NA,NA,860,20,NA,NA,0,2016-07-12 22:00:00,2016-07-12,13,0
		344,"Subject 12",2,"0112",2016-07-12 23:05:53,131.4306,107.8098,0.6,0.82,0.12,1.03,NA,NA,2494,954,NA,NA,0,2016-07-12 23:00:00,2016-07-12,14,0
		345,"Subject 12",2,"0112",2016-07-12 23:33:53,132.4281,109.1265,0.6,0.824,0.08,1.11,NA,NA,3164,1109,NA,NA,0,2016-07-12 23:00:00,2016-07-12,14,0
		346,"Subject 12",2,"0112",2016-07-13 00:01:53,102.0243,78.6429,0.5,0.771,0,1.11,NA,NA,556,11,NA,NA,0,2016-07-13 00:00:00,2016-07-13,15,1
		347,"Subject 12",2,"0112",2016-07-13 00:29:53,132.9069,107.0916,0.6,0.806,0.1,1.21,NA,NA,1767,649,NA,NA,0,2016-07-13 00:00:00,2016-07-13,15,1
		348,"Subject 12",2,"0112",2016-07-13 00:57:53,121.9743,97.6752,0.6,0.801,0.03,1.24,NA,NA,3133,659,NA,NA,0,2016-07-13 00:00:00,2016-07-13,15,1
		349,"Subject 12",2,"0112",2016-07-13 01:25:53,108.7275,83.3112,0.5,0.766,-0.01,1.23,NA,NA,1114,31,NA,NA,0,2016-07-13 01:00:00,2016-07-13,16,1
		350,"Subject 12",2,"0112",2016-07-13 01:53:53,109.3659,88.3785,0.5,0.808,0.1,1.33,NA,NA,2080,374,NA,NA,0,2016-07-13 01:00:00,2016-07-13,16,1
		351,"Subject 12",2,"0112",2016-07-13 02:21:53,103.9794,78.8424,0.5,0.758,0,1.33,NA,NA,486,21,NA,NA,0,2016-07-13 02:00:00,2016-07-13,17,1
		352,"Subject 12",2,"0112",2016-07-13 02:49:53,123.4506,99.4308,0.6,0.806,0.07,1.4,NA,NA,2839,843,NA,NA,0,2016-07-13 02:00:00,2016-07-13,17,1
		353,"Subject 12",2,"0112",2016-07-13 03:17:53,100.6677,76.3686,0.5,0.759,0.04,1.44,NA,NA,1488,132,NA,NA,0,2016-07-13 03:00:00,2016-07-13,18,1
		354,"Subject 12",2,"0112",2016-07-13 03:45:53,145.5951,118.2237,0.7,0.812,0.16,1.6,NA,NA,3834,1586,NA,NA,0,2016-07-13 03:00:00,2016-07-13,18,1
		355,"Subject 12",2,"0112",2016-07-13 04:13:53,128.877,104.8173,0.6,0.813,0.06,1.66,NA,NA,3969,1396,NA,NA,0,2016-07-13 04:00:00,2016-07-13,19,1
		356,"Subject 12",2,"0112",2016-07-13 04:41:53,104.0193,78.9222,0.5,0.759,0,1.66,NA,NA,938,138,NA,NA,0,2016-07-13 04:00:00,2016-07-13,19,1
		357,"Subject 12",2,"0112",2016-07-13 05:09:53,145.1562,117.9843,0.7,0.813,0.09,1.75,NA,NA,2766,1221,NA,NA,0,2016-07-13 05:00:00,2016-07-13,20,1
		358,"Subject 12",2,"0112",2016-07-13 05:37:53,133.4256,110.3235,0.6,0.827,0.14,1.89,NA,NA,5505,2846,NA,NA,0,2016-07-13 05:00:00,2016-07-13,20,1
		359,"Subject 12",2,"0112",2016-07-13 06:05:53,129.1962,99.6702,0.6,0.772,0.01,1.9,NA,NA,4447,1692,NA,NA,0,2016-07-13 06:00:00,2016-07-13,21,1
		360,"Subject 12",2,"0112",2016-07-13 06:33:53,143.9592,110.4831,0.7,0.768,-0.01,1.89,NA,NA,1903,877,NA,NA,0,2016-07-13 06:00:00,2016-07-13,21,1
		361,"Subject 12",2,"0112",2016-07-13 07:01:53,128.6775,104.8173,0.6,0.814,0.13,2.02,NA,NA,4781,1963,NA,NA,0,2016-07-13 07:00:00,2016-07-13,22,1
		362,"Subject 12",2,"0112",2016-07-13 07:29:53,103.4607,78.0045,0.5,0.754,0.01,2.03,NA,NA,451,60,NA,NA,0,2016-07-13 07:00:00,2016-07-13,22,1
		363,"Subject 12",2,"0112",2016-07-13 07:57:53,115.311,94.4034,0.6,0.819,0.03,2.06,NA,NA,2879,1071,NA,NA,0,2016-07-13 07:00:00,2016-07-13,22,1
		364,"Subject 12",2,"0112",2016-07-13 08:25:53,108.7275,81.7152,0.5,0.751,0,2.06,NA,NA,1207,71,NA,NA,0,2016-07-13 08:00:00,2016-07-13,23,1
		365,"Subject 12",2,"0112",2016-07-13 08:53:53,130.473,100.3884,0.6,0.769,0.02,2.08,NA,NA,2572,963,NA,NA,0,2016-07-13 08:00:00,2016-07-13,23,1
		366,"Subject 12",2,"0112",2016-07-13 09:21:53,106.932,80.1591,0.5,0.75,0,2.08,NA,NA,2011,466,NA,NA,0,2016-07-13 09:00:00,2016-07-13,24,1
		367,"Subject 12",2,"0112",2016-07-13 09:49:53,100.8672,76.0095,0.5,0.753,0.01,2.09,NA,NA,196,20,NA,NA,0,2016-07-13 09:00:00,2016-07-13,24,1
		368,"Subject 12",2,"0112",2016-07-13 10:17:53,124.6077,101.7051,0.6,0.816,0.08,2.17,NA,NA,3281,990,NA,NA,0,2016-07-13 10:00:00,2016-07-13,25,1
		369,"Subject 12",2,"0112",2016-07-13 10:45:53,108.2088,80.4384,0.5,0.743,0,2.17,NA,NA,76,4,NA,NA,0,2016-07-13 10:00:00,2016-07-13,25,1
		370,"Subject 12",2,"0112",2016-07-13 11:13:53,104.4183,78.9222,0.5,0.756,0,2.17,NA,NA,285,33,NA,NA,0,2016-07-13 11:00:00,2016-07-13,26,1
		371,"Subject 12",2,"0112",2016-07-13 11:41:53,105.5754,82.4334,0.5,0.781,0.06,2.23,NA,NA,1959,373,NA,NA,0,2016-07-13 11:00:00,2016-07-13,26,1
		372,"Subject 12",2,"0112",2016-07-13 12:09:53,101.745,79.4808,0.5,0.781,0.04,2.27,NA,NA,982,85,NA,NA,0,2016-07-13 12:00:00,2016-07-13,27,1
		373,"Subject 12",2,"0112",2016-07-13 12:37:53,105.4557,85.7451,0.5,0.813,0.06,2.33,NA,NA,300,32,NA,NA,0,2016-07-13 12:00:00,2016-07-13,27,1
		374,"Subject 12",2,"0112",2016-07-13 13:05:53,98.0343,75.9696,0.5,0.775,0.01,2.34,NA,NA,334,38,NA,NA,0,2016-07-13 13:00:00,2016-07-13,28,1
		375,"Subject 12",2,"0112",2016-07-13 13:33:53,109.8846,83.3511,0.5,0.758,0.04,2.38,NA,NA,2126,654,NA,NA,0,2016-07-13 13:00:00,2016-07-13,28,1
		376,"Subject 12",2,"0112",2016-07-13 14:01:53,122.5329,95.6802,0.6,0.781,0,2.38,NA,NA,1311,476,NA,NA,0,2016-07-13 14:00:00,2016-07-13,29,1
		377,"Subject 12",2,"0112",2016-07-13 14:29:53,121.9344,93.4857,0.6,0.767,0.02,2.4,NA,NA,3437,1403,NA,NA,0,2016-07-13 14:00:00,2016-07-13,29,1
		378,"Subject 12",2,"0112",2016-07-13 14:57:53,49.5957,37.5459,0.2,0.757,0,2.4,NA,NA,958,456,NA,NA,0,2016-07-13 14:00:00,2016-07-13,29,1
		379,"Subject 12",2,"0112",2016-07-13 15:25:53,108.4083,79.6803,0.5,0.735,0,2.4,NA,NA,240,3,NA,NA,0,2016-07-13 15:00:00,2016-07-13,30,1
		380,"Subject 12",2,"0112",2016-07-13 15:53:53,106.7724,79.2015,0.5,0.742,-0.01,2.39,NA,NA,320,31,NA,NA,0,2016-07-13 15:00:00,2016-07-13,30,1
		381,"Subject 12",2,"0112",2016-07-13 16:21:53,99.5904,75.2514,0.5,0.756,0,2.39,NA,NA,740,85,NA,NA,0,2016-07-13 16:00:00,2016-07-13,31,1
		382,"Subject 12",2,"0112",2016-07-13 16:49:53,96.6378,73.4958,0.5,0.761,0,2.39,NA,NA,328,17,NA,NA,0,2016-07-13 16:00:00,2016-07-13,31,1
		383,"Subject 12",2,"0112",2016-07-13 17:17:53,96.5181,73.0968,0.5,0.757,0,2.39,NA,NA,415,34,NA,NA,0,2016-07-13 17:00:00,2016-07-13,32,1
		384,"Subject 12",2,"0112",2016-07-13 17:45:53,94.4832,69.9048,0.4,0.74,0,2.39,NA,NA,328,42,NA,NA,0,2016-07-13 17:00:00,2016-07-13,32,1
		385,"Subject 12",2,"0112",2016-07-13 18:13:53,96.4383,72.5382,0.5,0.752,0,2.39,NA,NA,242,68,NA,NA,0,2016-07-13 18:00:00,2016-07-13,33,1
		386,"Subject 12",2,"0112",2016-07-13 18:41:53,96.4782,71.2614,0.5,0.739,0.01,2.4,NA,NA,667,22,NA,NA,0,2016-07-13 18:00:00,2016-07-13,33,1
		387,"Subject 12",2,"0112",2016-07-13 19:09:53,96.1191,71.2215,0.5,0.741,0,2.4,NA,NA,145,9,NA,NA,0,2016-07-13 19:00:00,2016-07-13,34,1
		388,"Subject 12",2,"0112",2016-07-13 19:37:53,103.5405,77.3661,0.5,0.747,0,2.4,NA,NA,427,71,NA,NA,0,2016-07-13 19:00:00,2016-07-13,34,1
		389,"Subject 12",2,"0112",2016-07-13 20:05:53,99.6303,73.8549,0.5,0.742,0.01,2.41,NA,NA,671,66,NA,NA,0,2016-07-13 20:00:00,2016-07-13,35,1
		390,"Subject 12",2,"0112",2016-07-13 20:33:53,100.6278,75.3711,0.5,0.749,-0.01,2.4,NA,NA,433,67,NA,NA,0,2016-07-13 20:00:00,2016-07-13,35,1
		391,"Subject 12",2,"0112",2016-07-13 21:01:53,103.1016,76.0494,0.5,0.738,0,2.4,NA,NA,908,99,NA,NA,0,2016-07-13 21:00:00,2016-07-13,36,1
		392,"Subject 12",2,"0112",2016-07-13 21:29:53,100.3485,74.8923,0.5,0.746,0,2.4,NA,NA,369,70,NA,NA,0,2016-07-13 21:00:00,2016-07-13,36,1
		393,"Subject 12",2,"0112",2016-07-13 21:57:53,99.3909,74.2539,0.5,0.747,0,2.4,NA,NA,1221,102,NA,NA,0,2016-07-13 21:00:00,2016-07-13,36,1
		394,"Subject 12",2,"0112",2016-07-13 22:25:53,102.3036,76.8474,0.5,0.751,-0.01,2.39,NA,NA,465,5,NA,NA,0,2016-07-13 22:00:00,2016-07-13,37,1
		395,"Subject 12",2,"0112",2016-07-13 22:53:53,95.76,71.3412,0.5,0.745,0.01,2.4,NA,NA,214,38,NA,NA,0,2016-07-13 22:00:00,2016-07-13,37,1
		396,"Subject 12",2,"0112",2016-07-13 23:21:53,98.952,74.1342,0.5,0.749,-0.01,2.39,NA,NA,302,36,NA,NA,0,2016-07-13 23:00:00,2016-07-13,38,1
		397,"Subject 12",2,"0112",2016-07-13 23:49:53,101.1066,75.3312,0.5,0.745,0.01,2.4,NA,NA,409,36,NA,NA,0,2016-07-13 23:00:00,2016-07-13,38,1
		398,"Subject 12",2,"0112",2016-07-14 00:17:53,98.7924,74.0943,0.5,0.75,0,2.4,NA,NA,629,23,NA,NA,0,2016-07-14 00:00:00,2016-07-14,39,2
		399,"Subject 12",2,"0112",2016-07-14 00:45:53,98.4732,73.4958,0.5,0.746,0,2.4,NA,NA,529,28,NA,NA,0,2016-07-14 00:00:00,2016-07-14,39,2
		400,"Subject 12",2,"0112",2016-07-14 01:13:53,103.2213,75.411,0.5,0.731,0,2.4,NA,NA,701,217,NA,NA,0,2016-07-14 01:00:00,2016-07-14,40,2
		401,"Subject 12",2,"0112",2016-07-14 01:41:53,100.5081,74.4534,0.5,0.741,0,2.4,NA,NA,1,0,NA,NA,0,2016-07-14 01:00:00,2016-07-14,40,2
		402,"Subject 12",2,"0112",2016-07-14 02:09:53,97.9146,72.1791,0.5,0.737,0,2.4,NA,NA,4,1,NA,NA,0,2016-07-14 02:00:00,2016-07-14,41,2
		403,"Subject 12",2,"0112",2016-07-14 02:37:53,96.7974,73.1367,0.5,0.755,0,2.4,NA,NA,169,18,NA,NA,0,2016-07-14 02:00:00,2016-07-14,41,2
		404,"Subject 12",2,"0112",2016-07-14 03:05:53,101.5854,74.4135,0.5,0.733,0,2.4,NA,NA,92,0,NA,NA,0,2016-07-14 03:00:00,2016-07-14,42,2
		405,"Subject 12",2,"0112",2016-07-14 03:33:53,106.3734,79.6005,0.5,0.748,0.01,2.41,NA,NA,550,70,NA,NA,0,2016-07-14 03:00:00,2016-07-14,42,2
		406,"Subject 12",2,"0112",2016-07-14 04:01:53,102.7425,74.6928,0.5,0.727,-0.01,2.4,NA,NA,592,34,NA,NA,0,2016-07-14 04:00:00,2016-07-14,43,2
		407,"Subject 12",2,"0112",2016-07-14 04:29:53,106.134,78.7227,0.5,0.742,0.02,2.42,NA,NA,976,184,NA,NA,0,2016-07-14 04:00:00,2016-07-14,43,2
		408,"Subject 12",2,"0112",2016-07-14 04:57:53,104.0193,77.2464,0.5,0.743,0,2.42,NA,NA,370,37,NA,NA,0,2016-07-14 04:00:00,2016-07-14,43,2
		409,"Subject 12",2,"0112",2016-07-14 05:25:53,115.2711,85.9047,0.5,0.745,0.01,2.43,NA,NA,1006,231,NA,NA,0,2016-07-14 05:00:00,2016-07-14,44,2
		410,"Subject 12",2,"0112",2016-07-14 05:53:53,106.7325,79.0818,0.5,0.741,0,2.43,NA,NA,1239,227,NA,NA,0,2016-07-14 05:00:00,2016-07-14,44,2
		411,"Subject 12",2,"0112",2016-07-14 06:21:53,107.0916,79.6005,0.5,0.743,0.01,2.44,NA,NA,727,116,NA,NA,0,2016-07-14 06:00:00,2016-07-14,45,2
		412,"Subject 12",2,"0112",2016-07-14 06:49:53,105.2562,77.9247,0.5,0.74,0.01,2.45,NA,NA,1521,295,NA,NA,0,2016-07-14 06:00:00,2016-07-14,45,2
		413,"Subject 12",2,"0112",2016-07-14 07:17:53,100.5081,75.8499,0.5,0.755,0,2.45,NA,NA,354,40,NA,NA,0,2016-07-14 07:00:00,2016-07-14,46,2
		414,"Subject 12",2,"0112",2016-07-14 07:45:53,107.4906,79.6803,0.5,0.741,0.04,2.49,NA,NA,1158,124,NA,NA,0,2016-07-14 07:00:00,2016-07-14,46,2
		415,"Subject 12",2,"0112",2016-07-14 08:13:53,101.5854,76.4883,0.5,0.753,0,2.49,NA,NA,934,107,NA,NA,0,2016-07-14 08:00:00,2016-07-14,47,2
		416,"Subject 12",2,"0112",2016-07-14 08:41:53,107.73,79.6803,0.5,0.74,0,2.49,NA,NA,844,83,NA,NA,0,2016-07-14 08:00:00,2016-07-14,47,2
		417,"Subject 12",2,"0112",2016-07-14 09:09:53,103.2612,75.6504,0.5,0.732,0,2.49,NA,NA,561,71,NA,NA,0,2016-07-14 09:00:00,2016-07-14,48,2
		418,"Subject 12",2,"0112",2016-07-14 09:37:53,107.0517,79.8,0.5,0.746,0,2.49,NA,NA,904,172,NA,NA,0,2016-07-14 09:00:00,2016-07-14,48,2
		419,"Subject 12",2,"0112",2016-07-14 10:05:53,108.8871,80.1591,0.5,0.736,0,2.49,NA,NA,1227,143,NA,NA,0,2016-07-14 10:00:00,2016-07-14,49,2
		420,"Subject 12",2,"0112",2016-07-14 10:33:53,116.9868,86.2239,0.6,0.737,0.01,2.5,NA,NA,1806,486,NA,NA,0,2016-07-14 10:00:00,2016-07-14,49,2
		421,"Subject 12",2,"0112",2016-07-14 11:01:53,108.8871,78.4035,0.5,0.72,-0.01,2.49,NA,NA,374,47,NA,NA,0,2016-07-14 11:00:00,2016-07-14,50,2
		422,"Subject 12",2,"0112",2016-07-14 11:29:53,105.2163,76.7277,0.5,0.729,0.01,2.5,NA,NA,375,45,NA,NA,0,2016-07-14 11:00:00,2016-07-14,50,2
		423,"Subject 12",2,"0112",2016-07-14 11:57:53,111.3609,82.1541,0.5,0.738,0,2.5,NA,NA,621,27,NA,NA,0,2016-07-14 11:00:00,2016-07-14,50,2
		424,"Subject 12",2,"0112",2016-07-14 12:25:53,107.6103,77.805,0.5,0.723,0,2.5,NA,NA,1131,266,NA,NA,0,2016-07-14 12:00:00,2016-07-14,51,2
		425,"Subject 12",2,"0112",2016-07-14 12:53:53,112.7175,85.6653,0.5,0.76,0.04,2.54,NA,NA,999,218,NA,NA,0,2016-07-14 12:00:00,2016-07-14,51,2
		426,"Subject 12",2,"0112",2016-07-14 13:21:53,105.6951,78.8025,0.5,0.746,0,2.54,NA,NA,1485,200,NA,NA,0,2016-07-14 13:00:00,2016-07-14,52,2
		427,"Subject 12",2,"0112",2016-07-14 13:49:53,79.3611,56.0196,0.4,0.706,0,2.54,NA,NA,3625,433,NA,NA,0,2016-07-14 13:00:00,2016-07-14,52,2
		428,"Subject 12",2,"0112",2016-07-14 14:17:53,123.69,89.2962,0.6,0.722,-0.01,2.53,NA,NA,2400,176,NA,NA,0,2016-07-14 14:00:00,2016-07-14,53,2
		429,"Subject 12",2,"0112",2016-07-14 14:45:53,114.5529,84.0693,0.5,0.734,0,2.53,NA,NA,1219,86,NA,NA,0,2016-07-14 14:00:00,2016-07-14,53,2
		430,"Subject 12",2,"0112",2016-07-14 15:13:53,110.8422,80.2788,0.5,0.724,0.01,2.54,NA,NA,1949,354,NA,NA,0,2016-07-14 15:00:00,2016-07-14,54,2
		431,"Subject 12",2,"0112",2016-07-14 15:41:53,108.2088,77.805,0.5,0.719,-0.01,2.53,NA,NA,1627,59,NA,NA,0,2016-07-14 15:00:00,2016-07-14,54,2
		432,"Subject 12",2,"0112",2016-07-14 16:09:53,105.2163,77.1267,0.5,0.733,0.01,2.54,NA,NA,1493,115,NA,NA,0,2016-07-14 16:00:00,2016-07-14,55,2
		433,"Subject 12",2,"0112",2016-07-14 16:37:53,125.7648,93.7251,0.6,0.745,0.02,2.56,NA,NA,1816,339,NA,NA,0,2016-07-14 16:00:00,2016-07-14,55,2
		434,"Subject 12",2,"0112",2016-07-14 17:05:53,107.4906,78.4035,0.5,0.73,0,2.56,NA,NA,1249,182,NA,NA,0,2016-07-14 17:00:00,2016-07-14,56,2
		435,"Subject 12",2,"0112",2016-07-14 17:33:53,111.6402,81.4359,0.5,0.73,0.01,2.57,NA,NA,1133,14,NA,NA,0,2016-07-14 17:00:00,2016-07-14,56,2
		436,"Subject 12",2,"0112",2016-07-14 18:01:53,112.4382,82.6728,0.5,0.735,0,2.57,NA,NA,1094,88,NA,NA,0,2016-07-14 18:00:00,2016-07-14,57,2
		437,"Subject 12",2,"0112",2016-07-14 18:29:53,113.4756,83.8698,0.5,0.739,0,2.57,NA,NA,1291,245,NA,NA,0,2016-07-14 18:00:00,2016-07-14,57,2
		438,"Subject 12",2,"0112",2016-07-14 18:57:53,117.1464,85.2663,0.6,0.728,0,2.57,NA,NA,350,35,NA,NA,0,2016-07-14 18:00:00,2016-07-14,57,2
		439,"Subject 12",2,"0112",2016-07-14 19:25:53,127.3608,93.2064,0.6,0.732,0.02,2.59,NA,NA,1280,237,NA,NA,0,2016-07-14 19:00:00,2016-07-14,58,2
		440,"Subject 12",2,"0112",2016-07-14 19:53:53,124.488,91.0917,0.6,0.732,-0.01,2.58,NA,NA,2276,482,NA,NA,0,2016-07-14 19:00:00,2016-07-14,58,2
		441,"Subject 12",2,"0112",2016-07-14 20:21:53,116.7474,84.3885,0.5,0.723,0,2.58,NA,NA,1872,303,NA,NA,0,2016-07-14 20:00:00,2016-07-14,59,2
		442,"Subject 12",2,"0112",2016-07-14 20:49:53,113.9544,84.0294,0.5,0.737,0.01,2.59,NA,NA,1126,55,NA,NA,0,2016-07-14 20:00:00,2016-07-14,59,2
		443,"Subject 12",2,"0112",2016-07-14 21:17:53,113.9145,82.5132,0.5,0.724,0,2.59,NA,NA,671,23,NA,NA,0,2016-07-14 21:00:00,2016-07-14,60,2
		444,"Subject 12",2,"0112",2016-07-14 21:45:53,121.0167,90.4134,0.6,0.747,0.03,2.62,NA,NA,2460,572,NA,NA,0,2016-07-14 21:00:00,2016-07-14,60,2
		445,"Subject 12",2,"0112",2016-07-14 22:13:53,113.9145,83.3112,0.5,0.731,0,2.62,NA,NA,1629,249,NA,NA,0,2016-07-14 22:00:00,2016-07-14,61,2
		446,"Subject 12",2,"0112",2016-07-14 22:41:53,112.8372,82.5132,0.5,0.731,0,2.62,NA,NA,537,50,NA,NA,0,2016-07-14 22:00:00,2016-07-14,61,2
		447,"Subject 12",2,"0112",2016-07-14 23:09:53,117.7449,86.0643,0.6,0.731,0.03,2.65,NA,NA,716,117,NA,NA,0,2016-07-14 23:00:00,2016-07-14,62,2
		448,"Subject 12",2,"0112",2016-07-14 23:37:53,120.2985,90.2937,0.6,0.751,0,2.65,NA,NA,4123,1318,NA,NA,0,2016-07-14 23:00:00,2016-07-14,62,2
		449,"Subject 12",2,"0112",2016-07-15 00:05:53,120.099,87.78,0.6,0.731,0,2.65,NA,NA,3919,784,NA,NA,0,2016-07-15 00:00:00,2016-07-15,63,3
		450,"Subject 12",2,"0112",2016-07-15 00:33:53,116.2686,84.987,0.5,0.731,-0.01,2.64,NA,NA,2489,248,NA,NA,0,2016-07-15 00:00:00,2016-07-15,63,3
		451,"Subject 12",2,"0112",2016-07-15 01:01:53,105.9744,78.204,0.5,0.738,0.01,2.65,NA,NA,2102,136,NA,NA,0,2016-07-15 01:00:00,2016-07-15,64,3
		452,"Subject 12",2,"0112",2016-07-15 01:29:53,113.8746,83.1117,0.5,0.73,0,2.65,NA,NA,2482,439,NA,NA,0,2016-07-15 01:00:00,2016-07-15,64,3
		453,"Subject 12",2,"0112",2016-07-15 01:57:53,116.3883,84.2289,0.5,0.724,0,2.65,NA,NA,2129,194,NA,NA,0,2016-07-15 01:00:00,2016-07-15,64,3
		454,"Subject 12",2,"0112",2016-07-15 02:25:53,113.715,81.6753,0.5,0.718,0,2.65,NA,NA,3644,750,NA,NA,0,2016-07-15 02:00:00,2016-07-15,65,3
		455,"Subject 12",2,"0112",2016-07-15 02:53:53,113.2761,81.1167,0.5,0.716,0,2.65,NA,NA,2593,312,NA,NA,0,2016-07-15 02:00:00,2016-07-15,65,3
		456,"Subject 12",2,"0112",2016-07-15 03:21:53,108.1689,80.2389,0.5,0.742,0,2.65,NA,NA,2204,60,NA,NA,0,2016-07-15 03:00:00,2016-07-15,66,3
		457,"Subject 12",2,"0112",2016-07-15 03:49:53,106.3734,78.0444,0.5,0.733,0.01,2.66,NA,NA,2140,122,NA,NA,0,2016-07-15 03:00:00,2016-07-15,66,3
		458,"Subject 12",2,"0112",2016-07-15 04:17:53,110.2836,80.4384,0.5,0.73,-0.01,2.65,NA,NA,3186,416,NA,NA,0,2016-07-15 04:00:00,2016-07-15,67,3
		459,"Subject 12",2,"0112",2016-07-15 04:45:53,119.8197,89.5755,0.6,0.747,0.03,2.68,NA,NA,4159,1025,NA,NA,0,2016-07-15 04:00:00,2016-07-15,67,3
		460,"Subject 12",2,"0112",2016-07-15 05:13:53,102.0642,75.411,0.5,0.739,0.01,2.69,NA,NA,3130,256,NA,NA,0,2016-07-15 05:00:00,2016-07-15,68,3
		461,"Subject 12",2,"0112",2016-07-15 05:41:53,106.4133,78.3636,0.5,0.736,-0.01,2.68,NA,NA,3539,496,NA,NA,0,2016-07-15 05:00:00,2016-07-15,68,3
		462,"Subject 12",2,"0112",2016-07-15 06:09:53,129.7548,94.8423,0.6,0.731,0.05,2.73,NA,NA,5482,2288,NA,NA,0,2016-07-15 06:00:00,2016-07-15,69,3
		463,"Subject 12",2,"0112",2016-07-15 06:37:53,98.8722,71.7801,0.5,0.726,0,2.73,NA,NA,1273,200,NA,NA,0,2016-07-15 06:00:00,2016-07-15,69,3
		464,"Subject 12",2,"0112",2016-07-15 07:05:53,107.1315,77.406,0.5,0.723,0,2.73,NA,NA,664,102,NA,NA,0,2016-07-15 07:00:00,2016-07-15,70,3
		465,"Subject 12",2,"0112",2016-07-15 07:33:53,101.9445,74.9721,0.5,0.736,0,2.73,NA,NA,735,98,NA,NA,0,2016-07-15 07:00:00,2016-07-15,70,3
		466,"Subject 12",2,"0112",2016-07-15 08:01:53,129.3957,98.7525,0.6,0.763,0.03,2.76,NA,NA,2402,401,NA,NA,0,2016-07-15 08:00:00,2016-07-15,71,3
		467,"Subject 12",2,"0112",2016-07-15 08:29:53,108.3285,77.8848,0.5,0.719,-0.01,2.75,NA,NA,1733,353,NA,NA,0,2016-07-15 08:00:00,2016-07-15,71,3
		468,"Subject 12",2,"0112",2016-07-15 08:57:53,97.8747,71.7402,0.5,0.733,0,2.75,NA,NA,196,15,NA,NA,0,2016-07-15 08:00:00,2016-07-15,71,3
		469,"Subject 12",2,"0112",2016-07-15 09:25:53,102.6228,76.0893,0.5,0.742,0.01,2.76,NA,NA,490,87,NA,NA,0,2016-07-15 09:00:00,2016-07-15,72,3
		470,"Subject 12",2,"0112",2016-07-15 09:53:53,93.7251,68.3886,0.4,0.73,-0.01,2.75,NA,NA,401,61,NA,NA,0,2016-07-15 09:00:00,2016-07-15,72,3
		471,"Subject 12",2,"0112",2016-07-15 10:21:53,125.5653,93.9645,0.6,0.748,0.03,2.78,NA,NA,2055,558,NA,NA,0,2016-07-15 10:00:00,2016-07-15,73,3
		472,"Subject 12",2,"0112",2016-07-15 10:49:53,100.1889,73.4958,0.5,0.734,-0.01,2.77,NA,NA,758,132,NA,NA,0,2016-07-15 10:00:00,2016-07-15,73,3
		473,"Subject 12",2,"0112",2016-07-15 11:17:53,128.6376,94.164,0.6,0.732,0,2.77,NA,NA,2005,638,NA,NA,0,2016-07-15 11:00:00,2016-07-15,74,3
		474,"Subject 12",2,"0112",2016-07-15 11:45:53,100.149,75.1716,0.5,0.751,0,2.77,NA,NA,1644,88,NA,NA,0,2016-07-15 11:00:00,2016-07-15,74,3
		475,"Subject 12",2,"0112",2016-07-15 12:13:53,102.3834,75.7701,0.5,0.74,0,2.77,NA,NA,86,19,NA,NA,0,2016-07-15 12:00:00,2016-07-15,75,3
		476,"Subject 12",2,"0112",2016-07-15 12:41:53,88.0992,63.5208,0.4,0.721,0,2.77,NA,NA,1334,193,NA,NA,0,2016-07-15 12:00:00,2016-07-15,75,3
		477,"Subject 12",2,"0112",2016-07-15 13:09:53,106.8921,78.5232,0.5,0.735,0,2.77,NA,NA,1624,253,NA,NA,0,2016-07-15 13:00:00,2016-07-15,76,3
		478,"Subject 12",2,"0112",2016-07-15 13:37:53,98.7924,72.3786,0.5,0.733,0,2.77,NA,NA,627,51,NA,NA,0,2016-07-15 13:00:00,2016-07-15,76,3
		479,"Subject 12",2,"0112",2016-07-15 14:05:53,99.7899,73.0569,0.5,0.732,0,2.77,NA,NA,763,107,NA,NA,0,2016-07-15 14:00:00,2016-07-15,77,3
		480,"Subject 12",2,"0112",2016-07-15 14:33:53,97.2762,71.7801,0.5,0.738,0,2.77,NA,NA,261,37,NA,NA,0,2016-07-15 14:00:00,2016-07-15,77,3
		481,"Subject 12",2,"0112",2016-07-15 15:01:53,111.2412,83.3511,0.5,0.749,0,2.77,NA,NA,596,72,NA,NA,0,2016-07-15 15:00:00,2016-07-15,78,3
		482,"Subject 12",2,"0112",2016-07-15 15:29:53,95.3211,70.4235,0.5,0.739,0,2.77,NA,NA,848,38,NA,NA,0,2016-07-15 15:00:00,2016-07-15,78,3
		483,"Subject 12",2,"0112",2016-07-15 15:57:53,100.3884,72.4983,0.5,0.722,0,2.77,NA,NA,575,37,NA,NA,0,2016-07-15 15:00:00,2016-07-15,78,3
		484,"Subject 12",2,"0112",2016-07-15 16:25:53,123.4905,92.6877,0.6,0.751,0.04,2.81,NA,NA,3407,1034,NA,NA,0,2016-07-15 16:00:00,2016-07-15,79,3
		485,"Subject 12",2,"0112",2016-07-15 16:53:53,97.8747,73.017,0.5,0.746,0.01,2.82,NA,NA,1260,51,NA,NA,0,2016-07-15 16:00:00,2016-07-15,79,3
		486,"Subject 12",2,"0112",2016-07-15 17:21:53,100.0293,74.4534,0.5,0.744,0,2.82,NA,NA,1586,49,NA,NA,0,2016-07-15 17:00:00,2016-07-15,80,3
		487,"Subject 12",2,"0112",2016-07-15 17:49:53,98.154,72.9771,0.5,0.743,0,2.82,NA,NA,1271,74,NA,NA,0,2016-07-15 17:00:00,2016-07-15,80,3
		488,"Subject 12",2,"0112",2016-07-15 18:17:53,123.0117,91.5705,0.6,0.745,0.04,2.86,NA,NA,3615,999,NA,NA,0,2016-07-15 18:00:00,2016-07-15,81,3
		489,"Subject 12",2,"0112",2016-07-15 18:45:53,100.7874,75.1317,0.5,0.745,0,2.86,NA,NA,1763,92,NA,NA,0,2016-07-15 18:00:00,2016-07-15,81,3
		490,"Subject 12",2,"0112",2016-07-15 19:13:53,138.6126,104.6577,0.7,0.755,0.05,2.91,NA,NA,4400,2286,NA,NA,0,2016-07-15 19:00:00,2016-07-15,82,3
		491,"Subject 12",2,"0112",2016-07-15 19:41:53,108.4881,79.8,0.5,0.735,0.02,2.93,NA,NA,2811,656,NA,NA,0,2016-07-15 19:00:00,2016-07-15,82,3
		492,"Subject 12",2,"0112",2016-07-15 20:09:53,104.4981,76.8075,0.5,0.735,0,2.93,NA,NA,418,48,NA,NA,0,2016-07-15 20:00:00,2016-07-15,83,3
		493,"Subject 12",2,"0112",2016-07-15 20:37:53,108.4083,81.3162,0.5,0.75,0.06,2.99,NA,NA,2268,618,NA,NA,0,2016-07-15 20:00:00,2016-07-15,83,3
		494,"Subject 12",2,"0112",2016-07-15 21:05:53,126.4431,95.9595,0.6,0.759,0.02,3.01,NA,NA,2621,385,NA,NA,0,2016-07-15 21:00:00,2016-07-15,84,3
		495,"Subject 12",2,"0112",2016-07-15 21:33:53,104.3784,76.9272,0.5,0.737,0,3.01,NA,NA,676,43,NA,NA,0,2016-07-15 21:00:00,2016-07-15,84,3
		496,"Subject 12",2,"0112",2016-07-15 22:01:53,122.2137,90.8523,0.6,0.743,0.03,3.04,NA,NA,1000,433,NA,NA,0,2016-07-15 22:00:00,2016-07-15,85,3
		497,"Subject 12",2,"0112",2016-07-15 22:29:53,119.8596,88.6179,0.6,0.739,0.04,3.08,NA,NA,2163,449,NA,NA,0,2016-07-15 22:00:00,2016-07-15,85,3
		498,"Subject 12",2,"0112",2016-07-15 22:57:53,112.4382,83.4309,0.5,0.742,0,3.08,NA,NA,949,30,NA,NA,0,2016-07-15 22:00:00,2016-07-15,85,3
		499,"Subject 12",2,"0112",2016-07-15 23:25:53,113.9943,84.2688,0.5,0.739,0.03,3.11,NA,NA,705,154,NA,NA,0,2016-07-15 23:00:00,2016-07-15,86,3
		500,"Subject 12",2,"0112",2016-07-15 23:53:53,124.2885,95.361,0.6,0.767,0.05,3.16,NA,NA,5425,2325,NA,NA,0,2016-07-15 23:00:00,2016-07-15,86,3
		501,"Subject 12",2,"0112",2016-07-16 00:21:53,99.3909,72.3786,0.5,0.728,0.01,3.17,NA,NA,1530,250,NA,NA,0,2016-07-16 00:00:00,2016-07-16,87,4
		502,"Subject 12",2,"0112",2016-07-16 00:49:53,108.4881,78.4434,0.5,0.723,-0.01,3.16,NA,NA,782,29,NA,NA,0,2016-07-16 00:00:00,2016-07-16,87,4
		503,"Subject 12",2,"0112",2016-07-16 01:17:53,123.8895,93.0069,0.6,0.751,0.04,3.2,NA,NA,2443,646,NA,NA,0,2016-07-16 01:00:00,2016-07-16,88,4
		504,"Subject 12",2,"0112",2016-07-16 01:45:53,103.1016,76.9272,0.5,0.746,0.01,3.21,NA,NA,1207,124,NA,NA,0,2016-07-16 01:00:00,2016-07-16,88,4
		505,"Subject 12",2,"0112",2016-07-16 02:13:53,108.1689,79.1616,0.5,0.732,0,3.21,NA,NA,436,39,NA,NA,0,2016-07-16 02:00:00,2016-07-16,89,4
		506,"Subject 12",2,"0112",2016-07-16 02:41:53,104.139,77.2065,0.5,0.741,0,3.21,NA,NA,1579,98,NA,NA,0,2016-07-16 02:00:00,2016-07-16,89,4
		507,"Subject 12",2,"0112",2016-07-16 03:09:53,123.1314,92.6079,0.6,0.752,0.04,3.25,NA,NA,2297,382,NA,NA,0,2016-07-16 03:00:00,2016-07-16,90,4
		508,"Subject 12",2,"0112",2016-07-16 03:37:53,123.8895,92.4882,0.6,0.747,0.02,3.27,NA,NA,1911,642,NA,NA,0,2016-07-16 03:00:00,2016-07-16,90,4
		509,"Subject 12",2,"0112",2016-07-16 04:05:53,102.4233,74.8125,0.5,0.73,0,3.27,NA,NA,1573,217,NA,NA,0,2016-07-16 04:00:00,2016-07-16,91,4
		510,"Subject 12",2,"0112",2016-07-16 04:33:53,111.0417,81.3561,0.5,0.733,0.03,3.3,NA,NA,912,152,NA,NA,0,2016-07-16 04:00:00,2016-07-16,91,4
		511,"Subject 12",2,"0112",2016-07-16 05:01:53,156.7272,123.4506,0.8,0.788,0.12,3.42,NA,NA,3771,1657,NA,NA,0,2016-07-16 05:00:00,2016-07-16,92,4
		512,"Subject 12",2,"0112",2016-07-16 05:29:53,125.9244,93.8847,0.6,0.746,-0.01,3.41,NA,NA,5763,2992,NA,NA,0,2016-07-16 05:00:00,2016-07-16,92,4
		513,"Subject 12",2,"0112",2016-07-16 05:57:53,138.0939,101.9046,0.7,0.738,0.04,3.45,NA,NA,4820,2045,NA,NA,0,2016-07-16 05:00:00,2016-07-16,92,4
		514,"Subject 12",2,"0112",2016-07-16 06:25:53,120.0591,88.8174,0.6,0.74,0.02,3.47,NA,NA,3863,1475,NA,NA,0,2016-07-16 06:00:00,2016-07-16,93,4
		515,"Subject 12",2,"0112",2016-07-16 06:53:53,105.8148,78.4434,0.5,0.741,-0.01,3.46,NA,NA,717,110,NA,NA,0,2016-07-16 06:00:00,2016-07-16,93,4
		516,"Subject 12",2,"0112",2016-07-16 07:21:53,99.9096,73.2165,0.5,0.733,0.01,3.47,NA,NA,808,64,NA,NA,0,2016-07-16 07:00:00,2016-07-16,94,4
		517,"Subject 12",2,"0112",2016-07-16 07:49:53,110.3634,81.795,0.5,0.741,0,3.47,NA,NA,1158,156,NA,NA,0,2016-07-16 07:00:00,2016-07-16,94,4
		518,"Subject 12",2,"0112",2016-07-16 08:17:53,98.9919,73.2963,0.5,0.741,0.02,3.49,NA,NA,3204,982,NA,NA,0,2016-07-16 08:00:00,2016-07-16,95,4
		519,"Subject 12",2,"0112",2016-07-16 08:45:53,99.8697,74.6529,0.5,0.747,0,3.49,NA,NA,1239,106,NA,NA,0,2016-07-16 08:00:00,2016-07-16,95,4
		520,"Subject 12",2,"0112",2016-07-16 09:13:53,97.755,74.5731,0.5,0.763,0.03,3.52,NA,NA,807,76,NA,NA,0,2016-07-16 09:00:00,2016-07-16,96,4
		521,"Subject 12",2,"0112",2016-07-16 09:41:53,97.4757,72.4584,0.5,0.743,0,3.52,NA,NA,1723,355,NA,NA,0,2016-07-16 09:00:00,2016-07-16,96,4
		522,"Subject 12",2,"0112",2016-07-16 10:09:53,96.1989,72.2589,0.5,0.751,0.01,3.53,NA,NA,844,65,NA,NA,0,2016-07-16 10:00:00,2016-07-16,97,4
		523,"Subject 12",2,"0112",2016-07-16 10:37:53,130.1937,97.2762,0.6,0.747,0.03,3.56,NA,NA,2782,1198,NA,NA,0,2016-07-16 10:00:00,2016-07-16,97,4
		524,"Subject 12",2,"0112",2016-07-16 11:05:53,93.8448,68.6679,0.4,0.732,0.01,3.57,NA,NA,1428,219,NA,NA,0,2016-07-16 11:00:00,2016-07-16,98,4
		525,"Subject 12",2,"0112",2016-07-16 11:33:53,99.351,73.3761,0.5,0.739,-0.01,3.56,NA,NA,298,40,NA,NA,0,2016-07-16 11:00:00,2016-07-16,98,4
		526,"Subject 12",2,"0112",2016-07-16 12:01:53,98.3934,74.8524,0.5,0.761,0.01,3.57,NA,NA,850,37,NA,NA,0,2016-07-16 12:00:00,2016-07-16,99,4
		527,"Subject 12",2,"0112",2016-07-16 12:29:53,97.8747,72.4185,0.5,0.74,-0.01,3.56,NA,NA,1284,372,NA,NA,0,2016-07-16 12:00:00,2016-07-16,99,4
		528,"Subject 12",2,"0112",2016-07-16 12:57:53,102.5829,75.2913,0.5,0.734,0.01,3.57,NA,NA,1332,263,NA,NA,0,2016-07-16 12:00:00,2016-07-16,99,4
		529,"Subject 12",2,"0112",2016-07-16 13:25:53,99.6702,73.2963,0.5,0.736,-0.01,3.56,NA,NA,1004,36,NA,NA,0,2016-07-16 13:00:00,2016-07-16,100,4
		530,"Subject 12",2,"0112",2016-07-16 13:53:53,106.3335,78.8823,0.5,0.742,0,3.56,NA,NA,1396,170,NA,NA,0,2016-07-16 13:00:00,2016-07-16,100,4
		531,"Subject 12",2,"0112",2016-07-16 14:21:53,97.2762,71.9397,0.5,0.739,-0.01,3.55,NA,NA,848,95,NA,NA,0,2016-07-16 14:00:00,2016-07-16,101,4
		532,"Subject 12",2,"0112",2016-07-16 14:49:53,97.755,71.9397,0.5,0.736,0.01,3.56,NA,NA,465,18,NA,NA,0,2016-07-16 14:00:00,2016-07-16,101,4
		533,"Subject 12",2,"0112",2016-07-16 15:17:53,91.8099,67.9497,0.4,0.74,0,3.56,NA,NA,392,71,NA,NA,0,2016-07-16 15:00:00,2016-07-16,102,4
		534,"Subject 12",2,"0112",2016-07-16 15:45:53,97.1964,71.8998,0.5,0.74,0,3.56,NA,NA,524,80,NA,NA,0,2016-07-16 15:00:00,2016-07-16,102,4
		535,"Subject 12",2,"0112",2016-07-16 16:13:53,117.306,87.4608,0.6,0.745,0.02,3.58,NA,NA,3469,810,NA,NA,0,2016-07-16 16:00:00,2016-07-16,103,4
		536,"Subject 12",2,"0112",2016-07-16 16:41:53,93.6852,69.2664,0.4,0.739,0,3.58,NA,NA,1079,25,NA,NA,0,2016-07-16 16:00:00,2016-07-16,103,4
		537,"Subject 12",2,"0112",2016-07-16 17:09:53,94.0842,69.6654,0.4,0.74,0,3.58,NA,NA,1528,29,NA,NA,0,2016-07-16 17:00:00,2016-07-16,104,4
		538,"Subject 12",2,"0112",2016-07-16 17:37:53,120.2985,90.2139,0.6,0.75,0.07,3.65,NA,NA,1634,428,NA,NA,0,2016-07-16 17:00:00,2016-07-16,104,4
		539,"Subject 12",2,"0112",2016-07-16 18:05:53,98.1939,74.8125,0.5,0.762,0.01,3.66,NA,NA,2435,668,NA,NA,0,2016-07-16 18:00:00,2016-07-16,105,4
		540,"Subject 12",2,"0112",2016-07-16 18:33:53,124.3284,93.6852,0.6,0.753,0.05,3.71,NA,NA,3787,1236,NA,NA,0,2016-07-16 18:00:00,2016-07-16,105,4
		541,"Subject 12",2,"0112",2016-07-16 19:01:53,103.5006,76.8075,0.5,0.742,0,3.71,NA,NA,942,128,NA,NA,0,2016-07-16 19:00:00,2016-07-16,106,4
		542,"Subject 12",2,"0112",2016-07-16 19:29:53,108.927,80.8773,0.5,0.742,0.05,3.76,NA,NA,4010,1347,NA,NA,0,2016-07-16 19:00:00,2016-07-16,106,4
		543,"Subject 12",2,"0112",2016-07-16 19:57:53,103.4208,77.007,0.5,0.745,0.08,3.84,NA,NA,2128,684,NA,NA,0,2016-07-16 19:00:00,2016-07-16,106,4
		544,"Subject 12",2,"0112",2016-07-16 20:25:53,121.2561,93.8448,0.6,0.774,0.07,3.91,NA,NA,1356,203,NA,NA,0,2016-07-16 20:00:00,2016-07-16,107,4
		545,"Subject 12",2,"0112",2016-07-16 20:53:53,124.1289,95.0418,0.6,0.766,0.01,3.92,NA,NA,2055,527,NA,NA,0,2016-07-16 20:00:00,2016-07-16,107,4
		546,"Subject 12",2,"0112",2016-07-16 21:21:53,103.3011,76.8474,0.5,0.744,0,3.92,NA,NA,840,33,NA,NA,0,2016-07-16 21:00:00,2016-07-16,108,4
		547,"Subject 12",2,"0112",2016-07-16 21:49:53,121.4157,92.4882,0.6,0.762,0.08,4,NA,NA,1904,242,NA,NA,0,2016-07-16 21:00:00,2016-07-16,108,4
		548,"Subject 12",2,"0112",2016-07-16 22:17:53,105.6552,80.4783,0.5,0.762,-0.01,3.99,NA,NA,1172,271,NA,NA,0,2016-07-16 22:00:00,2016-07-16,109,4
		549,"Subject 12",2,"0112",2016-07-16 22:45:53,120.2187,93.2064,0.6,0.775,0.06,4.05,NA,NA,1467,350,NA,NA,0,2016-07-16 22:00:00,2016-07-16,109,4
		550,"Subject 12",2,"0112",2016-07-16 23:13:53,98.0343,72.0195,0.5,0.735,0.01,4.06,NA,NA,1754,48,NA,NA,0,2016-07-16 23:00:00,2016-07-16,110,4
		551,"Subject 12",2,"0112",2016-07-16 23:41:53,101.0667,74.613,0.5,0.738,0,4.06,NA,NA,788,68,NA,NA,0,2016-07-16 23:00:00,2016-07-16,110,4
		552,"Subject 12",2,"0112",2016-07-17 00:09:53,103.8996,76.2489,0.5,0.734,0.03,4.09,NA,NA,2384,400,NA,NA,0,2016-07-17 00:00:00,2016-07-17,111,5
		553,"Subject 12",2,"0112",2016-07-17 00:37:53,101.0667,75.5706,0.5,0.748,0.01,4.1,NA,NA,551,63,NA,NA,0,2016-07-17 00:00:00,2016-07-17,111,5
		554,"Subject 12",2,"0112",2016-07-17 01:05:53,97.4757,72.4983,0.5,0.744,0.01,4.11,NA,NA,304,40,NA,NA,0,2016-07-17 01:00:00,2016-07-17,112,5
		555,"Subject 12",2,"0112",2016-07-17 01:33:53,130.473,99.5106,0.6,0.763,0.07,4.18,NA,NA,1514,447,NA,NA,0,2016-07-17 01:00:00,2016-07-17,112,5
		556,"Subject 12",2,"0112",2016-07-17 02:01:53,117.1464,86.8623,0.6,0.742,0,4.18,NA,NA,3915,1561,NA,NA,0,2016-07-17 02:00:00,2016-07-17,113,5
		557,"Subject 12",2,"0112",2016-07-17 02:29:53,98.7126,72.7776,0.5,0.737,0.01,4.19,NA,NA,686,47,NA,NA,0,2016-07-17 02:00:00,2016-07-17,113,5
		558,"Subject 12",2,"0112",2016-07-17 02:57:53,96.2388,71.1417,0.5,0.739,-0.01,4.18,NA,NA,1014,37,NA,NA,0,2016-07-17 02:00:00,2016-07-17,113,5
		559,"Subject 12",2,"0112",2016-07-17 03:25:53,121.5354,91.5705,0.6,0.753,0.05,4.23,NA,NA,2386,510,NA,NA,0,2016-07-17 03:00:00,2016-07-17,114,5
		560,"Subject 12",2,"0112",2016-07-17 03:53:53,95.0418,71.2215,0.5,0.75,0.01,4.24,NA,NA,871,45,NA,NA,0,2016-07-17 03:00:00,2016-07-17,114,5
		561,"Subject 12",2,"0112",2016-07-17 04:21:53,113.2761,86.2638,0.5,0.762,0.05,4.29,NA,NA,2738,809,NA,NA,0,2016-07-17 04:00:00,2016-07-17,115,5
		562,"Subject 12",2,"0112",2016-07-17 04:49:53,95.3211,71.82,0.5,0.753,0,4.29,NA,NA,1547,134,NA,NA,0,2016-07-17 04:00:00,2016-07-17,115,5
		563,"Subject 12",2,"0112",2016-07-17 05:17:53,104.2587,78.9222,0.5,0.757,0,4.29,NA,NA,1094,243,NA,NA,0,2016-07-17 05:00:00,2016-07-17,116,5
		564,"Subject 12",2,"0112",2016-07-17 05:45:53,116.2686,87.9396,0.6,0.756,0.07,4.36,NA,NA,6109,3107,NA,NA,0,2016-07-17 05:00:00,2016-07-17,116,5
		565,"Subject 12",2,"0112",2016-07-17 06:13:53,88.7376,65.5158,0.4,0.738,0,4.36,NA,NA,2239,338,NA,NA,0,2016-07-17 06:00:00,2016-07-17,117,5
		566,"Subject 12",2,"0112",2016-07-17 06:41:53,91.77,69.027,0.4,0.752,0.01,4.37,NA,NA,919,46,NA,NA,0,2016-07-17 06:00:00,2016-07-17,117,5
		567,"Subject 12",2,"0112",2016-07-17 07:09:53,116.4681,87.6204,0.6,0.752,0.03,4.4,NA,NA,2351,879,NA,NA,0,2016-07-17 07:00:00,2016-07-17,118,5
		568,"Subject 12",2,"0112",2016-07-17 07:37:53,87.1416,63.9996,0.4,0.734,0,4.4,NA,NA,1961,211,NA,NA,0,2016-07-17 07:00:00,2016-07-17,118,5
		569,"Subject 12",2,"0112",2016-07-17 08:05:53,93.5655,69.5058,0.4,0.743,0,4.4,NA,NA,1391,28,NA,NA,0,2016-07-17 08:00:00,2016-07-17,119,5
		570,"Subject 12",2,"0112",2016-07-17 08:33:53,87.4608,65.9148,0.4,0.754,0,4.4,NA,NA,1130,77,NA,NA,0,2016-07-17 08:00:00,2016-07-17,119,5
		571,"Subject 12",2,"0112",2016-07-17 09:01:53,106.134,80.7576,0.5,0.761,0,4.4,NA,NA,1493,166,NA,NA,0,2016-07-17 09:00:00,2016-07-17,120,5
		572,"Subject 12",2,"0112",2016-07-17 09:29:53,86.7027,64.0794,0.4,0.739,0,4.4,NA,NA,2945,90,NA,NA,0,2016-07-17 09:00:00,2016-07-17,120,5
		573,"Subject 12",2,"0112",2016-07-17 09:57:53,85.9446,64.7976,0.4,0.754,0.01,4.41,NA,NA,707,24,NA,NA,0,2016-07-17 09:00:00,2016-07-17,120,5
		574,"Subject 12",2,"0112",2016-07-17 10:25:53,90.4533,68.0295,0.4,0.752,-0.01,4.4,NA,NA,886,20,NA,NA,0,2016-07-17 10:00:00,2016-07-17,121,5
		575,"Subject 12",2,"0112",2016-07-17 10:53:53,86.2638,66.234,0.4,0.768,0.04,4.44,NA,NA,1092,144,NA,NA,0,2016-07-17 10:00:00,2016-07-17,121,5
		576,"Subject 12",2,"0112",2016-07-17 11:21:53,85.1067,63.4809,0.4,0.746,0,4.44,NA,NA,1063,92,NA,NA,0,2016-07-17 11:00:00,2016-07-17,122,5
		577,"Subject 12",2,"0112",2016-07-17 11:49:53,48.9972,33.117,0.2,0.676,0,4.44,NA,NA,1492,443,NA,NA,0,2016-07-17 11:00:00,2016-07-17,122,5
		578,"Subject 12",2,"0112",2016-07-17 12:17:53,98.2338,74.0544,0.5,0.754,0,4.44,NA,NA,531,49,NA,NA,0,2016-07-17 12:00:00,2016-07-17,123,5
		579,"Subject 12",2,"0112",2016-07-17 12:45:53,88.977,65.9547,0.4,0.741,-0.01,4.43,NA,NA,890,121,NA,NA,0,2016-07-17 12:00:00,2016-07-17,123,5
		580,"Subject 12",2,"0112",2016-07-17 13:13:53,84.1491,63.9198,0.4,0.76,0.01,4.44,NA,NA,591,66,NA,NA,0,2016-07-17 13:00:00,2016-07-17,124,5
		581,"Subject 12",2,"0112",2016-07-17 13:41:53,86.5431,64.5981,0.4,0.746,-0.01,4.43,NA,NA,811,92,NA,NA,0,2016-07-17 13:00:00,2016-07-17,124,5
		582,"Subject 12",2,"0112",2016-07-17 14:09:53,82.7526,61.5258,0.4,0.743,0,4.43,NA,NA,665,49,NA,NA,0,2016-07-17 14:00:00,2016-07-17,125,5
		583,"Subject 12",2,"0112",2016-07-17 14:37:53,82.6329,61.5258,0.4,0.745,0,4.43,NA,NA,507,29,NA,NA,0,2016-07-17 14:00:00,2016-07-17,125,5
		584,"Subject 12",2,"0112",2016-07-17 15:05:53,98.9919,72.4584,0.5,0.732,0,4.43,NA,NA,1583,254,NA,NA,0,2016-07-17 15:00:00,2016-07-17,126,5
		585,"Subject 12",2,"0112",2016-07-17 15:33:53,83.1516,61.3263,0.4,0.737,0.01,4.44,NA,NA,935,50,NA,NA,0,2016-07-17 15:00:00,2016-07-17,126,5
		586,"Subject 12",2,"0112",2016-07-17 16:01:53,82.0743,60.1692,0.4,0.733,-0.01,4.43,NA,NA,223,6,NA,NA,0,2016-07-17 16:00:00,2016-07-17,127,5
		587,"Subject 12",2,"0112",2016-07-17 16:29:53,79.6005,58.2141,0.4,0.731,-0.01,4.42,NA,NA,269,14,NA,NA,0,2016-07-17 16:00:00,2016-07-17,127,5
		588,"Subject 12",2,"0112",2016-07-17 16:57:53,108.129,80.3586,0.5,0.743,0.03,4.45,NA,NA,1881,368,NA,NA,0,2016-07-17 16:00:00,2016-07-17,127,5
		589,"Subject 12",2,"0112",2016-07-17 17:25:53,83.5506,62.0844,0.4,0.743,0.01,4.46,NA,NA,1416,197,NA,NA,0,2016-07-17 17:00:00,2016-07-17,128,5
		590,"Subject 12",2,"0112",2016-07-17 17:53:53,105.735,80.598,0.5,0.762,0.05,4.51,NA,NA,1433,314,NA,NA,0,2016-07-17 17:00:00,2016-07-17,128,5
		591,"Subject 12",2,"0112",2016-07-17 18:21:53,95.361,71.3811,0.5,0.749,0,4.51,NA,NA,2884,706,NA,NA,0,2016-07-17 18:00:00,2016-07-17,129,5
		592,"Subject 12",2,"0112",2016-07-17 18:49:53,89.775,66.5133,0.4,0.741,0,4.51,NA,NA,562,45,NA,NA,0,2016-07-17 18:00:00,2016-07-17,129,5
		593,"Subject 12",2,"0112",2016-07-17 19:17:53,87.4608,65.9946,0.4,0.755,0.05,4.56,NA,NA,2098,681,NA,NA,0,2016-07-17 19:00:00,2016-07-17,130,5
		594,"Subject 12",2,"0112",2016-07-17 19:45:53,90.0543,67.032,0.4,0.745,0,4.56,NA,NA,463,44,NA,NA,0,2016-07-17 19:00:00,2016-07-17,130,5
		595,"Subject 12",2,"0112",2016-07-17 20:13:53,88.0194,65.3163,0.4,0.742,0,4.56,NA,NA,1860,10,NA,NA,0,2016-07-17 20:00:00,2016-07-17,131,5
		596,"Subject 12",2,"0112",2016-07-17 20:41:53,89.376,66.5133,0.4,0.744,0.06,4.62,NA,NA,2846,876,NA,NA,0,2016-07-17 20:00:00,2016-07-17,131,5
		597,"Subject 12",2,"0112",2016-07-17 21:09:53,88.179,64.638,0.4,0.733,0.01,4.63,NA,NA,734,39,NA,NA,0,2016-07-17 21:00:00,2016-07-17,132,5
		598,"Subject 12",2,"0112",2016-07-17 21:37:53,87.0219,63.8001,0.4,0.733,0,4.63,NA,NA,286,33,NA,NA,0,2016-07-17 21:00:00,2016-07-17,132,5
		599,"Subject 12",2,"0112",2016-07-17 22:05:53,129.1962,96.9969,0.6,0.751,0.09,4.72,NA,NA,1549,769,NA,NA,0,2016-07-17 22:00:00,2016-07-17,133,5
		600,"Subject 12",2,"0112",2016-07-17 22:33:53,84.189,62.9622,0.4,0.748,0,4.72,NA,NA,1623,455,NA,NA,0,2016-07-17 22:00:00,2016-07-17,133,5
		601,"Subject 12",2,"0112",2016-07-17 23:01:53,85.8648,63.1218,0.4,0.735,0,4.72,NA,NA,433,7,NA,NA,0,2016-07-17 23:00:00,2016-07-17,134,5
		602,"Subject 12",2,"0112",2016-07-17 23:29:53,86.4234,64.3188,0.4,0.744,0,4.72,NA,NA,789,71,NA,NA,0,2016-07-17 23:00:00,2016-07-17,134,5
		603,"Subject 12",2,"0112",2016-07-17 23:57:53,88.4184,65.9148,0.4,0.746,0.05,4.77,NA,NA,3524,865,NA,NA,0,2016-07-17 23:00:00,2016-07-17,134,5
		604,"Subject 12",2,"0112",2016-07-18 00:25:53,83.5905,62.0046,0.4,0.742,-0.01,4.76,NA,NA,549,17,NA,NA,0,2016-07-18 00:00:00,2016-07-18,135,6
		605,"Subject 12",2,"0112",2016-07-18 00:53:53,80.199,58.8924,0.4,0.734,0.01,4.77,NA,NA,297,57,NA,NA,0,2016-07-18 00:00:00,2016-07-18,135,6
		606,"Subject 12",2,"0112",2016-07-18 01:21:53,82.7127,60.4086,0.4,0.73,0,4.77,NA,NA,954,52,NA,NA,0,2016-07-18 01:00:00,2016-07-18,136,6
		607,"Subject 12",2,"0112",2016-07-18 01:49:53,108.0492,81.5157,0.5,0.754,-0.02,4.75,NA,NA,1353,383,NA,NA,0,2016-07-18 01:00:00,2016-07-18,136,6
		608,"Subject 12",2,"0112",2016-07-18 02:17:53,78.0444,58.0545,0.4,0.744,0.01,4.76,NA,NA,1190,165,NA,NA,0,2016-07-18 02:00:00,2016-07-18,137,6
		609,"Subject 12",2,"0112",2016-07-18 02:45:53,114.5928,89.2164,0.5,0.778,0.12,4.88,NA,NA,3691,1148,NA,NA,0,2016-07-18 02:00:00,2016-07-18,137,6
		610,"Subject 12",2,"0112",2016-07-18 03:13:53,80.199,60.2091,0.4,0.751,0.01,4.89,NA,NA,1449,223,NA,NA,0,2016-07-18 03:00:00,2016-07-18,138,6
		611,"Subject 12",2,"0112",2016-07-18 03:41:53,82.194,61.7253,0.4,0.751,-0.01,4.88,NA,NA,689,66,NA,NA,0,2016-07-18 03:00:00,2016-07-18,138,6
		612,"Subject 12",2,"0112",2016-07-18 04:09:53,85.2264,64.1193,0.4,0.752,0,4.88,NA,NA,871,141,NA,NA,0,2016-07-18 04:00:00,2016-07-18,139,6
		613,"Subject 12",2,"0112",2016-07-18 04:37:53,96.3984,72.618,0.5,0.753,0.01,4.89,NA,NA,1876,408,NA,NA,0,2016-07-18 04:00:00,2016-07-18,139,6
		614,"Subject 12",2,"0112",2016-07-18 05:05:53,96.3186,72.0195,0.5,0.748,0,4.89,NA,NA,2278,405,NA,NA,0,2016-07-18 05:00:00,2016-07-18,140,6
		615,"Subject 12",2,"0112",2016-07-18 05:33:53,104.3784,80.5182,0.5,0.771,0.07,4.96,NA,NA,2797,838,NA,NA,0,2016-07-18 05:00:00,2016-07-18,140,6
		616,"Subject 12",2,"0112",2016-07-18 06:01:53,119.5005,92.6478,0.6,0.775,0.12,5.08,NA,NA,2696,929,NA,NA,0,2016-07-18 06:00:00,2016-07-18,141,6
		617,"Subject 12",2,"0112",2016-07-18 06:29:53,102.543,78.0444,0.5,0.761,0.02,5.1,NA,NA,3820,1303,NA,NA,0,2016-07-18 06:00:00,2016-07-18,141,6
		618,"Subject 12",2,"0112",2016-07-18 06:57:53,85.8249,64.5981,0.4,0.752,-0.01,5.09,NA,NA,1631,162,NA,NA,0,2016-07-18 06:00:00,2016-07-18,141,6
		619,"Subject 12",2,"0112",2016-07-18 07:25:53,84.189,66.234,0.4,0.787,0.05,5.14,NA,NA,1623,406,NA,NA,0,2016-07-18 07:00:00,2016-07-18,142,6
		620,"Subject 12",2,"0112",2016-07-18 07:53:53,87.78,68.2689,0.4,0.778,0,5.14,NA,NA,804,53,NA,NA,0,2016-07-18 07:00:00,2016-07-18,142,6
		621,"Subject 12",2,"0112",2016-07-18 08:21:53,83.1516,63.3213,0.4,0.761,0.06,5.2,NA,NA,3199,870,NA,NA,0,2016-07-18 08:00:00,2016-07-18,143,6
		622,"Subject 12",2,"0112",2016-07-18 08:49:53,84.3486,65.6355,0.4,0.778,0,5.2,NA,NA,413,20,NA,NA,0,2016-07-18 08:00:00,2016-07-18,143,6
		623,"Subject 12",2,"0112",2016-07-18 09:17:53,85.8249,63.8001,0.4,0.743,0,5.2,NA,NA,1458,87,NA,NA,0,2016-07-18 09:00:00,2016-07-18,144,6
		624,"Subject 12",2,"0112",2016-07-18 09:45:53,109.6053,87.2214,0.5,0.796,0.05,5.25,NA,NA,1604,286,NA,NA,0,2016-07-18 09:00:00,2016-07-18,144,6
		625,"Subject 12",2,"0112",2016-07-18 10:13:53,89.0967,67.5507,0.4,0.758,0,5.25,NA,NA,1332,253,NA,NA,0,2016-07-18 10:00:00,2016-07-18,145,6
		626,"Subject 12",2,"0112",2016-07-18 10:41:53,104.4981,77.6853,0.5,0.743,0,5.25,NA,NA,1545,57,NA,NA,0,2016-07-18 10:00:00,2016-07-18,145,6
		627,"Subject 12",2,"0112",NA,0,0,0,0,0,0,NA,NA,0,0,NA,NA,0,NA,NA,NA,NA
		628,"Subject 12",2,NA,NA,NA,NA,NA,NA,NA,NA,NA,NA,NA,NA,NA,NA,NA,NA,NA,NA,NA
		629,"Subject 7",3,"0107",2016-07-12 09:23:53,147.9625,118.904,0.7,0.804,0,0,NA,NA,3268,2556,NA,NA,0,2016-07-12 09:00:00,2016-07-12,0,0
		630,"Subject 7",3,"0107",2016-07-12 09:51:53,96.031,75.8725,0.5,0.79,0,0,NA,NA,1856,1284,NA,NA,0,2016-07-12 09:00:00,2016-07-12,0,0
		631,"Subject 7",3,"0107",2016-07-12 10:19:53,109.114,89.6675,0.5,0.822,0,0,NA,NA,1857,1059,NA,NA,0,2016-07-12 10:00:00,2016-07-12,1,0
		632,"Subject 7",3,"0107",2016-07-12 10:47:53,96.8765,75.472,0.5,0.779,0,0,NA,NA,3085,1630,NA,NA,0,2016-07-12 10:00:00,2016-07-12,1,0
		633,"Subject 7",3,"0107",2016-07-12 11:15:53,85.9295,68.5745,0.4,0.798,0,0,NA,NA,433,288,NA,NA,0,2016-07-12 11:00:00,2016-07-12,2,0
		634,"Subject 7",3,"0107",2016-07-12 11:43:53,87.843,69.776,0.4,0.795,0,0,NA,NA,2610,1195,NA,NA,0,2016-07-12 11:00:00,2016-07-12,2,0
		635,"Subject 7",3,"0107",2016-07-12 12:11:53,97.3215,78.854,0.5,0.81,0,0,NA,NA,2024,1188,NA,NA,0,2016-07-12 12:00:00,2016-07-12,3,0
		636,"Subject 7",3,"0107",2016-07-12 12:39:53,89.7565,69.6425,0.4,0.776,0,0,NA,NA,2444,1464,NA,NA,0,2016-07-12 12:00:00,2016-07-12,3,0
		637,"Subject 7",3,"0107",2016-07-12 13:07:53,82.058,63.546,0.4,0.774,0,0,NA,NA,365,131,NA,NA,0,2016-07-12 13:00:00,2016-07-12,4,0
		638,"Subject 7",3,"0107",2016-07-12 13:35:53,79.3435,60.7425,0.4,0.765,0,0,NA,NA,4876,2935,NA,NA,0,2016-07-12 13:00:00,2016-07-12,4,0
		639,"Subject 7",3,"0107",2016-07-12 14:03:53,83.3485,62.745,0.4,0.753,0,0,NA,NA,1557,710,NA,NA,0,2016-07-12 14:00:00,2016-07-12,5,0
		640,"Subject 7",3,"0107",2016-07-12 14:31:53,81.88,62.9675,0.4,0.769,0,0,NA,NA,665,174,NA,NA,0,2016-07-12 14:00:00,2016-07-12,5,0
		641,"Subject 7",3,"0107",2016-07-12 14:59:53,84.728,64.3025,0.4,0.759,0,0,NA,NA,1540,881,NA,NA,0,2016-07-12 14:00:00,2016-07-12,5,0
		642,"Subject 7",3,"0107",2016-07-12 15:27:53,101.2375,78.32,0.5,0.773,0.01,0.01,NA,NA,1913,864,NA,NA,0,2016-07-12 15:00:00,2016-07-12,6,0
		643,"Subject 7",3,"0107",2016-07-12 15:55:53,79.9665,60.698,0.4,0.759,-0.01,0,NA,NA,833,120,NA,NA,0,2016-07-12 15:00:00,2016-07-12,6,0
		644,"Subject 7",3,"0107",2016-07-12 16:23:53,79.922,62.0775,0.4,0.777,0,0,NA,NA,119,8,NA,NA,0,2016-07-12 16:00:00,2016-07-12,7,0
		645,"Subject 7",3,"0107",2016-07-12 16:51:53,78.854,60.609,0.4,0.769,0,0,NA,NA,108,11,NA,NA,0,2016-07-12 16:00:00,2016-07-12,7,0
		646,"Subject 7",3,"0107",2016-07-12 17:19:53,89.623,70.7995,0.4,0.79,0,0,NA,NA,450,75,NA,NA,0,2016-07-12 17:00:00,2016-07-12,8,0
		647,"Subject 7",3,"0107",2016-07-12 17:47:53,78.053,58.0725,0.4,0.744,0,0,NA,NA,1262,181,NA,NA,0,2016-07-12 17:00:00,2016-07-12,8,0
		648,"Subject 7",3,"0107",2016-07-12 18:15:53,97.4105,74.76,0.5,0.767,0,0,NA,NA,1425,347,NA,NA,0,2016-07-12 18:00:00,2016-07-12,9,0
		649,"Subject 7",3,"0107",2016-07-12 18:43:53,108.224,90.9135,0.5,0.84,0.11,0.11,NA,NA,4345,1824,NA,NA,0,2016-07-12 18:00:00,2016-07-12,9,0
		650,"Subject 7",3,"0107",2016-07-12 19:11:53,121.7075,95.2745,0.6,0.783,0.04,0.15,NA,NA,2497,692,NA,NA,0,2016-07-12 19:00:00,2016-07-12,10,0
		651,"Subject 7",3,"0107",2016-07-12 19:39:53,96.0755,76.273,0.5,0.794,0.11,0.26,NA,NA,2881,958,NA,NA,0,2016-07-12 19:00:00,2016-07-12,10,0
		652,"Subject 7",3,"0107",2016-07-12 20:07:53,127.2255,97.7665,0.6,0.768,0.1,0.36,NA,NA,3857,1930,NA,NA,0,2016-07-12 20:00:00,2016-07-12,11,0
		653,"Subject 7",3,"0107",2016-07-12 20:35:53,109.915,87.131,0.5,0.793,0.08,0.44,NA,NA,3615,1382,NA,NA,0,2016-07-12 20:00:00,2016-07-12,11,0
		654,"Subject 7",3,"0107",2016-07-12 21:03:53,139.6855,113.2525,0.7,0.811,0.03,0.47,NA,NA,3156,1494,NA,NA,0,2016-07-12 21:00:00,2016-07-12,12,0
		655,"Subject 7",3,"0107",2016-07-12 21:31:53,123.8435,101.6825,0.6,0.821,0.14,0.61,NA,NA,6771,3596,NA,NA,0,2016-07-12 21:00:00,2016-07-12,12,0
		656,"Subject 7",3,"0107",2016-07-12 21:59:53,123.6655,99.947,0.6,0.808,0.01,0.62,NA,NA,2656,839,NA,NA,0,2016-07-12 21:00:00,2016-07-12,12,0
		657,"Subject 7",3,"0107",2016-07-12 22:27:53,113.208,93.4055,0.5,0.825,0.14,0.76,NA,NA,6682,3586,NA,NA,0,2016-07-12 22:00:00,2016-07-12,13,0
		658,"Subject 7",3,"0107",2016-07-12 22:55:53,110.7605,90.0235,0.5,0.813,0.05,0.81,NA,NA,1658,402,NA,NA,0,2016-07-12 22:00:00,2016-07-12,13,0
		659,"Subject 7",3,"0107",2016-07-12 23:23:53,110.4045,92.204,0.5,0.835,0.09,0.9,NA,NA,6392,3391,NA,NA,0,2016-07-12 23:00:00,2016-07-12,14,0
		660,"Subject 7",3,"0107",2016-07-12 23:51:53,127.0475,105.2425,0.6,0.828,0.08,0.98,NA,NA,2355,1028,NA,NA,0,2016-07-12 23:00:00,2016-07-12,14,0
		661,"Subject 7",3,"0107",2016-07-13 00:19:53,89,72.802,0.4,0.818,0.07,1.05,NA,NA,2220,898,NA,NA,0,2016-07-13 00:00:00,2016-07-13,15,1
		662,"Subject 7",3,"0107",2016-07-13 00:47:53,125.1785,101.282,0.6,0.809,0.08,1.13,NA,NA,3048,1392,NA,NA,0,2016-07-13 00:00:00,2016-07-13,15,1
		663,"Subject 7",3,"0107",2016-07-13 01:15:53,88.0655,70.2655,0.4,0.798,-0.01,1.12,NA,NA,828,98,NA,NA,0,2016-07-13 01:00:00,2016-07-13,16,1
		664,"Subject 7",3,"0107",2016-07-13 01:43:53,121.663,99.1015,0.6,0.815,0.16,1.28,NA,NA,2326,1098,NA,NA,0,2016-07-13 01:00:00,2016-07-13,16,1
		665,"Subject 7",3,"0107",2016-07-13 02:11:53,94.518,76.273,0.5,0.807,0.02,1.3,NA,NA,1978,267,NA,NA,0,2016-07-13 02:00:00,2016-07-13,17,1
		666,"Subject 7",3,"0107",2016-07-13 02:39:53,85.4845,66.216,0.4,0.775,0,1.3,NA,NA,905,137,NA,NA,0,2016-07-13 02:00:00,2016-07-13,17,1
		667,"Subject 7",3,"0107",2016-07-13 03:07:53,105.1535,88.9555,0.5,0.846,0.13,1.43,NA,NA,1338,199,NA,NA,0,2016-07-13 03:00:00,2016-07-13,18,1
		668,"Subject 7",3,"0107",2016-07-13 03:35:53,96.12,78.8095,0.5,0.82,0,1.43,NA,NA,1677,152,NA,NA,0,2016-07-13 03:00:00,2016-07-13,18,1
		669,"Subject 7",3,"0107",2016-07-13 04:03:53,85.2175,67.551,0.4,0.792,0,1.43,NA,NA,391,40,NA,NA,0,2016-07-13 04:00:00,2016-07-13,19,1
		670,"Subject 7",3,"0107",2016-07-13 04:31:53,104.664,89.267,0.5,0.853,0.14,1.57,NA,NA,2896,985,NA,NA,0,2016-07-13 04:00:00,2016-07-13,19,1
		671,"Subject 7",3,"0107",2016-07-13 04:59:53,87.5315,69.064,0.4,0.789,-0.01,1.56,NA,NA,987,201,NA,NA,0,2016-07-13 04:00:00,2016-07-13,19,1
		672,"Subject 7",3,"0107",2016-07-13 05:27:53,91.9815,76.4065,0.4,0.831,0.07,1.63,NA,NA,839,135,NA,NA,0,2016-07-13 05:00:00,2016-07-13,20,1
		673,"Subject 7",3,"0107",2016-07-13 05:55:53,91.9815,72.179,0.4,0.785,0.11,1.74,NA,NA,2015,414,NA,NA,0,2016-07-13 05:00:00,2016-07-13,20,1
		674,"Subject 7",3,"0107",2016-07-13 06:23:53,89.445,69.1975,0.4,0.774,0,1.74,NA,NA,2522,868,NA,NA,0,2016-07-13 06:00:00,2016-07-13,21,1
		675,"Subject 7",3,"0107",2016-07-13 06:51:53,86.3745,67.4175,0.4,0.78,0,1.74,NA,NA,194,13,NA,NA,0,2016-07-13 06:00:00,2016-07-13,21,1
		676,"Subject 7",3,"0107",2016-07-13 07:19:53,86.6415,66.394,0.4,0.766,0,1.74,NA,NA,1057,57,NA,NA,0,2016-07-13 07:00:00,2016-07-13,22,1
		677,"Subject 7",3,"0107",2016-07-13 07:47:53,99.9915,81.0345,0.5,0.81,0.08,1.82,NA,NA,1826,214,NA,NA,0,2016-07-13 07:00:00,2016-07-13,22,1
		678,"Subject 7",3,"0107",2016-07-13 08:15:53,80.9455,64.5695,0.4,0.798,-0.01,1.81,NA,NA,1579,19,NA,NA,0,2016-07-13 08:00:00,2016-07-13,23,1
		679,"Subject 7",3,"0107",2016-07-13 08:43:53,86.063,67.996,0.4,0.79,0.01,1.82,NA,NA,1241,133,NA,NA,0,2016-07-13 08:00:00,2016-07-13,23,1
		680,"Subject 7",3,"0107",2016-07-13 09:11:53,92.204,75.6055,0.4,0.82,0.03,1.85,NA,NA,1438,182,NA,NA,0,2016-07-13 09:00:00,2016-07-13,24,1
		681,"Subject 7",3,"0107",2016-07-13 09:39:53,87.665,71.734,0.4,0.818,0.03,1.88,NA,NA,1695,259,NA,NA,0,2016-07-13 09:00:00,2016-07-13,24,1
		682,"Subject 7",3,"0107",2016-07-13 10:07:53,79.8775,63.101,0.4,0.79,0.01,1.89,NA,NA,1158,31,NA,NA,0,2016-07-13 10:00:00,2016-07-13,25,1
		683,"Subject 7",3,"0107",2016-07-13 10:35:53,87.131,69.776,0.4,0.801,0.04,1.93,NA,NA,367,37,NA,NA,0,2016-07-13 10:00:00,2016-07-13,25,1
		684,"Subject 7",3,"0107",2016-07-13 11:03:53,82.236,64.3915,0.4,0.783,0.01,1.94,NA,NA,919,132,NA,NA,0,2016-07-13 11:00:00,2016-07-13,26,1
		685,"Subject 7",3,"0107",2016-07-13 11:31:53,81.9245,68.708,0.4,0.839,0.13,2.07,NA,NA,945,175,NA,NA,0,2016-07-13 11:00:00,2016-07-13,26,1
		686,"Subject 7",3,"0107",2016-07-13 11:59:53,77.252,62.3,0.4,0.807,0.01,2.08,NA,NA,674,129,NA,NA,0,2016-07-13 11:00:00,2016-07-13,26,1
		687,"Subject 7",3,"0107",2016-07-13 12:27:53,104.219,87.7095,0.5,0.842,0.04,2.12,NA,NA,1336,447,NA,NA,0,2016-07-13 12:00:00,2016-07-13,27,1
		688,"Subject 7",3,"0107",2016-07-13 12:55:53,91.225,72.09,0.4,0.79,-0.01,2.11,NA,NA,1156,121,NA,NA,0,2016-07-13 12:00:00,2016-07-13,27,1
		689,"Subject 7",3,"0107",2016-07-13 13:23:53,84.461,66.8835,0.4,0.792,0,2.11,NA,NA,433,42,NA,NA,0,2016-07-13 13:00:00,2016-07-13,28,1
		690,"Subject 7",3,"0107",2016-07-13 13:51:53,106.266,90.0235,0.5,0.847,0.08,2.19,NA,NA,1524,318,NA,NA,0,2016-07-13 13:00:00,2016-07-13,28,1
		691,"Subject 7",3,"0107",2016-07-13 14:19:53,88.0655,70.3545,0.4,0.799,0,2.19,NA,NA,591,186,NA,NA,0,2016-07-13 14:00:00,2016-07-13,29,1
		692,"Subject 7",3,"0107",2016-07-13 14:47:53,56.604,42.186,0.3,0.746,0,2.19,NA,NA,1507,291,NA,NA,0,2016-07-13 14:00:00,2016-07-13,29,1
		693,"Subject 7",3,"0107",2016-07-13 15:15:53,93.2275,69.687,0.4,0.748,0,2.19,NA,NA,630,60,NA,NA,0,2016-07-13 15:00:00,2016-07-13,30,1
		694,"Subject 7",3,"0107",2016-07-13 15:43:53,90.4685,67.907,0.4,0.751,0,2.19,NA,NA,705,248,NA,NA,0,2016-07-13 15:00:00,2016-07-13,30,1
		695,"Subject 7",3,"0107",2016-07-13 16:11:53,82.681,62.5225,0.4,0.756,-0.01,2.18,NA,NA,1271,257,NA,NA,0,2016-07-13 16:00:00,2016-07-13,31,1
		696,"Subject 7",3,"0107",2016-07-13 16:39:53,82.0135,62.567,0.4,0.763,0,2.18,NA,NA,1109,30,NA,NA,0,2016-07-13 16:00:00,2016-07-13,31,1
		697,"Subject 7",3,"0107",2016-07-13 17:07:53,82.948,65.1925,0.4,0.786,0.01,2.19,NA,NA,627,125,NA,NA,0,2016-07-13 17:00:00,2016-07-13,32,1
		698,"Subject 7",3,"0107",2016-07-13 17:35:53,85.796,65.3705,0.4,0.762,-0.01,2.18,NA,NA,2029,214,NA,NA,0,2016-07-13 17:00:00,2016-07-13,32,1
		699,"Subject 7",3,"0107",2016-07-13 18:03:53,85.6625,65.6375,0.4,0.766,0,2.18,NA,NA,782,166,NA,NA,0,2016-07-13 18:00:00,2016-07-13,33,1
		700,"Subject 7",3,"0107",2016-07-13 18:31:53,87.754,66.394,0.4,0.756,0.01,2.19,NA,NA,560,150,NA,NA,0,2016-07-13 18:00:00,2016-07-13,33,1
		701,"Subject 7",3,"0107",2016-07-13 18:59:53,95.052,72.0455,0.5,0.758,0,2.19,NA,NA,962,228,NA,NA,0,2016-07-13 18:00:00,2016-07-13,33,1
		702,"Subject 7",3,"0107",2016-07-13 19:27:53,93.3165,70.7995,0.4,0.759,0,2.19,NA,NA,834,196,NA,NA,0,2016-07-13 19:00:00,2016-07-13,34,1
		703,"Subject 7",3,"0107",2016-07-13 19:55:53,94.7405,71.378,0.4,0.754,0,2.19,NA,NA,1002,69,NA,NA,0,2016-07-13 19:00:00,2016-07-13,34,1
		704,"Subject 7",3,"0107",2016-07-13 20:23:53,91.0915,68.3965,0.4,0.751,0,2.19,NA,NA,755,175,NA,NA,0,2016-07-13 20:00:00,2016-07-13,35,1
		705,"Subject 7",3,"0107",2016-07-13 20:51:53,92.4265,69.6425,0.4,0.754,0.01,2.2,NA,NA,578,48,NA,NA,0,2016-07-13 20:00:00,2016-07-13,35,1
		706,"Subject 7",3,"0107",2016-07-13 21:19:53,90.068,68.53,0.4,0.761,-0.01,2.19,NA,NA,834,201,NA,NA,0,2016-07-13 21:00:00,2016-07-13,36,1
		707,"Subject 7",3,"0107",2016-07-13 21:47:53,90.3795,68.619,0.4,0.759,0.01,2.2,NA,NA,218,15,NA,NA,0,2016-07-13 21:00:00,2016-07-13,36,1
		708,"Subject 7",3,"0107",2016-07-13 22:15:53,89.8455,68.975,0.4,0.768,-0.01,2.19,NA,NA,929,35,NA,NA,0,2016-07-13 22:00:00,2016-07-13,37,1
		709,"Subject 7",3,"0107",2016-07-13 22:43:53,93.094,71.0665,0.4,0.763,0.01,2.2,NA,NA,1084,197,NA,NA,0,2016-07-13 22:00:00,2016-07-13,37,1
		710,"Subject 7",3,"0107",2016-07-13 23:11:53,93.628,71.6895,0.4,0.766,-0.01,2.19,NA,NA,879,150,NA,NA,0,2016-07-13 23:00:00,2016-07-13,38,1
		711,"Subject 7",3,"0107",2016-07-13 23:39:53,89.801,69.1085,0.4,0.77,0,2.19,NA,NA,620,37,NA,NA,0,2016-07-13 23:00:00,2016-07-13,38,1
		712,"Subject 7",3,"0107",2016-07-14 00:07:53,88.466,66.75,0.4,0.755,0,2.19,NA,NA,334,19,NA,NA,0,2016-07-14 00:00:00,2016-07-14,39,2
		713,"Subject 7",3,"0107",2016-07-14 00:35:53,89.623,67.5955,0.4,0.754,0,2.19,NA,NA,285,15,NA,NA,0,2016-07-14 00:00:00,2016-07-14,39,2
		714,"Subject 7",3,"0107",2016-07-14 01:03:53,93.094,69.9095,0.4,0.751,0.01,2.2,NA,NA,432,33,NA,NA,0,2016-07-14 01:00:00,2016-07-14,40,2
		715,"Subject 7",3,"0107",2016-07-14 01:31:53,91.7145,69.687,0.4,0.76,-0.01,2.19,NA,NA,1081,248,NA,NA,0,2016-07-14 01:00:00,2016-07-14,40,2
		716,"Subject 7",3,"0107",2016-07-14 01:59:53,88.6885,65.9045,0.4,0.743,0,2.19,NA,NA,331,47,NA,NA,0,2016-07-14 01:00:00,2016-07-14,40,2
		717,"Subject 7",3,"0107",2016-07-14 02:27:53,92.5155,70.0875,0.4,0.757,0,2.19,NA,NA,439,45,NA,NA,0,2016-07-14 02:00:00,2016-07-14,41,2
		718,"Subject 7",3,"0107",2016-07-14 02:55:53,95.942,72.09,0.5,0.751,0,2.19,NA,NA,1520,449,NA,NA,0,2016-07-14 02:00:00,2016-07-14,41,2
		719,"Subject 7",3,"0107",2016-07-14 03:23:53,90.068,68.352,0.4,0.759,0,2.19,NA,NA,291,63,NA,NA,0,2016-07-14 03:00:00,2016-07-14,42,2
		720,"Subject 7",3,"0107",2016-07-14 03:51:53,90.2905,67.7735,0.4,0.751,0,2.19,NA,NA,557,91,NA,NA,0,2016-07-14 03:00:00,2016-07-14,42,2
		721,"Subject 7",3,"0107",2016-07-14 04:19:53,93.895,72.2235,0.4,0.769,0,2.19,NA,NA,906,128,NA,NA,0,2016-07-14 04:00:00,2016-07-14,43,2
		722,"Subject 7",3,"0107",2016-07-14 04:47:53,91.759,68.7525,0.4,0.749,0,2.19,NA,NA,392,65,NA,NA,0,2016-07-14 04:00:00,2016-07-14,43,2
		723,"Subject 7",3,"0107",2016-07-14 05:15:53,85.3955,64.08,0.4,0.75,0,2.19,NA,NA,876,35,NA,NA,0,2016-07-14 05:00:00,2016-07-14,44,2
		724,"Subject 7",3,"0107",2016-07-14 05:43:53,92.2485,69.0195,0.4,0.748,0,2.19,NA,NA,981,167,NA,NA,0,2016-07-14 05:00:00,2016-07-14,44,2
		725,"Subject 7",3,"0107",2016-07-14 06:11:53,89.4005,67.907,0.4,0.759,0,2.19,NA,NA,545,29,NA,NA,0,2016-07-14 06:00:00,2016-07-14,45,2
		726,"Subject 7",3,"0107",2016-07-14 06:39:53,88.7775,67.106,0.4,0.756,0,2.19,NA,NA,793,83,NA,NA,0,2016-07-14 06:00:00,2016-07-14,45,2
		727,"Subject 7",3,"0107",2016-07-14 07:07:53,84.6835,63.0565,0.4,0.745,0,2.19,NA,NA,1131,143,NA,NA,0,2016-07-14 07:00:00,2016-07-14,46,2
		728,"Subject 7",3,"0107",2016-07-14 07:35:53,84.105,63.4125,0.4,0.754,0,2.19,NA,NA,1270,13,NA,NA,0,2016-07-14 07:00:00,2016-07-14,46,2
		729,"Subject 7",3,"0107",2016-07-14 08:03:53,86.1965,65.9935,0.4,0.766,0,2.19,NA,NA,921,96,NA,NA,0,2016-07-14 08:00:00,2016-07-14,47,2
		730,"Subject 7",3,"0107",2016-07-14 08:31:53,83.1705,61.9885,0.4,0.746,0,2.19,NA,NA,709,18,NA,NA,0,2016-07-14 08:00:00,2016-07-14,47,2
		731,"Subject 7",3,"0107",2016-07-14 08:59:53,78.409,58.295,0.4,0.744,0,2.19,NA,NA,519,13,NA,NA,0,2016-07-14 08:00:00,2016-07-14,47,2
		732,"Subject 7",3,"0107",2016-07-14 09:27:53,95.942,73.1135,0.5,0.762,0,2.19,NA,NA,1184,324,NA,NA,0,2016-07-14 09:00:00,2016-07-14,48,2
		733,"Subject 7",3,"0107",2016-07-14 09:55:53,81.4795,61.232,0.4,0.751,0,2.19,NA,NA,1023,21,NA,NA,0,2016-07-14 09:00:00,2016-07-14,48,2
		734,"Subject 7",3,"0107",2016-07-14 10:23:53,91.67,71.4225,0.4,0.779,-0.01,2.18,NA,NA,936,101,NA,NA,0,2016-07-14 10:00:00,2016-07-14,49,2
		735,"Subject 7",3,"0107",2016-07-14 10:51:53,84.2385,63.546,0.4,0.754,0.01,2.19,NA,NA,644,21,NA,NA,0,2016-07-14 10:00:00,2016-07-14,49,2
		736,"Subject 7",3,"0107",2016-07-14 11:19:53,88.555,67.106,0.4,0.758,0,2.19,NA,NA,313,42,NA,NA,0,2016-07-14 11:00:00,2016-07-14,50,2
		737,"Subject 7",3,"0107",2016-07-14 11:47:53,86.864,65.6375,0.4,0.756,0,2.19,NA,NA,453,30,NA,NA,0,2016-07-14 11:00:00,2016-07-14,50,2
		738,"Subject 7",3,"0107",2016-07-14 12:15:53,93.3165,70.9775,0.4,0.761,-0.03,2.16,NA,NA,1392,359,NA,NA,0,2016-07-14 12:00:00,2016-07-14,51,2
		739,"Subject 7",3,"0107",2016-07-14 12:43:53,87.309,65.2815,0.4,0.748,0.03,2.19,NA,NA,441,25,NA,NA,0,2016-07-14 12:00:00,2016-07-14,51,2
		740,"Subject 7",3,"0107",2016-07-14 13:11:53,86.241,65.1925,0.4,0.756,0,2.19,NA,NA,1023,34,NA,NA,0,2016-07-14 13:00:00,2016-07-14,52,2
		741,"Subject 7",3,"0107",2016-07-14 13:39:53,66.839,48.238,0.3,0.722,0.01,2.2,NA,NA,944,255,NA,NA,0,2016-07-14 13:00:00,2016-07-14,52,2
		742,"Subject 7",3,"0107",2016-07-14 14:07:53,93.717,69.4645,0.4,0.741,-0.01,2.19,NA,NA,959,100,NA,NA,0,2016-07-14 14:00:00,2016-07-14,53,2
		743,"Subject 7",3,"0107",2016-07-14 14:35:53,86.8195,65.148,0.4,0.75,0,2.19,NA,NA,1259,58,NA,NA,0,2016-07-14 14:00:00,2016-07-14,53,2
		744,"Subject 7",3,"0107",2016-07-14 15:03:53,93.5835,69.687,0.4,0.745,0,2.19,NA,NA,1103,25,NA,NA,0,2016-07-14 15:00:00,2016-07-14,54,2
		745,"Subject 7",3,"0107",2016-07-14 15:31:53,90.5575,67.551,0.4,0.746,0,2.19,NA,NA,371,34,NA,NA,0,2016-07-14 15:00:00,2016-07-14,54,2
		746,"Subject 7",3,"0107",2016-07-14 15:59:53,92.7825,69.776,0.4,0.752,0,2.19,NA,NA,625,14,NA,NA,0,2016-07-14 15:00:00,2016-07-14,54,2
		747,"Subject 7",3,"0107",2016-07-14 16:27:53,88.911,65.8155,0.4,0.74,0,2.19,NA,NA,1055,221,NA,NA,0,2016-07-14 16:00:00,2016-07-14,55,2
		748,"Subject 7",3,"0107",2016-07-14 16:55:53,89.089,66.928,0.4,0.751,0,2.19,NA,NA,446,26,NA,NA,0,2016-07-14 16:00:00,2016-07-14,55,2
		749,"Subject 7",3,"0107",2016-07-14 17:23:53,90.1125,67.7735,0.4,0.752,0,2.19,NA,NA,368,16,NA,NA,0,2016-07-14 17:00:00,2016-07-14,56,2
		750,"Subject 7",3,"0107",2016-07-14 17:51:53,103.863,78.5425,0.5,0.756,0,2.19,NA,NA,1267,237,NA,NA,0,2016-07-14 17:00:00,2016-07-14,56,2
		751,"Subject 7",3,"0107",2016-07-14 18:19:53,90.4685,66.8835,0.4,0.739,0,2.19,NA,NA,430,49,NA,NA,0,2016-07-14 18:00:00,2016-07-14,57,2
		752,"Subject 7",3,"0107",2016-07-14 18:47:53,122.375,92.827,0.6,0.759,0.03,2.22,NA,NA,2896,1194,NA,NA,0,2016-07-14 18:00:00,2016-07-14,57,2
		753,"Subject 7",3,"0107",2016-07-14 19:15:53,117.6135,88.2435,0.6,0.751,0.03,2.25,NA,NA,2067,331,NA,NA,0,2016-07-14 19:00:00,2016-07-14,58,2
		754,"Subject 7",3,"0107",2016-07-14 19:43:53,97.1435,72.802,0.5,0.749,0,2.25,NA,NA,453,25,NA,NA,0,2016-07-14 19:00:00,2016-07-14,58,2
		755,"Subject 7",3,"0107",2016-07-14 20:11:53,110.449,83.838,0.5,0.759,0,2.25,NA,NA,1514,154,NA,NA,0,2016-07-14 20:00:00,2016-07-14,59,2
		756,"Subject 7",3,"0107",2016-07-14 20:39:53,102.4835,76.54,0.5,0.747,0,2.25,NA,NA,315,44,NA,NA,0,2016-07-14 20:00:00,2016-07-14,59,2
		757,"Subject 7",3,"0107",2016-07-14 21:07:53,96.7875,71.645,0.5,0.741,0,2.25,NA,NA,742,76,NA,NA,0,2016-07-14 21:00:00,2016-07-14,60,2
		758,"Subject 7",3,"0107",2016-07-14 21:35:53,105.287,80.2335,0.5,0.762,0.11,2.36,NA,NA,2155,726,NA,NA,0,2016-07-14 21:00:00,2016-07-14,60,2
		759,"Subject 7",3,"0107",2016-07-14 22:03:53,120.3725,93.0495,0.6,0.773,0.01,2.37,NA,NA,1287,280,NA,NA,0,2016-07-14 22:00:00,2016-07-14,61,2
		760,"Subject 7",3,"0107",2016-07-14 22:31:53,93.361,70.933,0.4,0.759,-0.01,2.36,NA,NA,861,73,NA,NA,0,2016-07-14 22:00:00,2016-07-14,61,2
		761,"Subject 7",3,"0107",2016-07-14 22:59:53,113.92,89.178,0.5,0.783,0.09,2.45,NA,NA,1150,302,NA,NA,0,2016-07-14 22:00:00,2016-07-14,61,2
		762,"Subject 7",3,"0107",2016-07-14 23:27:53,130.5185,100.8815,0.6,0.773,0.04,2.49,NA,NA,2914,1032,NA,NA,0,2016-07-14 23:00:00,2016-07-14,62,2
		763,"Subject 7",3,"0107",2016-07-14 23:55:53,105.0645,80.99,0.5,0.771,0.05,2.54,NA,NA,2511,716,NA,NA,0,2016-07-14 23:00:00,2016-07-14,62,2
		764,"Subject 7",3,"0107",2016-07-15 00:23:53,105.554,79.6105,0.5,0.755,0,2.54,NA,NA,168,42,NA,NA,0,2016-07-15 00:00:00,2016-07-15,63,3
		765,"Subject 7",3,"0107",2016-07-15 00:51:53,96.4315,73.247,0.5,0.76,0.01,2.55,NA,NA,481,29,NA,NA,0,2016-07-15 00:00:00,2016-07-15,63,3
		766,"Subject 7",3,"0107",2016-07-15 01:19:53,96.8765,72.5795,0.5,0.75,0,2.55,NA,NA,907,83,NA,NA,0,2016-07-15 01:00:00,2016-07-15,64,3
		767,"Subject 7",3,"0107",2016-07-15 01:47:53,102.083,76.807,0.5,0.752,0,2.55,NA,NA,960,38,NA,NA,0,2016-07-15 01:00:00,2016-07-15,64,3
		768,"Subject 7",3,"0107",2016-07-15 02:15:53,93.717,69.954,0.4,0.747,0.01,2.56,NA,NA,454,27,NA,NA,0,2016-07-15 02:00:00,2016-07-15,65,3
		769,"Subject 7",3,"0107",2016-07-15 02:43:53,112.5405,85.351,0.5,0.759,0.08,2.64,NA,NA,2499,764,NA,NA,0,2016-07-15 02:00:00,2016-07-15,65,3
		770,"Subject 7",3,"0107",2016-07-15 03:11:53,134.657,103.9075,0.6,0.772,0.1,2.74,NA,NA,2809,1219,NA,NA,0,2016-07-15 03:00:00,2016-07-15,66,3
		771,"Subject 7",3,"0107",2016-07-15 03:39:53,106.889,81.524,0.5,0.762,0.01,2.75,NA,NA,2716,705,NA,NA,0,2016-07-15 03:00:00,2016-07-15,66,3
		772,"Subject 7",3,"0107",2016-07-15 04:07:53,100.7925,75.7835,0.5,0.752,0,2.75,NA,NA,595,49,NA,NA,0,2016-07-15 04:00:00,2016-07-15,67,3
		773,"Subject 7",3,"0107",2016-07-15 04:35:53,97.3215,74.0925,0.5,0.761,0,2.75,NA,NA,764,40,NA,NA,0,2016-07-15 04:00:00,2016-07-15,67,3
		774,"Subject 7",3,"0107",2016-07-15 05:03:53,98.701,74.6265,0.5,0.756,0.01,2.76,NA,NA,277,41,NA,NA,0,2016-07-15 05:00:00,2016-07-15,68,3
		775,"Subject 7",3,"0107",2016-07-15 05:31:53,97.633,73.336,0.5,0.751,0,2.76,NA,NA,253,39,NA,NA,0,2016-07-15 05:00:00,2016-07-15,68,3
		776,"Subject 7",3,"0107",2016-07-15 05:59:53,123.8435,95.5415,0.6,0.771,0.07,2.83,NA,NA,2599,725,NA,NA,0,2016-07-15 05:00:00,2016-07-15,68,3
		777,"Subject 7",3,"0107",2016-07-15 06:27:53,120.417,92.649,0.6,0.77,0.02,2.85,NA,NA,3731,1192,NA,NA,0,2016-07-15 06:00:00,2016-07-15,69,3
		778,"Subject 7",3,"0107",2016-07-15 06:55:53,95.7195,72.7575,0.5,0.76,0,2.85,NA,NA,1122,102,NA,NA,0,2016-07-15 06:00:00,2016-07-15,69,3
		779,"Subject 7",3,"0107",2016-07-15 07:23:53,90.068,67.5065,0.4,0.75,0.01,2.86,NA,NA,743,41,NA,NA,0,2016-07-15 07:00:00,2016-07-15,70,3
		780,"Subject 7",3,"0107",2016-07-15 07:51:53,89.267,67.373,0.4,0.755,0,2.86,NA,NA,756,19,NA,NA,0,2016-07-15 07:00:00,2016-07-15,70,3
		781,"Subject 7",3,"0107",2016-07-15 08:19:53,91.7145,69.598,0.4,0.759,0.01,2.87,NA,NA,30,1,NA,NA,0,2016-07-15 08:00:00,2016-07-15,71,3
		782,"Subject 7",3,"0107",2016-07-15 08:47:53,92.738,70.6215,0.4,0.761,0,2.87,NA,NA,1414,70,NA,NA,0,2016-07-15 08:00:00,2016-07-15,71,3
		783,"Subject 7",3,"0107",2016-07-15 09:15:53,101.5045,78.2755,0.5,0.771,0.01,2.88,NA,NA,1202,172,NA,NA,0,2016-07-15 09:00:00,2016-07-15,72,3
		784,"Subject 7",3,"0107",2016-07-15 09:43:53,102.6615,78.7205,0.5,0.767,0.05,2.93,NA,NA,1723,335,NA,NA,0,2016-07-15 09:00:00,2016-07-15,72,3
		785,"Subject 7",3,"0107",2016-07-15 10:11:53,88.644,68.0405,0.4,0.768,-0.01,2.92,NA,NA,1289,4,NA,NA,0,2016-07-15 10:00:00,2016-07-15,73,3
		786,"Subject 7",3,"0107",2016-07-15 10:39:53,95.1855,72.357,0.5,0.76,0.01,2.93,NA,NA,527,73,NA,NA,0,2016-07-15 10:00:00,2016-07-15,73,3
		787,"Subject 7",3,"0107",2016-07-15 11:07:53,116.8125,88.822,0.6,0.76,0,2.93,NA,NA,1665,477,NA,NA,0,2016-07-15 11:00:00,2016-07-15,74,3
		788,"Subject 7",3,"0107",2016-07-15 11:35:53,91.581,69.509,0.4,0.759,0,2.93,NA,NA,754,148,NA,NA,0,2016-07-15 11:00:00,2016-07-15,74,3
		789,"Subject 7",3,"0107",2016-07-15 12:03:53,96.6985,74.7155,0.5,0.772,0,2.93,NA,NA,633,63,NA,NA,0,2016-07-15 12:00:00,2016-07-15,75,3
		790,"Subject 7",3,"0107",2016-07-15 12:31:53,60.609,43.966,0.3,0.725,0.05,2.98,NA,NA,1860,328,NA,NA,0,2016-07-15 12:00:00,2016-07-15,75,3
		791,"Subject 7",3,"0107",2016-07-15 12:59:53,95.8085,71.3335,0.5,0.744,0.01,2.99,NA,NA,3160,27,NA,NA,0,2016-07-15 12:00:00,2016-07-15,75,3
		792,"Subject 7",3,"0107",2016-07-15 13:27:53,95.7195,70.7105,0.5,0.738,-0.01,2.98,NA,NA,2634,78,NA,NA,0,2016-07-15 13:00:00,2016-07-15,76,3
		793,"Subject 7",3,"0107",2016-07-15 13:55:53,92.2485,69.1975,0.4,0.75,0.01,2.99,NA,NA,159,17,NA,NA,0,2016-07-15 13:00:00,2016-07-15,76,3
		794,"Subject 7",3,"0107",2016-07-15 14:23:53,89.9345,68.263,0.4,0.759,-0.01,2.98,NA,NA,260,31,NA,NA,0,2016-07-15 14:00:00,2016-07-15,77,3
		795,"Subject 7",3,"0107",2016-07-15 14:51:53,92.026,68.8415,0.4,0.748,0.01,2.99,NA,NA,55,18,NA,NA,0,2016-07-15 14:00:00,2016-07-15,77,3
		796,"Subject 7",3,"0107",2016-07-15 15:19:53,90.958,69.9985,0.4,0.77,-0.01,2.98,NA,NA,872,73,NA,NA,0,2016-07-15 15:00:00,2016-07-15,78,3
		797,"Subject 7",3,"0107",2016-07-15 15:47:53,92.6045,69.4645,0.4,0.75,0.01,2.99,NA,NA,293,74,NA,NA,0,2016-07-15 15:00:00,2016-07-15,78,3
		798,"Subject 7",3,"0107",2016-07-15 16:15:53,88.644,67.0615,0.4,0.756,0,2.99,NA,NA,101,22,NA,NA,0,2016-07-15 16:00:00,2016-07-15,79,3
		799,"Subject 7",3,"0107",2016-07-15 16:43:53,102.7505,77.964,0.5,0.759,0,2.99,NA,NA,1191,139,NA,NA,0,2016-07-15 16:00:00,2016-07-15,79,3
		800,"Subject 7",3,"0107",2016-07-15 17:11:53,99.8135,78.587,0.5,0.787,0.11,3.1,NA,NA,824,104,NA,NA,0,2016-07-15 17:00:00,2016-07-15,80,3
		801,"Subject 7",3,"0107",2016-07-15 17:39:53,101.015,76.8515,0.5,0.761,0,3.1,NA,NA,1053,59,NA,NA,0,2016-07-15 17:00:00,2016-07-15,80,3
		802,"Subject 7",3,"0107",2016-07-15 18:07:53,109.6035,86.9085,0.5,0.793,0.04,3.14,NA,NA,704,124,NA,NA,0,2016-07-15 18:00:00,2016-07-15,81,3
		803,"Subject 7",3,"0107",2016-07-15 18:35:53,115.1215,89.178,0.5,0.775,0.08,3.22,NA,NA,2625,895,NA,NA,0,2016-07-15 18:00:00,2016-07-15,81,3
		804,"Subject 7",3,"0107",2016-07-15 19:03:53,98.6565,74.6265,0.5,0.756,-0.01,3.21,NA,NA,1207,122,NA,NA,0,2016-07-15 19:00:00,2016-07-15,82,3
		805,"Subject 7",3,"0107",2016-07-15 19:31:53,112.318,87.2645,0.5,0.777,0.04,3.25,NA,NA,1047,168,NA,NA,0,2016-07-15 19:00:00,2016-07-15,82,3
		806,"Subject 7",3,"0107",2016-07-15 19:59:53,113.0745,88.822,0.5,0.786,0.1,3.35,NA,NA,994,176,NA,NA,0,2016-07-15 19:00:00,2016-07-15,82,3
		807,"Subject 7",3,"0107",2016-07-15 20:27:53,117.747,91.7145,0.6,0.779,0.04,3.39,NA,NA,3522,1405,NA,NA,0,2016-07-15 20:00:00,2016-07-15,83,3
		808,"Subject 7",3,"0107",2016-07-15 20:55:53,100.1695,75.472,0.5,0.753,0,3.39,NA,NA,518,68,NA,NA,0,2016-07-15 20:00:00,2016-07-15,83,3
		809,"Subject 7",3,"0107",2016-07-15 21:23:53,98.523,73.2025,0.5,0.743,0,3.39,NA,NA,248,49,NA,NA,0,2016-07-15 21:00:00,2016-07-15,84,3
		810,"Subject 7",3,"0107",2016-07-15 21:51:53,118.637,94.607,0.6,0.798,0.16,3.55,NA,NA,3812,1603,NA,NA,0,2016-07-15 21:00:00,2016-07-15,84,3
		811,"Subject 7",3,"0107",2016-07-15 22:19:53,100.2585,75.828,0.5,0.756,-0.01,3.54,NA,NA,1398,136,NA,NA,0,2016-07-15 22:00:00,2016-07-15,85,3
		812,"Subject 7",3,"0107",2016-07-15 22:47:53,125.579,96.5205,0.6,0.769,0.05,3.59,NA,NA,1917,770,NA,NA,0,2016-07-15 22:00:00,2016-07-15,85,3
		813,"Subject 7",3,"0107",2016-07-15 23:15:53,103.7295,78.676,0.5,0.758,0.05,3.64,NA,NA,2596,551,NA,NA,0,2016-07-15 23:00:00,2016-07-15,86,3
		814,"Subject 7",3,"0107",2016-07-15 23:43:53,96.209,72.9355,0.5,0.758,0,3.64,NA,NA,523,13,NA,NA,0,2016-07-15 23:00:00,2016-07-15,86,3
		815,"Subject 7",3,"0107",2016-07-16 00:11:53,89.2225,66.0825,0.4,0.74,0.01,3.65,NA,NA,666,45,NA,NA,0,2016-07-16 00:00:00,2016-07-16,87,4
		816,"Subject 7",3,"0107",2016-07-16 00:39:53,95.8085,74.9825,0.5,0.782,0.06,3.71,NA,NA,422,77,NA,NA,0,2016-07-16 00:00:00,2016-07-16,87,4
		817,"Subject 7",3,"0107",2016-07-16 01:07:53,91.6255,70.221,0.4,0.767,0,3.71,NA,NA,176,41,NA,NA,0,2016-07-16 01:00:00,2016-07-16,88,4
		818,"Subject 7",3,"0107",2016-07-16 01:35:53,105.109,84.105,0.5,0.8,0.03,3.74,NA,NA,1009,140,NA,NA,0,2016-07-16 01:00:00,2016-07-16,88,4
		819,"Subject 7",3,"0107",2016-07-16 02:03:53,114.81,88.8665,0.5,0.774,0.08,3.82,NA,NA,2775,972,NA,NA,0,2016-07-16 02:00:00,2016-07-16,89,4
		820,"Subject 7",3,"0107",2016-07-16 02:31:53,87.7985,66.7055,0.4,0.76,0,3.82,NA,NA,236,21,NA,NA,0,2016-07-16 02:00:00,2016-07-16,89,4
		821,"Subject 7",3,"0107",2016-07-16 02:59:53,88.1545,66.127,0.4,0.75,0.01,3.83,NA,NA,231,26,NA,NA,0,2016-07-16 02:00:00,2016-07-16,89,4
		822,"Subject 7",3,"0107",2016-07-16 03:27:53,88.822,66.216,0.4,0.746,0,3.83,NA,NA,697,110,NA,NA,0,2016-07-16 03:00:00,2016-07-16,90,4
		823,"Subject 7",3,"0107",2016-07-16 03:55:53,112.051,89.623,0.5,0.8,0.09,3.92,NA,NA,2400,841,NA,NA,0,2016-07-16 03:00:00,2016-07-16,90,4
		824,"Subject 7",3,"0107",2016-07-16 04:23:53,88.2435,67.2395,0.4,0.762,0,3.92,NA,NA,1758,133,NA,NA,0,2016-07-16 04:00:00,2016-07-16,91,4
		825,"Subject 7",3,"0107",2016-07-16 04:51:53,96.298,73.959,0.5,0.768,0.05,3.97,NA,NA,1315,57,NA,NA,0,2016-07-16 04:00:00,2016-07-16,91,4
		826,"Subject 7",3,"0107",2016-07-16 05:19:53,90.0235,69.1975,0.4,0.769,0,3.97,NA,NA,888,84,NA,NA,0,2016-07-16 05:00:00,2016-07-16,92,4
		827,"Subject 7",3,"0107",2016-07-16 05:47:53,89.7565,69.776,0.4,0.778,0.05,4.02,NA,NA,1961,536,NA,NA,0,2016-07-16 05:00:00,2016-07-16,92,4
		828,"Subject 7",3,"0107",2016-07-16 06:15:53,85.0395,64.0355,0.4,0.753,0,4.02,NA,NA,626,58,NA,NA,0,2016-07-16 06:00:00,2016-07-16,93,4
		829,"Subject 7",3,"0107",2016-07-16 06:43:53,85.262,65.5485,0.4,0.769,0,4.02,NA,NA,664,34,NA,NA,0,2016-07-16 06:00:00,2016-07-16,93,4
		830,"Subject 7",3,"0107",2016-07-16 07:11:53,81.3015,62.834,0.4,0.773,0,4.02,NA,NA,536,73,NA,NA,0,2016-07-16 07:00:00,2016-07-16,94,4
		831,"Subject 7",3,"0107",2016-07-16 07:39:53,84.728,64.8365,0.4,0.765,0,4.02,NA,NA,293,40,NA,NA,0,2016-07-16 07:00:00,2016-07-16,94,4
		832,"Subject 7",3,"0107",2016-07-16 08:07:53,99.6355,80.011,0.5,0.803,0.08,4.1,NA,NA,2012,336,NA,NA,0,2016-07-16 08:00:00,2016-07-16,95,4
		833,"Subject 7",3,"0107",2016-07-16 08:35:53,82.859,64.9255,0.4,0.784,0,4.1,NA,NA,171,24,NA,NA,0,2016-07-16 08:00:00,2016-07-16,95,4
		834,"Subject 7",3,"0107",2016-07-16 09:03:53,86.33,66.928,0.4,0.775,0,4.1,NA,NA,810,174,NA,NA,0,2016-07-16 09:00:00,2016-07-16,96,4
		835,"Subject 7",3,"0107",2016-07-16 09:31:53,91.581,69.865,0.4,0.763,0.01,4.11,NA,NA,2335,86,NA,NA,0,2016-07-16 09:00:00,2016-07-16,96,4
		836,"Subject 7",3,"0107",2016-07-16 09:59:53,87.131,67.284,0.4,0.772,-0.01,4.1,NA,NA,1470,46,NA,NA,0,2016-07-16 09:00:00,2016-07-16,96,4
		837,"Subject 7",3,"0107",2016-07-16 10:27:53,105.198,82.1025,0.5,0.781,0.01,4.11,NA,NA,1439,290,NA,NA,0,2016-07-16 10:00:00,2016-07-16,97,4
		838,"Subject 7",3,"0107",2016-07-16 10:55:53,82.592,63.5015,0.4,0.769,0,4.11,NA,NA,103,28,NA,NA,0,2016-07-16 10:00:00,2016-07-16,97,4
		839,"Subject 7",3,"0107",2016-07-16 11:23:53,78.3645,61.232,0.4,0.781,0,4.11,NA,NA,338,41,NA,NA,0,2016-07-16 11:00:00,2016-07-16,98,4
		840,"Subject 7",3,"0107",2016-07-16 11:51:53,82.325,63.991,0.4,0.777,0,4.11,NA,NA,323,31,NA,NA,0,2016-07-16 11:00:00,2016-07-16,98,4
		841,"Subject 7",3,"0107",2016-07-16 12:19:53,66.7945,48.238,0.3,0.722,0,4.11,NA,NA,1270,415,NA,NA,0,2016-07-16 12:00:00,2016-07-16,99,4
		842,"Subject 7",3,"0107",2016-07-16 12:47:53,91.937,68.53,0.4,0.746,0,4.11,NA,NA,225,50,NA,NA,0,2016-07-16 12:00:00,2016-07-16,99,4
		843,"Subject 7",3,"0107",2016-07-16 13:15:53,83.6155,61.766,0.4,0.739,0,4.11,NA,NA,1139,31,NA,NA,0,2016-07-16 13:00:00,2016-07-16,100,4
		844,"Subject 7",3,"0107",2016-07-16 13:43:53,84.995,64.436,0.4,0.758,0,4.11,NA,NA,528,103,NA,NA,0,2016-07-16 13:00:00,2016-07-16,100,4
		845,"Subject 7",3,"0107",2016-07-16 14:11:53,84.6835,65.2815,0.4,0.771,0,4.11,NA,NA,114,11,NA,NA,0,2016-07-16 14:00:00,2016-07-16,101,4
		846,"Subject 7",3,"0107",2016-07-16 14:39:53,88.466,69.954,0.4,0.791,0.01,4.12,NA,NA,1694,156,NA,NA,0,2016-07-16 14:00:00,2016-07-16,101,4
		847,"Subject 7",3,"0107",2016-07-16 15:07:53,95.9865,76.8515,0.5,0.801,-0.01,4.11,NA,NA,2296,225,NA,NA,0,2016-07-16 15:00:00,2016-07-16,102,4
		848,"Subject 7",3,"0107",2016-07-16 15:35:53,85.1285,64.614,0.4,0.759,0.01,4.12,NA,NA,1026,155,NA,NA,0,2016-07-16 15:00:00,2016-07-16,102,4
		849,"Subject 7",3,"0107",2016-07-16 16:03:53,109.114,83.9715,0.5,0.77,0.01,4.13,NA,NA,1772,248,NA,NA,0,2016-07-16 16:00:00,2016-07-16,103,4
		850,"Subject 7",3,"0107",2016-07-16 16:31:53,85.4845,64.9255,0.4,0.759,0,4.13,NA,NA,458,79,NA,NA,0,2016-07-16 16:00:00,2016-07-16,103,4
		851,"Subject 7",3,"0107",2016-07-16 16:59:53,89.712,69.0195,0.4,0.77,0,4.13,NA,NA,1381,81,NA,NA,0,2016-07-16 16:00:00,2016-07-16,103,4
		852,"Subject 7",3,"0107",2016-07-16 17:27:53,91.8925,73.158,0.4,0.796,0.06,4.19,NA,NA,935,112,NA,NA,0,2016-07-16 17:00:00,2016-07-16,104,4
		853,"Subject 7",3,"0107",2016-07-16 17:55:53,105.3315,82.9925,0.5,0.788,0.04,4.23,NA,NA,1321,152,NA,NA,0,2016-07-16 17:00:00,2016-07-16,104,4
		854,"Subject 7",3,"0107",2016-07-16 18:23:53,99.5465,77.519,0.5,0.779,0.07,4.3,NA,NA,1675,535,NA,NA,0,2016-07-16 18:00:00,2016-07-16,105,4
		855,"Subject 7",3,"0107",2016-07-16 18:51:53,109.203,83.393,0.5,0.764,0.07,4.37,NA,NA,3762,1465,NA,NA,0,2016-07-16 18:00:00,2016-07-16,105,4
		856,"Subject 7",3,"0107",2016-07-16 19:19:53,116.145,92.8715,0.6,0.8,0.06,4.43,NA,NA,3189,1086,NA,NA,0,2016-07-16 19:00:00,2016-07-16,106,4
		857,"Subject 7",3,"0107",2016-07-16 19:47:53,94.518,72.268,0.4,0.764,0,4.43,NA,NA,1589,159,NA,NA,0,2016-07-16 19:00:00,2016-07-16,106,4
		858,"Subject 7",3,"0107",2016-07-16 20:15:53,120.9065,98.4785,0.6,0.814,0.12,4.55,NA,NA,3496,1190,NA,NA,0,2016-07-16 20:00:00,2016-07-16,107,4
		859,"Subject 7",3,"0107",2016-07-16 20:43:53,94.429,72.179,0.4,0.764,0,4.55,NA,NA,964,135,NA,NA,0,2016-07-16 20:00:00,2016-07-16,107,4
		860,"Subject 7",3,"0107",2016-07-16 21:11:53,109.0695,85.885,0.5,0.787,0.11,4.66,NA,NA,2314,619,NA,NA,0,2016-07-16 21:00:00,2016-07-16,108,4
		861,"Subject 7",3,"0107",2016-07-16 21:39:53,93.094,70.221,0.4,0.754,0.01,4.67,NA,NA,660,23,NA,NA,0,2016-07-16 21:00:00,2016-07-16,108,4
		862,"Subject 7",3,"0107",2016-07-16 22:07:53,108.758,83.393,0.5,0.767,0.09,4.76,NA,NA,1005,321,NA,NA,0,2016-07-16 22:00:00,2016-07-16,109,4
		863,"Subject 7",3,"0107",2016-07-16 22:35:53,101.193,77.8305,0.5,0.769,0,4.76,NA,NA,2142,393,NA,NA,0,2016-07-16 22:00:00,2016-07-16,109,4
		864,"Subject 7",3,"0107",2016-07-16 23:03:53,90.2905,67.3285,0.4,0.746,0,4.76,NA,NA,323,46,NA,NA,0,2016-07-16 23:00:00,2016-07-16,110,4
		865,"Subject 7",3,"0107",2016-07-16 23:31:53,115.7445,92.56,0.6,0.8,0.17,4.93,NA,NA,3509,1428,NA,NA,0,2016-07-16 23:00:00,2016-07-16,110,4
		866,"Subject 7",3,"0107",2016-07-16 23:59:53,98.256,74.6265,0.5,0.76,0,4.93,NA,NA,700,68,NA,NA,0,2016-07-16 23:00:00,2016-07-16,110,4
		867,"Subject 7",3,"0107",2016-07-17 00:27:53,104.6195,84.817,0.5,0.81,0.08,5.01,NA,NA,1353,170,NA,NA,0,2016-07-17 00:00:00,2016-07-17,111,5
		868,"Subject 7",3,"0107",2016-07-17 00:55:53,102.35,79.1655,0.5,0.774,0,5.01,NA,NA,465,31,NA,NA,0,2016-07-17 00:00:00,2016-07-17,111,5
		869,"Subject 7",3,"0107",2016-07-17 01:23:53,88.555,67.5955,0.4,0.763,0,5.01,NA,NA,1319,153,NA,NA,0,2016-07-17 01:00:00,2016-07-17,112,5
		870,"Subject 7",3,"0107",2016-07-17 01:51:53,122.909,96.6985,0.6,0.787,0.1,5.11,NA,NA,2052,717,NA,NA,0,2016-07-17 01:00:00,2016-07-17,112,5
		871,"Subject 7",3,"0107",2016-07-17 02:19:53,110.449,87.22,0.5,0.79,0.07,5.18,NA,NA,2877,992,NA,NA,0,2016-07-17 02:00:00,2016-07-17,113,5
		872,"Subject 7",3,"0107",2016-07-17 02:47:53,99.2795,75.9615,0.5,0.765,-0.01,5.17,NA,NA,145,23,NA,NA,0,2016-07-17 02:00:00,2016-07-17,113,5
		873,"Subject 7",3,"0107",2016-07-17 03:15:53,93.3165,71.734,0.4,0.769,0.06,5.23,NA,NA,1218,146,NA,NA,0,2016-07-17 03:00:00,2016-07-17,114,5
		874,"Subject 7",3,"0107",2016-07-17 03:43:53,97.2325,76.451,0.5,0.786,0.06,5.29,NA,NA,1577,137,NA,NA,0,2016-07-17 03:00:00,2016-07-17,114,5
		875,"Subject 7",3,"0107",2016-07-17 04:11:53,91.6255,72.268,0.4,0.789,0,5.29,NA,NA,510,59,NA,NA,0,2016-07-17 04:00:00,2016-07-17,115,5
		876,"Subject 7",3,"0107",2016-07-17 04:39:53,112.2735,92.026,0.5,0.82,0.14,5.43,NA,NA,3565,1333,NA,NA,0,2016-07-17 04:00:00,2016-07-17,115,5
		877,"Subject 7",3,"0107",2016-07-17 05:07:53,89.445,70.221,0.4,0.785,0,5.43,NA,NA,505,100,NA,NA,0,2016-07-17 05:00:00,2016-07-17,116,5
		878,"Subject 7",3,"0107",2016-07-17 05:35:53,87.309,70.0875,0.4,0.803,0.07,5.5,NA,NA,1254,217,NA,NA,0,2016-07-17 05:00:00,2016-07-17,116,5
		879,"Subject 7",3,"0107",2016-07-17 06:03:53,96.298,75.205,0.5,0.781,0.03,5.53,NA,NA,891,66,NA,NA,0,2016-07-17 06:00:00,2016-07-17,117,5
		880,"Subject 7",3,"0107",2016-07-17 06:31:53,84.194,66.839,0.4,0.794,0,5.53,NA,NA,326,39,NA,NA,0,2016-07-17 06:00:00,2016-07-17,117,5
		881,"Subject 7",3,"0107",2016-07-17 06:59:53,84.461,65.9045,0.4,0.78,0.01,5.54,NA,NA,167,44,NA,NA,0,2016-07-17 06:00:00,2016-07-17,117,5
		882,"Subject 7",3,"0107",2016-07-17 07:27:53,108.758,91.5365,0.5,0.842,0.12,5.66,NA,NA,2980,868,NA,NA,0,2016-07-17 07:00:00,2016-07-17,118,5
		883,"Subject 7",3,"0107",2016-07-17 07:55:53,90.3795,71.378,0.4,0.79,0,5.66,NA,NA,1213,113,NA,NA,0,2016-07-17 07:00:00,2016-07-17,118,5
		884,"Subject 7",3,"0107",2016-07-17 08:23:53,84.283,66.4385,0.4,0.788,0,5.66,NA,NA,184,22,NA,NA,0,2016-07-17 08:00:00,2016-07-17,119,5
		885,"Subject 7",3,"0107",2016-07-17 08:51:53,83.66,65.504,0.4,0.783,0,5.66,NA,NA,289,36,NA,NA,0,2016-07-17 08:00:00,2016-07-17,119,5
		886,"Subject 7",3,"0107",2016-07-17 09:19:53,83.838,65.415,0.4,0.78,0.01,5.67,NA,NA,206,30,NA,NA,0,2016-07-17 09:00:00,2016-07-17,120,5
		887,"Subject 7",3,"0107",2016-07-17 09:47:53,84.3275,67.818,0.4,0.804,0.05,5.72,NA,NA,968,115,NA,NA,0,2016-07-17 09:00:00,2016-07-17,120,5
		888,"Subject 7",3,"0107",2016-07-17 10:15:53,79.121,63.2345,0.4,0.799,0.01,5.73,NA,NA,671,18,NA,NA,0,2016-07-17 10:00:00,2016-07-17,121,5
		889,"Subject 7",3,"0107",2016-07-17 10:43:53,94.3845,75.6055,0.5,0.801,-0.01,5.72,NA,NA,1400,79,NA,NA,0,2016-07-17 10:00:00,2016-07-17,121,5
		890,"Subject 7",3,"0107",2016-07-17 11:11:53,94.1175,75.5165,0.5,0.802,0.07,5.79,NA,NA,1269,80,NA,NA,0,2016-07-17 11:00:00,2016-07-17,122,5
		891,"Subject 7",3,"0107",2016-07-17 11:39:53,35.422,27.5455,0.2,0.778,0.01,5.8,NA,NA,794,172,NA,NA,0,2016-07-17 11:00:00,2016-07-17,122,5
		892,"Subject 7",3,"0107",2016-07-17 12:07:53,89.979,66.928,0.4,0.744,-0.01,5.79,NA,NA,546,109,NA,NA,0,2016-07-17 12:00:00,2016-07-17,123,5
		893,"Subject 7",3,"0107",2016-07-17 12:35:53,87.7985,65.9045,0.4,0.751,0,5.79,NA,NA,179,35,NA,NA,0,2016-07-17 12:00:00,2016-07-17,123,5
		894,"Subject 7",3,"0107",2016-07-17 13:03:53,86.597,65.415,0.4,0.756,0,5.79,NA,NA,302,30,NA,NA,0,2016-07-17 13:00:00,2016-07-17,124,5
		895,"Subject 7",3,"0107",2016-07-17 13:31:53,95.942,76.273,0.5,0.795,0,5.79,NA,NA,2115,248,NA,NA,0,2016-07-17 13:00:00,2016-07-17,124,5
		896,"Subject 7",3,"0107",2016-07-17 13:59:53,85.529,65.237,0.4,0.762,0,5.79,NA,NA,306,33,NA,NA,0,2016-07-17 13:00:00,2016-07-17,124,5
		897,"Subject 7",3,"0107",2016-07-17 14:27:53,87.7985,66.6165,0.4,0.759,0,5.79,NA,NA,1831,43,NA,NA,0,2016-07-17 14:00:00,2016-07-17,125,5
		898,"Subject 7",3,"0107",2016-07-17 14:55:53,93.094,70.043,0.4,0.752,0,5.79,NA,NA,1380,297,NA,NA,0,2016-07-17 14:00:00,2016-07-17,125,5
		899,"Subject 7",3,"0107",2016-07-17 15:23:53,84.105,64.0355,0.4,0.761,0,5.79,NA,NA,83,17,NA,NA,0,2016-07-17 15:00:00,2016-07-17,126,5
		900,"Subject 7",3,"0107",2016-07-17 15:51:53,86.686,65.86,0.4,0.76,0,5.79,NA,NA,534,77,NA,NA,0,2016-07-17 15:00:00,2016-07-17,126,5
		901,"Subject 7",3,"0107",2016-07-17 16:19:53,85.974,68.1295,0.4,0.792,0.06,5.85,NA,NA,965,116,NA,NA,0,2016-07-17 16:00:00,2016-07-17,127,5
		902,"Subject 7",3,"0107",2016-07-17 16:47:53,79.477,61.944,0.4,0.779,0.01,5.86,NA,NA,674,116,NA,NA,0,2016-07-17 16:00:00,2016-07-17,127,5
		903,"Subject 7",3,"0107",2016-07-17 17:15:53,105.8655,86.2855,0.5,0.815,0.12,5.98,NA,NA,1818,633,NA,NA,0,2016-07-17 17:00:00,2016-07-17,128,5
		904,"Subject 7",3,"0107",2016-07-17 17:43:53,91.937,75.9615,0.4,0.826,0.13,6.11,NA,NA,1476,310,NA,NA,0,2016-07-17 17:00:00,2016-07-17,128,5
		905,"Subject 7",3,"0107",2016-07-17 18:11:53,105.5985,88.7775,0.5,0.841,0,6.11,NA,NA,1390,356,NA,NA,0,2016-07-17 18:00:00,2016-07-17,129,5
		906,"Subject 7",3,"0107",2016-07-17 18:39:53,124.2885,104.5305,0.6,0.841,0.25,6.36,NA,NA,5048,2295,NA,NA,0,2016-07-17 18:00:00,2016-07-17,129,5
		907,"Subject 7",3,"0107",2016-07-17 19:07:53,95.2745,78.765,0.5,0.827,0.06,6.42,NA,NA,1161,216,NA,NA,0,2016-07-17 19:00:00,2016-07-17,130,5
		908,"Subject 7",3,"0107",2016-07-17 19:35:53,126.914,105.8655,0.6,0.834,0.16,6.58,NA,NA,3818,1542,NA,NA,0,2016-07-17 19:00:00,2016-07-17,130,5
		909,"Subject 7",3,"0107",2016-07-17 20:03:53,111.873,93.272,0.5,0.834,0.12,6.7,NA,NA,2980,990,NA,NA,0,2016-07-17 20:00:00,2016-07-17,131,5
		910,"Subject 7",3,"0107",2016-07-17 20:31:53,89.801,72.001,0.4,0.801,0,6.7,NA,NA,687,46,NA,NA,0,2016-07-17 20:00:00,2016-07-17,131,5
		911,"Subject 7",3,"0107",2016-07-17 20:59:53,100.57,81.5685,0.5,0.811,0.01,6.71,NA,NA,669,114,NA,NA,0,2016-07-17 20:00:00,2016-07-17,131,5
		912,"Subject 7",3,"0107",2016-07-17 21:27:53,110.805,93.361,0.5,0.843,0.09,6.8,NA,NA,2863,876,NA,NA,0,2016-07-17 21:00:00,2016-07-17,132,5
		913,"Subject 7",3,"0107",2016-07-17 21:55:53,93.1385,71.2445,0.4,0.765,0,6.8,NA,NA,1304,103,NA,NA,0,2016-07-17 21:00:00,2016-07-17,132,5
		914,"Subject 7",3,"0107",2016-07-17 22:23:53,88.0655,69.9985,0.4,0.795,0,6.8,NA,NA,1140,139,NA,NA,0,2016-07-17 22:00:00,2016-07-17,133,5
		915,"Subject 7",3,"0107",2016-07-17 22:51:53,107.8235,84.906,0.5,0.787,0.14,6.94,NA,NA,1101,408,NA,NA,0,2016-07-17 22:00:00,2016-07-17,133,5
		916,"Subject 7",3,"0107",2016-07-17 23:19:53,106.266,91.3585,0.5,0.86,0.07,7.01,NA,NA,4140,1806,NA,NA,0,2016-07-17 23:00:00,2016-07-17,134,5
		917,"Subject 7",3,"0107",2016-07-17 23:47:53,98.256,78.32,0.5,0.797,0.12,7.13,NA,NA,467,76,NA,NA,0,2016-07-17 23:00:00,2016-07-17,134,5
		918,"Subject 7",3,"0107",2016-07-18 00:15:53,82.1915,65.949,0.4,0.802,0,7.13,NA,NA,511,53,NA,NA,0,2016-07-18 00:00:00,2016-07-18,135,6
		919,"Subject 7",3,"0107",2016-07-18 00:43:53,106.355,83.5265,0.5,0.785,0.09,7.22,NA,NA,736,107,NA,NA,0,2016-07-18 00:00:00,2016-07-18,135,6
		920,"Subject 7",3,"0107",2016-07-18 01:11:53,92.471,71.4225,0.4,0.773,0.01,7.23,NA,NA,1644,372,NA,NA,0,2016-07-18 01:00:00,2016-07-18,136,6
		921,"Subject 7",3,"0107",2016-07-18 01:39:53,100.9705,84.639,0.5,0.838,0.06,7.29,NA,NA,1492,331,NA,NA,0,2016-07-18 01:00:00,2016-07-18,136,6
		922,"Subject 7",3,"0107",2016-07-18 02:07:53,92.293,72.3125,0.4,0.783,0,7.29,NA,NA,417,36,NA,NA,0,2016-07-18 02:00:00,2016-07-18,137,6
		923,"Subject 7",3,"0107",2016-07-18 02:35:53,83.304,64.8365,0.4,0.778,0,7.29,NA,NA,128,35,NA,NA,0,2016-07-18 02:00:00,2016-07-18,137,6
		924,"Subject 7",3,"0107",2016-07-18 03:03:53,86.419,70.755,0.4,0.819,0.08,7.37,NA,NA,1127,190,NA,NA,0,2016-07-18 03:00:00,2016-07-18,138,6
		925,"Subject 7",3,"0107",2016-07-18 03:31:53,95.586,75.027,0.5,0.785,0,7.37,NA,NA,700,74,NA,NA,0,2016-07-18 03:00:00,2016-07-18,138,6
		926,"Subject 7",3,"0107",2016-07-18 03:59:53,87.131,66.5275,0.4,0.764,0,7.37,NA,NA,2220,164,NA,NA,0,2016-07-18 03:00:00,2016-07-18,138,6
		927,"Subject 7",3,"0107",2016-07-18 04:27:53,113.297,88.9555,0.5,0.785,0.07,7.44,NA,NA,3397,812,NA,NA,0,2016-07-18 04:00:00,2016-07-18,139,6
		928,"Subject 7",3,"0107",2016-07-18 04:55:53,108.313,91.225,0.5,0.842,0.08,7.52,NA,NA,3603,1251,NA,NA,0,2016-07-18 04:00:00,2016-07-18,139,6
		929,"Subject 7",3,"0107",2016-07-18 05:23:53,84.5055,65.5485,0.4,0.776,0,7.52,NA,NA,970,148,NA,NA,0,2016-07-18 05:00:00,2016-07-18,140,6
		930,"Subject 7",3,"0107",2016-07-18 05:51:53,87.6205,66.75,0.4,0.762,0.01,7.53,NA,NA,596,53,NA,NA,0,2016-07-18 05:00:00,2016-07-18,140,6
		931,"Subject 7",3,"0107",2016-07-18 06:19:53,113.03,93.45,0.5,0.827,0.12,7.65,NA,NA,2531,889,NA,NA,0,2016-07-18 06:00:00,2016-07-18,141,6
		932,"Subject 7",3,"0107",2016-07-18 06:47:53,85.3065,68.2185,0.4,0.8,0,7.65,NA,NA,1500,28,NA,NA,0,2016-07-18 06:00:00,2016-07-18,141,6
		933,"Subject 7",3,"0107",2016-07-18 07:15:53,91.5365,70.221,0.4,0.767,-0.01,7.64,NA,NA,432,52,NA,NA,0,2016-07-18 07:00:00,2016-07-18,142,6
		934,"Subject 7",3,"0107",2016-07-18 07:43:53,81.702,63.813,0.4,0.781,0.01,7.65,NA,NA,1044,97,NA,NA,0,2016-07-18 07:00:00,2016-07-18,142,6
		935,"Subject 7",3,"0107",2016-07-18 08:11:53,81.7465,63.635,0.4,0.778,0,7.65,NA,NA,312,46,NA,NA,0,2016-07-18 08:00:00,2016-07-18,143,6
		936,"Subject 7",3,"0107",2016-07-18 08:39:53,101.7715,85.529,0.5,0.841,0.07,7.72,NA,NA,850,146,NA,NA,0,2016-07-18 08:00:00,2016-07-18,143,6
		937,"Subject 7",3,"0107",2016-07-18 09:07:53,84.3275,66.7945,0.4,0.792,0,7.72,NA,NA,282,61,NA,NA,0,2016-07-18 09:00:00,2016-07-18,144,6
		938,"Subject 7",3,"0107",2016-07-18 09:35:53,84.1495,65.148,0.4,0.774,0,7.72,NA,NA,842,34,NA,NA,0,2016-07-18 09:00:00,2016-07-18,144,6
		939,"Subject 7",3,"0107",2016-07-18 10:03:53,89.0445,71.823,0.4,0.807,0.04,7.76,NA,NA,1310,48,NA,NA,0,2016-07-18 10:00:00,2016-07-18,145,6
		940,"Subject 7",3,"0107",2016-07-18 10:31:53,82.681,63.9465,0.4,0.773,0,7.76,NA,NA,921,15,NA,NA,0,2016-07-18 10:00:00,2016-07-18,145,6
		941,"Subject 7",3,"0107",NA,0,0,0,0,0,0,NA,NA,0,0,NA,NA,0,NA,NA,NA,NA
		942,"Subject 7",3,NA,NA,NA,NA,NA,NA,NA,NA,NA,NA,NA,NA,NA,NA,NA,NA,NA,NA,NA
		943,"Subject 8",4,"0108",2016-07-12 09:25:53,144.4803,113.082,0.7,0.783,0.07,0.07,NA,NA,6019,4325,NA,NA,0,2016-07-12 09:00:00,2016-07-12,0,0
		944,"Subject 8",4,"0108",2016-07-12 09:53:53,128.5205,98.8064,0.6,0.769,0.12,0.19,NA,NA,6756,4926,NA,NA,0,2016-07-12 09:00:00,2016-07-12,0,0
		945,"Subject 8",4,"0108",2016-07-12 10:21:53,124.5506,94.5157,0.6,0.759,0.34,0.53,NA,NA,6879,4969,NA,NA,0,2016-07-12 10:00:00,2016-07-12,1,0
		946,"Subject 8",4,"0108",2016-07-12 10:49:53,112.5607,89.3027,0.5,0.793,0,0.53,NA,NA,3437,2171,NA,NA,0,2016-07-12 10:00:00,2016-07-12,1,0
		947,"Subject 8",4,"0108",2016-07-12 11:17:53,122.305,96.9618,0.6,0.793,-0.01,0.52,NA,NA,2325,1357,NA,NA,0,2016-07-12 11:00:00,2016-07-12,2,0
		948,"Subject 8",4,"0108",2016-07-12 11:45:53,129.523,103.057,0.6,0.796,-0.01,0.51,NA,NA,2206,1386,NA,NA,0,2016-07-12 11:00:00,2016-07-12,2,0
		949,"Subject 8",4,"0108",2016-07-12 12:13:53,110.9968,89.3428,0.5,0.805,0.04,0.55,NA,NA,2288,1179,NA,NA,0,2016-07-12 12:00:00,2016-07-12,3,0
		950,"Subject 8",4,"0108",2016-07-12 12:41:53,118.7361,92.0295,0.6,0.775,-0.01,0.54,NA,NA,2334,1810,NA,NA,0,2016-07-12 12:00:00,2016-07-12,3,0
		951,"Subject 8",4,"0108",2016-07-12 13:09:53,113.4028,88.5809,0.5,0.781,0.01,0.55,NA,NA,2985,978,NA,NA,0,2016-07-12 13:00:00,2016-07-12,4,0
		952,"Subject 8",4,"0108",2016-07-12 13:37:53,90.1448,68.8517,0.4,0.764,-0.01,0.54,NA,NA,1610,885,NA,NA,0,2016-07-12 13:00:00,2016-07-12,4,0
		953,"Subject 8",4,"0108",2016-07-12 14:05:53,92.3904,71.3379,0.4,0.772,0,0.54,NA,NA,692,252,NA,NA,0,2016-07-12 14:00:00,2016-07-12,5,0
		954,"Subject 8",4,"0108",2016-07-12 14:33:53,86.0546,67.6487,0.4,0.786,0.01,0.55,NA,NA,1800,87,NA,NA,0,2016-07-12 14:00:00,2016-07-12,5,0
		955,"Subject 8",4,"0108",2016-07-12 15:01:53,81.2827,64.2402,0.4,0.791,-0.01,0.54,NA,NA,212,55,NA,NA,0,2016-07-12 15:00:00,2016-07-12,6,0
		956,"Subject 8",4,"0108",2016-07-12 15:29:53,100.7713,79.5584,0.5,0.79,0.01,0.55,NA,NA,2764,1079,NA,NA,0,2016-07-12 15:00:00,2016-07-12,6,0
		957,"Subject 8",4,"0108",2016-07-12 15:57:53,87.0571,67.769,0.4,0.778,-0.01,0.54,NA,NA,1022,78,NA,NA,0,2016-07-12 15:00:00,2016-07-12,6,0
		958,"Subject 8",4,"0108",2016-07-12 16:25:53,79.5985,62.2352,0.4,0.782,0.01,0.55,NA,NA,1890,26,NA,NA,0,2016-07-12 16:00:00,2016-07-12,7,0
		959,"Subject 8",4,"0108",2016-07-12 16:53:53,84.21,64.0798,0.4,0.761,-0.01,0.54,NA,NA,1910,373,NA,NA,0,2016-07-12 16:00:00,2016-07-12,7,0
		960,"Subject 8",4,"0108",2016-07-12 17:21:53,83.3679,65.6437,0.4,0.788,0.01,0.55,NA,NA,557,20,NA,NA,0,2016-07-12 17:00:00,2016-07-12,8,0
		961,"Subject 8",4,"0108",2016-07-12 17:49:53,98.0445,81.4832,0.5,0.831,0.12,0.67,NA,NA,1392,289,NA,NA,0,2016-07-12 17:00:00,2016-07-12,8,0
		962,"Subject 8",4,"0108",2016-07-12 18:17:53,114.8063,94.2751,0.6,0.821,0,0.67,NA,NA,2123,759,NA,NA,0,2016-07-12 18:00:00,2016-07-12,9,0
		963,"Subject 8",4,"0108",2016-07-12 18:45:53,114.8865,92.7914,0.6,0.808,0.11,0.78,NA,NA,2103,680,NA,NA,0,2016-07-12 18:00:00,2016-07-12,9,0
		964,"Subject 8",4,"0108",2016-07-12 19:13:53,129.8037,105.9041,0.6,0.816,0,0.78,NA,NA,4950,2187,NA,NA,0,2016-07-12 19:00:00,2016-07-12,10,0
		965,"Subject 8",4,"0108",2016-07-12 19:41:53,131.127,104.3803,0.6,0.796,0.08,0.86,NA,NA,7748,4101,NA,NA,0,2016-07-12 19:00:00,2016-07-12,10,0
		966,"Subject 8",4,"0108",2016-07-12 20:09:53,117.3727,93.7137,0.6,0.799,0.05,0.91,NA,NA,6816,3667,NA,NA,0,2016-07-12 20:00:00,2016-07-12,11,0
		967,"Subject 8",4,"0108",2016-07-12 20:37:53,120.4604,95.9994,0.6,0.797,0.12,1.03,NA,NA,6030,2973,NA,NA,0,2016-07-12 20:00:00,2016-07-12,11,0
		968,"Subject 8",4,"0108",2016-07-12 21:05:53,116.0494,95.839,0.6,0.826,0.11,1.14,NA,NA,4045,1272,NA,NA,0,2016-07-12 21:00:00,2016-07-12,12,0
		969,"Subject 8",4,"0108",2016-07-12 21:33:53,109.9542,88.8215,0.5,0.808,0,1.14,NA,NA,1338,636,NA,NA,0,2016-07-12 21:00:00,2016-07-12,12,0
		970,"Subject 8",4,"0108",2016-07-12 22:01:53,125.4729,103.458,0.6,0.825,0.13,1.27,NA,NA,6915,3666,NA,NA,0,2016-07-12 22:00:00,2016-07-12,13,0
		971,"Subject 8",4,"0108",2016-07-12 22:29:53,103.2575,80.4807,0.5,0.779,0.07,1.34,NA,NA,2788,459,NA,NA,0,2016-07-12 22:00:00,2016-07-12,13,0
		972,"Subject 8",4,"0108",2016-07-12 22:57:53,92.9518,73.2627,0.4,0.788,0.02,1.36,NA,NA,3487,1531,NA,NA,0,2016-07-12 22:00:00,2016-07-12,13,0
		973,"Subject 8",4,"0108",2016-07-12 23:25:53,97.1623,78.8767,0.5,0.812,0.11,1.47,NA,NA,2900,1118,NA,NA,0,2016-07-12 23:00:00,2016-07-12,14,0
		974,"Subject 8",4,"0108",2016-07-12 23:53:53,104.8214,88.2601,0.5,0.842,0.1,1.57,NA,NA,1984,565,NA,NA,0,2016-07-12 23:00:00,2016-07-12,14,0
		975,"Subject 8",4,"0108",2016-07-13 00:21:53,107.3076,89.2225,0.5,0.831,0.08,1.65,NA,NA,2256,943,NA,NA,0,2016-07-13 00:00:00,2016-07-13,15,1
		976,"Subject 8",4,"0108",2016-07-13 00:49:53,86.6962,70.4958,0.4,0.813,0.14,1.79,NA,NA,2594,698,NA,NA,0,2016-07-13 00:00:00,2016-07-13,15,1
		977,"Subject 8",4,"0108",2016-07-13 01:17:53,87.6586,73.9444,0.4,0.843,0.1,1.89,NA,NA,618,43,NA,NA,0,2016-07-13 01:00:00,2016-07-13,16,1
		978,"Subject 8",4,"0108",2016-07-13 01:45:53,94.3954,75.6687,0.5,0.801,0,1.89,NA,NA,843,68,NA,NA,0,2016-07-13 01:00:00,2016-07-13,16,1
		979,"Subject 8",4,"0108",2016-07-13 02:13:53,75.4281,56.8618,0.4,0.754,0,1.89,NA,NA,510,108,NA,NA,0,2016-07-13 02:00:00,2016-07-13,17,1
		980,"Subject 8",4,"0108",2016-07-13 02:41:53,88.0997,70.8968,0.4,0.805,0.13,2.02,NA,NA,4044,852,NA,NA,0,2016-07-13 02:00:00,2016-07-13,17,1
		981,"Subject 8",4,"0108",2016-07-13 03:09:53,105.3026,87.819,0.5,0.834,0.08,2.1,NA,NA,3778,62,NA,NA,0,2016-07-13 03:00:00,2016-07-13,18,1
		982,"Subject 8",4,"0108",2016-07-13 03:37:53,90.225,72.4206,0.4,0.803,0.01,2.11,NA,NA,1162,240,NA,NA,0,2016-07-13 03:00:00,2016-07-13,18,1
		983,"Subject 8",4,"0108",2016-07-13 04:05:53,105.4229,91.7087,0.5,0.87,0.08,2.19,NA,NA,984,140,NA,NA,0,2016-07-13 04:00:00,2016-07-13,19,1
		984,"Subject 8",4,"0108",2016-07-13 04:33:53,113.7236,95.3177,0.6,0.838,0.09,2.28,NA,NA,2228,669,NA,NA,0,2016-07-13 04:00:00,2016-07-13,19,1
		985,"Subject 8",4,"0108",2016-07-13 05:01:53,116.1296,98.4455,0.6,0.848,0.08,2.36,NA,NA,5948,2600,NA,NA,0,2016-07-13 05:00:00,2016-07-13,20,1
		986,"Subject 8",4,"0108",2016-07-13 05:29:53,120.8213,96.9217,0.6,0.802,0.01,2.37,NA,NA,2943,985,NA,NA,0,2016-07-13 05:00:00,2016-07-13,20,1
		987,"Subject 8",4,"0108",2016-07-13 05:57:53,94.7964,77.1925,0.5,0.814,0.11,2.48,NA,NA,5060,2227,NA,NA,0,2016-07-13 05:00:00,2016-07-13,20,1
		988,"Subject 8",4,"0108",2016-07-13 06:25:53,93.5132,71.2577,0.4,0.762,0,2.48,NA,NA,2649,104,NA,NA,0,2016-07-13 06:00:00,2016-07-13,21,1
		989,"Subject 8",4,"0108",2016-07-13 06:53:53,120.4203,98.7663,0.6,0.82,0.06,2.54,NA,NA,3926,2144,NA,NA,0,2016-07-13 06:00:00,2016-07-13,21,1
		990,"Subject 8",4,"0108",2016-07-13 07:21:53,89.1423,68.9319,0.4,0.773,0.03,2.57,NA,NA,2184,433,NA,NA,0,2016-07-13 07:00:00,2016-07-13,22,1
		991,"Subject 8",4,"0108",2016-07-13 07:49:53,105.5031,82.8867,0.5,0.786,0.05,2.62,NA,NA,671,65,NA,NA,0,2016-07-13 07:00:00,2016-07-13,22,1
		992,"Subject 8",4,"0108",2016-07-13 08:17:53,82.8867,68.8918,0.4,0.831,0.06,2.68,NA,NA,377,79,NA,NA,0,2016-07-13 08:00:00,2016-07-13,23,1
		993,"Subject 8",4,"0108",2016-07-13 08:45:53,80.6411,65.2427,0.4,0.809,0,2.68,NA,NA,3875,168,NA,NA,0,2016-07-13 08:00:00,2016-07-13,23,1
		994,"Subject 8",4,"0108",2016-07-13 09:13:53,84.5308,67.0873,0.4,0.794,0.04,2.72,NA,NA,3675,202,NA,NA,0,2016-07-13 09:00:00,2016-07-13,24,1
		995,"Subject 8",4,"0108",2016-07-13 09:41:53,91.829,79.3178,0.4,0.864,0.07,2.79,NA,NA,1425,157,NA,NA,0,2016-07-13 09:00:00,2016-07-13,24,1
		996,"Subject 8",4,"0108",2016-07-13 10:09:53,84.8115,67.0472,0.4,0.791,-0.01,2.78,NA,NA,539,32,NA,NA,0,2016-07-13 10:00:00,2016-07-13,25,1
		997,"Subject 8",4,"0108",2016-07-13 10:37:53,101.8139,83.809,0.5,0.823,0.07,2.85,NA,NA,3288,1067,NA,NA,0,2016-07-13 10:00:00,2016-07-13,25,1
		998,"Subject 8",4,"0108",2016-07-13 11:05:53,86.0947,68.6913,0.4,0.798,0.01,2.86,NA,NA,309,25,NA,NA,0,2016-07-13 11:00:00,2016-07-13,26,1
		999,"Subject 8",4,"0108",2016-07-13 11:33:53,96.4004,79.6787,0.5,0.826,0.09,2.95,NA,NA,1089,165,NA,NA,0,2016-07-13 11:00:00,2016-07-13,26,1
		1000,"Subject 8",4,"0108",2016-07-13 12:01:53,89.423,69.774,0.4,0.78,-0.01,2.94,NA,NA,1218,176,NA,NA,0,2016-07-13 12:00:00,2016-07-13,27,1
		1001,"Subject 8",4,"0108",2016-07-13 12:29:53,73.383,62.0347,0.4,0.845,0.1,3.04,NA,NA,3026,181,NA,NA,0,2016-07-13 12:00:00,2016-07-13,27,1
		1002,"Subject 8",4,"0108",2016-07-13 12:57:53,92.7513,80.7614,0.5,0.871,0.02,3.06,NA,NA,2666,359,NA,NA,0,2016-07-13 12:00:00,2016-07-13,27,1
		1003,"Subject 8",4,"0108",2016-07-13 13:25:53,89.5433,70.175,0.4,0.784,0.01,3.07,NA,NA,1085,203,NA,NA,0,2016-07-13 13:00:00,2016-07-13,28,1
		1004,"Subject 8",4,"0108",2016-07-13 13:53:53,93.2325,77.1925,0.5,0.828,0,3.07,NA,NA,549,99,NA,NA,0,2016-07-13 13:00:00,2016-07-13,28,1
		1005,"Subject 8",4,"0108",2016-07-13 14:21:53,116.4905,89.7037,0.6,0.77,0,3.07,NA,NA,4571,1784,NA,NA,0,2016-07-13 14:00:00,2016-07-13,29,1
		1006,"Subject 8",4,"0108",2016-07-13 14:49:53,76.9519,60.9119,0.4,0.792,-0.01,3.06,NA,NA,5645,1416,NA,NA,0,2016-07-13 14:00:00,2016-07-13,29,1
		1007,"Subject 8",4,"0108",2016-07-13 15:17:53,100.6109,75.4281,0.5,0.75,0,3.06,NA,NA,2283,334,NA,NA,0,2016-07-13 15:00:00,2016-07-13,30,1
		1008,"Subject 8",4,"0108",2016-07-13 15:45:53,97.6836,74.2251,0.5,0.76,0,3.06,NA,NA,1159,241,NA,NA,0,2016-07-13 15:00:00,2016-07-13,30,1
		1009,"Subject 8",4,"0108",2016-07-13 16:13:53,102.656,77.1524,0.5,0.752,0.01,3.07,NA,NA,1786,271,NA,NA,0,2016-07-13 16:00:00,2016-07-13,31,1
		1010,"Subject 8",4,"0108",2016-07-13 16:41:53,94.1548,70.8166,0.4,0.752,0,3.07,NA,NA,901,134,NA,NA,0,2016-07-13 16:00:00,2016-07-13,31,1
		1011,"Subject 8",4,"0108",2016-07-13 17:09:53,103.6585,80.8416,0.5,0.78,0,3.07,NA,NA,898,211,NA,NA,0,2016-07-13 17:00:00,2016-07-13,32,1
		1012,"Subject 8",4,"0108",2016-07-13 17:37:53,98.6861,75.7489,0.5,0.768,0,3.07,NA,NA,495,93,NA,NA,0,2016-07-13 17:00:00,2016-07-13,32,1
		1013,"Subject 8",4,"0108",2016-07-13 18:05:53,107.6284,83.0471,0.5,0.772,0,3.07,NA,NA,1670,288,NA,NA,0,2016-07-13 18:00:00,2016-07-13,33,1
		1014,"Subject 8",4,"0108",2016-07-13 18:33:53,118.8163,96.4004,0.6,0.811,0.07,3.14,NA,NA,2159,524,NA,NA,0,2016-07-13 18:00:00,2016-07-13,33,1
		1015,"Subject 8",4,"0108",2016-07-13 19:01:53,140.5104,110.4354,0.7,0.786,0.05,3.19,NA,NA,4175,1437,NA,NA,0,2016-07-13 19:00:00,2016-07-13,34,1
		1016,"Subject 8",4,"0108",2016-07-13 19:29:53,112.4404,88.2601,0.5,0.785,0.03,3.22,NA,NA,2964,607,NA,NA,0,2016-07-13 19:00:00,2016-07-13,34,1
		1017,"Subject 8",4,"0108",2016-07-13 19:57:53,144.1194,119.1371,0.7,0.827,0.15,3.37,NA,NA,3701,1610,NA,NA,0,2016-07-13 19:00:00,2016-07-13,34,1
		1018,"Subject 8",4,"0108",2016-07-13 20:25:53,104.0194,81.3629,0.5,0.782,0,3.37,NA,NA,1483,301,NA,NA,0,2016-07-13 20:00:00,2016-07-13,35,1
		1019,"Subject 8",4,"0108",2016-07-13 20:53:53,113.7236,95.3177,0.6,0.838,0.1,3.47,NA,NA,3252,840,NA,NA,0,2016-07-13 20:00:00,2016-07-13,35,1
		1020,"Subject 8",4,"0108",2016-07-13 21:21:53,115.5682,88.3403,0.5,0.764,0.12,3.59,NA,NA,498,126,NA,NA,0,2016-07-13 21:00:00,2016-07-13,36,1
		1021,"Subject 8",4,"0108",2016-07-13 21:49:53,116.0895,92.9518,0.6,0.801,0.06,3.65,NA,NA,1819,433,NA,NA,0,2016-07-13 21:00:00,2016-07-13,36,1
		1022,"Subject 8",4,"0108",2016-07-13 22:17:53,106.8665,88.9819,0.5,0.833,0.11,3.76,NA,NA,1904,391,NA,NA,0,2016-07-13 22:00:00,2016-07-13,37,1
		1023,"Subject 8",4,"0108",2016-07-13 22:45:53,129.4829,109.5532,0.6,0.846,0.12,3.88,NA,NA,1977,607,NA,NA,0,2016-07-13 22:00:00,2016-07-13,37,1
		1024,"Subject 8",4,"0108",2016-07-13 23:13:53,139.5881,116.5306,0.7,0.835,0.15,4.03,NA,NA,5774,2489,NA,NA,0,2016-07-13 23:00:00,2016-07-13,38,1
		1025,"Subject 8",4,"0108",2016-07-13 23:41:53,117.493,94.1147,0.6,0.801,-0.01,4.02,NA,NA,2078,385,NA,NA,0,2016-07-13 23:00:00,2016-07-13,38,1
		1026,"Subject 8",4,"0108",2016-07-14 00:09:53,135.5781,116.5306,0.7,0.86,0.22,4.24,NA,NA,3157,1229,NA,NA,0,2016-07-14 00:00:00,2016-07-14,39,2
		1027,"Subject 8",4,"0108",2016-07-14 00:37:53,99.7287,81.7238,0.5,0.82,0,4.24,NA,NA,2128,477,NA,NA,0,2016-07-14 00:00:00,2016-07-14,39,2
		1028,"Subject 8",4,"0108",2016-07-14 01:05:53,111.3577,92.4305,0.5,0.83,0.09,4.33,NA,NA,875,239,NA,NA,0,2016-07-14 01:00:00,2016-07-14,40,2
		1029,"Subject 8",4,"0108",2016-07-14 01:33:53,104.7011,85.8942,0.5,0.82,0.01,4.34,NA,NA,1478,68,NA,NA,0,2016-07-14 01:00:00,2016-07-14,40,2
		1030,"Subject 8",4,"0108",2016-07-14 02:01:53,96.5207,77.3128,0.5,0.801,0.12,4.46,NA,NA,2197,287,NA,NA,0,2016-07-14 02:00:00,2016-07-14,41,2
		1031,"Subject 8",4,"0108",2016-07-14 02:29:53,96.8415,80.9619,0.5,0.836,0.01,4.47,NA,NA,728,207,NA,NA,0,2016-07-14 02:00:00,2016-07-14,41,2
		1032,"Subject 8",4,"0108",2016-07-14 02:57:53,98.245,79.0772,0.5,0.805,0.07,4.54,NA,NA,400,93,NA,NA,0,2016-07-14 02:00:00,2016-07-14,41,2
		1033,"Subject 8",4,"0108",2016-07-14 03:25:53,106.8264,93.3929,0.5,0.874,-0.01,4.53,NA,NA,1052,220,NA,NA,0,2016-07-14 03:00:00,2016-07-14,42,2
		1034,"Subject 8",4,"0108",2016-07-14 03:53:53,108.27,88.0596,0.5,0.813,0.08,4.61,NA,NA,740,117,NA,NA,0,2016-07-14 03:00:00,2016-07-14,42,2
		1035,"Subject 8",4,"0108",2016-07-14 04:21:53,131.7285,106.7863,0.6,0.811,0.09,4.7,NA,NA,3802,1281,NA,NA,0,2016-07-14 04:00:00,2016-07-14,43,2
		1036,"Subject 8",4,"0108",2016-07-14 04:49:53,118.0945,95.037,0.6,0.805,0.04,4.74,NA,NA,2468,607,NA,NA,0,2016-07-14 04:00:00,2016-07-14,43,2
		1037,"Subject 8",4,"0108",2016-07-14 05:17:53,115.6083,96.1999,0.6,0.832,0.13,4.87,NA,NA,4363,1758,NA,NA,0,2016-07-14 05:00:00,2016-07-14,44,2
		1038,"Subject 8",4,"0108",2016-07-14 05:45:53,110.275,85.6937,0.5,0.777,0,4.87,NA,NA,1019,195,NA,NA,0,2016-07-14 05:00:00,2016-07-14,44,2
		1039,"Subject 8",4,"0108",2016-07-14 06:13:53,131.8889,110.3552,0.6,0.837,0.16,5.03,NA,NA,4107,1882,NA,NA,0,2016-07-14 06:00:00,2016-07-14,45,2
		1040,"Subject 8",4,"0108",2016-07-14 06:41:53,94.7563,72.9419,0.5,0.77,0,5.03,NA,NA,2299,623,NA,NA,0,2016-07-14 06:00:00,2016-07-14,45,2
		1041,"Subject 8",4,"0108",2016-07-14 07:09:53,100.0896,76.4306,0.5,0.764,0.01,5.04,NA,NA,518,106,NA,NA,0,2016-07-14 07:00:00,2016-07-14,46,2
		1042,"Subject 8",4,"0108",2016-07-14 07:37:53,95.5583,76.6712,0.5,0.802,0.08,5.12,NA,NA,2650,483,NA,NA,0,2016-07-14 07:00:00,2016-07-14,46,2
		1043,"Subject 8",4,"0108",2016-07-14 08:05:53,92.7513,73.3429,0.4,0.791,0.01,5.13,NA,NA,2867,133,NA,NA,0,2016-07-14 08:00:00,2016-07-14,47,2
		1044,"Subject 8",4,"0108",2016-07-14 08:33:53,102.4555,83.8892,0.5,0.819,0.13,5.26,NA,NA,1181,243,NA,NA,0,2016-07-14 08:00:00,2016-07-14,47,2
		1045,"Subject 8",4,"0108",2016-07-14 09:01:53,93.8741,76.3504,0.5,0.813,0,5.26,NA,NA,397,66,NA,NA,0,2016-07-14 09:00:00,2016-07-14,48,2
		1046,"Subject 8",4,"0108",2016-07-14 09:29:53,95.037,75.3479,0.5,0.793,0.03,5.29,NA,NA,1334,317,NA,NA,0,2016-07-14 09:00:00,2016-07-14,48,2
		1047,"Subject 8",4,"0108",2016-07-14 09:57:53,94.7964,73.9845,0.5,0.78,0,5.29,NA,NA,435,93,NA,NA,0,2016-07-14 09:00:00,2016-07-14,48,2
		1048,"Subject 8",4,"0108",2016-07-14 10:25:53,93.1122,76.0697,0.4,0.817,0.05,5.34,NA,NA,829,166,NA,NA,0,2016-07-14 10:00:00,2016-07-14,49,2
		1049,"Subject 8",4,"0108",2016-07-14 10:53:53,95.1974,74.7865,0.5,0.786,0.01,5.35,NA,NA,731,89,NA,NA,0,2016-07-14 10:00:00,2016-07-14,49,2
		1050,"Subject 8",4,"0108",2016-07-14 11:21:53,90.9869,75.3078,0.4,0.827,0.07,5.42,NA,NA,888,218,NA,NA,0,2016-07-14 11:00:00,2016-07-14,50,2
		1051,"Subject 8",4,"0108",2016-07-14 11:49:53,89.7839,70.3755,0.4,0.784,0,5.42,NA,NA,771,128,NA,NA,0,2016-07-14 11:00:00,2016-07-14,50,2
		1052,"Subject 8",4,"0108",2016-07-14 12:17:53,111.4379,93.1924,0.5,0.836,0.14,5.56,NA,NA,3567,830,NA,NA,0,2016-07-14 12:00:00,2016-07-14,51,2
		1053,"Subject 8",4,"0108",2016-07-14 12:45:53,99.5282,80.4406,0.5,0.808,0,5.56,NA,NA,596,88,NA,NA,0,2016-07-14 12:00:00,2016-07-14,51,2
		1054,"Subject 8",4,"0108",2016-07-14 13:13:53,95.0771,74.9469,0.5,0.788,0.01,5.57,NA,NA,766,70,NA,NA,0,2016-07-14 13:00:00,2016-07-14,52,2
		1055,"Subject 8",4,"0108",2016-07-14 13:41:53,114.686,88.22,0.5,0.769,0,5.57,NA,NA,2342,467,NA,NA,0,2016-07-14 13:00:00,2016-07-14,52,2
		1056,"Subject 8",4,"0108",2016-07-14 14:09:53,99.1272,75.789,0.5,0.765,-0.01,5.56,NA,NA,1677,256,NA,NA,0,2016-07-14 14:00:00,2016-07-14,53,2
		1057,"Subject 8",4,"0108",2016-07-14 14:37:53,103.4179,78.4356,0.5,0.758,0,5.56,NA,NA,1573,357,NA,NA,0,2016-07-14 14:00:00,2016-07-14,53,2
		1058,"Subject 8",4,"0108",2016-07-14 15:05:53,98.646,74.5058,0.5,0.755,0.01,5.57,NA,NA,1585,127,NA,NA,0,2016-07-14 15:00:00,2016-07-14,54,2
		1059,"Subject 8",4,"0108",2016-07-14 15:33:53,100.8515,76.2702,0.5,0.756,0,5.57,NA,NA,309,29,NA,NA,0,2016-07-14 15:00:00,2016-07-14,54,2
		1060,"Subject 8",4,"0108",2016-07-14 16:01:53,100.8916,76.6311,0.5,0.759,0,5.57,NA,NA,1828,99,NA,NA,0,2016-07-14 16:00:00,2016-07-14,55,2
		1061,"Subject 8",4,"0108",2016-07-14 16:29:53,90.4255,68.5309,0.4,0.758,0,5.57,NA,NA,182,77,NA,NA,0,2016-07-14 16:00:00,2016-07-14,55,2
		1062,"Subject 8",4,"0108",2016-07-14 16:57:53,112.3602,91.5884,0.5,0.815,0.06,5.63,NA,NA,2492,354,NA,NA,0,2016-07-14 16:00:00,2016-07-14,55,2
		1063,"Subject 8",4,"0108",2016-07-14 17:25:53,100.3302,77.5534,0.5,0.773,0.01,5.64,NA,NA,319,9,NA,NA,0,2016-07-14 17:00:00,2016-07-14,56,2
		1064,"Subject 8",4,"0108",2016-07-14 17:53:53,105.5031,82.4055,0.5,0.781,0.04,5.68,NA,NA,8686,161,NA,NA,0,2016-07-14 17:00:00,2016-07-14,56,2
		1065,"Subject 8",4,"0108",2016-07-14 18:21:53,125.3927,107.7487,0.6,0.859,0.04,5.72,NA,NA,2794,468,NA,NA,0,2016-07-14 18:00:00,2016-07-14,57,2
		1066,"Subject 8",4,"0108",2016-07-14 18:49:53,121.1822,101.2926,0.6,0.836,0.16,5.88,NA,NA,5912,2648,NA,NA,0,2016-07-14 18:00:00,2016-07-14,57,2
		1067,"Subject 8",4,"0108",2016-07-14 19:17:53,126.9967,106.3452,0.6,0.837,0.15,6.03,NA,NA,4184,868,NA,NA,0,2016-07-14 19:00:00,2016-07-14,58,2
		1068,"Subject 8",4,"0108",2016-07-14 19:45:53,105.3026,85.0521,0.5,0.808,0.02,6.05,NA,NA,3189,1377,NA,NA,0,2016-07-14 19:00:00,2016-07-14,58,2
		1069,"Subject 8",4,"0108",2016-07-14 20:13:53,133.4528,111.9191,0.6,0.839,0.15,6.2,NA,NA,4454,2065,NA,NA,0,2016-07-14 20:00:00,2016-07-14,59,2
		1070,"Subject 8",4,"0108",2016-07-14 20:41:53,98.646,77.6737,0.5,0.788,0,6.2,NA,NA,794,138,NA,NA,0,2016-07-14 20:00:00,2016-07-14,59,2
		1071,"Subject 8",4,"0108",2016-07-14 21:09:53,134.6558,113.1221,0.7,0.84,0.14,6.34,NA,NA,5474,2416,NA,NA,0,2016-07-14 21:00:00,2016-07-14,60,2
		1072,"Subject 8",4,"0108",2016-07-14 21:37:53,105.8239,82.0045,0.5,0.775,0,6.34,NA,NA,2149,603,NA,NA,0,2016-07-14 21:00:00,2016-07-14,60,2
		1073,"Subject 8",4,"0108",2016-07-14 22:05:53,112.0795,88.5408,0.5,0.79,0.06,6.4,NA,NA,789,132,NA,NA,0,2016-07-14 22:00:00,2016-07-14,61,2
		1074,"Subject 8",4,"0108",2016-07-14 22:33:53,138.7861,114.8464,0.7,0.828,0.19,6.59,NA,NA,3709,1619,NA,NA,0,2016-07-14 22:00:00,2016-07-14,61,2
		1075,"Subject 8",4,"0108",2016-07-14 23:01:53,116.1296,94.9969,0.6,0.818,0.02,6.61,NA,NA,6310,2942,NA,NA,0,2016-07-14 23:00:00,2016-07-14,62,2
		1076,"Subject 8",4,"0108",2016-07-14 23:29:53,110.4354,84.9318,0.5,0.769,-0.01,6.6,NA,NA,1447,270,NA,NA,0,2016-07-14 23:00:00,2016-07-14,62,2
		1077,"Subject 8",4,"0108",2016-07-14 23:57:53,111.5582,90.7864,0.5,0.814,0.11,6.71,NA,NA,1996,86,NA,NA,0,2016-07-14 23:00:00,2016-07-14,62,2
		1078,"Subject 8",4,"0108",2016-07-15 00:25:53,138.5856,119.0168,0.7,0.859,0.18,6.89,NA,NA,5933,2727,NA,NA,0,2016-07-15 00:00:00,2016-07-15,63,3
		1079,"Subject 8",4,"0108",2016-07-15 00:53:53,92.3102,74.7865,0.4,0.81,0.06,6.95,NA,NA,3989,1623,NA,NA,0,2016-07-15 00:00:00,2016-07-15,63,3
		1080,"Subject 8",4,"0108",2016-07-15 01:21:53,106.7462,83.6085,0.5,0.783,0,6.95,NA,NA,253,39,NA,NA,0,2016-07-15 01:00:00,2016-07-15,64,3
		1081,"Subject 8",4,"0108",2016-07-15 01:49:53,102.9367,84.4506,0.5,0.821,0.11,7.06,NA,NA,2577,199,NA,NA,0,2016-07-15 01:00:00,2016-07-15,64,3
		1082,"Subject 8",4,"0108",2016-07-15 02:17:53,110.8364,93.834,0.5,0.847,0.03,7.09,NA,NA,1859,211,NA,NA,0,2016-07-15 02:00:00,2016-07-15,65,3
		1083,"Subject 8",4,"0108",2016-07-15 02:45:53,110.5958,86.215,0.5,0.779,0.04,7.13,NA,NA,544,79,NA,NA,0,2016-07-15 02:00:00,2016-07-15,65,3
		1084,"Subject 8",4,"0108",2016-07-15 03:13:53,105.1823,89.9042,0.5,0.855,0.1,7.23,NA,NA,1687,140,NA,NA,0,2016-07-15 03:00:00,2016-07-15,66,3
		1085,"Subject 8",4,"0108",2016-07-15 03:41:53,104.4605,84.0496,0.5,0.805,0,7.23,NA,NA,1701,70,NA,NA,0,2016-07-15 03:00:00,2016-07-15,66,3
		1086,"Subject 8",4,"0108",2016-07-15 04:09:53,106.8665,84.1699,0.5,0.788,0.06,7.29,NA,NA,2670,331,NA,NA,0,2016-07-15 04:00:00,2016-07-15,67,3
		1087,"Subject 8",4,"0108",2016-07-15 04:37:53,134.5355,108.0294,0.6,0.803,0.16,7.45,NA,NA,2781,781,NA,NA,0,2016-07-15 04:00:00,2016-07-15,67,3
		1088,"Subject 8",4,"0108",2016-07-15 05:05:53,104.9417,85.5734,0.5,0.815,0.06,7.51,NA,NA,2944,1120,NA,NA,0,2016-07-15 05:00:00,2016-07-15,68,3
		1089,"Subject 8",4,"0108",2016-07-15 05:33:53,123.8288,103.4981,0.6,0.836,0.12,7.63,NA,NA,2199,642,NA,NA,0,2016-07-15 05:00:00,2016-07-15,68,3
		1090,"Subject 8",4,"0108",2016-07-15 06:01:53,98.5257,79.1975,0.5,0.804,0.05,7.68,NA,NA,3701,1120,NA,NA,0,2016-07-15 06:00:00,2016-07-15,69,3
		1091,"Subject 8",4,"0108",2016-07-15 06:29:53,94.7162,73.8642,0.5,0.78,-0.01,7.67,NA,NA,1582,38,NA,NA,0,2016-07-15 06:00:00,2016-07-15,69,3
		1092,"Subject 8",4,"0108",2016-07-15 06:57:53,101.0119,81.804,0.5,0.81,0.12,7.79,NA,NA,1856,133,NA,NA,0,2016-07-15 06:00:00,2016-07-15,69,3
		1093,"Subject 8",4,"0108",2016-07-15 07:25:53,92.7914,76.5108,0.4,0.825,0.04,7.83,NA,NA,794,79,NA,NA,0,2016-07-15 07:00:00,2016-07-15,70,3
		1094,"Subject 8",4,"0108",2016-07-15 07:53:53,92.9919,75.3078,0.4,0.81,0.02,7.85,NA,NA,1421,61,NA,NA,0,2016-07-15 07:00:00,2016-07-15,70,3
		1095,"Subject 8",4,"0108",2016-07-15 08:21:53,98.5257,78.0346,0.5,0.792,0.03,7.88,NA,NA,2737,264,NA,NA,0,2016-07-15 08:00:00,2016-07-15,71,3
		1096,"Subject 8",4,"0108",2016-07-15 08:49:53,102.6159,82.9669,0.5,0.809,0.04,7.92,NA,NA,1533,76,NA,NA,0,2016-07-15 08:00:00,2016-07-15,71,3
		1097,"Subject 8",4,"0108",2016-07-15 09:17:53,95.438,75.0271,0.5,0.786,0,7.92,NA,NA,1297,257,NA,NA,0,2016-07-15 09:00:00,2016-07-15,72,3
		1098,"Subject 8",4,"0108",2016-07-15 09:45:53,95.0771,74.3855,0.5,0.782,0,7.92,NA,NA,542,38,NA,NA,0,2016-07-15 09:00:00,2016-07-15,72,3
		1099,"Subject 8",4,"0108",2016-07-15 10:13:53,94.4355,74.586,0.5,0.79,0.01,7.93,NA,NA,1162,53,NA,NA,0,2016-07-15 10:00:00,2016-07-15,73,3
		1100,"Subject 8",4,"0108",2016-07-15 10:41:53,99.8891,80.0396,0.5,0.801,0.06,7.99,NA,NA,2369,304,NA,NA,0,2016-07-15 10:00:00,2016-07-15,73,3
		1101,"Subject 8",4,"0108",2016-07-15 11:09:53,151.979,117.1722,0.7,0.771,0,7.99,NA,NA,1219,355,NA,NA,0,2016-07-15 11:00:00,2016-07-15,74,3
		1102,"Subject 8",4,"0108",2016-07-15 11:37:53,96.7212,77.4732,0.5,0.801,0,7.99,NA,NA,826,129,NA,NA,0,2016-07-15 11:00:00,2016-07-15,74,3
		1103,"Subject 8",4,"0108",2016-07-15 12:05:53,97.5232,76.6311,0.5,0.786,0,7.99,NA,NA,233,60,NA,NA,0,2016-07-15 12:00:00,2016-07-15,75,3
		1104,"Subject 8",4,"0108",2016-07-15 12:33:53,93.6736,71.0171,0.4,0.758,-0.01,7.98,NA,NA,1455,405,NA,NA,0,2016-07-15 12:00:00,2016-07-15,75,3
		1105,"Subject 8",4,"0108",2016-07-15 13:01:53,107.9091,82.3253,0.5,0.763,0.01,7.99,NA,NA,2118,231,NA,NA,0,2016-07-15 13:00:00,2016-07-15,76,3
		1106,"Subject 8",4,"0108",2016-07-15 13:29:53,102.5758,78.4356,0.5,0.765,0,7.99,NA,NA,2327,162,NA,NA,0,2016-07-15 13:00:00,2016-07-15,76,3
		1107,"Subject 8",4,"0108",2016-07-15 13:57:53,100.7713,76.5509,0.5,0.76,0,7.99,NA,NA,336,54,NA,NA,0,2016-07-15 13:00:00,2016-07-15,76,3
		1108,"Subject 8",4,"0108",2016-07-15 14:25:53,112.0394,88.9017,0.5,0.793,0,7.99,NA,NA,3305,122,NA,NA,0,2016-07-15 14:00:00,2016-07-15,77,3
		1109,"Subject 8",4,"0108",2016-07-15 14:53:53,99.0069,76.1499,0.5,0.769,0,7.99,NA,NA,646,34,NA,NA,0,2016-07-15 14:00:00,2016-07-15,77,3
		1110,"Subject 8",4,"0108",2016-07-15 15:21:53,93.1924,71.2176,0.4,0.764,0,7.99,NA,NA,196,31,NA,NA,0,2016-07-15 15:00:00,2016-07-15,78,3
		1111,"Subject 8",4,"0108",2016-07-15 15:49:53,119.6584,94.0345,0.6,0.786,0.08,8.07,NA,NA,2800,468,NA,NA,0,2016-07-15 15:00:00,2016-07-15,78,3
		1112,"Subject 8",4,"0108",2016-07-15 16:17:53,97.9643,78.195,0.5,0.798,0,8.07,NA,NA,473,18,NA,NA,0,2016-07-15 16:00:00,2016-07-15,79,3
		1113,"Subject 8",4,"0108",2016-07-15 16:45:53,100.8114,84.4105,0.5,0.837,0.01,8.08,NA,NA,6518,177,NA,NA,0,2016-07-15 16:00:00,2016-07-15,79,3
		1114,"Subject 8",4,"0108",2016-07-15 17:13:53,103.458,79.398,0.5,0.768,-0.01,8.07,NA,NA,3987,87,NA,NA,0,2016-07-15 17:00:00,2016-07-15,80,3
		1115,"Subject 8",4,"0108",2016-07-15 17:41:53,111.7587,95.1573,0.5,0.851,0.18,8.25,NA,NA,2309,273,NA,NA,0,2016-07-15 17:00:00,2016-07-15,80,3
		1116,"Subject 8",4,"0108",2016-07-15 18:09:53,131.3275,110.9968,0.6,0.845,0.02,8.27,NA,NA,3303,1059,NA,NA,0,2016-07-15 18:00:00,2016-07-15,81,3
		1117,"Subject 8",4,"0108",2016-07-15 18:37:53,133.3726,113.2424,0.6,0.849,0.18,8.45,NA,NA,4911,1871,NA,NA,0,2016-07-15 18:00:00,2016-07-15,81,3
		1118,"Subject 8",4,"0108",2016-07-15 19:05:53,126.2348,107.6685,0.6,0.853,0.14,8.59,NA,NA,1708,515,NA,NA,0,2016-07-15 19:00:00,2016-07-15,82,3
		1119,"Subject 8",4,"0108",2016-07-15 19:33:53,139.5881,117.9341,0.7,0.845,0.11,8.7,NA,NA,6136,2911,NA,NA,0,2016-07-15 19:00:00,2016-07-15,82,3
		1120,"Subject 8",4,"0108",2016-07-15 20:01:53,114.0845,89.3428,0.5,0.783,-0.01,8.69,NA,NA,2344,436,NA,NA,0,2016-07-15 20:00:00,2016-07-15,83,3
		1121,"Subject 8",4,"0108",2016-07-15 20:29:53,130.4453,111.879,0.6,0.858,0.15,8.84,NA,NA,3706,1257,NA,NA,0,2016-07-15 20:00:00,2016-07-15,83,3
		1122,"Subject 8",4,"0108",2016-07-15 20:57:53,104.5407,87.2576,0.5,0.835,0.04,8.88,NA,NA,650,63,NA,NA,0,2016-07-15 20:00:00,2016-07-15,83,3
		1123,"Subject 8",4,"0108",2016-07-15 21:25:53,107.468,88.4606,0.5,0.823,0.09,8.97,NA,NA,2508,307,NA,NA,0,2016-07-15 21:00:00,2016-07-15,84,3
		1124,"Subject 8",4,"0108",2016-07-15 21:53:53,90.626,76.6311,0.4,0.845,0.2,9.17,NA,NA,1939,223,NA,NA,0,2016-07-15 21:00:00,2016-07-15,84,3
		1125,"Subject 8",4,"0108",2016-07-15 22:21:53,99.0871,84.1699,0.5,0.849,0,9.17,NA,NA,1961,71,NA,NA,0,2016-07-15 22:00:00,2016-07-15,85,3
		1126,"Subject 8",4,"0108",2016-07-15 22:49:53,136.4202,116.0093,0.7,0.85,0.15,9.32,NA,NA,3843,1860,NA,NA,0,2016-07-15 22:00:00,2016-07-15,85,3
		1127,"Subject 8",4,"0108",2016-07-15 23:17:53,121.6233,102.9768,0.6,0.847,0.08,9.4,NA,NA,5052,1902,NA,NA,0,2016-07-15 23:00:00,2016-07-15,86,3
		1128,"Subject 8",4,"0108",2016-07-15 23:45:53,126.1947,104.3803,0.6,0.827,0.14,9.54,NA,NA,1459,373,NA,NA,0,2016-07-15 23:00:00,2016-07-15,86,3
		1129,"Subject 8",4,"0108",2016-07-16 00:13:53,122.7461,104.9818,0.6,0.855,0.17,9.71,NA,NA,5416,2449,NA,NA,0,2016-07-16 00:00:00,2016-07-16,87,4
		1130,"Subject 8",4,"0108",2016-07-16 00:41:53,109.2725,87.4581,0.5,0.8,0.01,9.72,NA,NA,2317,302,NA,NA,0,2016-07-16 00:00:00,2016-07-16,87,4
		1131,"Subject 8",4,"0108",2016-07-16 01:09:53,96.7212,78.4757,0.5,0.811,0.01,9.73,NA,NA,3989,210,NA,NA,0,2016-07-16 01:00:00,2016-07-16,88,4
		1132,"Subject 8",4,"0108",2016-07-16 01:37:53,105.8239,89.7037,0.5,0.848,0.05,9.78,NA,NA,1469,166,NA,NA,0,2016-07-16 01:00:00,2016-07-16,88,4
		1133,"Subject 8",4,"0108",2016-07-16 02:05:53,107.3477,83.2075,0.5,0.775,0,9.78,NA,NA,716,48,NA,NA,0,2016-07-16 02:00:00,2016-07-16,89,4
		1134,"Subject 8",4,"0108",2016-07-16 02:33:53,95.3979,78.7564,0.5,0.826,0.07,9.85,NA,NA,1819,269,NA,NA,0,2016-07-16 02:00:00,2016-07-16,89,4
		1135,"Subject 8",4,"0108",2016-07-16 03:01:53,112.9216,89.9443,0.5,0.796,0.12,9.97,NA,NA,7383,181,NA,NA,0,2016-07-16 03:00:00,2016-07-16,90,4
		1136,"Subject 8",4,"0108",2016-07-16 03:29:53,98.0044,80.1599,0.5,0.818,0,9.97,NA,NA,4404,160,NA,NA,0,2016-07-16 03:00:00,2016-07-16,90,4
		1137,"Subject 8",4,"0108",2016-07-16 03:57:53,108.4705,87.2977,0.5,0.805,0.03,10,NA,NA,2865,295,NA,NA,0,2016-07-16 03:00:00,2016-07-16,90,4
		1138,"Subject 8",4,"0108",2016-07-16 04:25:53,131.528,110.5557,0.6,0.841,0.14,10.14,NA,NA,3771,1564,NA,NA,0,2016-07-16 04:00:00,2016-07-16,91,4
		1139,"Subject 8",4,"0108",2016-07-16 04:53:53,123.2674,101.7738,0.6,0.826,0.05,10.19,NA,NA,4500,1195,NA,NA,0,2016-07-16 04:00:00,2016-07-16,91,4
		1140,"Subject 8",4,"0108",2016-07-16 05:21:53,125.7536,100.9317,0.6,0.803,0.09,10.28,NA,NA,4923,517,NA,NA,0,2016-07-16 05:00:00,2016-07-16,92,4
		1141,"Subject 8",4,"0108",2016-07-16 05:49:53,118.0143,98.7262,0.6,0.836,0.07,10.35,NA,NA,6320,2956,NA,NA,0,2016-07-16 05:00:00,2016-07-16,92,4
		1142,"Subject 8",4,"0108",2016-07-16 06:17:53,102.0545,80.0797,0.5,0.785,-0.01,10.34,NA,NA,876,83,NA,NA,0,2016-07-16 06:00:00,2016-07-16,93,4
		1143,"Subject 8",4,"0108",2016-07-16 06:45:53,96.8014,79.8391,0.5,0.825,0.15,10.49,NA,NA,1223,169,NA,NA,0,2016-07-16 06:00:00,2016-07-16,93,4
		1144,"Subject 8",4,"0108",2016-07-16 07:13:53,93.6335,76.3103,0.5,0.815,0,10.49,NA,NA,618,21,NA,NA,0,2016-07-16 07:00:00,2016-07-16,94,4
		1145,"Subject 8",4,"0108",2016-07-16 07:41:53,123.3075,101.6936,0.6,0.825,0.01,10.5,NA,NA,2929,355,NA,NA,0,2016-07-16 07:00:00,2016-07-16,94,4
		1146,"Subject 8",4,"0108",2016-07-16 08:09:53,100.7312,79.3579,0.5,0.788,0.03,10.53,NA,NA,1574,337,NA,NA,0,2016-07-16 08:00:00,2016-07-16,95,4
		1147,"Subject 8",4,"0108",2016-07-16 08:37:53,98.5257,76.7514,0.5,0.779,0,10.53,NA,NA,240,63,NA,NA,0,2016-07-16 08:00:00,2016-07-16,95,4
		1148,"Subject 8",4,"0108",2016-07-16 09:05:53,94.7563,76.2301,0.5,0.804,0.05,10.58,NA,NA,814,114,NA,NA,0,2016-07-16 09:00:00,2016-07-16,96,4
		1149,"Subject 8",4,"0108",2016-07-16 09:33:53,101.9743,80.0797,0.5,0.785,0,10.58,NA,NA,1693,224,NA,NA,0,2016-07-16 09:00:00,2016-07-16,96,4
		1150,"Subject 8",4,"0108",2016-07-16 10:01:53,98.9267,76.2702,0.5,0.771,0,10.58,NA,NA,1047,62,NA,NA,0,2016-07-16 10:00:00,2016-07-16,97,4
		1151,"Subject 8",4,"0108",2016-07-16 10:29:53,103.8991,85.6536,0.5,0.824,0.07,10.65,NA,NA,1344,199,NA,NA,0,2016-07-16 10:00:00,2016-07-16,97,4
		1152,"Subject 8",4,"0108",2016-07-16 10:57:53,99.6886,78.195,0.5,0.785,0,10.65,NA,NA,2794,122,NA,NA,0,2016-07-16 10:00:00,2016-07-16,97,4
		1153,"Subject 8",4,"0108",2016-07-16 11:25:53,99.1673,77.7539,0.5,0.784,0,10.65,NA,NA,862,59,NA,NA,0,2016-07-16 11:00:00,2016-07-16,98,4
		1154,"Subject 8",4,"0108",2016-07-16 11:53:53,93.433,74.7464,0.4,0.8,0,10.65,NA,NA,247,40,NA,NA,0,2016-07-16 11:00:00,2016-07-16,98,4
		1155,"Subject 8",4,"0108",2016-07-16 12:21:53,128.6007,97.2024,0.6,0.756,0,10.65,NA,NA,2899,506,NA,NA,0,2016-07-16 12:00:00,2016-07-16,99,4
		1156,"Subject 8",4,"0108",2016-07-16 12:49:53,110.0344,85.6135,0.5,0.778,0.01,10.66,NA,NA,1764,422,NA,NA,0,2016-07-16 12:00:00,2016-07-16,99,4
		1157,"Subject 8",4,"0108",2016-07-16 13:17:53,98.8465,76.1098,0.5,0.77,0,10.66,NA,NA,321,98,NA,NA,0,2016-07-16 13:00:00,2016-07-16,100,4
		1158,"Subject 8",4,"0108",2016-07-16 13:45:53,99.3277,76.7915,0.5,0.773,-0.01,10.65,NA,NA,322,51,NA,NA,0,2016-07-16 13:00:00,2016-07-16,100,4
		1159,"Subject 8",4,"0108",2016-07-16 14:13:53,122.1446,96.5608,0.6,0.791,0.01,10.66,NA,NA,1928,368,NA,NA,0,2016-07-16 14:00:00,2016-07-16,101,4
		1160,"Subject 8",4,"0108",2016-07-16 14:41:53,97.2024,74.4657,0.5,0.766,0.01,10.67,NA,NA,1725,517,NA,NA,0,2016-07-16 14:00:00,2016-07-16,101,4
		1161,"Subject 8",4,"0108",2016-07-16 15:09:53,93.5533,72.7013,0.4,0.777,0,10.67,NA,NA,423,26,NA,NA,0,2016-07-16 15:00:00,2016-07-16,102,4
		1162,"Subject 8",4,"0108",2016-07-16 15:37:53,100.0495,81.5233,0.5,0.815,0.02,10.69,NA,NA,748,110,NA,NA,0,2016-07-16 15:00:00,2016-07-16,102,4
		1163,"Subject 8",4,"0108",2016-07-16 16:05:53,101.3327,77.7138,0.5,0.767,0,10.69,NA,NA,1355,192,NA,NA,0,2016-07-16 16:00:00,2016-07-16,103,4
		1164,"Subject 8",4,"0108",2016-07-16 16:33:53,88.4606,68.571,0.4,0.775,0,10.69,NA,NA,530,48,NA,NA,0,2016-07-16 16:00:00,2016-07-16,103,4
		1165,"Subject 8",4,"0108",2016-07-16 17:01:53,102.0946,88.0195,0.5,0.862,0.11,10.8,NA,NA,1193,187,NA,NA,0,2016-07-16 17:00:00,2016-07-16,104,4
		1166,"Subject 8",4,"0108",2016-07-16 17:29:53,102.7763,80.7614,0.5,0.786,0.01,10.81,NA,NA,1232,198,NA,NA,0,2016-07-16 17:00:00,2016-07-16,104,4
		1167,"Subject 8",4,"0108",2016-07-16 17:57:53,124.9115,103.859,0.6,0.831,0.07,10.88,NA,NA,3556,1089,NA,NA,0,2016-07-16 17:00:00,2016-07-16,104,4
		1168,"Subject 8",4,"0108",2016-07-16 18:25:53,133.3325,104.5407,0.6,0.784,0.08,10.96,NA,NA,3560,737,NA,NA,0,2016-07-16 18:00:00,2016-07-16,105,4
		1169,"Subject 8",4,"0108",2016-07-16 18:53:53,134.8964,112.2399,0.7,0.832,0.09,11.05,NA,NA,6017,2898,NA,NA,0,2016-07-16 18:00:00,2016-07-16,105,4
		1170,"Subject 8",4,"0108",2016-07-16 19:21:53,121.9842,94.9568,0.6,0.778,0.21,11.26,NA,NA,2059,393,NA,NA,0,2016-07-16 19:00:00,2016-07-16,106,4
		1171,"Subject 8",4,"0108",2016-07-16 19:49:53,134.7761,115.1672,0.7,0.854,0.1,11.36,NA,NA,5565,2419,NA,NA,0,2016-07-16 19:00:00,2016-07-16,106,4
		1172,"Subject 8",4,"0108",2016-07-16 20:17:53,107.468,85.9744,0.5,0.8,0.11,11.47,NA,NA,1281,199,NA,NA,0,2016-07-16 20:00:00,2016-07-16,107,4
		1173,"Subject 8",4,"0108",2016-07-16 20:45:53,103.3377,84.6912,0.5,0.82,0,11.47,NA,NA,2342,208,NA,NA,0,2016-07-16 20:00:00,2016-07-16,107,4
		1174,"Subject 8",4,"0108",2016-07-16 21:13:53,132.7711,114.8063,0.6,0.865,0.13,11.6,NA,NA,3807,1607,NA,NA,0,2016-07-16 21:00:00,2016-07-16,108,4
		1175,"Subject 8",4,"0108",2016-07-16 21:41:53,104.9417,84.21,0.5,0.802,0,11.6,NA,NA,2321,379,NA,NA,0,2016-07-16 21:00:00,2016-07-16,108,4
		1176,"Subject 8",4,"0108",2016-07-16 22:09:53,120.1396,101.9743,0.6,0.849,0.22,11.82,NA,NA,1781,682,NA,NA,0,2016-07-16 22:00:00,2016-07-16,109,4
		1177,"Subject 8",4,"0108",2016-07-16 22:37:53,107.3878,89.423,0.5,0.833,0.01,11.83,NA,NA,1916,457,NA,NA,0,2016-07-16 22:00:00,2016-07-16,109,4
		1178,"Subject 8",4,"0108",2016-07-16 23:05:53,109.8339,92.5107,0.5,0.842,0.08,11.91,NA,NA,1415,209,NA,NA,0,2016-07-16 23:00:00,2016-07-16,110,4
		1179,"Subject 8",4,"0108",2016-07-16 23:33:53,105.6635,88.2601,0.5,0.835,0.05,11.96,NA,NA,2156,247,NA,NA,0,2016-07-16 23:00:00,2016-07-16,110,4
		1180,"Subject 8",4,"0108",2016-07-17 00:01:53,130.4453,107.468,0.6,0.824,0.15,12.11,NA,NA,2836,613,NA,NA,0,2016-07-17 00:00:00,2016-07-17,111,5
		1181,"Subject 8",4,"0108",2016-07-17 00:29:53,126.2348,106.9066,0.6,0.847,0.09,12.2,NA,NA,6289,3163,NA,NA,0,2016-07-17 00:00:00,2016-07-17,111,5
		1182,"Subject 8",4,"0108",2016-07-17 00:57:53,108.2299,85.5333,0.5,0.79,0,12.2,NA,NA,3241,515,NA,NA,0,2016-07-17 00:00:00,2016-07-17,111,5
		1183,"Subject 8",4,"0108",2016-07-17 01:25:53,98.0445,78.9569,0.5,0.805,0.08,12.28,NA,NA,385,110,NA,NA,0,2016-07-17 01:00:00,2016-07-17,112,5
		1184,"Subject 8",4,"0108",2016-07-17 01:53:53,110.8364,87.017,0.5,0.785,0,12.28,NA,NA,880,70,NA,NA,0,2016-07-17 01:00:00,2016-07-17,112,5
		1185,"Subject 8",4,"0108",2016-07-17 02:21:53,107.7487,89.0621,0.5,0.827,0.12,12.4,NA,NA,697,114,NA,NA,0,2016-07-17 02:00:00,2016-07-17,113,5
		1186,"Subject 8",4,"0108",2016-07-17 02:49:53,95.5984,80.7213,0.5,0.844,0.06,12.46,NA,NA,755,83,NA,NA,0,2016-07-17 02:00:00,2016-07-17,113,5
		1187,"Subject 8",4,"0108",2016-07-17 03:17:53,109.7136,92.9919,0.5,0.848,0.14,12.6,NA,NA,1550,232,NA,NA,0,2016-07-17 03:00:00,2016-07-17,114,5
		1188,"Subject 8",4,"0108",2016-07-17 03:45:53,102.4555,83.2877,0.5,0.813,0,12.6,NA,NA,2106,350,NA,NA,0,2016-07-17 03:00:00,2016-07-17,114,5
		1189,"Subject 8",4,"0108",2016-07-17 04:13:53,110.3953,90.9869,0.5,0.824,0,12.6,NA,NA,1421,154,NA,NA,0,2016-07-17 04:00:00,2016-07-17,115,5
		1190,"Subject 8",4,"0108",2016-07-17 04:41:53,137.8638,118.9767,0.7,0.863,0.15,12.75,NA,NA,5299,2367,NA,NA,0,2016-07-17 04:00:00,2016-07-17,115,5
		1191,"Subject 8",4,"0108",2016-07-17 05:09:53,94.9969,74.7063,0.5,0.786,0.01,12.76,NA,NA,2804,630,NA,NA,0,2016-07-17 05:00:00,2016-07-17,116,5
		1192,"Subject 8",4,"0108",2016-07-17 05:37:53,110.3151,87.3378,0.5,0.792,0.11,12.87,NA,NA,1638,117,NA,NA,0,2016-07-17 05:00:00,2016-07-17,116,5
		1193,"Subject 8",4,"0108",2016-07-17 06:05:53,109.5933,90.9468,0.5,0.83,0.07,12.94,NA,NA,4026,1389,NA,NA,0,2016-07-17 06:00:00,2016-07-17,117,5
		1194,"Subject 8",4,"0108",2016-07-17 06:33:53,96.1598,76.4707,0.5,0.795,0.01,12.95,NA,NA,1051,117,NA,NA,0,2016-07-17 06:00:00,2016-07-17,117,5
		1195,"Subject 8",4,"0108",2016-07-17 07:01:53,96.8014,80.6812,0.5,0.834,0.08,13.03,NA,NA,884,123,NA,NA,0,2016-07-17 07:00:00,2016-07-17,118,5
		1196,"Subject 8",4,"0108",2016-07-17 07:29:53,88.3804,71.2176,0.4,0.806,0.01,13.04,NA,NA,509,33,NA,NA,0,2016-07-17 07:00:00,2016-07-17,118,5
		1197,"Subject 8",4,"0108",2016-07-17 07:57:53,97.443,81.2827,0.5,0.834,0.01,13.05,NA,NA,2407,611,NA,NA,0,2016-07-17 07:00:00,2016-07-17,118,5
		1198,"Subject 8",4,"0108",2016-07-17 08:25:53,93.0721,72.9018,0.4,0.783,0,13.05,NA,NA,917,88,NA,NA,0,2016-07-17 08:00:00,2016-07-17,119,5
		1199,"Subject 8",4,"0108",2016-07-17 08:53:53,95.1573,73.8642,0.5,0.776,0.01,13.06,NA,NA,1276,32,NA,NA,0,2016-07-17 08:00:00,2016-07-17,119,5
		1200,"Subject 8",4,"0108",2016-07-17 09:21:53,94.7964,80.3203,0.5,0.847,0.09,13.15,NA,NA,1171,121,NA,NA,0,2016-07-17 09:00:00,2016-07-17,120,5
		1201,"Subject 8",4,"0108",2016-07-17 09:49:53,99.1272,81.8842,0.5,0.826,0.05,13.2,NA,NA,1010,95,NA,NA,0,2016-07-17 09:00:00,2016-07-17,120,5
		1202,"Subject 8",4,"0108",2016-07-17 10:17:53,92.631,77.794,0.4,0.84,-0.01,13.19,NA,NA,104,19,NA,NA,0,2016-07-17 10:00:00,2016-07-17,121,5
		1203,"Subject 8",4,"0108",2016-07-17 10:45:53,84.0496,68.8918,0.4,0.819,0.01,13.2,NA,NA,1255,64,NA,NA,0,2016-07-17 10:00:00,2016-07-17,121,5
		1204,"Subject 8",4,"0108",2016-07-17 11:13:53,98.3653,77.5935,0.5,0.789,0,13.2,NA,NA,1458,101,NA,NA,0,2016-07-17 11:00:00,2016-07-17,122,5
		1205,"Subject 8",4,"0108",2016-07-17 11:41:53,42.7867,34.7667,0.2,0.812,0,13.2,NA,NA,685,270,NA,NA,0,2016-07-17 11:00:00,2016-07-17,122,5
		1206,"Subject 8",4,"0108",2016-07-17 12:09:53,97.2826,73.5033,0.5,0.756,0,13.2,NA,NA,350,33,NA,NA,0,2016-07-17 12:00:00,2016-07-17,123,5
		1207,"Subject 8",4,"0108",2016-07-17 12:37:53,93.1523,72.7815,0.4,0.782,0,13.2,NA,NA,713,88,NA,NA,0,2016-07-17 12:00:00,2016-07-17,123,5
		1208,"Subject 8",4,"0108",2016-07-17 13:05:53,96.8014,77.3529,0.5,0.799,0.01,13.21,NA,NA,456,160,NA,NA,0,2016-07-17 13:00:00,2016-07-17,124,5
		1209,"Subject 8",4,"0108",2016-07-17 13:33:53,92.9518,74.0647,0.4,0.797,-0.01,13.2,NA,NA,371,94,NA,NA,0,2016-07-17 13:00:00,2016-07-17,124,5
		1210,"Subject 8",4,"0108",2016-07-17 14:01:53,85.8942,69.2527,0.4,0.806,0.01,13.21,NA,NA,576,83,NA,NA,0,2016-07-17 14:00:00,2016-07-17,125,5
		1211,"Subject 8",4,"0108",2016-07-17 14:29:53,90.626,73.383,0.4,0.81,0,13.21,NA,NA,737,52,NA,NA,0,2016-07-17 14:00:00,2016-07-17,125,5
		1212,"Subject 8",4,"0108",2016-07-17 14:57:53,93.5132,73.0622,0.4,0.781,0,13.21,NA,NA,1178,101,NA,NA,0,2016-07-17 14:00:00,2016-07-17,125,5
		1213,"Subject 8",4,"0108",2016-07-17 15:25:53,86.0145,66.3254,0.4,0.771,0.01,13.22,NA,NA,1010,82,NA,NA,0,2016-07-17 15:00:00,2016-07-17,126,5
		1214,"Subject 8",4,"0108",2016-07-17 15:53:53,88.3804,68.8116,0.4,0.779,-0.01,13.21,NA,NA,629,59,NA,NA,0,2016-07-17 15:00:00,2016-07-17,126,5
		1215,"Subject 8",4,"0108",2016-07-17 16:21:53,82.3654,63.9595,0.4,0.777,0.01,13.22,NA,NA,2898,107,NA,NA,0,2016-07-17 16:00:00,2016-07-17,127,5
		1216,"Subject 8",4,"0108",2016-07-17 16:49:53,81.3228,64.7615,0.4,0.796,-0.01,13.21,NA,NA,387,54,NA,NA,0,2016-07-17 16:00:00,2016-07-17,127,5
		1217,"Subject 8",4,"0108",2016-07-17 17:17:53,83.1273,65.7239,0.4,0.791,0.01,13.22,NA,NA,1123,109,NA,NA,0,2016-07-17 17:00:00,2016-07-17,128,5
		1218,"Subject 8",4,"0108",2016-07-17 17:45:53,94.1147,73.4231,0.4,0.78,-0.01,13.21,NA,NA,2213,172,NA,NA,0,2016-07-17 17:00:00,2016-07-17,128,5
		1219,"Subject 8",4,"0108",2016-07-17 18:13:53,91.5884,71.8191,0.4,0.784,0.01,13.22,NA,NA,1956,621,NA,NA,0,2016-07-17 18:00:00,2016-07-17,129,5
		1220,"Subject 8",4,"0108",2016-07-17 18:41:53,98.245,75.2677,0.5,0.766,0.01,13.23,NA,NA,825,152,NA,NA,0,2016-07-17 18:00:00,2016-07-17,129,5
		1221,"Subject 8",4,"0108",2016-07-17 19:09:53,95.7989,75.2677,0.5,0.786,0.01,13.24,NA,NA,837,236,NA,NA,0,2016-07-17 19:00:00,2016-07-17,130,5
		1222,"Subject 8",4,"0108",2016-07-17 19:37:53,132.5706,102.6961,0.6,0.775,0.07,13.31,NA,NA,4690,2227,NA,NA,0,2016-07-17 19:00:00,2016-07-17,130,5
		1223,"Subject 8",4,"0108",2016-07-17 20:05:53,97.9242,75.9494,0.5,0.776,0,13.31,NA,NA,2364,269,NA,NA,0,2016-07-17 20:00:00,2016-07-17,131,5
		1224,"Subject 8",4,"0108",2016-07-17 20:33:53,114.8063,89.9042,0.5,0.783,0.05,13.36,NA,NA,2861,1111,NA,NA,0,2016-07-17 20:00:00,2016-07-17,131,5
		1225,"Subject 8",4,"0108",2016-07-17 21:01:53,87.6185,69.5334,0.4,0.794,0.04,13.4,NA,NA,1088,269,NA,NA,0,2016-07-17 21:00:00,2016-07-17,132,5
		1226,"Subject 8",4,"0108",2016-07-17 21:29:53,137.1019,114.1647,0.7,0.833,0.09,13.49,NA,NA,3437,1427,NA,NA,0,2016-07-17 21:00:00,2016-07-17,132,5
		1227,"Subject 8",4,"0108",2016-07-17 21:57:53,115.1271,90.1448,0.6,0.783,0.02,13.51,NA,NA,3939,1215,NA,NA,0,2016-07-17 21:00:00,2016-07-17,132,5
		1228,"Subject 8",4,"0108",2016-07-17 22:25:53,118.3351,92.23,0.6,0.779,-0.01,13.5,NA,NA,4018,986,NA,NA,0,2016-07-17 22:00:00,2016-07-17,133,5
		1229,"Subject 8",4,"0108",2016-07-17 22:53:53,88.2601,69.373,0.4,0.786,0.04,13.54,NA,NA,451,53,NA,NA,0,2016-07-17 22:00:00,2016-07-17,133,5
		1230,"Subject 8",4,"0108",2016-07-17 23:21:53,114.8865,93.5132,0.6,0.814,0.07,13.61,NA,NA,1614,558,NA,NA,0,2016-07-17 23:00:00,2016-07-17,134,5
		1231,"Subject 8",4,"0108",2016-07-17 23:49:53,98.9267,76.19,0.5,0.77,0,13.61,NA,NA,2201,602,NA,NA,0,2016-07-17 23:00:00,2016-07-17,134,5
		1232,"Subject 8",4,"0108",2016-07-18 00:17:53,101.1322,81.2426,0.5,0.803,0.04,13.65,NA,NA,1847,64,NA,NA,0,2016-07-18 00:00:00,2016-07-18,135,6
		1233,"Subject 8",4,"0108",2016-07-18 00:45:53,99.7688,80.5609,0.5,0.807,0.07,13.72,NA,NA,1312,302,NA,NA,0,2016-07-18 00:00:00,2016-07-18,135,6
		1234,"Subject 8",4,"0108",2016-07-18 01:13:53,102.9367,84.4105,0.5,0.82,0.1,13.82,NA,NA,2167,304,NA,NA,0,2016-07-18 01:00:00,2016-07-18,136,6
		1235,"Subject 8",4,"0108",2016-07-18 01:41:53,120.6208,99.8089,0.6,0.827,0.1,13.92,NA,NA,3531,1136,NA,NA,0,2016-07-18 01:00:00,2016-07-18,136,6
		1236,"Subject 8",4,"0108",2016-07-18 02:09:53,97.8841,77.5534,0.5,0.792,-0.02,13.9,NA,NA,3774,496,NA,NA,0,2016-07-18 02:00:00,2016-07-18,137,6
		1237,"Subject 8",4,"0108",2016-07-18 02:37:53,86.0145,67.1675,0.4,0.781,0.02,13.92,NA,NA,1331,54,NA,NA,0,2016-07-18 02:00:00,2016-07-18,137,6
		1238,"Subject 8",4,"0108",2016-07-18 03:05:53,91.428,70.4557,0.4,0.77,0,13.92,NA,NA,920,170,NA,NA,0,2016-07-18 03:00:00,2016-07-18,138,6
		1239,"Subject 8",4,"0108",2016-07-18 03:33:53,106.3853,83.5283,0.5,0.785,0.07,13.99,NA,NA,2055,503,NA,NA,0,2016-07-18 03:00:00,2016-07-18,138,6
		1240,"Subject 8",4,"0108",2016-07-18 04:01:53,95.5984,75.7088,0.5,0.792,0,13.99,NA,NA,1063,143,NA,NA,0,2016-07-18 04:00:00,2016-07-18,139,6
		1241,"Subject 8",4,"0108",2016-07-18 04:29:53,92.23,72.6211,0.4,0.788,0,13.99,NA,NA,2002,242,NA,NA,0,2016-07-18 04:00:00,2016-07-18,139,6
		1242,"Subject 8",4,"0108",2016-07-18 04:57:53,135.2172,112.6409,0.7,0.833,0.18,14.17,NA,NA,3854,1702,NA,NA,0,2016-07-18 04:00:00,2016-07-18,139,6
		1243,"Subject 8",4,"0108",2016-07-18 05:25:53,111.5181,88.7012,0.5,0.795,0.05,14.22,NA,NA,4338,1741,NA,NA,0,2016-07-18 05:00:00,2016-07-18,140,6
		1244,"Subject 8",4,"0108",2016-07-18 05:53:53,89.2225,67.8893,0.4,0.761,0.01,14.23,NA,NA,1171,72,NA,NA,0,2016-07-18 05:00:00,2016-07-18,140,6
		1245,"Subject 8",4,"0108",2016-07-18 06:21:53,97.4831,75.4281,0.5,0.774,0.05,14.28,NA,NA,669,64,NA,NA,0,2016-07-18 06:00:00,2016-07-18,141,6
		1246,"Subject 8",4,"0108",2016-07-18 06:49:53,107.0269,85.4932,0.5,0.799,0.02,14.3,NA,NA,2672,478,NA,NA,0,2016-07-18 06:00:00,2016-07-18,141,6
		1247,"Subject 8",4,"0108",2016-07-18 07:17:53,90.3453,71.2176,0.4,0.788,0.06,14.36,NA,NA,319,41,NA,NA,0,2016-07-18 07:00:00,2016-07-18,142,6
		1248,"Subject 8",4,"0108",2016-07-18 07:45:53,81.7639,68.5309,0.4,0.838,0.03,14.39,NA,NA,1109,183,NA,NA,0,2016-07-18 07:00:00,2016-07-18,142,6
		1249,"Subject 8",4,"0108",2016-07-18 08:13:53,80.7213,65.4432,0.4,0.811,0.01,14.4,NA,NA,509,28,NA,NA,0,2016-07-18 08:00:00,2016-07-18,143,6
		1250,"Subject 8",4,"0108",2016-07-18 08:41:53,86.8967,68.8918,0.4,0.793,0,14.4,NA,NA,211,39,NA,NA,0,2016-07-18 08:00:00,2016-07-18,143,6
		1251,"Subject 8",4,"0108",2016-07-18 09:09:53,88.0997,69.8141,0.4,0.792,0.02,14.42,NA,NA,4428,59,NA,NA,0,2016-07-18 09:00:00,2016-07-18,144,6
		1252,"Subject 8",4,"0108",2016-07-18 09:37:53,101.3728,82.9268,0.5,0.818,0.07,14.49,NA,NA,2936,207,NA,NA,0,2016-07-18 09:00:00,2016-07-18,144,6
		1253,"Subject 8",4,"0108",2016-07-18 10:05:53,98.5257,78.3554,0.5,0.795,0,14.49,NA,NA,3634,70,NA,NA,0,2016-07-18 10:00:00,2016-07-18,145,6
		1254,"Subject 8",4,"0108",2016-07-18 10:33:53,117.8539,94.9167,0.6,0.805,0,14.49,NA,NA,2587,414,NA,NA,0,2016-07-18 10:00:00,2016-07-18,145,6
		1255,"Subject 8",4,"0108",NA,0,0,0,0,0,0,NA,NA,0,0,NA,NA,0,NA,NA,NA,NA
		1256,"Subject 8",4,NA,NA,NA,NA,NA,NA,NA,NA,NA,NA,NA,NA,NA,NA,NA,NA,NA,NA,NA
		1257,"Subject 9",5,"0109",2016-07-12 09:27:53,170.607,130.8915,0.8,0.767,-0.02,-0.02,NA,NA,4436,2049,NA,NA,0,2016-07-12 09:00:00,2016-07-12,0,0
		1258,"Subject 9",5,"0109",2016-07-12 09:55:53,138.5475,103.617,0.7,0.748,0.01,-0.01,NA,NA,4237,1630,NA,NA,0,2016-07-12 09:00:00,2016-07-12,0,0
		1259,"Subject 9",5,"0109",2016-07-12 10:23:53,131.544,96.744,0.6,0.736,0.09,0.08,NA,NA,3752,1134,NA,NA,0,2016-07-12 10:00:00,2016-07-12,1,0
		1260,"Subject 9",5,"0109",2016-07-12 10:51:53,131.196,101.529,0.6,0.774,-0.02,0.06,NA,NA,3899,1303,NA,NA,0,2016-07-12 10:00:00,2016-07-12,1,0
		1261,"Subject 9",5,"0109",2016-07-12 11:19:53,104.9655,77.8215,0.5,0.741,-0.03,0.03,NA,NA,1882,295,NA,NA,0,2016-07-12 11:00:00,2016-07-12,2,0
		1262,"Subject 9",5,"0109",2016-07-12 11:47:53,137.286,104.6175,0.7,0.762,0.07,0.1,NA,NA,4534,2145,NA,NA,0,2016-07-12 11:00:00,2016-07-12,2,0
		1263,"Subject 9",5,"0109",2016-07-12 12:15:53,119.277,93.264,0.6,0.782,0.01,0.11,NA,NA,3479,1090,NA,NA,0,2016-07-12 12:00:00,2016-07-12,3,0
		1264,"Subject 9",5,"0109",2016-07-12 12:43:53,126.15,95.5695,0.6,0.758,-0.01,0.1,NA,NA,3331,1146,NA,NA,0,2016-07-12 12:00:00,2016-07-12,3,0
		1265,"Subject 9",5,"0109",2016-07-12 13:11:53,99.615,74.5155,0.5,0.748,0,0.1,NA,NA,1794,234,NA,NA,0,2016-07-12 13:00:00,2016-07-12,4,0
		1266,"Subject 9",5,"0109",2016-07-12 13:39:53,125.715,97.1355,0.6,0.773,0.08,0.18,NA,NA,3502,1090,NA,NA,0,2016-07-12 13:00:00,2016-07-12,4,0
		1267,"Subject 9",5,"0109",2016-07-12 14:07:53,107.0535,81.3015,0.5,0.759,-0.01,0.17,NA,NA,1519,250,NA,NA,0,2016-07-12 14:00:00,2016-07-12,5,0
		1268,"Subject 9",5,"0109",2016-07-12 14:35:53,99.6585,75.603,0.5,0.759,0.02,0.19,NA,NA,570,44,NA,NA,0,2016-07-12 14:00:00,2016-07-12,5,0
		1269,"Subject 9",5,"0109",2016-07-12 15:03:53,122.757,97.44,0.6,0.794,0.02,0.21,NA,NA,2076,659,NA,NA,0,2016-07-12 15:00:00,2016-07-12,6,0
		1270,"Subject 9",5,"0109",2016-07-12 15:31:53,122.1915,94.83,0.6,0.776,0,0.21,NA,NA,2460,673,NA,NA,0,2016-07-12 15:00:00,2016-07-12,6,0
		1271,"Subject 9",5,"0109",2016-07-12 15:59:53,101.877,76.299,0.5,0.749,-0.01,0.2,NA,NA,1117,40,NA,NA,0,2016-07-12 15:00:00,2016-07-12,6,0
		1272,"Subject 9",5,"0109",2016-07-12 16:27:53,103.791,78.3435,0.5,0.755,-0.01,0.19,NA,NA,1505,34,NA,NA,0,2016-07-12 16:00:00,2016-07-12,7,0
		1273,"Subject 9",5,"0109",2016-07-12 16:55:53,127.107,100.659,0.6,0.792,0.01,0.2,NA,NA,2225,510,NA,NA,0,2016-07-12 16:00:00,2016-07-12,7,0
		1274,"Subject 9",5,"0109",2016-07-12 17:23:53,109.446,85.8255,0.5,0.784,0.11,0.31,NA,NA,2431,639,NA,NA,0,2016-07-12 17:00:00,2016-07-12,8,0
		1275,"Subject 9",5,"0109",2016-07-12 17:51:53,107.358,83.3025,0.5,0.776,-0.01,0.3,NA,NA,590,36,NA,NA,0,2016-07-12 17:00:00,2016-07-12,8,0
		1276,"Subject 9",5,"0109",2016-07-12 18:19:53,139.113,110.0985,0.7,0.791,0,0.3,NA,NA,2737,1105,NA,NA,0,2016-07-12 18:00:00,2016-07-12,9,0
		1277,"Subject 9",5,"0109",2016-07-12 18:47:53,124.5405,101.3115,0.6,0.814,0.07,0.37,NA,NA,3920,1087,NA,NA,0,2016-07-12 18:00:00,2016-07-12,9,0
		1278,"Subject 9",5,"0109",2016-07-12 19:15:53,119.1465,89.2185,0.6,0.749,0,0.37,NA,NA,991,260,NA,NA,0,2016-07-12 19:00:00,2016-07-12,10,0
		1279,"Subject 9",5,"0109",2016-07-12 19:43:53,144.855,116.145,0.7,0.802,0.13,0.5,NA,NA,4986,2153,NA,NA,0,2016-07-12 19:00:00,2016-07-12,10,0
		1280,"Subject 9",5,"0109",2016-07-12 20:11:53,113.535,84.9555,0.5,0.749,-0.01,0.49,NA,NA,1476,226,NA,NA,0,2016-07-12 20:00:00,2016-07-12,11,0
		1281,"Subject 9",5,"0109",2016-07-12 20:39:53,144.768,110.9685,0.7,0.766,0.08,0.57,NA,NA,3635,1200,NA,NA,0,2016-07-12 20:00:00,2016-07-12,11,0
		1282,"Subject 9",5,"0109",2016-07-12 21:07:53,129.195,100.833,0.6,0.78,-0.01,0.56,NA,NA,5041,1999,NA,NA,0,2016-07-12 21:00:00,2016-07-12,12,0
		1283,"Subject 9",5,"0109",2016-07-12 21:35:53,154.425,117.102,0.7,0.758,0.04,0.6,NA,NA,3098,1361,NA,NA,0,2016-07-12 21:00:00,2016-07-12,12,0
		1284,"Subject 9",5,"0109",2016-07-12 22:03:53,112.665,83.259,0.5,0.739,0.03,0.63,NA,NA,2904,501,NA,NA,0,2016-07-12 22:00:00,2016-07-12,13,0
		1285,"Subject 9",5,"0109",2016-07-12 22:31:53,145.0725,110.403,0.7,0.761,0.03,0.66,NA,NA,1673,689,NA,NA,0,2016-07-12 22:00:00,2016-07-12,13,0
		1286,"Subject 9",5,"0109",2016-07-12 22:59:53,154.0335,123.888,0.7,0.804,0.15,0.81,NA,NA,5118,2117,NA,NA,0,2016-07-12 22:00:00,2016-07-12,13,0
		1287,"Subject 9",5,"0109",2016-07-12 23:27:53,111.7515,83.8245,0.5,0.75,0.01,0.82,NA,NA,2976,793,NA,NA,0,2016-07-12 23:00:00,2016-07-12,14,0
		1288,"Subject 9",5,"0109",2016-07-12 23:55:53,121.3215,91.6545,0.6,0.755,0,0.82,NA,NA,1096,132,NA,NA,0,2016-07-12 23:00:00,2016-07-12,14,0
		1289,"Subject 9",5,"0109",2016-07-13 00:23:53,107.445,79.083,0.5,0.736,0.05,0.87,NA,NA,1976,389,NA,NA,0,2016-07-13 00:00:00,2016-07-13,15,1
		1290,"Subject 9",5,"0109",2016-07-13 00:51:53,103.965,76.5165,0.5,0.736,0,0.87,NA,NA,1517,354,NA,NA,0,2016-07-13 00:00:00,2016-07-13,15,1
		1291,"Subject 9",5,"0109",2016-07-13 01:19:53,135.024,102.66,0.6,0.76,0.17,1.04,NA,NA,1152,156,NA,NA,0,2016-07-13 01:00:00,2016-07-13,16,1
		1292,"Subject 9",5,"0109",2016-07-13 01:47:53,109.0545,87.348,0.5,0.801,0,1.04,NA,NA,1894,285,NA,NA,0,2016-07-13 01:00:00,2016-07-13,16,1
		1293,"Subject 9",5,"0109",2016-07-13 02:15:53,116.7105,90.4365,0.6,0.775,0,1.04,NA,NA,1509,35,NA,NA,0,2016-07-13 02:00:00,2016-07-13,17,1
		1294,"Subject 9",5,"0109",2016-07-13 02:43:53,108.0975,84.0855,0.5,0.778,0.05,1.09,NA,NA,780,108,NA,NA,0,2016-07-13 02:00:00,2016-07-13,17,1
		1295,"Subject 9",5,"0109",2016-07-13 03:11:53,123.975,101.007,0.6,0.815,0.04,1.13,NA,NA,2274,329,NA,NA,0,2016-07-13 03:00:00,2016-07-13,18,1
		1296,"Subject 9",5,"0109",2016-07-13 03:39:53,111.1425,83.9115,0.5,0.755,-0.01,1.12,NA,NA,1064,25,NA,NA,0,2016-07-13 03:00:00,2016-07-13,18,1
		1297,"Subject 9",5,"0109",2016-07-13 04:07:53,126.0195,104.4,0.6,0.828,0.15,1.27,NA,NA,3746,1271,NA,NA,0,2016-07-13 04:00:00,2016-07-13,19,1
		1298,"Subject 9",5,"0109",2016-07-13 04:35:53,107.8365,82.911,0.5,0.769,0,1.27,NA,NA,576,17,NA,NA,0,2016-07-13 04:00:00,2016-07-13,19,1
		1299,"Subject 9",5,"0109",2016-07-13 05:03:53,145.2465,117.189,0.7,0.807,0.06,1.33,NA,NA,2956,1108,NA,NA,0,2016-07-13 05:00:00,2016-07-13,20,1
		1300,"Subject 9",5,"0109",2016-07-13 05:31:53,127.542,102.1815,0.6,0.801,0.2,1.53,NA,NA,3516,1178,NA,NA,0,2016-07-13 05:00:00,2016-07-13,20,1
		1301,"Subject 9",5,"0109",2016-07-13 05:59:53,111.2295,84.8685,0.5,0.763,0,1.53,NA,NA,1126,126,NA,NA,0,2016-07-13 05:00:00,2016-07-13,20,1
		1302,"Subject 9",5,"0109",2016-07-13 06:27:53,146.16,115.449,0.7,0.79,0.07,1.6,NA,NA,5804,2891,NA,NA,0,2016-07-13 06:00:00,2016-07-13,21,1
		1303,"Subject 9",5,"0109",2016-07-13 06:55:53,114.753,90.1755,0.5,0.786,0.01,1.61,NA,NA,4179,1438,NA,NA,0,2016-07-13 06:00:00,2016-07-13,21,1
		1304,"Subject 9",5,"0109",2016-07-13 07:23:53,122.844,93.264,0.6,0.759,0,1.61,NA,NA,2365,389,NA,NA,0,2016-07-13 07:00:00,2016-07-13,22,1
		1305,"Subject 9",5,"0109",2016-07-13 07:51:53,96.9615,70.209,0.5,0.724,0.01,1.62,NA,NA,1648,26,NA,NA,0,2016-07-13 07:00:00,2016-07-13,22,1
		1306,"Subject 9",5,"0109",2016-07-13 08:19:53,97.005,72.7755,0.5,0.75,0,1.62,NA,NA,566,42,NA,NA,0,2016-07-13 08:00:00,2016-07-13,23,1
		1307,"Subject 9",5,"0109",2016-07-13 08:47:53,119.451,99.093,0.6,0.83,0.1,1.72,NA,NA,3989,1735,NA,NA,0,2016-07-13 08:00:00,2016-07-13,23,1
		1308,"Subject 9",5,"0109",2016-07-13 09:15:53,109.272,82.1715,0.5,0.752,0,1.72,NA,NA,2170,394,NA,NA,0,2016-07-13 09:00:00,2016-07-13,24,1
		1309,"Subject 9",5,"0109",2016-07-13 09:43:53,99.963,75.2115,0.5,0.752,0,1.72,NA,NA,690,22,NA,NA,0,2016-07-13 09:00:00,2016-07-13,24,1
		1310,"Subject 9",5,"0109",2016-07-13 10:11:53,121.539,99.5715,0.6,0.819,0.09,1.81,NA,NA,1690,599,NA,NA,0,2016-07-13 10:00:00,2016-07-13,25,1
		1311,"Subject 9",5,"0109",2016-07-13 10:39:53,101.616,79.779,0.5,0.785,0.03,1.84,NA,NA,2295,538,NA,NA,0,2016-07-13 10:00:00,2016-07-13,25,1
		1312,"Subject 9",5,"0109",2016-07-13 11:07:53,112.9695,87.87,0.5,0.778,0.13,1.97,NA,NA,576,91,NA,NA,0,2016-07-13 11:00:00,2016-07-13,26,1
		1313,"Subject 9",5,"0109",2016-07-13 11:35:53,110.316,89.0445,0.5,0.807,0.06,2.03,NA,NA,1048,148,NA,NA,0,2016-07-13 11:00:00,2016-07-13,26,1
		1314,"Subject 9",5,"0109",2016-07-13 12:03:53,95.874,73.7325,0.5,0.769,0,2.03,NA,NA,2802,676,NA,NA,0,2016-07-13 12:00:00,2016-07-13,27,1
		1315,"Subject 9",5,"0109",2016-07-13 12:31:53,102.4425,80.7795,0.5,0.788,0.01,2.04,NA,NA,861,71,NA,NA,0,2016-07-13 12:00:00,2016-07-13,27,1
		1316,"Subject 9",5,"0109",2016-07-13 12:59:53,117.015,93.96,0.6,0.803,0.1,2.14,NA,NA,1734,325,NA,NA,0,2016-07-13 12:00:00,2016-07-13,27,1
		1317,"Subject 9",5,"0109",2016-07-13 13:27:53,101.1375,82.3455,0.5,0.814,0,2.14,NA,NA,469,90,NA,NA,0,2016-07-13 13:00:00,2016-07-13,28,1
		1318,"Subject 9",5,"0109",2016-07-13 13:55:53,122.583,99.1365,0.6,0.809,0.02,2.16,NA,NA,1680,457,NA,NA,0,2016-07-13 13:00:00,2016-07-13,28,1
		1319,"Subject 9",5,"0109",2016-07-13 14:23:53,126.4545,101.3985,0.6,0.802,0.08,2.24,NA,NA,4552,2111,NA,NA,0,2016-07-13 14:00:00,2016-07-13,29,1
		1320,"Subject 9",5,"0109",2016-07-13 14:51:53,82.128,61.596,0.4,0.75,0.01,2.25,NA,NA,1275,557,NA,NA,0,2016-07-13 14:00:00,2016-07-13,29,1
		1321,"Subject 9",5,"0109",2016-07-13 15:19:53,123.0615,91.089,0.6,0.74,-0.01,2.24,NA,NA,558,58,NA,NA,0,2016-07-13 15:00:00,2016-07-13,30,1
		1322,"Subject 9",5,"0109",2016-07-13 15:47:53,107.097,81.9975,0.5,0.766,0,2.24,NA,NA,747,58,NA,NA,0,2016-07-13 15:00:00,2016-07-13,30,1
		1323,"Subject 9",5,"0109",2016-07-13 16:15:53,108.5325,83.346,0.5,0.768,-0.01,2.23,NA,NA,1639,388,NA,NA,0,2016-07-13 16:00:00,2016-07-13,31,1
		1324,"Subject 9",5,"0109",2016-07-13 16:43:53,105.6615,80.388,0.5,0.761,0,2.23,NA,NA,936,90,NA,NA,0,2016-07-13 16:00:00,2016-07-13,31,1
		1325,"Subject 9",5,"0109",2016-07-13 17:11:53,104.835,79.6485,0.5,0.76,0.01,2.24,NA,NA,624,196,NA,NA,0,2016-07-13 17:00:00,2016-07-13,32,1
		1326,"Subject 9",5,"0109",2016-07-13 17:39:53,106.6185,81.8235,0.5,0.767,-0.01,2.23,NA,NA,535,80,NA,NA,0,2016-07-13 17:00:00,2016-07-13,32,1
		1327,"Subject 9",5,"0109",2016-07-13 18:07:53,108.3585,81.519,0.5,0.752,0.01,2.24,NA,NA,2292,48,NA,NA,0,2016-07-13 18:00:00,2016-07-13,33,1
		1328,"Subject 9",5,"0109",2016-07-13 18:35:53,111.8385,83.868,0.5,0.75,0,2.24,NA,NA,872,269,NA,NA,0,2016-07-13 18:00:00,2016-07-13,33,1
		1329,"Subject 9",5,"0109",2016-07-13 19:03:53,110.316,81.954,0.5,0.743,-0.01,2.23,NA,NA,1476,501,NA,NA,0,2016-07-13 19:00:00,2016-07-13,34,1
		1330,"Subject 9",5,"0109",2016-07-13 19:31:53,112.665,83.259,0.5,0.739,-0.01,2.22,NA,NA,896,109,NA,NA,0,2016-07-13 19:00:00,2016-07-13,34,1
		1331,"Subject 9",5,"0109",2016-07-13 19:59:53,120.4515,91.0455,0.6,0.756,0,2.22,NA,NA,883,87,NA,NA,0,2016-07-13 19:00:00,2016-07-13,34,1
		1332,"Subject 9",5,"0109",2016-07-13 20:27:53,124.41,91.524,0.6,0.736,0,2.22,NA,NA,1750,434,NA,NA,0,2016-07-13 20:00:00,2016-07-13,35,1
		1333,"Subject 9",5,"0109",2016-07-13 20:55:53,110.2725,81.7365,0.5,0.741,0,2.22,NA,NA,1593,155,NA,NA,0,2016-07-13 20:00:00,2016-07-13,35,1
		1334,"Subject 9",5,"0109",2016-07-13 21:23:53,109.446,80.214,0.5,0.733,-0.01,2.21,NA,NA,1311,49,NA,NA,0,2016-07-13 21:00:00,2016-07-13,36,1
		1335,"Subject 9",5,"0109",2016-07-13 21:51:53,115.449,85.6515,0.5,0.742,0.01,2.22,NA,NA,939,196,NA,NA,0,2016-07-13 21:00:00,2016-07-13,36,1
		1336,"Subject 9",5,"0109",2016-07-13 22:19:53,139.635,104.052,0.7,0.745,0,2.22,NA,NA,3982,1683,NA,NA,0,2016-07-13 22:00:00,2016-07-13,37,1
		1337,"Subject 9",5,"0109",2016-07-13 22:47:53,126.5415,94.3515,0.6,0.746,0,2.22,NA,NA,2996,850,NA,NA,0,2016-07-13 22:00:00,2016-07-13,37,1
		1338,"Subject 9",5,"0109",2016-07-13 23:15:53,118.233,85.869,0.6,0.726,0.01,2.23,NA,NA,1783,311,NA,NA,0,2016-07-13 23:00:00,2016-07-13,38,1
		1339,"Subject 9",5,"0109",2016-07-13 23:43:53,136.3725,104.052,0.6,0.763,0.12,2.35,NA,NA,1282,287,NA,NA,0,2016-07-13 23:00:00,2016-07-13,38,1
		1340,"Subject 9",5,"0109",2016-07-14 00:11:53,117.711,86.913,0.6,0.738,0,2.35,NA,NA,1802,295,NA,NA,0,2016-07-14 00:00:00,2016-07-14,39,2
		1341,"Subject 9",5,"0109",2016-07-14 00:39:53,119.9295,88.5225,0.6,0.738,-0.01,2.34,NA,NA,505,19,NA,NA,0,2016-07-14 00:00:00,2016-07-14,39,2
		1342,"Subject 9",5,"0109",2016-07-14 01:07:53,111.273,82.302,0.5,0.74,0.01,2.35,NA,NA,337,26,NA,NA,0,2016-07-14 01:00:00,2016-07-14,40,2
		1343,"Subject 9",5,"0109",2016-07-14 01:35:53,133.545,102.3555,0.6,0.766,0.12,2.47,NA,NA,2133,486,NA,NA,0,2016-07-14 01:00:00,2016-07-14,40,2
		1344,"Subject 9",5,"0109",2016-07-14 02:03:53,130.848,97.527,0.6,0.745,0,2.47,NA,NA,3254,797,NA,NA,0,2016-07-14 02:00:00,2016-07-14,41,2
		1345,"Subject 9",5,"0109",2016-07-14 02:31:53,116.493,85.4775,0.5,0.734,0,2.47,NA,NA,469,41,NA,NA,0,2016-07-14 02:00:00,2016-07-14,41,2
		1346,"Subject 9",5,"0109",2016-07-14 02:59:53,113.187,83.607,0.5,0.739,0.01,2.48,NA,NA,299,26,NA,NA,0,2016-07-14 02:00:00,2016-07-14,41,2
		1347,"Subject 9",5,"0109",2016-07-14 03:27:53,109.3155,79.3875,0.5,0.726,0,2.48,NA,NA,157,37,NA,NA,0,2016-07-14 03:00:00,2016-07-14,42,2
		1348,"Subject 9",5,"0109",2016-07-14 03:55:53,114.666,83.9115,0.5,0.732,0,2.48,NA,NA,1358,202,NA,NA,0,2016-07-14 03:00:00,2016-07-14,42,2
		1349,"Subject 9",5,"0109",2016-07-14 04:23:53,130.848,97.875,0.6,0.748,0.07,2.55,NA,NA,1617,332,NA,NA,0,2016-07-14 04:00:00,2016-07-14,43,2
		1350,"Subject 9",5,"0109",2016-07-14 04:51:53,127.4115,95.7,0.6,0.751,-0.01,2.54,NA,NA,3069,530,NA,NA,0,2016-07-14 04:00:00,2016-07-14,43,2
		1351,"Subject 9",5,"0109",2016-07-14 05:19:53,111.099,81.432,0.5,0.733,0.01,2.55,NA,NA,886,63,NA,NA,0,2016-07-14 05:00:00,2016-07-14,44,2
		1352,"Subject 9",5,"0109",2016-07-14 05:47:53,156.4695,119.625,0.7,0.764,0.08,2.63,NA,NA,4782,1938,NA,NA,0,2016-07-14 05:00:00,2016-07-14,44,2
		1353,"Subject 9",5,"0109",2016-07-14 06:15:53,139.2,104.226,0.7,0.749,0.1,2.73,NA,NA,3883,1357,NA,NA,0,2016-07-14 06:00:00,2016-07-14,45,2
		1354,"Subject 9",5,"0109",2016-07-14 06:43:53,120.408,88.392,0.6,0.734,0.03,2.76,NA,NA,2992,978,NA,NA,0,2016-07-14 06:00:00,2016-07-14,45,2
		1355,"Subject 9",5,"0109",2016-07-14 07:11:53,106.662,78.2565,0.5,0.734,0,2.76,NA,NA,772,45,NA,NA,0,2016-07-14 07:00:00,2016-07-14,46,2
		1356,"Subject 9",5,"0109",2016-07-14 07:39:53,102.4425,75.255,0.5,0.735,0.02,2.78,NA,NA,1725,29,NA,NA,0,2016-07-14 07:00:00,2016-07-14,46,2
		1357,"Subject 9",5,"0109",2016-07-14 08:07:53,123.018,92.655,0.6,0.753,-0.01,2.77,NA,NA,2551,627,NA,NA,0,2016-07-14 08:00:00,2016-07-14,47,2
		1358,"Subject 9",5,"0109",2016-07-14 08:35:53,120.7125,94.0905,0.6,0.779,0.03,2.8,NA,NA,3697,1098,NA,NA,0,2016-07-14 08:00:00,2016-07-14,47,2
		1359,"Subject 9",5,"0109",2016-07-14 09:03:53,109.6635,79.5615,0.5,0.725,0.01,2.81,NA,NA,1188,168,NA,NA,0,2016-07-14 09:00:00,2016-07-14,48,2
		1360,"Subject 9",5,"0109",2016-07-14 09:31:53,100.0935,73.776,0.5,0.737,0,2.81,NA,NA,408,32,NA,NA,0,2016-07-14 09:00:00,2016-07-14,48,2
		1361,"Subject 9",5,"0109",2016-07-14 09:59:53,113.4915,86.652,0.5,0.763,-0.01,2.8,NA,NA,2444,619,NA,NA,0,2016-07-14 09:00:00,2016-07-14,48,2
		1362,"Subject 9",5,"0109",2016-07-14 10:27:53,100.746,73.863,0.5,0.733,0.01,2.81,NA,NA,852,29,NA,NA,0,2016-07-14 10:00:00,2016-07-14,49,2
		1363,"Subject 9",5,"0109",2016-07-14 10:55:53,102.7905,75.9075,0.5,0.738,0,2.81,NA,NA,1042,55,NA,NA,0,2016-07-14 10:00:00,2016-07-14,49,2
		1364,"Subject 9",5,"0109",2016-07-14 11:23:53,98.832,73.95,0.5,0.748,0.01,2.82,NA,NA,667,50,NA,NA,0,2016-07-14 11:00:00,2016-07-14,50,2
		1365,"Subject 9",5,"0109",2016-07-14 11:51:53,127.7595,96.309,0.6,0.754,0.02,2.84,NA,NA,2960,548,NA,NA,0,2016-07-14 11:00:00,2016-07-14,50,2
		1366,"Subject 9",5,"0109",2016-07-14 12:19:53,105.531,78.648,0.5,0.745,0,2.84,NA,NA,1710,98,NA,NA,0,2016-07-14 12:00:00,2016-07-14,51,2
		1367,"Subject 9",5,"0109",2016-07-14 12:47:53,98.31,73.6455,0.5,0.749,0,2.84,NA,NA,310,35,NA,NA,0,2016-07-14 12:00:00,2016-07-14,51,2
		1368,"Subject 9",5,"0109",2016-07-14 13:15:53,100.485,76.125,0.5,0.757,0.01,2.85,NA,NA,264,46,NA,NA,0,2016-07-14 13:00:00,2016-07-14,52,2
		1369,"Subject 9",5,"0109",2016-07-14 13:43:53,115.7535,85.1295,0.5,0.735,0,2.85,NA,NA,1401,363,NA,NA,0,2016-07-14 13:00:00,2016-07-14,52,2
		1370,"Subject 9",5,"0109",2016-07-14 14:11:53,119.4075,89.001,0.6,0.745,0,2.85,NA,NA,2060,450,NA,NA,0,2016-07-14 14:00:00,2016-07-14,53,2
		1371,"Subject 9",5,"0109",2016-07-14 14:39:53,103.008,76.6905,0.5,0.745,0,2.85,NA,NA,1791,186,NA,NA,0,2016-07-14 14:00:00,2016-07-14,53,2
		1372,"Subject 9",5,"0109",2016-07-14 15:07:53,108.837,80.0835,0.5,0.736,0,2.85,NA,NA,2088,178,NA,NA,0,2016-07-14 15:00:00,2016-07-14,54,2
		1373,"Subject 9",5,"0109",2016-07-14 15:35:53,101.442,74.472,0.5,0.734,0.01,2.86,NA,NA,600,32,NA,NA,0,2016-07-14 15:00:00,2016-07-14,54,2
		1374,"Subject 9",5,"0109",2016-07-14 16:03:53,107.1405,78.648,0.5,0.734,0,2.86,NA,NA,1228,153,NA,NA,0,2016-07-14 16:00:00,2016-07-14,55,2
		1375,"Subject 9",5,"0109",2016-07-14 16:31:53,101.3115,73.341,0.5,0.724,0.01,2.87,NA,NA,2697,51,NA,NA,0,2016-07-14 16:00:00,2016-07-14,55,2
		1376,"Subject 9",5,"0109",2016-07-14 16:59:53,97.3095,71.688,0.5,0.737,0,2.87,NA,NA,709,95,NA,NA,0,2016-07-14 16:00:00,2016-07-14,55,2
		1377,"Subject 9",5,"0109",2016-07-14 17:27:53,114.3615,86.5215,0.5,0.757,0,2.87,NA,NA,1472,219,NA,NA,0,2016-07-14 17:00:00,2016-07-14,56,2
		1378,"Subject 9",5,"0109",2016-07-14 17:55:53,105.444,78.039,0.5,0.74,0,2.87,NA,NA,2275,338,NA,NA,0,2016-07-14 17:00:00,2016-07-14,56,2
		1379,"Subject 9",5,"0109",2016-07-14 18:23:53,116.754,86.7825,0.6,0.744,0.04,2.91,NA,NA,2060,160,NA,NA,0,2016-07-14 18:00:00,2016-07-14,57,2
		1380,"Subject 9",5,"0109",2016-07-14 18:51:53,108.837,80.736,0.5,0.742,0,2.91,NA,NA,2212,678,NA,NA,0,2016-07-14 18:00:00,2016-07-14,57,2
		1381,"Subject 9",5,"0109",2016-07-14 19:19:53,115.7535,88.044,0.6,0.761,0.02,2.93,NA,NA,1125,109,NA,NA,0,2016-07-14 19:00:00,2016-07-14,58,2
		1382,"Subject 9",5,"0109",2016-07-14 19:47:53,115.449,84.651,0.5,0.733,0,2.93,NA,NA,3552,634,NA,NA,0,2016-07-14 19:00:00,2016-07-14,58,2
		1383,"Subject 9",5,"0109",2016-07-14 20:15:53,131.7615,98.049,0.6,0.744,0.05,2.98,NA,NA,3341,856,NA,NA,0,2016-07-14 20:00:00,2016-07-14,59,2
		1384,"Subject 9",5,"0109",2016-07-14 20:43:53,146.9865,111.186,0.7,0.756,0.06,3.04,NA,NA,2810,865,NA,NA,0,2016-07-14 20:00:00,2016-07-14,59,2
		1385,"Subject 9",5,"0109",2016-07-14 21:11:53,122.1045,91.785,0.6,0.751,0.07,3.11,NA,NA,3748,1417,NA,NA,0,2016-07-14 21:00:00,2016-07-14,60,2
		1386,"Subject 9",5,"0109",2016-07-14 21:39:53,134.502,102.225,0.6,0.76,0.02,3.13,NA,NA,2620,844,NA,NA,0,2016-07-14 21:00:00,2016-07-14,60,2
		1387,"Subject 9",5,"0109",2016-07-14 22:07:53,119.3205,86.5215,0.6,0.725,0,3.13,NA,NA,2629,515,NA,NA,0,2016-07-14 22:00:00,2016-07-14,61,2
		1388,"Subject 9",5,"0109",2016-07-14 22:35:53,121.8,88.392,0.6,0.726,0.05,3.18,NA,NA,2166,524,NA,NA,0,2016-07-14 22:00:00,2016-07-14,61,2
		1389,"Subject 9",5,"0109",2016-07-14 23:03:53,127.803,96.222,0.6,0.753,0.04,3.22,NA,NA,3189,1014,NA,NA,0,2016-07-14 23:00:00,2016-07-14,62,2
		1390,"Subject 9",5,"0109",2016-07-14 23:31:53,118.1895,86.565,0.6,0.732,0,3.22,NA,NA,1684,307,NA,NA,0,2016-07-14 23:00:00,2016-07-14,62,2
		1391,"Subject 9",5,"0109",2016-07-14 23:59:53,151.0755,116.319,0.7,0.77,0.11,3.33,NA,NA,3368,1243,NA,NA,0,2016-07-14 23:00:00,2016-07-14,62,2
		1392,"Subject 9",5,"0109",2016-07-15 00:27:53,123.5835,90.6105,0.6,0.733,0,3.33,NA,NA,2996,589,NA,NA,0,2016-07-15 00:00:00,2016-07-15,63,3
		1393,"Subject 9",5,"0109",2016-07-15 00:55:53,109.1415,80.4315,0.5,0.737,0.01,3.34,NA,NA,542,20,NA,NA,0,2016-07-15 00:00:00,2016-07-15,63,3
		1394,"Subject 9",5,"0109",2016-07-15 01:23:53,116.58,87.8265,0.6,0.753,0.04,3.38,NA,NA,1856,308,NA,NA,0,2016-07-15 01:00:00,2016-07-15,64,3
		1395,"Subject 9",5,"0109",2016-07-15 01:51:53,113.187,82.998,0.5,0.733,0,3.38,NA,NA,1127,70,NA,NA,0,2016-07-15 01:00:00,2016-07-15,64,3
		1396,"Subject 9",5,"0109",2016-07-15 02:19:53,110.664,81.4755,0.5,0.736,0,3.38,NA,NA,966,208,NA,NA,0,2016-07-15 02:00:00,2016-07-15,65,3
		1397,"Subject 9",5,"0109",2016-07-15 02:47:53,105.705,76.7775,0.5,0.726,0.03,3.41,NA,NA,2773,759,NA,NA,0,2016-07-15 02:00:00,2016-07-15,65,3
		1398,"Subject 9",5,"0109",2016-07-15 03:15:53,112.7955,87.1305,0.5,0.773,0.06,3.47,NA,NA,1255,112,NA,NA,0,2016-07-15 03:00:00,2016-07-15,66,3
		1399,"Subject 9",5,"0109",2016-07-15 03:43:53,122.322,90.5235,0.6,0.74,0,3.47,NA,NA,1249,241,NA,NA,0,2016-07-15 03:00:00,2016-07-15,66,3
		1400,"Subject 9",5,"0109",2016-07-15 04:11:53,131.37,96.8745,0.6,0.737,0.01,3.48,NA,NA,2084,378,NA,NA,0,2016-07-15 04:00:00,2016-07-15,67,3
		1401,"Subject 9",5,"0109",2016-07-15 04:39:53,142.2015,113.3175,0.7,0.797,0.14,3.62,NA,NA,5334,2506,NA,NA,0,2016-07-15 04:00:00,2016-07-15,67,3
		1402,"Subject 9",5,"0109",2016-07-15 05:07:53,108.663,81.171,0.5,0.747,-0.01,3.61,NA,NA,2212,672,NA,NA,0,2016-07-15 05:00:00,2016-07-15,68,3
		1403,"Subject 9",5,"0109",2016-07-15 05:35:53,149.7705,116.7975,0.7,0.78,0.21,3.82,NA,NA,3641,1330,NA,NA,0,2016-07-15 05:00:00,2016-07-15,68,3
		1404,"Subject 9",5,"0109",2016-07-15 06:03:53,137.286,108.6195,0.7,0.791,0.03,3.85,NA,NA,4052,1210,NA,NA,0,2016-07-15 06:00:00,2016-07-15,69,3
		1405,"Subject 9",5,"0109",2016-07-15 06:31:53,104.922,79.344,0.5,0.756,0,3.85,NA,NA,1260,58,NA,NA,0,2016-07-15 06:00:00,2016-07-15,69,3
		1406,"Subject 9",5,"0109",2016-07-15 06:59:53,108.402,81.6495,0.5,0.753,0.01,3.86,NA,NA,1952,74,NA,NA,0,2016-07-15 06:00:00,2016-07-15,69,3
		1407,"Subject 9",5,"0109",2016-07-15 07:27:53,116.9715,91.5675,0.6,0.783,0,3.86,NA,NA,1632,290,NA,NA,0,2016-07-15 07:00:00,2016-07-15,70,3
		1408,"Subject 9",5,"0109",2016-07-15 07:55:53,116.754,92.5245,0.6,0.793,0.11,3.97,NA,NA,3298,858,NA,NA,0,2016-07-15 07:00:00,2016-07-15,70,3
		1409,"Subject 9",5,"0109",2016-07-15 08:23:53,102.7905,75.168,0.5,0.731,0,3.97,NA,NA,718,46,NA,NA,0,2016-07-15 08:00:00,2016-07-15,71,3
		1410,"Subject 9",5,"0109",2016-07-15 08:51:53,100.7895,76.6905,0.5,0.761,0.01,3.98,NA,NA,419,93,NA,NA,0,2016-07-15 08:00:00,2016-07-15,71,3
		1411,"Subject 9",5,"0109",2016-07-15 09:19:53,124.4535,94.5255,0.6,0.76,0.06,4.04,NA,NA,2141,673,NA,NA,0,2016-07-15 09:00:00,2016-07-15,72,3
		1412,"Subject 9",5,"0109",2016-07-15 09:47:53,100.485,76.647,0.5,0.763,0.01,4.05,NA,NA,1332,230,NA,NA,0,2016-07-15 09:00:00,2016-07-15,72,3
		1413,"Subject 9",5,"0109",2016-07-15 10:15:53,94.0905,71.862,0.4,0.764,0,4.05,NA,NA,637,72,NA,NA,0,2016-07-15 10:00:00,2016-07-15,73,3
		1414,"Subject 9",5,"0109",2016-07-15 10:43:53,99.7455,75.516,0.5,0.757,0.01,4.06,NA,NA,1208,83,NA,NA,0,2016-07-15 10:00:00,2016-07-15,73,3
		1415,"Subject 9",5,"0109",2016-07-15 11:11:53,139.7655,104.6175,0.7,0.749,0,4.06,NA,NA,1864,564,NA,NA,0,2016-07-15 11:00:00,2016-07-15,74,3
		1416,"Subject 9",5,"0109",2016-07-15 11:39:53,108.1845,81.954,0.5,0.758,0.02,4.08,NA,NA,1758,293,NA,NA,0,2016-07-15 11:00:00,2016-07-15,74,3
		1417,"Subject 9",5,"0109",2016-07-15 12:07:53,100.4415,78.4305,0.5,0.781,0.03,4.11,NA,NA,1057,258,NA,NA,0,2016-07-15 12:00:00,2016-07-15,75,3
		1418,"Subject 9",5,"0109",2016-07-15 12:35:53,47.3715,32.712,0.2,0.69,0.01,4.12,NA,NA,733,204,NA,NA,0,2016-07-15 12:00:00,2016-07-15,75,3
		1419,"Subject 9",5,"0109",2016-07-15 13:03:53,117.189,88.74,0.6,0.757,-0.01,4.11,NA,NA,579,65,NA,NA,0,2016-07-15 13:00:00,2016-07-15,76,3
		1420,"Subject 9",5,"0109",2016-07-15 13:31:53,103.4865,77.952,0.5,0.753,0,4.11,NA,NA,660,116,NA,NA,0,2016-07-15 13:00:00,2016-07-15,76,3
		1421,"Subject 9",5,"0109",2016-07-15 13:59:53,98.0055,72.471,0.5,0.74,0,4.11,NA,NA,614,106,NA,NA,0,2016-07-15 13:00:00,2016-07-15,76,3
		1422,"Subject 9",5,"0109",2016-07-15 14:27:53,100.0065,76.0815,0.5,0.761,0,4.11,NA,NA,1385,109,NA,NA,0,2016-07-15 14:00:00,2016-07-15,77,3
		1423,"Subject 9",5,"0109",2016-07-15 14:55:53,102.8775,77.5605,0.5,0.754,0,4.11,NA,NA,144,21,NA,NA,0,2016-07-15 14:00:00,2016-07-15,77,3
		1424,"Subject 9",5,"0109",2016-07-15 15:23:53,108.228,82.476,0.5,0.762,0.06,4.17,NA,NA,773,91,NA,NA,0,2016-07-15 15:00:00,2016-07-15,78,3
		1425,"Subject 9",5,"0109",2016-07-15 15:51:53,103.965,78.735,0.5,0.758,0,4.17,NA,NA,1533,189,NA,NA,0,2016-07-15 15:00:00,2016-07-15,78,3
		1426,"Subject 9",5,"0109",2016-07-15 16:19:53,101.9205,77.1255,0.5,0.757,0,4.17,NA,NA,995,45,NA,NA,0,2016-07-15 16:00:00,2016-07-15,79,3
		1427,"Subject 9",5,"0109",2016-07-15 16:47:53,101.4855,80.0835,0.5,0.789,0.04,4.21,NA,NA,978,29,NA,NA,0,2016-07-15 16:00:00,2016-07-15,79,3
		1428,"Subject 9",5,"0109",2016-07-15 17:15:53,116.5365,91.9155,0.6,0.789,0.02,4.23,NA,NA,1683,440,NA,NA,0,2016-07-15 17:00:00,2016-07-15,80,3
		1429,"Subject 9",5,"0109",2016-07-15 17:43:53,106.401,79.6485,0.5,0.749,0.01,4.24,NA,NA,1863,285,NA,NA,0,2016-07-15 17:00:00,2016-07-15,80,3
		1430,"Subject 9",5,"0109",2016-07-15 18:11:53,122.3655,94.1775,0.6,0.769,0.05,4.29,NA,NA,2506,680,NA,NA,0,2016-07-15 18:00:00,2016-07-15,81,3
		1431,"Subject 9",5,"0109",2016-07-15 18:39:53,107.3145,81.8235,0.5,0.763,0.08,4.37,NA,NA,1280,118,NA,NA,0,2016-07-15 18:00:00,2016-07-15,81,3
		1432,"Subject 9",5,"0109",2016-07-15 19:07:53,127.89,101.877,0.6,0.797,-0.01,4.36,NA,NA,1303,304,NA,NA,0,2016-07-15 19:00:00,2016-07-15,82,3
		1433,"Subject 9",5,"0109",2016-07-15 19:35:53,119.7555,88.74,0.6,0.741,0,4.36,NA,NA,1969,360,NA,NA,0,2016-07-15 19:00:00,2016-07-15,82,3
		1434,"Subject 9",5,"0109",2016-07-15 20:03:53,130.152,103.9215,0.6,0.798,0.17,4.53,NA,NA,3666,1499,NA,NA,0,2016-07-15 20:00:00,2016-07-15,83,3
		1435,"Subject 9",5,"0109",2016-07-15 20:31:53,116.841,87.7395,0.6,0.751,0,4.53,NA,NA,1159,211,NA,NA,0,2016-07-15 20:00:00,2016-07-15,83,3
		1436,"Subject 9",5,"0109",2016-07-15 20:59:53,146.6385,117.6675,0.7,0.802,0.12,4.65,NA,NA,3177,1303,NA,NA,0,2016-07-15 20:00:00,2016-07-15,83,3
		1437,"Subject 9",5,"0109",2016-07-15 21:27:53,127.3245,97.7445,0.6,0.768,0.06,4.71,NA,NA,4080,1343,NA,NA,0,2016-07-15 21:00:00,2016-07-15,84,3
		1438,"Subject 9",5,"0109",2016-07-15 21:55:53,114.1875,85.347,0.5,0.747,0,4.71,NA,NA,792,105,NA,NA,0,2016-07-15 21:00:00,2016-07-15,84,3
		1439,"Subject 9",5,"0109",2016-07-15 22:23:53,122.583,99.4845,0.6,0.811,0.05,4.76,NA,NA,1799,327,NA,NA,0,2016-07-15 22:00:00,2016-07-15,85,3
		1440,"Subject 9",5,"0109",2016-07-15 22:51:53,112.0995,82.824,0.5,0.739,0.01,4.77,NA,NA,1174,203,NA,NA,0,2016-07-15 22:00:00,2016-07-15,85,3
		1441,"Subject 9",5,"0109",2016-07-15 23:19:53,112.2735,85.4775,0.5,0.761,0.04,4.81,NA,NA,1316,77,NA,NA,0,2016-07-15 23:00:00,2016-07-15,86,3
		1442,"Subject 9",5,"0109",2016-07-15 23:47:53,111.4035,85.434,0.5,0.767,0.07,4.88,NA,NA,1834,293,NA,NA,0,2016-07-15 23:00:00,2016-07-15,86,3
		1443,"Subject 9",5,"0109",2016-07-16 00:15:53,137.6775,108.315,0.7,0.787,0.12,5,NA,NA,3580,1382,NA,NA,0,2016-07-16 00:00:00,2016-07-16,87,4
		1444,"Subject 9",5,"0109",2016-07-16 00:43:53,117.711,88.6095,0.6,0.753,0,5,NA,NA,742,110,NA,NA,0,2016-07-16 00:00:00,2016-07-16,87,4
		1445,"Subject 9",5,"0109",2016-07-16 01:11:53,106.6185,81.519,0.5,0.764,0,5,NA,NA,552,61,NA,NA,0,2016-07-16 01:00:00,2016-07-16,88,4
		1446,"Subject 9",5,"0109",2016-07-16 01:39:53,101.5725,75.2985,0.5,0.741,0,5,NA,NA,1899,301,NA,NA,0,2016-07-16 01:00:00,2016-07-16,88,4
		1447,"Subject 9",5,"0109",2016-07-16 02:07:53,112.752,88.044,0.5,0.781,0.06,5.06,NA,NA,1345,162,NA,NA,0,2016-07-16 02:00:00,2016-07-16,89,4
		1448,"Subject 9",5,"0109",2016-07-16 02:35:53,107.532,81.171,0.5,0.755,0.01,5.07,NA,NA,823,43,NA,NA,0,2016-07-16 02:00:00,2016-07-16,89,4
		1449,"Subject 9",5,"0109",2016-07-16 03:03:53,106.0095,79.605,0.5,0.751,0.03,5.1,NA,NA,1435,200,NA,NA,0,2016-07-16 03:00:00,2016-07-16,90,4
		1450,"Subject 9",5,"0109",2016-07-16 03:31:53,116.2755,92.7855,0.6,0.798,0.07,5.17,NA,NA,2439,623,NA,NA,0,2016-07-16 03:00:00,2016-07-16,90,4
		1451,"Subject 9",5,"0109",2016-07-16 03:59:53,103.008,80.0835,0.5,0.777,0.03,5.2,NA,NA,623,80,NA,NA,0,2016-07-16 03:00:00,2016-07-16,90,4
		1452,"Subject 9",5,"0109",2016-07-16 04:27:53,102.3555,81.1275,0.5,0.793,0.04,5.24,NA,NA,752,61,NA,NA,0,2016-07-16 04:00:00,2016-07-16,91,4
		1453,"Subject 9",5,"0109",2016-07-16 04:55:53,146.421,111.4035,0.7,0.761,0.09,5.33,NA,NA,4022,1116,NA,NA,0,2016-07-16 04:00:00,2016-07-16,91,4
		1454,"Subject 9",5,"0109",2016-07-16 05:23:53,111.099,84.6075,0.5,0.761,0.08,5.41,NA,NA,2082,532,NA,NA,0,2016-07-16 05:00:00,2016-07-16,92,4
		1455,"Subject 9",5,"0109",2016-07-16 05:51:53,142.071,110.5335,0.7,0.778,0.05,5.46,NA,NA,2820,1132,NA,NA,0,2016-07-16 05:00:00,2016-07-16,92,4
		1456,"Subject 9",5,"0109",2016-07-16 06:19:53,105.9225,80.997,0.5,0.765,0.05,5.51,NA,NA,1076,164,NA,NA,0,2016-07-16 06:00:00,2016-07-16,93,4
		1457,"Subject 9",5,"0109",2016-07-16 06:47:53,128.325,100.7895,0.6,0.785,0.01,5.52,NA,NA,1645,449,NA,NA,0,2016-07-16 06:00:00,2016-07-16,93,4
		1458,"Subject 9",5,"0109",2016-07-16 07:15:53,113.3175,90.3495,0.5,0.797,0.13,5.65,NA,NA,3660,1328,NA,NA,0,2016-07-16 07:00:00,2016-07-16,94,4
		1459,"Subject 9",5,"0109",2016-07-16 07:43:53,103.791,77.952,0.5,0.751,0.01,5.66,NA,NA,1696,261,NA,NA,0,2016-07-16 07:00:00,2016-07-16,94,4
		1460,"Subject 9",5,"0109",2016-07-16 08:11:53,109.098,83.868,0.5,0.768,0.03,5.69,NA,NA,1540,64,NA,NA,0,2016-07-16 08:00:00,2016-07-16,95,4
		1461,"Subject 9",5,"0109",2016-07-16 08:39:53,92.742,73.7325,0.4,0.795,0.03,5.72,NA,NA,1582,336,NA,NA,0,2016-07-16 08:00:00,2016-07-16,95,4
		1462,"Subject 9",5,"0109",2016-07-16 09:07:53,101.877,79.3875,0.5,0.779,0.08,5.8,NA,NA,1306,58,NA,NA,0,2016-07-16 09:00:00,2016-07-16,96,4
		1463,"Subject 9",5,"0109",2016-07-16 09:35:53,112.23,89.523,0.5,0.798,0.01,5.81,NA,NA,984,154,NA,NA,0,2016-07-16 09:00:00,2016-07-16,96,4
		1464,"Subject 9",5,"0109",2016-07-16 10:03:53,102.6165,77.4735,0.5,0.755,-0.01,5.8,NA,NA,1857,337,NA,NA,0,2016-07-16 10:00:00,2016-07-16,97,4
		1465,"Subject 9",5,"0109",2016-07-16 10:31:53,94.7865,71.3835,0.4,0.753,0.01,5.81,NA,NA,485,45,NA,NA,0,2016-07-16 10:00:00,2016-07-16,97,4
		1466,"Subject 9",5,"0109",2016-07-16 10:59:53,97.6575,74.6895,0.5,0.765,0,5.81,NA,NA,411,86,NA,NA,0,2016-07-16 10:00:00,2016-07-16,97,4
		1467,"Subject 9",5,"0109",2016-07-16 11:27:53,99.615,74.1675,0.5,0.744,0,5.81,NA,NA,679,32,NA,NA,0,2016-07-16 11:00:00,2016-07-16,98,4
		1468,"Subject 9",5,"0109",2016-07-16 11:55:53,94.3515,72.1665,0.4,0.765,0,5.81,NA,NA,1036,158,NA,NA,0,2016-07-16 11:00:00,2016-07-16,98,4
		1469,"Subject 9",5,"0109",2016-07-16 12:23:53,92.2635,69.948,0.4,0.758,0.07,5.88,NA,NA,845,244,NA,NA,0,2016-07-16 12:00:00,2016-07-16,99,4
		1470,"Subject 9",5,"0109",2016-07-16 12:51:53,109.881,83.172,0.5,0.757,-0.02,5.86,NA,NA,648,109,NA,NA,0,2016-07-16 12:00:00,2016-07-16,99,4
		1471,"Subject 9",5,"0109",2016-07-16 13:19:53,101.181,74.6025,0.5,0.737,0.01,5.87,NA,NA,961,98,NA,NA,0,2016-07-16 13:00:00,2016-07-16,100,4
		1472,"Subject 9",5,"0109",2016-07-16 13:47:53,104.6175,78.4305,0.5,0.75,0,5.87,NA,NA,630,56,NA,NA,0,2016-07-16 13:00:00,2016-07-16,100,4
		1473,"Subject 9",5,"0109",2016-07-16 14:15:53,112.2735,86.652,0.5,0.772,0,5.87,NA,NA,733,136,NA,NA,0,2016-07-16 14:00:00,2016-07-16,101,4
		1474,"Subject 9",5,"0109",2016-07-16 14:43:53,98.0055,73.428,0.5,0.749,0.01,5.88,NA,NA,1142,21,NA,NA,0,2016-07-16 14:00:00,2016-07-16,101,4
		1475,"Subject 9",5,"0109",2016-07-16 15:11:53,100.9635,76.386,0.5,0.757,0,5.88,NA,NA,1884,45,NA,NA,0,2016-07-16 15:00:00,2016-07-16,102,4
		1476,"Subject 9",5,"0109",2016-07-16 15:39:53,98.8755,76.212,0.5,0.771,0.03,5.91,NA,NA,428,56,NA,NA,0,2016-07-16 15:00:00,2016-07-16,102,4
		1477,"Subject 9",5,"0109",2016-07-16 16:07:53,113.4915,88.74,0.5,0.782,-0.01,5.9,NA,NA,1367,126,NA,NA,0,2016-07-16 16:00:00,2016-07-16,103,4
		1478,"Subject 9",5,"0109",2016-07-16 16:35:53,105.009,79.344,0.5,0.756,0.04,5.94,NA,NA,1430,62,NA,NA,0,2016-07-16 16:00:00,2016-07-16,103,4
		1479,"Subject 9",5,"0109",2016-07-16 17:03:53,99.528,76.6905,0.5,0.771,0.04,5.98,NA,NA,1327,75,NA,NA,0,2016-07-16 17:00:00,2016-07-16,104,4
		1480,"Subject 9",5,"0109",2016-07-16 17:31:53,119.451,90.045,0.6,0.754,0,5.98,NA,NA,2321,639,NA,NA,0,2016-07-16 17:00:00,2016-07-16,104,4
		1481,"Subject 9",5,"0109",2016-07-16 17:59:53,116.667,90.219,0.6,0.773,0.11,6.09,NA,NA,854,176,NA,NA,0,2016-07-16 17:00:00,2016-07-16,104,4
		1482,"Subject 9",5,"0109",2016-07-16 18:27:53,106.0095,81.606,0.5,0.77,0,6.09,NA,NA,1270,155,NA,NA,0,2016-07-16 18:00:00,2016-07-16,105,4
		1483,"Subject 9",5,"0109",2016-07-16 18:55:53,137.6775,105.1395,0.7,0.764,-0.01,6.08,NA,NA,2582,404,NA,NA,0,2016-07-16 18:00:00,2016-07-16,105,4
		1484,"Subject 9",5,"0109",2016-07-16 19:23:53,133.806,109.881,0.6,0.821,0.17,6.25,NA,NA,4519,2115,NA,NA,0,2016-07-16 19:00:00,2016-07-16,106,4
		1485,"Subject 9",5,"0109",2016-07-16 19:51:53,129.282,99.3105,0.6,0.768,0.01,6.26,NA,NA,2451,605,NA,NA,0,2016-07-16 19:00:00,2016-07-16,106,4
		1486,"Subject 9",5,"0109",2016-07-16 20:19:53,111.4905,86.3475,0.5,0.774,0.03,6.29,NA,NA,2122,174,NA,NA,0,2016-07-16 20:00:00,2016-07-16,107,4
		1487,"Subject 9",5,"0109",2016-07-16 20:47:53,112.7085,91.785,0.5,0.814,0.2,6.49,NA,NA,530,111,NA,NA,0,2016-07-16 20:00:00,2016-07-16,107,4
		1488,"Subject 9",5,"0109",2016-07-16 21:15:53,132.6315,107.793,0.6,0.813,0.15,6.64,NA,NA,5122,2364,NA,NA,0,2016-07-16 21:00:00,2016-07-16,108,4
		1489,"Subject 9",5,"0109",2016-07-16 21:43:53,115.014,87.2175,0.5,0.758,0,6.64,NA,NA,1895,266,NA,NA,0,2016-07-16 21:00:00,2016-07-16,108,4
		1490,"Subject 9",5,"0109",2016-07-16 22:11:53,130.7175,103.443,0.6,0.792,0.08,6.72,NA,NA,2678,736,NA,NA,0,2016-07-16 22:00:00,2016-07-16,109,4
		1491,"Subject 9",5,"0109",2016-07-16 22:39:53,129.63,103.791,0.6,0.801,-0.01,6.71,NA,NA,2875,790,NA,NA,0,2016-07-16 22:00:00,2016-07-16,109,4
		1492,"Subject 9",5,"0109",2016-07-16 23:07:53,132.414,101.2245,0.6,0.765,0,6.71,NA,NA,3347,794,NA,NA,0,2016-07-16 23:00:00,2016-07-16,110,4
		1493,"Subject 9",5,"0109",2016-07-16 23:35:53,129.717,100.485,0.6,0.775,0.01,6.72,NA,NA,3627,891,NA,NA,0,2016-07-16 23:00:00,2016-07-16,110,4
		1494,"Subject 9",5,"0109",2016-07-17 00:03:53,110.6205,79.8225,0.5,0.722,0,6.72,NA,NA,1326,107,NA,NA,0,2016-07-17 00:00:00,2016-07-17,111,5
		1495,"Subject 9",5,"0109",2016-07-17 00:31:53,103.0515,80.6055,0.5,0.782,0.07,6.79,NA,NA,425,84,NA,NA,0,2016-07-17 00:00:00,2016-07-17,111,5
		1496,"Subject 9",5,"0109",2016-07-17 00:59:53,104.748,83.6505,0.5,0.799,0.1,6.89,NA,NA,730,82,NA,NA,0,2016-07-17 00:00:00,2016-07-17,111,5
		1497,"Subject 9",5,"0109",2016-07-17 01:27:53,108.9675,82.4325,0.5,0.757,-0.01,6.88,NA,NA,289,34,NA,NA,0,2016-07-17 01:00:00,2016-07-17,112,5
		1498,"Subject 9",5,"0109",2016-07-17 01:55:53,107.2275,80.214,0.5,0.748,0.01,6.89,NA,NA,1207,227,NA,NA,0,2016-07-17 01:00:00,2016-07-17,112,5
		1499,"Subject 9",5,"0109",2016-07-17 02:23:53,114.6225,88.74,0.5,0.774,0.01,6.9,NA,NA,2132,172,NA,NA,0,2016-07-17 02:00:00,2016-07-17,113,5
		1500,"Subject 9",5,"0109",2016-07-17 02:51:53,103.878,83.1285,0.5,0.8,0.07,6.97,NA,NA,767,46,NA,NA,0,2016-07-17 02:00:00,2016-07-17,113,5
		1501,"Subject 9",5,"0109",2016-07-17 03:19:53,116.841,90.741,0.6,0.777,0.06,7.03,NA,NA,1175,316,NA,NA,0,2016-07-17 03:00:00,2016-07-17,114,5
		1502,"Subject 9",5,"0109",2016-07-17 03:47:53,125.2365,96.918,0.6,0.774,0,7.03,NA,NA,3296,707,NA,NA,0,2016-07-17 03:00:00,2016-07-17,114,5
		1503,"Subject 9",5,"0109",2016-07-17 04:15:53,113.9265,84.999,0.5,0.746,0,7.03,NA,NA,540,88,NA,NA,0,2016-07-17 04:00:00,2016-07-17,115,5
		1504,"Subject 9",5,"0109",2016-07-17 04:43:53,127.803,103.269,0.6,0.808,0.14,7.17,NA,NA,4258,1709,NA,NA,0,2016-07-17 04:00:00,2016-07-17,115,5
		1505,"Subject 9",5,"0109",2016-07-17 05:11:53,116.4495,87.3915,0.6,0.751,0.01,7.18,NA,NA,2028,491,NA,NA,0,2016-07-17 05:00:00,2016-07-17,116,5
		1506,"Subject 9",5,"0109",2016-07-17 05:39:53,136.8945,111.4035,0.7,0.814,0.25,7.43,NA,NA,5126,2280,NA,NA,0,2016-07-17 05:00:00,2016-07-17,116,5
		1507,"Subject 9",5,"0109",2016-07-17 06:07:53,121.7565,95.265,0.6,0.782,0,7.43,NA,NA,2073,542,NA,NA,0,2016-07-17 06:00:00,2016-07-17,117,5
		1508,"Subject 9",5,"0109",2016-07-17 06:35:53,100.1805,77.952,0.5,0.778,0,7.43,NA,NA,174,21,NA,NA,0,2016-07-17 06:00:00,2016-07-17,117,5
		1509,"Subject 9",5,"0109",2016-07-17 07:03:53,97.7445,75.69,0.5,0.774,0.01,7.44,NA,NA,143,22,NA,NA,0,2016-07-17 07:00:00,2016-07-17,118,5
		1510,"Subject 9",5,"0109",2016-07-17 07:31:53,116.6235,96.7005,0.6,0.829,0.1,7.54,NA,NA,2611,809,NA,NA,0,2016-07-17 07:00:00,2016-07-17,118,5
		1511,"Subject 9",5,"0109",2016-07-17 07:59:53,96.918,73.4715,0.5,0.758,0.02,7.56,NA,NA,518,59,NA,NA,0,2016-07-17 07:00:00,2016-07-17,118,5
		1512,"Subject 9",5,"0109",2016-07-17 08:27:53,96.3525,73.2975,0.5,0.761,0,7.56,NA,NA,318,57,NA,NA,0,2016-07-17 08:00:00,2016-07-17,119,5
		1513,"Subject 9",5,"0109",2016-07-17 08:55:53,97.179,74.3415,0.5,0.765,0.02,7.58,NA,NA,1640,134,NA,NA,0,2016-07-17 08:00:00,2016-07-17,119,5
		1514,"Subject 9",5,"0109",2016-07-17 09:23:53,95.4825,71.601,0.5,0.75,0,7.58,NA,NA,878,41,NA,NA,0,2016-07-17 09:00:00,2016-07-17,120,5
		1515,"Subject 9",5,"0109",2016-07-17 09:51:53,108.75,83.8245,0.5,0.771,0.02,7.6,NA,NA,1922,364,NA,NA,0,2016-07-17 09:00:00,2016-07-17,120,5
		1516,"Subject 9",5,"0109",2016-07-17 10:19:53,91.8285,69.774,0.4,0.76,0,7.6,NA,NA,1214,36,NA,NA,0,2016-07-17 10:00:00,2016-07-17,121,5
		1517,"Subject 9",5,"0109",2016-07-17 10:47:53,93.699,70.383,0.4,0.751,0,7.6,NA,NA,511,40,NA,NA,0,2016-07-17 10:00:00,2016-07-17,121,5
		1518,"Subject 9",5,"0109",2016-07-17 11:15:53,95.265,71.7315,0.5,0.753,0.01,7.61,NA,NA,1415,181,NA,NA,0,2016-07-17 11:00:00,2016-07-17,122,5
		1519,"Subject 9",5,"0109",2016-07-17 11:43:53,48.894,38.193,0.2,0.781,0,7.61,NA,NA,839,299,NA,NA,0,2016-07-17 11:00:00,2016-07-17,122,5
		1520,"Subject 9",5,"0109",2016-07-17 12:11:53,115.971,86.391,0.5,0.745,-0.01,7.6,NA,NA,1647,202,NA,NA,0,2016-07-17 12:00:00,2016-07-17,123,5
		1521,"Subject 9",5,"0109",2016-07-17 12:39:53,111.6645,84.4335,0.5,0.756,0,7.6,NA,NA,1199,170,NA,NA,0,2016-07-17 12:00:00,2016-07-17,123,5
		1522,"Subject 9",5,"0109",2016-07-17 13:07:53,100.0065,75.7335,0.5,0.757,-0.01,7.59,NA,NA,1736,245,NA,NA,0,2016-07-17 13:00:00,2016-07-17,124,5
		1523,"Subject 9",5,"0109",2016-07-17 13:35:53,98.4405,73.515,0.5,0.747,0.01,7.6,NA,NA,557,43,NA,NA,0,2016-07-17 13:00:00,2016-07-17,124,5
		1524,"Subject 9",5,"0109",2016-07-17 14:03:53,101.79,76.4295,0.5,0.751,0.01,7.61,NA,NA,1799,288,NA,NA,0,2016-07-17 14:00:00,2016-07-17,125,5
		1525,"Subject 9",5,"0109",2016-07-17 14:31:53,100.05,77.343,0.5,0.773,0.12,7.73,NA,NA,1111,56,NA,NA,0,2016-07-17 14:00:00,2016-07-17,125,5
		1526,"Subject 9",5,"0109",2016-07-17 14:59:53,117.015,93.3075,0.6,0.797,0,7.73,NA,NA,1990,470,NA,NA,0,2016-07-17 14:00:00,2016-07-17,125,5
		1527,"Subject 9",5,"0109",2016-07-17 15:27:53,93.9165,70.992,0.4,0.756,0,7.73,NA,NA,235,12,NA,NA,0,2016-07-17 15:00:00,2016-07-17,126,5
		1528,"Subject 9",5,"0109",2016-07-17 15:55:53,94.482,74.82,0.5,0.792,0.08,7.81,NA,NA,154,37,NA,NA,0,2016-07-17 15:00:00,2016-07-17,126,5
		1529,"Subject 9",5,"0109",2016-07-17 16:23:53,96.483,80.562,0.5,0.835,0.01,7.82,NA,NA,1602,165,NA,NA,0,2016-07-17 16:00:00,2016-07-17,127,5
		1530,"Subject 9",5,"0109",2016-07-17 16:51:53,89.349,69.2085,0.4,0.774,0,7.82,NA,NA,1930,187,NA,NA,0,2016-07-17 16:00:00,2016-07-17,127,5
		1531,"Subject 9",5,"0109",2016-07-17 17:19:53,92.829,72.5145,0.4,0.781,0.07,7.89,NA,NA,2357,325,NA,NA,0,2016-07-17 17:00:00,2016-07-17,128,5
		1532,"Subject 9",5,"0109",2016-07-17 17:47:53,91.5675,76.647,0.4,0.837,0.1,7.99,NA,NA,931,122,NA,NA,0,2016-07-17 17:00:00,2016-07-17,128,5
		1533,"Subject 9",5,"0109",2016-07-17 18:15:53,127.542,108.7065,0.6,0.852,0.15,8.14,NA,NA,3018,1032,NA,NA,0,2016-07-17 18:00:00,2016-07-17,129,5
		1534,"Subject 9",5,"0109",2016-07-17 18:43:53,117.798,92.7855,0.6,0.788,-0.01,8.13,NA,NA,2871,566,NA,NA,0,2016-07-17 18:00:00,2016-07-17,129,5
		1535,"Subject 9",5,"0109",2016-07-17 19:11:53,112.3605,91.524,0.5,0.814,0.09,8.22,NA,NA,1503,229,NA,NA,0,2016-07-17 19:00:00,2016-07-17,130,5
		1536,"Subject 9",5,"0109",2016-07-17 19:39:53,121.452,101.7465,0.6,0.838,0.13,8.35,NA,NA,3708,1140,NA,NA,0,2016-07-17 19:00:00,2016-07-17,130,5
		1537,"Subject 9",5,"0109",2016-07-17 20:07:53,108.402,84.825,0.5,0.782,-0.01,8.34,NA,NA,702,78,NA,NA,0,2016-07-17 20:00:00,2016-07-17,131,5
		1538,"Subject 9",5,"0109",2016-07-17 20:35:53,130.326,108.663,0.6,0.834,0.19,8.53,NA,NA,3909,1520,NA,NA,0,2016-07-17 20:00:00,2016-07-17,131,5
		1539,"Subject 9",5,"0109",2016-07-17 21:03:53,125.4105,102.573,0.6,0.818,0.1,8.63,NA,NA,1261,416,NA,NA,0,2016-07-17 21:00:00,2016-07-17,132,5
		1540,"Subject 9",5,"0109",2016-07-17 21:31:53,123.4965,106.488,0.6,0.862,0.13,8.76,NA,NA,3681,1332,NA,NA,0,2016-07-17 21:00:00,2016-07-17,132,5
		1541,"Subject 9",5,"0109",2016-07-17 21:59:53,126.1935,100.0935,0.6,0.793,0.04,8.8,NA,NA,1771,459,NA,NA,0,2016-07-17 21:00:00,2016-07-17,132,5
		1542,"Subject 9",5,"0109",2016-07-17 22:27:53,106.0095,83.9985,0.5,0.792,0.1,8.9,NA,NA,1931,551,NA,NA,0,2016-07-17 22:00:00,2016-07-17,133,5
		1543,"Subject 9",5,"0109",2016-07-17 22:55:53,101.442,78.735,0.5,0.776,0,8.9,NA,NA,291,27,NA,NA,0,2016-07-17 22:00:00,2016-07-17,133,5
		1544,"Subject 9",5,"0109",2016-07-17 23:23:53,102.573,79.5615,0.5,0.776,0.01,8.91,NA,NA,1349,111,NA,NA,0,2016-07-17 23:00:00,2016-07-17,134,5
		1545,"Subject 9",5,"0109",2016-07-17 23:51:53,131.3265,105.096,0.6,0.8,0.07,8.98,NA,NA,1236,332,NA,NA,0,2016-07-17 23:00:00,2016-07-17,134,5
		1546,"Subject 9",5,"0109",2016-07-18 00:19:53,105.618,78.126,0.5,0.74,0,8.98,NA,NA,1010,96,NA,NA,0,2016-07-18 00:00:00,2016-07-18,135,6
		1547,"Subject 9",5,"0109",2016-07-18 00:47:53,117.1455,89.697,0.6,0.766,0.12,9.1,NA,NA,459,104,NA,NA,0,2016-07-18 00:00:00,2016-07-18,135,6
		1548,"Subject 9",5,"0109",2016-07-18 01:15:53,99.0495,78.213,0.5,0.789,0,9.1,NA,NA,1208,15,NA,NA,0,2016-07-18 01:00:00,2016-07-18,136,6
		1549,"Subject 9",5,"0109",2016-07-18 01:43:53,113.0565,88.2615,0.5,0.781,0.06,9.16,NA,NA,2368,508,NA,NA,0,2016-07-18 01:00:00,2016-07-18,136,6
		1550,"Subject 9",5,"0109",2016-07-18 02:11:53,99.1365,73.6455,0.5,0.743,-0.01,9.15,NA,NA,1208,118,NA,NA,0,2016-07-18 02:00:00,2016-07-18,137,6
		1551,"Subject 9",5,"0109",2016-07-18 02:39:53,112.3605,84.8685,0.5,0.755,0,9.15,NA,NA,1633,392,NA,NA,0,2016-07-18 02:00:00,2016-07-18,137,6
		1552,"Subject 9",5,"0109",2016-07-18 03:07:53,113.796,83.868,0.5,0.737,-0.01,9.14,NA,NA,1641,194,NA,NA,0,2016-07-18 03:00:00,2016-07-18,138,6
		1553,"Subject 9",5,"0109",2016-07-18 03:35:53,97.2225,76.386,0.5,0.785,0.07,9.21,NA,NA,1296,37,NA,NA,0,2016-07-18 03:00:00,2016-07-18,138,6
		1554,"Subject 9",5,"0109",2016-07-18 04:03:53,107.4015,81.7365,0.5,0.761,0,9.21,NA,NA,1095,247,NA,NA,0,2016-07-18 04:00:00,2016-07-18,139,6
		1555,"Subject 9",5,"0109",2016-07-18 04:31:53,112.0995,91.6545,0.5,0.818,0.08,9.29,NA,NA,2026,398,NA,NA,0,2016-07-18 04:00:00,2016-07-18,139,6
		1556,"Subject 9",5,"0109",2016-07-18 04:59:53,130.1085,99.3975,0.6,0.764,0.09,9.38,NA,NA,1939,492,NA,NA,0,2016-07-18 04:00:00,2016-07-18,139,6
		1557,"Subject 9",5,"0109",2016-07-18 05:27:53,119.4945,97.7445,0.6,0.818,0.13,9.51,NA,NA,4349,1877,NA,NA,0,2016-07-18 05:00:00,2016-07-18,140,6
		1558,"Subject 9",5,"0109",2016-07-18 05:55:53,134.241,107.097,0.6,0.798,0.07,9.58,NA,NA,3435,1254,NA,NA,0,2016-07-18 05:00:00,2016-07-18,140,6
		1559,"Subject 9",5,"0109",2016-07-18 06:23:53,117.015,90.9585,0.6,0.778,0.01,9.59,NA,NA,1935,456,NA,NA,0,2016-07-18 06:00:00,2016-07-18,141,6
		1560,"Subject 9",5,"0109",2016-07-18 06:51:53,97.0485,72.4275,0.5,0.746,0,9.59,NA,NA,400,1,NA,NA,0,2016-07-18 06:00:00,2016-07-18,141,6
		1561,"Subject 9",5,"0109",2016-07-18 07:19:53,98.8755,74.7765,0.5,0.756,0.01,9.6,NA,NA,259,54,NA,NA,0,2016-07-18 07:00:00,2016-07-18,142,6
		1562,"Subject 9",5,"0109",2016-07-18 07:47:53,107.967,90.915,0.5,0.842,0.22,9.82,NA,NA,3036,1034,NA,NA,0,2016-07-18 07:00:00,2016-07-18,142,6
		1563,"Subject 9",5,"0109",2016-07-18 08:15:53,99.8325,80.1705,0.5,0.803,0.01,9.83,NA,NA,1383,113,NA,NA,0,2016-07-18 08:00:00,2016-07-18,143,6
		1564,"Subject 9",5,"0109",2016-07-18 08:43:53,90.7845,70.6875,0.4,0.778,0,9.83,NA,NA,226,37,NA,NA,0,2016-07-18 08:00:00,2016-07-18,143,6
		1565,"Subject 9",5,"0109",2016-07-18 09:11:53,97.5705,74.2545,0.5,0.761,0,9.83,NA,NA,640,53,NA,NA,0,2016-07-18 09:00:00,2016-07-18,144,6
		1566,"Subject 9",5,"0109",2016-07-18 09:39:53,91.263,68.9475,0.4,0.756,0.01,9.84,NA,NA,1627,382,NA,NA,0,2016-07-18 09:00:00,2016-07-18,144,6
		1567,"Subject 9",5,"0109",2016-07-18 10:07:53,92.6985,70.5135,0.4,0.761,0,9.84,NA,NA,307,27,NA,NA,0,2016-07-18 10:00:00,2016-07-18,145,6
		1568,"Subject 9",5,"0109",2016-07-18 10:35:53,120.321,92.829,0.6,0.771,0.01,9.85,NA,NA,157,14,NA,NA,0,2016-07-18 10:00:00,2016-07-18,145,6
		1569,"Subject 9",5,"0109",NA,0,0,0,0,0,0,NA,NA,0,0,NA,NA,0,NA,NA,NA,NA
		1570,"Subject 9",5,NA,NA,NA,NA,NA,NA,NA,NA,NA,NA,NA,NA,NA,NA,NA,NA,NA,NA,NA
		1571,"Subject 10",6,"0110",2016-07-12 09:29:53,151.188,113.821,0.7,0.753,0,0,NA,NA,4193,1908,NA,NA,0,2016-07-12 09:00:00,2016-07-12,0,0
		1572,"Subject 10",6,"0110",2016-07-12 09:57:53,125.904,93.998,0.6,0.747,0.14,0.14,NA,NA,4238,1943,NA,NA,0,2016-07-12 09:00:00,2016-07-12,0,0
		1573,"Subject 10",6,"0110",2016-07-12 10:25:53,132.698,98.513,0.6,0.742,-0.02,0.12,NA,NA,3967,1680,NA,NA,0,2016-07-12 10:00:00,2016-07-12,1,0
		1574,"Subject 10",6,"0110",2016-07-12 10:53:53,125.13,95.761,0.6,0.765,-0.01,0.11,NA,NA,2696,781,NA,NA,0,2016-07-12 10:00:00,2016-07-12,1,0
		1575,"Subject 10",6,"0110",2016-07-12 11:21:53,127.796,97.309,0.6,0.761,-0.02,0.09,NA,NA,2975,1226,NA,NA,0,2016-07-12 11:00:00,2016-07-12,2,0
		1576,"Subject 10",6,"0110",2016-07-12 11:49:53,111.585,86.129,0.5,0.772,0,0.09,NA,NA,2295,703,NA,NA,0,2016-07-12 11:00:00,2016-07-12,2,0
		1577,"Subject 10",6,"0110",2016-07-12 12:17:53,116.014,87.161,0.5,0.751,-0.01,0.08,NA,NA,3702,1706,NA,NA,0,2016-07-12 12:00:00,2016-07-12,3,0
		1578,"Subject 10",6,"0110",2016-07-12 12:45:53,119.11,89.526,0.6,0.752,-0.01,0.07,NA,NA,2419,911,NA,NA,0,2016-07-12 12:00:00,2016-07-12,3,0
		1579,"Subject 10",6,"0110",2016-07-12 13:13:53,103.071,77.228,0.5,0.749,0,0.07,NA,NA,1203,283,NA,NA,0,2016-07-12 13:00:00,2016-07-12,4,0
		1580,"Subject 10",6,"0110",2016-07-12 13:41:53,102.082,74.949,0.5,0.734,0,0.07,NA,NA,736,79,NA,NA,0,2016-07-12 13:00:00,2016-07-12,4,0
		1581,"Subject 10",6,"0110",2016-07-12 14:09:53,99.459,73.96,0.5,0.744,0,0.07,NA,NA,1442,110,NA,NA,0,2016-07-12 14:00:00,2016-07-12,5,0
		1582,"Subject 10",6,"0110",2016-07-12 14:37:53,98.513,73.401,0.5,0.745,-0.01,0.06,NA,NA,1282,84,NA,NA,0,2016-07-12 14:00:00,2016-07-12,5,0
		1583,"Subject 10",6,"0110",2016-07-12 15:05:53,113.219,87.892,0.5,0.776,0.01,0.07,NA,NA,1087,228,NA,NA,0,2016-07-12 15:00:00,2016-07-12,6,0
		1584,"Subject 10",6,"0110",2016-07-12 15:33:53,105.006,79.335,0.5,0.755,-0.01,0.06,NA,NA,654,136,NA,NA,0,2016-07-12 15:00:00,2016-07-12,6,0
		1585,"Subject 10",6,"0110",2016-07-12 16:01:53,96.836,73.358,0.5,0.757,0.01,0.07,NA,NA,1044,50,NA,NA,0,2016-07-12 16:00:00,2016-07-12,7,0
		1586,"Subject 10",6,"0110",2016-07-12 16:29:53,99.201,76.411,0.5,0.77,0,0.07,NA,NA,460,24,NA,NA,0,2016-07-12 16:00:00,2016-07-12,7,0
		1587,"Subject 10",6,"0110",2016-07-12 16:57:53,104.447,81.743,0.5,0.783,-0.01,0.06,NA,NA,1060,141,NA,NA,0,2016-07-12 16:00:00,2016-07-12,7,0
		1588,"Subject 10",6,"0110",2016-07-12 17:25:53,102.125,78.432,0.5,0.768,0,0.06,NA,NA,708,111,NA,NA,0,2016-07-12 17:00:00,2016-07-12,8,0
		1589,"Subject 10",6,"0110",2016-07-12 17:53:53,102.34,77.4,0.5,0.756,0.04,0.1,NA,NA,880,47,NA,NA,0,2016-07-12 17:00:00,2016-07-12,8,0
		1590,"Subject 10",6,"0110",2016-07-12 18:21:53,98.427,72.799,0.5,0.74,0,0.1,NA,NA,1955,439,NA,NA,0,2016-07-12 18:00:00,2016-07-12,9,0
		1591,"Subject 10",6,"0110",2016-07-12 18:49:53,119.411,93.783,0.6,0.785,0,0.1,NA,NA,1270,254,NA,NA,0,2016-07-12 18:00:00,2016-07-12,9,0
		1592,"Subject 10",6,"0110",2016-07-12 19:17:53,107.543,82.13,0.5,0.764,0,0.1,NA,NA,1426,203,NA,NA,0,2016-07-12 19:00:00,2016-07-12,10,0
		1593,"Subject 10",6,"0110",2016-07-12 19:45:53,145.383,111.112,0.7,0.764,0.06,0.16,NA,NA,4521,2020,NA,NA,0,2016-07-12 19:00:00,2016-07-12,10,0
		1594,"Subject 10",6,"0110",2016-07-12 20:13:53,108.403,79.636,0.5,0.735,0,0.16,NA,NA,1764,195,NA,NA,0,2016-07-12 20:00:00,2016-07-12,11,0
		1595,"Subject 10",6,"0110",2016-07-12 20:41:53,141.857,111.069,0.7,0.783,0.23,0.39,NA,NA,4261,2029,NA,NA,0,2016-07-12 20:00:00,2016-07-12,11,0
		1596,"Subject 10",6,"0110",2016-07-12 21:09:53,124.786,99.244,0.6,0.795,0.01,0.4,NA,NA,1687,316,NA,NA,0,2016-07-12 21:00:00,2016-07-12,12,0
		1597,"Subject 10",6,"0110",2016-07-12 21:37:53,145.254,112.961,0.7,0.778,0.04,0.44,NA,NA,5414,2724,NA,NA,0,2016-07-12 21:00:00,2016-07-12,12,0
		1598,"Subject 10",6,"0110",2016-07-12 22:05:53,105.135,77.228,0.5,0.734,-0.01,0.43,NA,NA,2729,510,NA,NA,0,2016-07-12 22:00:00,2016-07-12,13,0
		1599,"Subject 10",6,"0110",2016-07-12 22:33:53,136.998,108.403,0.7,0.791,0.07,0.5,NA,NA,1981,660,NA,NA,0,2016-07-12 22:00:00,2016-07-12,13,0
		1600,"Subject 10",6,"0110",2016-07-12 23:01:53,121.26,99.631,0.6,0.822,0.11,0.61,NA,NA,4113,1786,NA,NA,0,2016-07-12 23:00:00,2016-07-12,14,0
		1601,"Subject 10",6,"0110",2016-07-12 23:29:53,125.044,99.76,0.6,0.798,0.05,0.66,NA,NA,1219,328,NA,NA,0,2016-07-12 23:00:00,2016-07-12,14,0
		1602,"Subject 10",6,"0110",2016-07-12 23:57:53,105.651,80.668,0.5,0.763,0.06,0.72,NA,NA,1714,369,NA,NA,0,2016-07-12 23:00:00,2016-07-12,14,0
		1603,"Subject 10",6,"0110",2016-07-13 00:25:53,105.565,82.99,0.5,0.786,0.11,0.83,NA,NA,1125,167,NA,NA,0,2016-07-13 00:00:00,2016-07-13,15,1
		1604,"Subject 10",6,"0110",2016-07-13 00:53:53,108.403,88.021,0.5,0.812,0.04,0.87,NA,NA,1021,210,NA,NA,0,2016-07-13 00:00:00,2016-07-13,15,1
		1605,"Subject 10",6,"0110",2016-07-13 01:21:53,108.36,84.022,0.5,0.776,0.04,0.91,NA,NA,1830,271,NA,NA,0,2016-07-13 01:00:00,2016-07-13,16,1
		1606,"Subject 10",6,"0110",2016-07-13 01:49:53,110.338,89.569,0.5,0.812,0.08,0.99,NA,NA,1512,174,NA,NA,0,2016-07-13 01:00:00,2016-07-13,16,1
		1607,"Subject 10",6,"0110",2016-07-13 02:17:53,109.005,83.076,0.5,0.762,0,0.99,NA,NA,1090,23,NA,NA,0,2016-07-13 02:00:00,2016-07-13,17,1
		1608,"Subject 10",6,"0110",2016-07-13 02:45:53,105.78,84.882,0.5,0.802,0.08,1.07,NA,NA,1095,90,NA,NA,0,2016-07-13 02:00:00,2016-07-13,17,1
		1609,"Subject 10",6,"0110",2016-07-13 03:13:53,119.411,99.588,0.6,0.834,0.07,1.14,NA,NA,1345,236,NA,NA,0,2016-07-13 03:00:00,2016-07-13,18,1
		1610,"Subject 10",6,"0110",2016-07-13 03:41:53,111.284,87.849,0.5,0.789,0.05,1.19,NA,NA,936,69,NA,NA,0,2016-07-13 03:00:00,2016-07-13,18,1
		1611,"Subject 10",6,"0110",2016-07-13 04:09:53,103.286,83.463,0.5,0.808,0.04,1.23,NA,NA,887,74,NA,NA,0,2016-07-13 04:00:00,2016-07-13,19,1
		1612,"Subject 10",6,"0110",2016-07-13 04:37:53,140.696,113.434,0.7,0.806,0.09,1.32,NA,NA,2967,922,NA,NA,0,2016-07-13 04:00:00,2016-07-13,19,1
		1613,"Subject 10",6,"0110",2016-07-13 05:05:53,106.554,80.969,0.5,0.76,0,1.32,NA,NA,889,46,NA,NA,0,2016-07-13 05:00:00,2016-07-13,20,1
		1614,"Subject 10",6,"0110",2016-07-13 05:33:53,141.298,109.951,0.7,0.778,0.05,1.37,NA,NA,3679,1526,NA,NA,0,2016-07-13 05:00:00,2016-07-13,20,1
		1615,"Subject 10",6,"0110",2016-07-13 06:01:53,101.05,74.906,0.5,0.741,0.01,1.38,NA,NA,2441,755,NA,NA,0,2016-07-13 06:00:00,2016-07-13,21,1
		1616,"Subject 10",6,"0110",2016-07-13 06:29:53,108.016,80.023,0.5,0.741,0.01,1.39,NA,NA,2918,1111,NA,NA,0,2016-07-13 06:00:00,2016-07-13,21,1
		1617,"Subject 10",6,"0110",2016-07-13 06:57:53,99.244,74.949,0.5,0.755,0.01,1.4,NA,NA,205,22,NA,NA,0,2016-07-13 06:00:00,2016-07-13,21,1
		1618,"Subject 10",6,"0110",2016-07-13 07:25:53,103.501,78.26,0.5,0.756,0.04,1.44,NA,NA,602,83,NA,NA,0,2016-07-13 07:00:00,2016-07-13,22,1
		1619,"Subject 10",6,"0110",2016-07-13 07:53:53,108.618,84.882,0.5,0.782,0.04,1.48,NA,NA,2597,807,NA,NA,0,2016-07-13 07:00:00,2016-07-13,22,1
		1620,"Subject 10",6,"0110",2016-07-13 08:21:53,102.77,77.959,0.5,0.758,0.01,1.49,NA,NA,693,21,NA,NA,0,2016-07-13 08:00:00,2016-07-13,23,1
		1621,"Subject 10",6,"0110",2016-07-13 08:49:53,111.026,89.483,0.5,0.806,0.06,1.55,NA,NA,1460,179,NA,NA,0,2016-07-13 08:00:00,2016-07-13,23,1
		1622,"Subject 10",6,"0110",2016-07-13 09:17:53,99.459,76.411,0.5,0.768,0.01,1.56,NA,NA,403,16,NA,NA,0,2016-07-13 09:00:00,2016-07-13,24,1
		1623,"Subject 10",6,"0110",2016-07-13 09:45:53,109.951,90.128,0.5,0.82,0.17,1.73,NA,NA,1163,171,NA,NA,0,2016-07-13 09:00:00,2016-07-13,24,1
		1624,"Subject 10",6,"0110",2016-07-13 10:13:53,102.512,81.571,0.5,0.796,0.01,1.74,NA,NA,2008,464,NA,NA,0,2016-07-13 10:00:00,2016-07-13,25,1
		1625,"Subject 10",6,"0110",2016-07-13 10:41:53,94.471,71.939,0.4,0.761,0.01,1.75,NA,NA,1448,94,NA,NA,0,2016-07-13 10:00:00,2016-07-13,25,1
		1626,"Subject 10",6,"0110",2016-07-13 11:09:53,100.276,78.389,0.5,0.782,0.1,1.85,NA,NA,1558,56,NA,NA,0,2016-07-13 11:00:00,2016-07-13,26,1
		1627,"Subject 10",6,"0110",2016-07-13 11:37:53,113.778,91.074,0.5,0.8,0.03,1.88,NA,NA,3258,788,NA,NA,0,2016-07-13 11:00:00,2016-07-13,26,1
		1628,"Subject 10",6,"0110",2016-07-13 12:05:53,101.953,77.142,0.5,0.757,0,1.88,NA,NA,1068,29,NA,NA,0,2016-07-13 12:00:00,2016-07-13,27,1
		1629,"Subject 10",6,"0110",2016-07-13 12:33:53,104.49,84.71,0.5,0.811,0.1,1.98,NA,NA,1266,108,NA,NA,0,2016-07-13 12:00:00,2016-07-13,27,1
		1630,"Subject 10",6,"0110",2016-07-13 13:01:53,111.757,95.374,0.5,0.854,0.01,1.99,NA,NA,1027,141,NA,NA,0,2016-07-13 13:00:00,2016-07-13,28,1
		1631,"Subject 10",6,"0110",2016-07-13 13:29:53,103.071,81.098,0.5,0.787,0.02,2.01,NA,NA,777,66,NA,NA,0,2016-07-13 13:00:00,2016-07-13,28,1
		1632,"Subject 10",6,"0110",2016-07-13 13:57:53,101.695,79.249,0.5,0.779,0,2.01,NA,NA,219,35,NA,NA,0,2016-07-13 13:00:00,2016-07-13,28,1
		1633,"Subject 10",6,"0110",2016-07-13 14:25:53,110.596,88.365,0.5,0.799,0.01,2.02,NA,NA,1668,486,NA,NA,0,2016-07-13 14:00:00,2016-07-13,29,1
		1634,"Subject 10",6,"0110",2016-07-13 14:53:53,76.067,57.19,0.4,0.751,0,2.02,NA,NA,933,223,NA,NA,0,2016-07-13 14:00:00,2016-07-13,29,1
		1635,"Subject 10",6,"0110",2016-07-13 15:21:53,119.024,89.569,0.6,0.752,-0.01,2.01,NA,NA,455,81,NA,NA,0,2016-07-13 15:00:00,2016-07-13,30,1
		1636,"Subject 10",6,"0110",2016-07-13 15:49:53,102.598,79.98,0.5,0.78,0.01,2.02,NA,NA,529,84,NA,NA,0,2016-07-13 15:00:00,2016-07-13,30,1
		1637,"Subject 10",6,"0110",2016-07-13 16:17:53,99.803,76.669,0.5,0.768,0,2.02,NA,NA,515,71,NA,NA,0,2016-07-13 16:00:00,2016-07-13,31,1
		1638,"Subject 10",6,"0110",2016-07-13 16:45:53,99.631,75.465,0.5,0.757,0,2.02,NA,NA,1077,61,NA,NA,0,2016-07-13 16:00:00,2016-07-13,31,1
		1639,"Subject 10",6,"0110",2016-07-13 17:13:53,101.996,77.873,0.5,0.763,0,2.02,NA,NA,1079,40,NA,NA,0,2016-07-13 17:00:00,2016-07-13,32,1
		1640,"Subject 10",6,"0110",2016-07-13 17:41:53,100.792,75.981,0.5,0.754,0.01,2.03,NA,NA,217,18,NA,NA,0,2016-07-13 17:00:00,2016-07-13,32,1
		1641,"Subject 10",6,"0110",2016-07-13 18:09:53,111.241,87.204,0.5,0.784,0,2.03,NA,NA,1386,367,NA,NA,0,2016-07-13 18:00:00,2016-07-13,33,1
		1642,"Subject 10",6,"0110",2016-07-13 18:37:53,105.694,80.066,0.5,0.757,0,2.03,NA,NA,410,40,NA,NA,0,2016-07-13 18:00:00,2016-07-13,33,1
		1643,"Subject 10",6,"0110",2016-07-13 19:05:53,121.346,92.321,0.6,0.761,0.01,2.04,NA,NA,1355,331,NA,NA,0,2016-07-13 19:00:00,2016-07-13,34,1
		1644,"Subject 10",6,"0110",2016-07-13 19:33:53,111.413,84.624,0.5,0.76,0.03,2.07,NA,NA,647,152,NA,NA,0,2016-07-13 19:00:00,2016-07-13,34,1
		1645,"Subject 10",6,"0110",2016-07-13 20:01:53,113.176,86.129,0.5,0.761,0.03,2.1,NA,NA,1087,242,NA,NA,0,2016-07-13 20:00:00,2016-07-13,35,1
		1646,"Subject 10",6,"0110",2016-07-13 20:29:53,136.912,105.049,0.7,0.767,0.02,2.12,NA,NA,2000,520,NA,NA,0,2016-07-13 20:00:00,2016-07-13,35,1
		1647,"Subject 10",6,"0110",2016-07-13 20:57:53,121.346,93.009,0.6,0.766,0,2.12,NA,NA,1061,141,NA,NA,0,2016-07-13 20:00:00,2016-07-13,35,1
		1648,"Subject 10",6,"0110",2016-07-13 21:25:53,138.503,105.909,0.7,0.765,0,2.12,NA,NA,2486,829,NA,NA,0,2016-07-13 21:00:00,2016-07-13,36,1
		1649,"Subject 10",6,"0110",2016-07-13 21:53:53,122.12,92.321,0.6,0.756,0.01,2.13,NA,NA,3129,996,NA,NA,0,2016-07-13 21:00:00,2016-07-13,36,1
		1650,"Subject 10",6,"0110",2016-07-13 22:21:53,107.414,80.926,0.5,0.753,0.01,2.14,NA,NA,1335,39,NA,NA,0,2016-07-13 22:00:00,2016-07-13,37,1
		1651,"Subject 10",6,"0110",2016-07-13 22:49:53,138.847,108.317,0.7,0.78,0.08,2.22,NA,NA,2794,1023,NA,NA,0,2016-07-13 22:00:00,2016-07-13,37,1
		1652,"Subject 10",6,"0110",2016-07-13 23:17:53,123.152,94.557,0.6,0.768,0,2.22,NA,NA,3029,848,NA,NA,0,2016-07-13 23:00:00,2016-07-13,38,1
		1653,"Subject 10",6,"0110",2016-07-13 23:45:53,104.791,78.217,0.5,0.746,0.01,2.23,NA,NA,904,133,NA,NA,0,2016-07-13 23:00:00,2016-07-13,38,1
		1654,"Subject 10",6,"0110",2016-07-14 00:13:53,130.333,101.695,0.6,0.78,0.09,2.32,NA,NA,1221,291,NA,NA,0,2016-07-14 00:00:00,2016-07-14,39,2
		1655,"Subject 10",6,"0110",2016-07-14 00:41:53,143.706,110.037,0.7,0.766,0.04,2.36,NA,NA,2589,612,NA,NA,0,2016-07-14 00:00:00,2016-07-14,39,2
		1656,"Subject 10",6,"0110",2016-07-14 01:09:53,115.197,85.828,0.5,0.745,0,2.36,NA,NA,1085,97,NA,NA,0,2016-07-14 01:00:00,2016-07-14,40,2
		1657,"Subject 10",6,"0110",2016-07-14 01:37:53,125.603,95.718,0.6,0.762,0.04,2.4,NA,NA,941,101,NA,NA,0,2016-07-14 01:00:00,2016-07-14,40,2
		1658,"Subject 10",6,"0110",2016-07-14 02:05:53,109.435,81.356,0.5,0.743,0,2.4,NA,NA,956,94,NA,NA,0,2016-07-14 02:00:00,2016-07-14,41,2
		1659,"Subject 10",6,"0110",2016-07-14 02:33:53,119.325,89.311,0.6,0.748,0.13,2.53,NA,NA,1173,80,NA,NA,0,2016-07-14 02:00:00,2016-07-14,41,2
		1660,"Subject 10",6,"0110",2016-07-14 03:01:53,112.832,90.386,0.5,0.801,0,2.53,NA,NA,1315,140,NA,NA,0,2016-07-14 03:00:00,2016-07-14,42,2
		1661,"Subject 10",6,"0110",2016-07-14 03:29:53,121.432,94.643,0.6,0.779,0.07,2.6,NA,NA,1066,104,NA,NA,0,2016-07-14 03:00:00,2016-07-14,42,2
		1662,"Subject 10",6,"0110",2016-07-14 03:57:53,107.457,80.754,0.5,0.752,0,2.6,NA,NA,740,81,NA,NA,0,2016-07-14 03:00:00,2016-07-14,42,2
		1663,"Subject 10",6,"0110",2016-07-14 04:25:53,111.671,83.635,0.5,0.749,0,2.6,NA,NA,1291,109,NA,NA,0,2016-07-14 04:00:00,2016-07-14,43,2
		1664,"Subject 10",6,"0110",2016-07-14 04:53:53,156.563,122.722,0.7,0.784,0.1,2.7,NA,NA,4683,1976,NA,NA,0,2016-07-14 04:00:00,2016-07-14,43,2
		1665,"Subject 10",6,"0110",2016-07-14 05:21:53,131.967,99.201,0.6,0.752,0.02,2.72,NA,NA,3618,1230,NA,NA,0,2016-07-14 05:00:00,2016-07-14,44,2
		1666,"Subject 10",6,"0110",2016-07-14 05:49:53,117.089,86.645,0.6,0.74,-0.01,2.71,NA,NA,2241,284,NA,NA,0,2016-07-14 05:00:00,2016-07-14,44,2
		1667,"Subject 10",6,"0110",2016-07-14 06:17:53,109.263,81.055,0.5,0.742,0,2.71,NA,NA,287,32,NA,NA,0,2016-07-14 06:00:00,2016-07-14,45,2
		1668,"Subject 10",6,"0110",2016-07-14 06:45:53,103.974,77.959,0.5,0.75,0.05,2.76,NA,NA,1326,368,NA,NA,0,2016-07-14 06:00:00,2016-07-14,45,2
		1669,"Subject 10",6,"0110",2016-07-14 07:13:53,99.932,76.712,0.5,0.768,0.04,2.8,NA,NA,791,89,NA,NA,0,2016-07-14 07:00:00,2016-07-14,46,2
		1670,"Subject 10",6,"0110",2016-07-14 07:41:53,93.826,69.058,0.4,0.736,0,2.8,NA,NA,730,40,NA,NA,0,2016-07-14 07:00:00,2016-07-14,46,2
		1671,"Subject 10",6,"0110",2016-07-14 08:09:53,104.275,82.56,0.5,0.792,0.08,2.88,NA,NA,1040,136,NA,NA,0,2016-07-14 08:00:00,2016-07-14,47,2
		1672,"Subject 10",6,"0110",2016-07-14 08:37:53,104.92,78.604,0.5,0.749,0,2.88,NA,NA,762,63,NA,NA,0,2016-07-14 08:00:00,2016-07-14,47,2
		1673,"Subject 10",6,"0110",2016-07-14 09:05:53,104.662,78.045,0.5,0.746,0.01,2.89,NA,NA,791,99,NA,NA,0,2016-07-14 09:00:00,2016-07-14,48,2
		1674,"Subject 10",6,"0110",2016-07-14 09:33:53,106.726,81.184,0.5,0.761,0,2.89,NA,NA,812,75,NA,NA,0,2016-07-14 09:00:00,2016-07-14,48,2
		1675,"Subject 10",6,"0110",2016-07-14 10:01:53,118.508,89.612,0.6,0.756,0,2.89,NA,NA,2382,597,NA,NA,0,2016-07-14 10:00:00,2016-07-14,49,2
		1676,"Subject 10",6,"0110",2016-07-14 10:29:53,101.05,75.293,0.5,0.745,0,2.89,NA,NA,755,65,NA,NA,0,2016-07-14 10:00:00,2016-07-14,49,2
		1677,"Subject 10",6,"0110",2016-07-14 10:57:53,101.738,74.82,0.5,0.735,0.01,2.9,NA,NA,1155,68,NA,NA,0,2016-07-14 10:00:00,2016-07-14,49,2
		1678,"Subject 10",6,"0110",2016-07-14 11:25:53,115.756,92.493,0.6,0.799,0.07,2.97,NA,NA,1155,96,NA,NA,0,2016-07-14 11:00:00,2016-07-14,50,2
		1679,"Subject 10",6,"0110",2016-07-14 11:53:53,98.384,75.035,0.5,0.763,0,2.97,NA,NA,522,69,NA,NA,0,2016-07-14 11:00:00,2016-07-14,50,2
		1680,"Subject 10",6,"0110",2016-07-14 12:21:53,97.911,74.777,0.5,0.763,0,2.97,NA,NA,538,39,NA,NA,0,2016-07-14 12:00:00,2016-07-14,51,2
		1681,"Subject 10",6,"0110",2016-07-14 12:49:53,106.941,82.689,0.5,0.773,0.09,3.06,NA,NA,530,93,NA,NA,0,2016-07-14 12:00:00,2016-07-14,51,2
		1682,"Subject 10",6,"0110",2016-07-14 13:17:53,106.339,82.216,0.5,0.773,0,3.06,NA,NA,2298,616,NA,NA,0,2016-07-14 13:00:00,2016-07-14,52,2
		1683,"Subject 10",6,"0110",2016-07-14 13:45:53,45.537,32.207,0.2,0.707,0.01,3.07,NA,NA,1210,255,NA,NA,0,2016-07-14 13:00:00,2016-07-14,52,2
		1684,"Subject 10",6,"0110",2016-07-14 14:13:53,116.186,86.774,0.6,0.747,0,3.07,NA,NA,786,42,NA,NA,0,2016-07-14 14:00:00,2016-07-14,53,2
		1685,"Subject 10",6,"0110",2016-07-14 14:41:53,109.564,82.861,0.5,0.756,0,3.07,NA,NA,363,38,NA,NA,0,2016-07-14 14:00:00,2016-07-14,53,2
		1686,"Subject 10",6,"0110",2016-07-14 15:09:53,105.049,78.432,0.5,0.747,0,3.07,NA,NA,709,82,NA,NA,0,2016-07-14 15:00:00,2016-07-14,54,2
		1687,"Subject 10",6,"0110",2016-07-14 15:37:53,108.231,82.001,0.5,0.758,0,3.07,NA,NA,1638,147,NA,NA,0,2016-07-14 15:00:00,2016-07-14,54,2
		1688,"Subject 10",6,"0110",2016-07-14 16:05:53,102.426,77.443,0.5,0.756,0,3.07,NA,NA,605,45,NA,NA,0,2016-07-14 16:00:00,2016-07-14,55,2
		1689,"Subject 10",6,"0110",2016-07-14 16:33:53,106.769,80.367,0.5,0.753,0,3.07,NA,NA,1109,104,NA,NA,0,2016-07-14 16:00:00,2016-07-14,55,2
		1690,"Subject 10",6,"0110",2016-07-14 17:01:53,109.005,81.485,0.5,0.747,0,3.07,NA,NA,841,120,NA,NA,0,2016-07-14 17:00:00,2016-07-14,56,2
		1691,"Subject 10",6,"0110",2016-07-14 17:29:53,105.006,80.109,0.5,0.763,0,3.07,NA,NA,1236,29,NA,NA,0,2016-07-14 17:00:00,2016-07-14,56,2
		1692,"Subject 10",6,"0110",2016-07-14 17:57:53,109.091,81.184,0.5,0.744,0,3.07,NA,NA,571,28,NA,NA,0,2016-07-14 17:00:00,2016-07-14,56,2
		1693,"Subject 10",6,"0110",2016-07-14 18:25:53,130.118,97.954,0.6,0.753,0.01,3.08,NA,NA,2287,549,NA,NA,0,2016-07-14 18:00:00,2016-07-14,57,2
		1694,"Subject 10",6,"0110",2016-07-14 18:53:53,110.424,81.915,0.5,0.742,0,3.08,NA,NA,2015,298,NA,NA,0,2016-07-14 18:00:00,2016-07-14,57,2
		1695,"Subject 10",6,"0110",2016-07-14 19:21:53,123.367,93.912,0.6,0.761,0.02,3.1,NA,NA,966,141,NA,NA,0,2016-07-14 19:00:00,2016-07-14,58,2
		1696,"Subject 10",6,"0110",2016-07-14 19:49:53,145.641,113.176,0.7,0.777,0.09,3.19,NA,NA,2269,854,NA,NA,0,2016-07-14 19:00:00,2016-07-14,58,2
		1697,"Subject 10",6,"0110",2016-07-14 20:17:53,130.763,99.975,0.6,0.765,0.01,3.2,NA,NA,3255,886,NA,NA,0,2016-07-14 20:00:00,2016-07-14,59,2
		1698,"Subject 10",6,"0110",2016-07-14 20:45:53,113.305,85.097,0.5,0.751,0,3.2,NA,NA,1001,80,NA,NA,0,2016-07-14 20:00:00,2016-07-14,59,2
		1699,"Subject 10",6,"0110",2016-07-14 21:13:53,113.348,85.097,0.5,0.751,0.08,3.28,NA,NA,1492,49,NA,NA,0,2016-07-14 21:00:00,2016-07-14,60,2
		1700,"Subject 10",6,"0110",2016-07-14 21:41:53,143.104,114.165,0.7,0.798,0.08,3.36,NA,NA,2898,1130,NA,NA,0,2016-07-14 21:00:00,2016-07-14,60,2
		1701,"Subject 10",6,"0110",2016-07-14 22:09:53,132.999,103.071,0.6,0.775,0.07,3.43,NA,NA,3687,1267,NA,NA,0,2016-07-14 22:00:00,2016-07-14,61,2
		1702,"Subject 10",6,"0110",2016-07-14 22:37:53,115.068,84.624,0.5,0.735,0,3.43,NA,NA,2046,296,NA,NA,0,2016-07-14 22:00:00,2016-07-14,61,2
		1703,"Subject 10",6,"0110",2016-07-14 23:05:53,109.349,80.883,0.5,0.74,0,3.43,NA,NA,356,15,NA,NA,0,2016-07-14 23:00:00,2016-07-14,62,2
		1704,"Subject 10",6,"0110",2016-07-14 23:33:53,113.305,87.032,0.5,0.768,0.07,3.5,NA,NA,1831,349,NA,NA,0,2016-07-14 23:00:00,2016-07-14,62,2
		1705,"Subject 10",6,"0110",2016-07-15 00:01:53,104.06,76.97,0.5,0.74,0.01,3.51,NA,NA,1244,56,NA,NA,0,2016-07-15 00:00:00,2016-07-15,63,3
		1706,"Subject 10",6,"0110",2016-07-15 00:29:53,113.563,86.731,0.5,0.764,0.01,3.52,NA,NA,1023,72,NA,NA,0,2016-07-15 00:00:00,2016-07-15,63,3
		1707,"Subject 10",6,"0110",2016-07-15 00:57:53,120.4,92.794,0.6,0.771,0,3.52,NA,NA,1212,185,NA,NA,0,2016-07-15 00:00:00,2016-07-15,63,3
		1708,"Subject 10",6,"0110",2016-07-15 01:25:53,112.316,83.334,0.5,0.742,0.05,3.57,NA,NA,3031,594,NA,NA,0,2016-07-15 01:00:00,2016-07-15,64,3
		1709,"Subject 10",6,"0110",2016-07-15 01:53:53,105.307,76.884,0.5,0.73,0,3.57,NA,NA,407,41,NA,NA,0,2016-07-15 01:00:00,2016-07-15,64,3
		1710,"Subject 10",6,"0110",2016-07-15 02:21:53,113.09,86,0.5,0.761,0.06,3.63,NA,NA,715,104,NA,NA,0,2016-07-15 02:00:00,2016-07-15,65,3
		1711,"Subject 10",6,"0110",2016-07-15 02:49:53,126.377,96.234,0.6,0.762,0.03,3.66,NA,NA,1403,161,NA,NA,0,2016-07-15 02:00:00,2016-07-15,65,3
		1712,"Subject 10",6,"0110",2016-07-15 03:17:53,104.189,78.905,0.5,0.757,0.01,3.67,NA,NA,975,140,NA,NA,0,2016-07-15 03:00:00,2016-07-15,66,3
		1713,"Subject 10",6,"0110",2016-07-15 03:45:53,111.198,84.065,0.5,0.756,0.07,3.74,NA,NA,636,71,NA,NA,0,2016-07-15 03:00:00,2016-07-15,66,3
		1714,"Subject 10",6,"0110",2016-07-15 04:13:53,154.542,120.4,0.7,0.779,0.05,3.79,NA,NA,3406,1410,NA,NA,0,2016-07-15 04:00:00,2016-07-15,67,3
		1715,"Subject 10",6,"0110",2016-07-15 04:41:53,125.044,96.922,0.6,0.775,0.03,3.82,NA,NA,3434,937,NA,NA,0,2016-07-15 04:00:00,2016-07-15,67,3
		1716,"Subject 10",6,"0110",2016-07-15 05:09:53,110.295,82.388,0.5,0.747,0.01,3.83,NA,NA,1721,131,NA,NA,0,2016-07-15 05:00:00,2016-07-15,68,3
		1717,"Subject 10",6,"0110",2016-07-15 05:37:53,118.551,89.01,0.6,0.751,0.08,3.91,NA,NA,1394,277,NA,NA,0,2016-07-15 05:00:00,2016-07-15,68,3
		1718,"Subject 10",6,"0110",2016-07-15 06:05:53,104.232,78.002,0.5,0.748,0,3.91,NA,NA,980,136,NA,NA,0,2016-07-15 06:00:00,2016-07-15,69,3
		1719,"Subject 10",6,"0110",2016-07-15 06:33:53,103.243,81.141,0.5,0.786,0.07,3.98,NA,NA,722,70,NA,NA,0,2016-07-15 06:00:00,2016-07-15,69,3
		1720,"Subject 10",6,"0110",2016-07-15 07:01:53,99.846,75.938,0.5,0.761,0,3.98,NA,NA,1078,73,NA,NA,0,2016-07-15 07:00:00,2016-07-15,70,3
		1721,"Subject 10",6,"0110",2016-07-15 07:29:53,100.792,76.626,0.5,0.76,0,3.98,NA,NA,704,124,NA,NA,0,2016-07-15 07:00:00,2016-07-15,70,3
		1722,"Subject 10",6,"0110",2016-07-15 07:57:53,102.77,80.109,0.5,0.779,0.06,4.04,NA,NA,470,58,NA,NA,0,2016-07-15 07:00:00,2016-07-15,70,3
		1723,"Subject 10",6,"0110",2016-07-15 08:25:53,104.963,82.173,0.5,0.783,0.04,4.08,NA,NA,617,54,NA,NA,0,2016-07-15 08:00:00,2016-07-15,71,3
		1724,"Subject 10",6,"0110",2016-07-15 08:53:53,100.233,76.712,0.5,0.765,0.01,4.09,NA,NA,1665,85,NA,NA,0,2016-07-15 08:00:00,2016-07-15,71,3
		1725,"Subject 10",6,"0110",2016-07-15 09:21:53,133.429,104.877,0.6,0.786,0.03,4.12,NA,NA,2230,743,NA,NA,0,2016-07-15 09:00:00,2016-07-15,72,3
		1726,"Subject 10",6,"0110",2016-07-15 09:49:53,123.453,93.654,0.6,0.759,0,4.12,NA,NA,2818,733,NA,NA,0,2016-07-15 09:00:00,2016-07-15,72,3
		1727,"Subject 10",6,"0110",2016-07-15 10:17:53,98.556,73.831,0.5,0.749,0,4.12,NA,NA,365,22,NA,NA,0,2016-07-15 10:00:00,2016-07-15,73,3
		1728,"Subject 10",6,"0110",2016-07-15 10:45:53,101.738,79.98,0.5,0.786,0.06,4.18,NA,NA,684,64,NA,NA,0,2016-07-15 10:00:00,2016-07-15,73,3
		1729,"Subject 10",6,"0110",2016-07-15 11:13:53,142.416,110.08,0.7,0.773,0,4.18,NA,NA,1935,452,NA,NA,0,2016-07-15 11:00:00,2016-07-15,74,3
		1730,"Subject 10",6,"0110",2016-07-15 11:41:53,105.952,81.614,0.5,0.77,0,4.18,NA,NA,808,135,NA,NA,0,2016-07-15 11:00:00,2016-07-15,74,3
		1731,"Subject 10",6,"0110",2016-07-15 12:09:53,116.659,88.795,0.6,0.761,0,4.18,NA,NA,896,79,NA,NA,0,2016-07-15 12:00:00,2016-07-15,75,3
		1732,"Subject 10",6,"0110",2016-07-15 12:37:53,77.83,57.405,0.4,0.738,0.04,4.22,NA,NA,1356,363,NA,NA,0,2016-07-15 12:00:00,2016-07-15,75,3
		1733,"Subject 10",6,"0110",2016-07-15 13:05:53,110.209,83.248,0.5,0.755,0,4.22,NA,NA,573,69,NA,NA,0,2016-07-15 13:00:00,2016-07-15,76,3
		1734,"Subject 10",6,"0110",2016-07-15 13:33:53,100.405,74.347,0.5,0.741,0,4.22,NA,NA,1842,170,NA,NA,0,2016-07-15 13:00:00,2016-07-15,76,3
		1735,"Subject 10",6,"0110",2016-07-15 14:01:53,101.136,76.368,0.5,0.755,0,4.22,NA,NA,377,54,NA,NA,0,2016-07-15 14:00:00,2016-07-15,77,3
		1736,"Subject 10",6,"0110",2016-07-15 14:29:53,98.169,74.777,0.5,0.762,0,4.22,NA,NA,108,17,NA,NA,0,2016-07-15 14:00:00,2016-07-15,77,3
		1737,"Subject 10",6,"0110",2016-07-15 14:57:53,105.565,78.862,0.5,0.747,0.01,4.23,NA,NA,1713,238,NA,NA,0,2016-07-15 14:00:00,2016-07-15,77,3
		1738,"Subject 10",6,"0110",2016-07-15 15:25:53,99.803,75.25,0.5,0.754,0.01,4.24,NA,NA,197,26,NA,NA,0,2016-07-15 15:00:00,2016-07-15,78,3
		1739,"Subject 10",6,"0110",2016-07-15 15:53:53,100.491,75.465,0.5,0.751,0,4.24,NA,NA,686,19,NA,NA,0,2016-07-15 15:00:00,2016-07-15,78,3
		1740,"Subject 10",6,"0110",2016-07-15 16:21:53,108.661,82.56,0.5,0.76,0.05,4.29,NA,NA,1701,310,NA,NA,0,2016-07-15 16:00:00,2016-07-15,79,3
		1741,"Subject 10",6,"0110",2016-07-15 16:49:53,99.717,76.325,0.5,0.765,0.01,4.3,NA,NA,630,20,NA,NA,0,2016-07-15 16:00:00,2016-07-15,79,3
		1742,"Subject 10",6,"0110",2016-07-15 17:17:53,102.77,77.658,0.5,0.756,0.02,4.32,NA,NA,1275,138,NA,NA,0,2016-07-15 17:00:00,2016-07-15,80,3
		1743,"Subject 10",6,"0110",2016-07-15 17:45:53,102.254,78.131,0.5,0.764,0.02,4.34,NA,NA,1162,34,NA,NA,0,2016-07-15 17:00:00,2016-07-15,80,3
		1744,"Subject 10",6,"0110",2016-07-15 18:13:53,130.247,103.071,0.6,0.791,0.04,4.38,NA,NA,2235,728,NA,NA,0,2016-07-15 18:00:00,2016-07-15,81,3
		1745,"Subject 10",6,"0110",2016-07-15 18:41:53,122.335,96.363,0.6,0.788,0.04,4.42,NA,NA,3160,931,NA,NA,0,2016-07-15 18:00:00,2016-07-15,81,3
		1746,"Subject 10",6,"0110",2016-07-15 19:09:53,114.294,87.978,0.5,0.77,0.06,4.48,NA,NA,1175,129,NA,NA,0,2016-07-15 19:00:00,2016-07-15,82,3
		1747,"Subject 10",6,"0110",2016-07-15 19:37:53,106.984,84.28,0.5,0.788,0.04,4.52,NA,NA,1340,118,NA,NA,0,2016-07-15 19:00:00,2016-07-15,82,3
		1748,"Subject 10",6,"0110",2016-07-15 20:05:53,133.343,107.414,0.6,0.805,0.08,4.6,NA,NA,3822,1521,NA,NA,0,2016-07-15 20:00:00,2016-07-15,83,3
		1749,"Subject 10",6,"0110",2016-07-15 20:33:53,122.249,96.277,0.6,0.788,0.11,4.71,NA,NA,2964,875,NA,NA,0,2016-07-15 20:00:00,2016-07-15,83,3
		1750,"Subject 10",6,"0110",2016-07-15 21:01:53,125.259,100.19,0.6,0.8,0.12,4.83,NA,NA,1113,208,NA,NA,0,2016-07-15 21:00:00,2016-07-15,84,3
		1751,"Subject 10",6,"0110",2016-07-15 21:29:53,109.048,82.603,0.5,0.758,0,4.83,NA,NA,740,130,NA,NA,0,2016-07-15 21:00:00,2016-07-15,84,3
		1752,"Subject 10",6,"0110",2016-07-15 21:57:53,135.278,110.639,0.7,0.818,0.11,4.94,NA,NA,1555,470,NA,NA,0,2016-07-15 21:00:00,2016-07-15,84,3
		1753,"Subject 10",6,"0110",2016-07-15 22:25:53,110.811,85.484,0.5,0.771,0.1,5.04,NA,NA,2774,982,NA,NA,0,2016-07-15 22:00:00,2016-07-15,85,3
		1754,"Subject 10",6,"0110",2016-07-15 22:53:53,108.36,85.527,0.5,0.789,0.04,5.08,NA,NA,1309,209,NA,NA,0,2016-07-15 22:00:00,2016-07-15,85,3
		1755,"Subject 10",6,"0110",2016-07-15 23:21:53,113.563,87.376,0.5,0.769,-0.01,5.07,NA,NA,1116,132,NA,NA,0,2016-07-15 23:00:00,2016-07-15,86,3
		1756,"Subject 10",6,"0110",2016-07-15 23:49:53,105.479,83.377,0.5,0.79,0.07,5.14,NA,NA,1087,44,NA,NA,0,2016-07-15 23:00:00,2016-07-15,86,3
		1757,"Subject 10",6,"0110",2016-07-16 00:17:53,113.778,86.602,0.5,0.761,0.07,5.21,NA,NA,1510,222,NA,NA,0,2016-07-16 00:00:00,2016-07-16,87,4
		1758,"Subject 10",6,"0110",2016-07-16 00:45:53,116.272,89.526,0.6,0.77,0.05,5.26,NA,NA,1368,266,NA,NA,0,2016-07-16 00:00:00,2016-07-16,87,4
		1759,"Subject 10",6,"0110",2016-07-16 01:13:53,111.628,88.451,0.5,0.792,0.07,5.33,NA,NA,730,103,NA,NA,0,2016-07-16 01:00:00,2016-07-16,88,4
		1760,"Subject 10",6,"0110",2016-07-16 01:41:53,112.316,88.236,0.5,0.786,0,5.33,NA,NA,980,89,NA,NA,0,2016-07-16 01:00:00,2016-07-16,88,4
		1761,"Subject 10",6,"0110",2016-07-16 02:09:53,127.065,101.222,0.6,0.797,0.12,5.45,NA,NA,3448,1482,NA,NA,0,2016-07-16 02:00:00,2016-07-16,89,4
		1762,"Subject 10",6,"0110",2016-07-16 02:37:53,113.563,85.742,0.5,0.755,0,5.45,NA,NA,1917,391,NA,NA,0,2016-07-16 02:00:00,2016-07-16,89,4
		1763,"Subject 10",6,"0110",2016-07-16 03:05:53,108.79,86.215,0.5,0.792,0.06,5.51,NA,NA,943,194,NA,NA,0,2016-07-16 03:00:00,2016-07-16,90,4
		1764,"Subject 10",6,"0110",2016-07-16 03:33:53,114.079,89.096,0.5,0.781,0.03,5.54,NA,NA,1164,118,NA,NA,0,2016-07-16 03:00:00,2016-07-16,90,4
		1765,"Subject 10",6,"0110",2016-07-16 04:01:53,104.576,79.593,0.5,0.761,0,5.54,NA,NA,265,50,NA,NA,0,2016-07-16 04:00:00,2016-07-16,91,4
		1766,"Subject 10",6,"0110",2016-07-16 04:29:53,115.842,88.193,0.6,0.761,0,5.54,NA,NA,1612,211,NA,NA,0,2016-07-16 04:00:00,2016-07-16,91,4
		1767,"Subject 10",6,"0110",2016-07-16 04:57:53,129.129,101.05,0.6,0.782,0.1,5.64,NA,NA,1954,668,NA,NA,0,2016-07-16 04:00:00,2016-07-16,91,4
		1768,"Subject 10",6,"0110",2016-07-16 05:25:53,110.811,84.925,0.5,0.766,0.13,5.77,NA,NA,1484,461,NA,NA,0,2016-07-16 05:00:00,2016-07-16,92,4
		1769,"Subject 10",6,"0110",2016-07-16 05:53:53,102.985,80.109,0.5,0.778,0.01,5.78,NA,NA,1150,73,NA,NA,0,2016-07-16 05:00:00,2016-07-16,92,4
		1770,"Subject 10",6,"0110",2016-07-16 06:21:53,94.17,71.681,0.4,0.761,0,5.78,NA,NA,1108,140,NA,NA,0,2016-07-16 06:00:00,2016-07-16,93,4
		1771,"Subject 10",6,"0110",2016-07-16 06:49:53,121.217,96.449,0.6,0.796,0.01,5.79,NA,NA,1729,272,NA,NA,0,2016-07-16 06:00:00,2016-07-16,93,4
		1772,"Subject 10",6,"0110",2016-07-16 07:17:53,92.536,70.262,0.4,0.759,0,5.79,NA,NA,216,21,NA,NA,0,2016-07-16 07:00:00,2016-07-16,94,4
		1773,"Subject 10",6,"0110",2016-07-16 07:45:53,98.857,73.788,0.5,0.746,0,5.79,NA,NA,1024,71,NA,NA,0,2016-07-16 07:00:00,2016-07-16,94,4
		1774,"Subject 10",6,"0110",2016-07-16 08:13:53,98.341,78.819,0.5,0.801,0.1,5.89,NA,NA,1632,71,NA,NA,0,2016-07-16 08:00:00,2016-07-16,95,4
		1775,"Subject 10",6,"0110",2016-07-16 08:41:53,95.976,75.723,0.5,0.789,0,5.89,NA,NA,2190,77,NA,NA,0,2016-07-16 08:00:00,2016-07-16,95,4
		1776,"Subject 10",6,"0110",2016-07-16 09:09:53,98.943,77.4,0.5,0.782,0.02,5.91,NA,NA,421,86,NA,NA,0,2016-07-16 09:00:00,2016-07-16,96,4
		1777,"Subject 10",6,"0110",2016-07-16 09:37:53,95.675,73.229,0.5,0.765,0.02,5.93,NA,NA,826,108,NA,NA,0,2016-07-16 09:00:00,2016-07-16,96,4
		1778,"Subject 10",6,"0110",2016-07-16 10:05:53,90.988,68.757,0.4,0.756,0,5.93,NA,NA,568,41,NA,NA,0,2016-07-16 10:00:00,2016-07-16,97,4
		1779,"Subject 10",6,"0110",2016-07-16 10:33:53,94.6,72.627,0.5,0.768,0,5.93,NA,NA,828,94,NA,NA,0,2016-07-16 10:00:00,2016-07-16,97,4
		1780,"Subject 10",6,"0110",2016-07-16 11:01:53,98.169,74.992,0.5,0.764,0,5.93,NA,NA,725,37,NA,NA,0,2016-07-16 11:00:00,2016-07-16,98,4
		1781,"Subject 10",6,"0110",2016-07-16 11:29:53,97.352,73.616,0.5,0.756,0,5.93,NA,NA,1229,216,NA,NA,0,2016-07-16 11:00:00,2016-07-16,98,4
		1782,"Subject 10",6,"0110",2016-07-16 11:57:53,93.009,71.552,0.4,0.769,0,5.93,NA,NA,514,22,NA,NA,0,2016-07-16 11:00:00,2016-07-16,98,4
		1783,"Subject 10",6,"0110",2016-07-16 12:25:53,49.751,35.69,0.2,0.717,0.01,5.94,NA,NA,1350,291,NA,NA,0,2016-07-16 12:00:00,2016-07-16,99,4
		1784,"Subject 10",6,"0110",2016-07-16 12:53:53,100.448,77.744,0.5,0.774,0,5.94,NA,NA,1449,75,NA,NA,0,2016-07-16 12:00:00,2016-07-16,99,4
		1785,"Subject 10",6,"0110",2016-07-16 13:21:53,90.214,67.897,0.4,0.753,0,5.94,NA,NA,654,85,NA,NA,0,2016-07-16 13:00:00,2016-07-16,100,4
		1786,"Subject 10",6,"0110",2016-07-16 13:49:53,102.813,78.26,0.5,0.761,0,5.94,NA,NA,1925,274,NA,NA,0,2016-07-16 13:00:00,2016-07-16,100,4
		1787,"Subject 10",6,"0110",2016-07-16 14:17:53,92.321,70.477,0.4,0.764,0,5.94,NA,NA,674,31,NA,NA,0,2016-07-16 14:00:00,2016-07-16,101,4
		1788,"Subject 10",6,"0110",2016-07-16 14:45:53,95.503,72.971,0.5,0.764,0,5.94,NA,NA,1479,111,NA,NA,0,2016-07-16 14:00:00,2016-07-16,101,4
		1789,"Subject 10",6,"0110",2016-07-16 15:13:53,109.865,84.452,0.5,0.769,0,5.94,NA,NA,1890,337,NA,NA,0,2016-07-16 15:00:00,2016-07-16,102,4
		1790,"Subject 10",6,"0110",2016-07-16 15:41:53,88.021,67.08,0.4,0.762,0,5.94,NA,NA,264,52,NA,NA,0,2016-07-16 15:00:00,2016-07-16,102,4
		1791,"Subject 10",6,"0110",2016-07-16 16:09:53,91.418,69.058,0.4,0.755,0.06,6,NA,NA,1497,139,NA,NA,0,2016-07-16 16:00:00,2016-07-16,103,4
		1792,"Subject 10",6,"0110",2016-07-16 16:37:53,95.804,76.11,0.5,0.795,0.02,6.02,NA,NA,719,74,NA,NA,0,2016-07-16 16:00:00,2016-07-16,103,4
		1793,"Subject 10",6,"0110",2016-07-16 17:05:53,100.104,80.883,0.5,0.808,0.05,6.07,NA,NA,1411,178,NA,NA,0,2016-07-16 17:00:00,2016-07-16,104,4
		1794,"Subject 10",6,"0110",2016-07-16 17:33:53,93.568,72.154,0.4,0.771,0.01,6.08,NA,NA,389,54,NA,NA,0,2016-07-16 17:00:00,2016-07-16,104,4
		1795,"Subject 10",6,"0110",2016-07-16 18:01:53,99.674,80.281,0.5,0.805,0.11,6.19,NA,NA,839,127,NA,NA,0,2016-07-16 18:00:00,2016-07-16,105,4
		1796,"Subject 10",6,"0110",2016-07-16 18:29:53,129.129,101.824,0.6,0.789,0.05,6.24,NA,NA,3577,1347,NA,NA,0,2016-07-16 18:00:00,2016-07-16,105,4
		1797,"Subject 10",6,"0110",2016-07-16 18:57:53,115.67,90.773,0.6,0.785,-0.1,6.14,NA,NA,2255,584,NA,NA,0,2016-07-16 18:00:00,2016-07-16,105,4
		1798,"Subject 10",6,"0110",2016-07-16 19:25:53,115.928,90.042,0.6,0.777,0.1,6.24,NA,NA,2827,778,NA,NA,0,2016-07-16 19:00:00,2016-07-16,106,4
		1799,"Subject 10",6,"0110",2016-07-16 19:53:53,116.487,91.289,0.6,0.784,0.07,6.31,NA,NA,1866,570,NA,NA,0,2016-07-16 19:00:00,2016-07-16,106,4
		1800,"Subject 10",6,"0110",2016-07-16 20:21:53,115.799,97.438,0.6,0.841,0.07,6.38,NA,NA,1873,287,NA,NA,0,2016-07-16 20:00:00,2016-07-16,107,4
		1801,"Subject 10",6,"0110",2016-07-16 20:49:53,138.116,113.348,0.7,0.821,0.18,6.56,NA,NA,3892,1689,NA,NA,0,2016-07-16 20:00:00,2016-07-16,107,4
		1802,"Subject 10",6,"0110",2016-07-16 21:17:53,118.508,91.461,0.6,0.772,0,6.56,NA,NA,2733,573,NA,NA,0,2016-07-16 21:00:00,2016-07-16,108,4
		1803,"Subject 10",6,"0110",2016-07-16 21:45:53,120.572,95.675,0.6,0.793,0.08,6.64,NA,NA,1593,208,NA,NA,0,2016-07-16 21:00:00,2016-07-16,108,4
		1804,"Subject 10",6,"0110",2016-07-16 22:13:53,107.844,87.462,0.5,0.811,0.07,6.71,NA,NA,1064,169,NA,NA,0,2016-07-16 22:00:00,2016-07-16,109,4
		1805,"Subject 10",6,"0110",2016-07-16 22:41:53,104.619,80.84,0.5,0.773,0,6.71,NA,NA,1618,201,NA,NA,0,2016-07-16 22:00:00,2016-07-16,109,4
		1806,"Subject 10",6,"0110",2016-07-16 23:09:53,101.953,78.991,0.5,0.775,0.05,6.76,NA,NA,938,92,NA,NA,0,2016-07-16 23:00:00,2016-07-16,110,4
		1807,"Subject 10",6,"0110",2016-07-16 23:37:53,97.438,74.261,0.5,0.762,0.06,6.82,NA,NA,959,148,NA,NA,0,2016-07-16 23:00:00,2016-07-16,110,4
		1808,"Subject 10",6,"0110",2016-07-17 00:05:53,135.88,107.758,0.7,0.793,0.09,6.91,NA,NA,4733,1890,NA,NA,0,2016-07-17 00:00:00,2016-07-17,111,5
		1809,"Subject 10",6,"0110",2016-07-17 00:33:53,116.057,88.537,0.6,0.763,0.01,6.92,NA,NA,2871,443,NA,NA,0,2016-07-17 00:00:00,2016-07-17,111,5
		1810,"Subject 10",6,"0110",2016-07-17 01:01:53,103.716,77.142,0.5,0.744,0.05,6.97,NA,NA,1236,203,NA,NA,0,2016-07-17 01:00:00,2016-07-17,112,5
		1811,"Subject 10",6,"0110",2016-07-17 01:29:53,112.187,87.763,0.5,0.782,0.12,7.09,NA,NA,888,93,NA,NA,0,2016-07-17 01:00:00,2016-07-17,112,5
		1812,"Subject 10",6,"0110",2016-07-17 01:57:53,97.61,75.551,0.5,0.774,0,7.09,NA,NA,895,72,NA,NA,0,2016-07-17 01:00:00,2016-07-17,112,5
		1813,"Subject 10",6,"0110",2016-07-17 02:25:53,122.249,93.396,0.6,0.764,0,7.09,NA,NA,2607,397,NA,NA,0,2016-07-17 02:00:00,2016-07-17,113,5
		1814,"Subject 10",6,"0110",2016-07-17 02:53:53,103.544,81.27,0.5,0.785,0.05,7.14,NA,NA,816,82,NA,NA,0,2016-07-17 02:00:00,2016-07-17,113,5
		1815,"Subject 10",6,"0110",2016-07-17 03:21:53,95.202,72.885,0.5,0.766,0.01,7.15,NA,NA,1046,87,NA,NA,0,2016-07-17 03:00:00,2016-07-17,114,5
		1816,"Subject 10",6,"0110",2016-07-17 03:49:53,96.062,71.896,0.5,0.748,0,7.15,NA,NA,915,99,NA,NA,0,2016-07-17 03:00:00,2016-07-17,114,5
		1817,"Subject 10",6,"0110",2016-07-17 04:17:53,109.005,87.849,0.5,0.806,0.04,7.19,NA,NA,1492,228,NA,NA,0,2016-07-17 04:00:00,2016-07-17,115,5
		1818,"Subject 10",6,"0110",2016-07-17 04:45:53,127.796,105.608,0.6,0.827,0.1,7.29,NA,NA,2018,625,NA,NA,0,2016-07-17 04:00:00,2016-07-17,115,5
		1819,"Subject 10",6,"0110",2016-07-17 05:13:53,130.118,105.651,0.6,0.812,0.14,7.43,NA,NA,4972,1832,NA,NA,0,2016-07-17 05:00:00,2016-07-17,116,5
		1820,"Subject 10",6,"0110",2016-07-17 05:41:53,95.675,71.595,0.5,0.748,0,7.43,NA,NA,2320,401,NA,NA,0,2016-07-17 05:00:00,2016-07-17,116,5
		1821,"Subject 10",6,"0110",2016-07-17 06:09:53,93.439,69.316,0.4,0.742,0,7.43,NA,NA,289,47,NA,NA,0,2016-07-17 06:00:00,2016-07-17,117,5
		1822,"Subject 10",6,"0110",2016-07-17 06:37:53,102.469,80.238,0.5,0.783,0.15,7.58,NA,NA,1608,155,NA,NA,0,2016-07-17 06:00:00,2016-07-17,117,5
		1823,"Subject 10",6,"0110",2016-07-17 07:05:53,94.256,74.046,0.5,0.786,0,7.58,NA,NA,979,138,NA,NA,0,2016-07-17 07:00:00,2016-07-17,118,5
		1824,"Subject 10",6,"0110",2016-07-17 07:33:53,98.513,78.948,0.5,0.802,0.05,7.63,NA,NA,710,102,NA,NA,0,2016-07-17 07:00:00,2016-07-17,118,5
		1825,"Subject 10",6,"0110",2016-07-17 08:01:53,97.911,74.992,0.5,0.766,0.03,7.66,NA,NA,1090,141,NA,NA,0,2016-07-17 08:00:00,2016-07-17,119,5
		1826,"Subject 10",6,"0110",2016-07-17 08:29:53,97.61,75.035,0.5,0.769,0,7.66,NA,NA,727,94,NA,NA,0,2016-07-17 08:00:00,2016-07-17,119,5
		1827,"Subject 10",6,"0110",2016-07-17 08:57:53,89.827,67.338,0.4,0.75,0.02,7.68,NA,NA,1207,188,NA,NA,0,2016-07-17 08:00:00,2016-07-17,119,5
		1828,"Subject 10",6,"0110",2016-07-17 09:25:53,96.578,74.734,0.5,0.774,0.03,7.71,NA,NA,891,110,NA,NA,0,2016-07-17 09:00:00,2016-07-17,120,5
		1829,"Subject 10",6,"0110",2016-07-17 09:53:53,108.231,84.237,0.5,0.778,0.08,7.79,NA,NA,715,124,NA,NA,0,2016-07-17 09:00:00,2016-07-17,120,5
		1830,"Subject 10",6,"0110",2016-07-17 10:21:53,95.804,75.078,0.5,0.784,0,7.79,NA,NA,1317,78,NA,NA,0,2016-07-17 10:00:00,2016-07-17,121,5
		1831,"Subject 10",6,"0110",2016-07-17 10:49:53,92.149,71.982,0.4,0.781,0.01,7.8,NA,NA,687,73,NA,NA,0,2016-07-17 10:00:00,2016-07-17,121,5
		1832,"Subject 10",6,"0110",2016-07-17 11:17:53,94.729,72.412,0.5,0.764,0,7.8,NA,NA,1598,111,NA,NA,0,2016-07-17 11:00:00,2016-07-17,122,5
		1833,"Subject 10",6,"0110",2016-07-17 11:45:53,41.796,30.788,0.2,0.737,0,7.8,NA,NA,880,226,NA,NA,0,2016-07-17 11:00:00,2016-07-17,122,5
		1834,"Subject 10",6,"0110",2016-07-17 12:13:53,105.006,79.292,0.5,0.755,0,7.8,NA,NA,752,61,NA,NA,0,2016-07-17 12:00:00,2016-07-17,123,5
		1835,"Subject 10",6,"0110",2016-07-17 12:41:53,107.199,81.528,0.5,0.76,0,7.8,NA,NA,1164,189,NA,NA,0,2016-07-17 12:00:00,2016-07-17,123,5
		1836,"Subject 10",6,"0110",2016-07-17 13:09:53,100.792,78.948,0.5,0.783,0,7.8,NA,NA,630,77,NA,NA,0,2016-07-17 13:00:00,2016-07-17,124,5
		1837,"Subject 10",6,"0110",2016-07-17 13:37:53,89.311,69.058,0.4,0.773,0,7.8,NA,NA,333,20,NA,NA,0,2016-07-17 13:00:00,2016-07-17,124,5
		1838,"Subject 10",6,"0110",2016-07-17 14:05:53,104.318,82.044,0.5,0.787,0,7.8,NA,NA,840,112,NA,NA,0,2016-07-17 14:00:00,2016-07-17,125,5
		1839,"Subject 10",6,"0110",2016-07-17 14:33:53,99.846,76.411,0.5,0.765,0,7.8,NA,NA,984,166,NA,NA,0,2016-07-17 14:00:00,2016-07-17,125,5
		1840,"Subject 10",6,"0110",2016-07-17 15:01:53,93.181,72.799,0.4,0.781,0.03,7.83,NA,NA,1061,133,NA,NA,0,2016-07-17 15:00:00,2016-07-17,126,5
		1841,"Subject 10",6,"0110",2016-07-17 15:29:53,91.289,71.724,0.4,0.786,0.03,7.86,NA,NA,980,92,NA,NA,0,2016-07-17 15:00:00,2016-07-17,126,5
		1842,"Subject 10",6,"0110",2016-07-17 15:57:53,110.424,90.945,0.5,0.824,0.07,7.93,NA,NA,1144,283,NA,NA,0,2016-07-17 15:00:00,2016-07-17,126,5
		1843,"Subject 10",6,"0110",2016-07-17 16:25:53,85.312,65.618,0.4,0.769,0.01,7.94,NA,NA,1343,168,NA,NA,0,2016-07-17 16:00:00,2016-07-17,127,5
		1844,"Subject 10",6,"0110",2016-07-17 16:53:53,85.183,66.65,0.4,0.782,-0.01,7.93,NA,NA,399,57,NA,NA,0,2016-07-17 16:00:00,2016-07-17,127,5
		1845,"Subject 10",6,"0110",2016-07-17 17:21:53,98.814,78.389,0.5,0.793,0.11,8.04,NA,NA,1454,208,NA,NA,0,2016-07-17 17:00:00,2016-07-17,128,5
		1846,"Subject 10",6,"0110",2016-07-17 17:49:53,92.493,77.271,0.4,0.835,0.03,8.07,NA,NA,1266,71,NA,NA,0,2016-07-17 17:00:00,2016-07-17,128,5
		1847,"Subject 10",6,"0110",2016-07-17 18:17:53,131.752,109.134,0.6,0.828,0.11,8.18,NA,NA,3406,1065,NA,NA,0,2016-07-17 18:00:00,2016-07-17,129,5
		1848,"Subject 10",6,"0110",2016-07-17 18:45:53,118.723,97.137,0.6,0.818,0.06,8.24,NA,NA,2376,382,NA,NA,0,2016-07-17 18:00:00,2016-07-17,129,5
		1849,"Subject 10",6,"0110",2016-07-17 19:13:53,138.503,113.219,0.7,0.817,0.12,8.36,NA,NA,2850,1120,NA,NA,0,2016-07-17 19:00:00,2016-07-17,130,5
		1850,"Subject 10",6,"0110",2016-07-17 19:41:53,128.742,103.759,0.6,0.806,0.11,8.47,NA,NA,4084,1355,NA,NA,0,2016-07-17 19:00:00,2016-07-17,130,5
		1851,"Subject 10",6,"0110",2016-07-17 20:09:53,127.022,100.921,0.6,0.794,0.04,8.51,NA,NA,3202,873,NA,NA,0,2016-07-17 20:00:00,2016-07-17,131,5
		1852,"Subject 10",6,"0110",2016-07-17 20:37:53,108.231,87.763,0.5,0.811,0.12,8.63,NA,NA,1039,165,NA,NA,0,2016-07-17 20:00:00,2016-07-17,131,5
		1853,"Subject 10",6,"0110",2016-07-17 21:05:53,114.982,96.191,0.6,0.837,0.13,8.76,NA,NA,959,135,NA,NA,0,2016-07-17 21:00:00,2016-07-17,132,5
		1854,"Subject 10",6,"0110",2016-07-17 21:33:53,135.622,114.122,0.7,0.841,0.07,8.83,NA,NA,4481,1515,NA,NA,0,2016-07-17 21:00:00,2016-07-17,132,5
		1855,"Subject 10",6,"0110",2016-07-17 22:01:53,108.145,83.377,0.5,0.771,0.01,8.84,NA,NA,2096,281,NA,NA,0,2016-07-17 22:00:00,2016-07-17,133,5
		1856,"Subject 10",6,"0110",2016-07-17 22:29:53,105.78,85.269,0.5,0.806,0.04,8.88,NA,NA,897,82,NA,NA,0,2016-07-17 22:00:00,2016-07-17,133,5
		1857,"Subject 10",6,"0110",2016-07-17 22:57:53,104.619,81.528,0.5,0.779,0.01,8.89,NA,NA,1654,302,NA,NA,0,2016-07-17 22:00:00,2016-07-17,133,5
		1858,"Subject 10",6,"0110",2016-07-17 23:25:53,97.395,75.68,0.5,0.777,0.05,8.94,NA,NA,2176,399,NA,NA,0,2016-07-17 23:00:00,2016-07-17,134,5
		1859,"Subject 10",6,"0110",2016-07-17 23:53:53,136.31,113.907,0.7,0.836,0.23,9.17,NA,NA,3099,1100,NA,NA,0,2016-07-17 23:00:00,2016-07-17,134,5
		1860,"Subject 10",6,"0110",2016-07-18 00:21:53,111.112,88.15,0.5,0.793,0.03,9.2,NA,NA,2820,544,NA,NA,0,2016-07-18 00:00:00,2016-07-18,135,6
		1861,"Subject 10",6,"0110",2016-07-18 00:49:53,101.824,82.947,0.5,0.815,0.08,9.28,NA,NA,1753,84,NA,NA,0,2016-07-18 00:00:00,2016-07-18,135,6
		1862,"Subject 10",6,"0110",2016-07-18 01:17:53,99.545,77.744,0.5,0.781,0,9.28,NA,NA,850,75,NA,NA,0,2016-07-18 01:00:00,2016-07-18,136,6
		1863,"Subject 10",6,"0110",2016-07-18 01:45:53,93.998,73.573,0.4,0.783,0.01,9.29,NA,NA,1531,116,NA,NA,0,2016-07-18 01:00:00,2016-07-18,136,6
		1864,"Subject 10",6,"0110",2016-07-18 02:13:53,108.876,84.753,0.5,0.778,0.01,9.3,NA,NA,2846,593,NA,NA,0,2016-07-18 02:00:00,2016-07-18,137,6
		1865,"Subject 10",6,"0110",2016-07-18 02:41:53,104.275,78.819,0.5,0.756,0,9.3,NA,NA,1707,96,NA,NA,0,2016-07-18 02:00:00,2016-07-18,137,6
		1866,"Subject 10",6,"0110",2016-07-18 03:09:53,108.446,86.774,0.5,0.8,0.07,9.37,NA,NA,855,154,NA,NA,0,2016-07-18 03:00:00,2016-07-18,138,6
		1867,"Subject 10",6,"0110",2016-07-18 03:37:53,114.853,88.15,0.5,0.768,0.08,9.45,NA,NA,1182,210,NA,NA,0,2016-07-18 03:00:00,2016-07-18,138,6
		1868,"Subject 10",6,"0110",2016-07-18 04:05:53,100.405,83.377,0.5,0.83,0.03,9.48,NA,NA,1363,108,NA,NA,0,2016-07-18 04:00:00,2016-07-18,139,6
		1869,"Subject 10",6,"0110",2016-07-18 04:33:53,140.481,115.627,0.7,0.823,0.13,9.61,NA,NA,4410,1680,NA,NA,0,2016-07-18 04:00:00,2016-07-18,139,6
		1870,"Subject 10",6,"0110",2016-07-18 05:01:53,101.91,77.701,0.5,0.762,0.01,9.62,NA,NA,1246,125,NA,NA,0,2016-07-18 05:00:00,2016-07-18,140,6
		1871,"Subject 10",6,"0110",2016-07-18 05:29:53,139.492,113.348,0.7,0.813,0.09,9.71,NA,NA,4933,1995,NA,NA,0,2016-07-18 05:00:00,2016-07-18,140,6
		1872,"Subject 10",6,"0110",2016-07-18 05:57:53,119.067,92.751,0.6,0.779,0.02,9.73,NA,NA,3452,1091,NA,NA,0,2016-07-18 05:00:00,2016-07-18,140,6
		1873,"Subject 10",6,"0110",2016-07-18 06:25:53,94.815,71.423,0.4,0.754,0,9.73,NA,NA,1002,155,NA,NA,0,2016-07-18 06:00:00,2016-07-18,141,6
		1874,"Subject 10",6,"0110",2016-07-18 06:53:53,94.213,71.896,0.4,0.763,0,9.73,NA,NA,932,119,NA,NA,0,2016-07-18 06:00:00,2016-07-18,141,6
		1875,"Subject 10",6,"0110",2016-07-18 07:21:53,96.922,79.077,0.5,0.816,0.06,9.79,NA,NA,2303,166,NA,NA,0,2016-07-18 07:00:00,2016-07-18,142,6
		1876,"Subject 10",6,"0110",2016-07-18 07:49:53,100.534,79.507,0.5,0.791,0,9.79,NA,NA,2079,367,NA,NA,0,2016-07-18 07:00:00,2016-07-18,142,6
		1877,"Subject 10",6,"0110",2016-07-18 08:17:53,91.418,70.95,0.4,0.776,0.02,9.81,NA,NA,588,60,NA,NA,0,2016-07-18 08:00:00,2016-07-18,143,6
		1878,"Subject 10",6,"0110",2016-07-18 08:45:53,92.45,71.767,0.4,0.776,0.01,9.82,NA,NA,776,139,NA,NA,0,2016-07-18 08:00:00,2016-07-18,143,6
		1879,"Subject 10",6,"0110",2016-07-18 09:13:53,88.623,70.219,0.4,0.792,0.05,9.87,NA,NA,453,53,NA,NA,0,2016-07-18 09:00:00,2016-07-18,144,6
		1880,"Subject 10",6,"0110",2016-07-18 09:41:53,111.241,87.247,0.5,0.784,0,9.87,NA,NA,1655,295,NA,NA,0,2016-07-18 09:00:00,2016-07-18,144,6
		1881,"Subject 10",6,"0110",2016-07-18 10:09:53,87.204,66.693,0.4,0.765,0,9.87,NA,NA,590,67,NA,NA,0,2016-07-18 10:00:00,2016-07-18,145,6
		1882,"Subject 10",6,"0110",2016-07-18 10:37:53,127.968,98.814,0.6,0.772,0.01,9.88,NA,NA,494,80,NA,NA,0,2016-07-18 10:00:00,2016-07-18,145,6
		1883,"Subject 10",6,"0110",NA,0,0,0,0,0,0,NA,NA,0,0,NA,NA,0,NA,NA,NA,NA
		1884,"Subject 10",6,NA,NA,NA,NA,NA,NA,NA,NA,NA,NA,NA,NA,NA,NA,NA,NA,NA,NA,NA
		1885,"Subject 3",7,"0103",2016-07-12 09:13:53,168.8088,125.7408,0.8,0.745,-0.02,-0.02,NA,NA,3323,1975,NA,NA,0,2016-07-12 09:00:00,2016-07-12,0,0
		1886,"Subject 3",7,"0103",2016-07-12 09:41:53,135.198,101.9868,0.6,0.755,-0.01,-0.03,NA,NA,8666,4874,NA,NA,0,2016-07-12 09:00:00,2016-07-12,0,0
		1887,"Subject 3",7,"0103",2016-07-12 10:09:53,126.0072,94.0392,0.6,0.746,-0.04,-0.07,NA,NA,6607,3329,NA,NA,0,2016-07-12 10:00:00,2016-07-12,1,0
		1888,"Subject 3",7,"0103",2016-07-12 10:37:53,118.8588,88.0452,0.6,0.741,-0.02,-0.09,NA,NA,6748,3450,NA,NA,0,2016-07-12 10:00:00,2016-07-12,1,0
		1889,"Subject 3",7,"0103",2016-07-12 11:05:53,112.2432,83.8716,0.5,0.747,-0.02,-0.11,NA,NA,3248,1062,NA,NA,0,2016-07-12 11:00:00,2016-07-12,2,0
		1890,"Subject 3",7,"0103",2016-07-12 11:33:53,88.5336,64.9128,0.4,0.733,-0.01,-0.12,NA,NA,2583,572,NA,NA,0,2016-07-12 11:00:00,2016-07-12,2,0
		1891,"Subject 3",7,"0103",2016-07-12 12:01:53,90.354,68.5536,0.4,0.758,0,-0.12,NA,NA,818,38,NA,NA,0,2016-07-12 12:00:00,2016-07-12,3,0
		1892,"Subject 3",7,"0103",2016-07-12 12:29:53,89.3772,67.6212,0.4,0.757,-0.02,-0.14,NA,NA,346,23,NA,NA,0,2016-07-12 12:00:00,2016-07-12,3,0
		1893,"Subject 3",7,"0103",2016-07-12 12:57:53,126.0516,96.1704,0.6,0.763,0.01,-0.13,NA,NA,2467,993,NA,NA,0,2016-07-12 12:00:00,2016-07-12,3,0
		1894,"Subject 3",7,"0103",2016-07-12 13:25:53,105.3168,79.1208,0.5,0.751,0,-0.13,NA,NA,3202,817,NA,NA,0,2016-07-12 13:00:00,2016-07-12,4,0
		1895,"Subject 3",7,"0103",2016-07-12 13:53:53,91.464,68.3316,0.4,0.747,-0.01,-0.14,NA,NA,158,12,NA,NA,0,2016-07-12 13:00:00,2016-07-12,4,0
		1896,"Subject 3",7,"0103",2016-07-12 14:21:53,85.8252,65.8008,0.4,0.767,0,-0.14,NA,NA,769,32,NA,NA,0,2016-07-12 14:00:00,2016-07-12,5,0
		1897,"Subject 3",7,"0103",2016-07-12 14:49:53,79.7424,58.2528,0.4,0.731,-0.01,-0.15,NA,NA,287,25,NA,NA,0,2016-07-12 14:00:00,2016-07-12,5,0
		1898,"Subject 3",7,"0103",2016-07-12 15:17:53,62.5596,53.946,0.3,0.863,0.02,-0.13,NA,NA,953,246,NA,NA,0,2016-07-12 15:00:00,2016-07-12,6,0
		1899,"Subject 3",7,"0103",2016-07-12 15:45:53,83.9604,62.4708,0.4,0.744,-0.02,-0.15,NA,NA,1684,187,NA,NA,0,2016-07-12 15:00:00,2016-07-12,6,0
		1900,"Subject 3",7,"0103",2016-07-12 16:13:53,80.364,62.5152,0.4,0.778,0,-0.15,NA,NA,117,17,NA,NA,0,2016-07-12 16:00:00,2016-07-12,7,0
		1901,"Subject 3",7,"0103",2016-07-12 16:41:53,90.576,70.5516,0.4,0.779,0.01,-0.14,NA,NA,342,24,NA,NA,0,2016-07-12 16:00:00,2016-07-12,7,0
		1902,"Subject 3",7,"0103",2016-07-12 17:09:53,88.2228,68.2872,0.4,0.774,-0.01,-0.15,NA,NA,1624,139,NA,NA,0,2016-07-12 17:00:00,2016-07-12,8,0
		1903,"Subject 3",7,"0103",2016-07-12 17:37:53,84.5376,63.2256,0.4,0.748,0,-0.15,NA,NA,115,4,NA,NA,0,2016-07-12 17:00:00,2016-07-12,8,0
		1904,"Subject 3",7,"0103",2016-07-12 18:05:53,121.434,95.904,0.6,0.79,0.02,-0.13,NA,NA,2916,575,NA,NA,0,2016-07-12 18:00:00,2016-07-12,9,0
		1905,"Subject 3",7,"0103",2016-07-12 18:33:53,93.684,71.484,0.4,0.763,0.01,-0.12,NA,NA,2858,772,NA,NA,0,2016-07-12 18:00:00,2016-07-12,9,0
		1906,"Subject 3",7,"0103",2016-07-12 19:01:53,104.562,81.4296,0.5,0.778,0.03,-0.09,NA,NA,596,58,NA,NA,0,2016-07-12 19:00:00,2016-07-12,10,0
		1907,"Subject 3",7,"0103",2016-07-12 19:29:53,122.9436,94.8384,0.6,0.771,0.02,-0.07,NA,NA,4922,1905,NA,NA,0,2016-07-12 19:00:00,2016-07-12,10,0
		1908,"Subject 3",7,"0103",2016-07-12 19:57:53,138.3504,108.7356,0.7,0.786,0.11,0.04,NA,NA,3818,1097,NA,NA,0,2016-07-12 19:00:00,2016-07-12,10,0
		1909,"Subject 3",7,"0103",2016-07-12 20:25:53,116.5944,91.5528,0.6,0.785,0.03,0.07,NA,NA,3638,1043,NA,NA,0,2016-07-12 20:00:00,2016-07-12,11,0
		1910,"Subject 3",7,"0103",2016-07-12 20:53:53,120.1908,93.4176,0.6,0.777,0.06,0.13,NA,NA,3267,982,NA,NA,0,2016-07-12 20:00:00,2016-07-12,11,0
		1911,"Subject 3",7,"0103",2016-07-12 21:21:53,96.2592,73.3932,0.5,0.762,0.06,0.19,NA,NA,503,105,NA,NA,0,2016-07-12 21:00:00,2016-07-12,12,0
		1912,"Subject 3",7,"0103",2016-07-12 21:49:53,133.7772,107.8476,0.6,0.806,0.11,0.3,NA,NA,2752,1034,NA,NA,0,2016-07-12 21:00:00,2016-07-12,12,0
		1913,"Subject 3",7,"0103",2016-07-12 22:17:53,109.0908,88.8444,0.5,0.814,0.13,0.43,NA,NA,3400,811,NA,NA,0,2016-07-12 22:00:00,2016-07-12,13,0
		1914,"Subject 3",7,"0103",2016-07-12 22:45:53,101.898,78.7656,0.5,0.773,-0.01,0.42,NA,NA,496,22,NA,NA,0,2016-07-12 22:00:00,2016-07-12,13,0
		1915,"Subject 3",7,"0103",2016-07-12 23:13:53,100.344,81.8292,0.5,0.816,0.18,0.6,NA,NA,2597,724,NA,NA,0,2016-07-12 23:00:00,2016-07-12,14,0
		1916,"Subject 3",7,"0103",2016-07-12 23:41:53,92.352,74.3256,0.4,0.805,0,0.6,NA,NA,534,27,NA,NA,0,2016-07-12 23:00:00,2016-07-12,14,0
		1917,"Subject 3",7,"0103",2016-07-13 00:09:53,116.5056,94.2612,0.6,0.809,0.05,0.65,NA,NA,716,216,NA,NA,0,2016-07-13 00:00:00,2016-07-13,15,1
		1918,"Subject 3",7,"0103",2016-07-13 00:37:53,113.3088,92.2188,0.5,0.814,0.05,0.7,NA,NA,3736,1098,NA,NA,0,2016-07-13 00:00:00,2016-07-13,15,1
		1919,"Subject 3",7,"0103",2016-07-13 01:05:53,100.6548,76.4124,0.5,0.759,0,0.7,NA,NA,2679,146,NA,NA,0,2016-07-13 01:00:00,2016-07-13,16,1
		1920,"Subject 3",7,"0103",2016-07-13 01:33:53,112.0656,88.356,0.5,0.788,0.13,0.83,NA,NA,757,169,NA,NA,0,2016-07-13 01:00:00,2016-07-13,16,1
		1921,"Subject 3",7,"0103",2016-07-13 02:01:53,93.2844,74.8584,0.4,0.802,-0.01,0.82,NA,NA,2151,58,NA,NA,0,2016-07-13 02:00:00,2016-07-13,17,1
		1922,"Subject 3",7,"0103",2016-07-13 02:29:53,135.8196,107.226,0.7,0.789,0.17,0.99,NA,NA,2270,441,NA,NA,0,2016-07-13 02:00:00,2016-07-13,17,1
		1923,"Subject 3",7,"0103",2016-07-13 02:57:53,93.1956,71.706,0.4,0.77,0.01,1,NA,NA,1938,487,NA,NA,0,2016-07-13 02:00:00,2016-07-13,17,1
		1924,"Subject 3",7,"0103",2016-07-13 03:25:53,91.5528,72.0168,0.4,0.787,0,1,NA,NA,1218,29,NA,NA,0,2016-07-13 03:00:00,2016-07-13,18,1
		1925,"Subject 3",7,"0103",2016-07-13 03:53:53,96.2592,74.2812,0.5,0.772,0.01,1.01,NA,NA,938,94,NA,NA,0,2016-07-13 03:00:00,2016-07-13,18,1
		1926,"Subject 3",7,"0103",2016-07-13 04:21:53,118.992,96.4368,0.6,0.811,0.05,1.06,NA,NA,4670,349,NA,NA,0,2016-07-13 04:00:00,2016-07-13,19,1
		1927,"Subject 3",7,"0103",2016-07-13 04:49:53,113.2644,86.8464,0.5,0.767,0,1.06,NA,NA,2645,80,NA,NA,0,2016-07-13 04:00:00,2016-07-13,19,1
		1928,"Subject 3",7,"0103",2016-07-13 05:17:53,141.0588,114.8628,0.7,0.814,0.15,1.21,NA,NA,4968,1698,NA,NA,0,2016-07-13 05:00:00,2016-07-13,20,1
		1929,"Subject 3",7,"0103",2016-07-13 05:45:53,135.9084,107.2704,0.7,0.789,0.05,1.26,NA,NA,4879,1980,NA,NA,0,2016-07-13 05:00:00,2016-07-13,20,1
		1930,"Subject 3",7,"0103",2016-07-13 06:13:53,140.2152,108.7356,0.7,0.775,0.08,1.34,NA,NA,4826,2095,NA,NA,0,2016-07-13 06:00:00,2016-07-13,21,1
		1931,"Subject 3",7,"0103",2016-07-13 06:41:53,89.688,67.3548,0.4,0.751,-0.02,1.32,NA,NA,1738,557,NA,NA,0,2016-07-13 06:00:00,2016-07-13,21,1
		1932,"Subject 3",7,"0103",2016-07-13 07:09:53,95.238,72.7272,0.5,0.764,0.01,1.33,NA,NA,485,47,NA,NA,0,2016-07-13 07:00:00,2016-07-13,22,1
		1933,"Subject 3",7,"0103",2016-07-13 07:37:53,105.3612,86.2692,0.5,0.819,0.04,1.37,NA,NA,3246,846,NA,NA,0,2016-07-13 07:00:00,2016-07-13,22,1
		1934,"Subject 3",7,"0103",2016-07-13 08:05:53,91.1532,68.9532,0.4,0.756,0,1.37,NA,NA,1756,153,NA,NA,0,2016-07-13 08:00:00,2016-07-13,23,1
		1935,"Subject 3",7,"0103",2016-07-13 08:33:53,88.2228,67.3992,0.4,0.764,0.01,1.38,NA,NA,104,21,NA,NA,0,2016-07-13 08:00:00,2016-07-13,23,1
		1936,"Subject 3",7,"0103",2016-07-13 09:01:53,94.3944,77.7888,0.5,0.824,0.08,1.46,NA,NA,2799,670,NA,NA,0,2016-07-13 09:00:00,2016-07-13,24,1
		1937,"Subject 3",7,"0103",2016-07-13 09:29:53,87.5124,68.4648,0.4,0.782,0.01,1.47,NA,NA,732,36,NA,NA,0,2016-07-13 09:00:00,2016-07-13,24,1
		1938,"Subject 3",7,"0103",2016-07-13 09:57:53,83.694,66.0672,0.4,0.79,0,1.47,NA,NA,652,63,NA,NA,0,2016-07-13 09:00:00,2016-07-13,24,1
		1939,"Subject 3",7,"0103",2016-07-13 10:25:53,90.8868,72.2832,0.4,0.795,0.07,1.54,NA,NA,468,34,NA,NA,0,2016-07-13 10:00:00,2016-07-13,25,1
		1940,"Subject 3",7,"0103",2016-07-13 10:53:53,109.7568,88.1784,0.5,0.803,0.05,1.59,NA,NA,3242,527,NA,NA,0,2016-07-13 10:00:00,2016-07-13,25,1
		1941,"Subject 3",7,"0103",2016-07-13 11:21:53,82.8504,63.936,0.4,0.772,0,1.59,NA,NA,3189,141,NA,NA,0,2016-07-13 11:00:00,2016-07-13,26,1
		1942,"Subject 3",7,"0103",2016-07-13 11:49:53,82.806,64.824,0.4,0.782,0.01,1.6,NA,NA,309,32,NA,NA,0,2016-07-13 11:00:00,2016-07-13,26,1
		1943,"Subject 3",7,"0103",2016-07-13 12:17:53,90.354,73.3932,0.4,0.812,0.06,1.66,NA,NA,1598,470,NA,NA,0,2016-07-13 12:00:00,2016-07-13,27,1
		1944,"Subject 3",7,"0103",2016-07-13 12:45:53,85.3812,68.598,0.4,0.803,0,1.66,NA,NA,390,9,NA,NA,0,2016-07-13 12:00:00,2016-07-13,27,1
		1945,"Subject 3",7,"0103",2016-07-13 13:13:53,88.9332,72.594,0.4,0.816,0.06,1.72,NA,NA,788,54,NA,NA,0,2016-07-13 13:00:00,2016-07-13,28,1
		1946,"Subject 3",7,"0103",2016-07-13 13:41:53,92.2632,76.3236,0.4,0.827,0.04,1.76,NA,NA,1184,179,NA,NA,0,2016-07-13 13:00:00,2016-07-13,28,1
		1947,"Subject 3",7,"0103",2016-07-13 14:09:53,24.7308,24.3756,0.1,0.986,0.01,1.77,NA,NA,1600,669,NA,NA,0,2016-07-13 14:00:00,2016-07-13,29,1
		1948,"Subject 3",7,"0103",2016-07-13 14:37:53,99.3228,70.3296,0.5,0.708,0,1.77,NA,NA,2477,723,NA,NA,0,2016-07-13 14:00:00,2016-07-13,29,1
		1949,"Subject 3",7,"0103",2016-07-13 15:05:53,112.6428,90.4872,0.5,0.803,0,1.77,NA,NA,3213,1103,NA,NA,0,2016-07-13 15:00:00,2016-07-13,30,1
		1950,"Subject 3",7,"0103",2016-07-13 15:33:53,91.464,69.7524,0.4,0.762,-0.01,1.76,NA,NA,410,60,NA,NA,0,2016-07-13 15:00:00,2016-07-13,30,1
		1951,"Subject 3",7,"0103",2016-07-13 16:01:53,88.8888,68.8644,0.4,0.775,0,1.76,NA,NA,345,54,NA,NA,0,2016-07-13 16:00:00,2016-07-13,31,1
		1952,"Subject 3",7,"0103",2016-07-13 16:29:53,91.2864,70.818,0.4,0.776,0.01,1.77,NA,NA,1995,269,NA,NA,0,2016-07-13 16:00:00,2016-07-13,31,1
		1953,"Subject 3",7,"0103",2016-07-13 16:57:53,100.788,79.92,0.5,0.793,-0.01,1.76,NA,NA,830,139,NA,NA,0,2016-07-13 16:00:00,2016-07-13,31,1
		1954,"Subject 3",7,"0103",2016-07-13 17:25:53,92.1744,69.3528,0.4,0.753,0,1.76,NA,NA,983,178,NA,NA,0,2016-07-13 17:00:00,2016-07-13,32,1
		1955,"Subject 3",7,"0103",2016-07-13 17:53:53,94.4832,71.3952,0.4,0.756,0.01,1.77,NA,NA,440,31,NA,NA,0,2016-07-13 17:00:00,2016-07-13,32,1
		1956,"Subject 3",7,"0103",2016-07-13 18:21:53,118.7256,92.2632,0.6,0.777,0.09,1.86,NA,NA,1612,457,NA,NA,0,2016-07-13 18:00:00,2016-07-13,33,1
		1957,"Subject 3",7,"0103",2016-07-13 18:49:53,107.9808,81.0744,0.5,0.751,0,1.86,NA,NA,1390,247,NA,NA,0,2016-07-13 18:00:00,2016-07-13,33,1
		1958,"Subject 3",7,"0103",2016-07-13 19:17:53,145.5432,114.3744,0.7,0.786,0.07,1.93,NA,NA,4719,1980,NA,NA,0,2016-07-13 19:00:00,2016-07-13,34,1
		1959,"Subject 3",7,"0103",2016-07-13 19:45:53,107.448,82.3176,0.5,0.766,0.07,2,NA,NA,2290,421,NA,NA,0,2016-07-13 19:00:00,2016-07-13,34,1
		1960,"Subject 3",7,"0103",2016-07-13 20:13:53,153.1356,123.9648,0.7,0.809,0.11,2.11,NA,NA,3098,1328,NA,NA,0,2016-07-13 20:00:00,2016-07-13,35,1
		1961,"Subject 3",7,"0103",2016-07-13 20:41:53,102.5196,80.0976,0.5,0.781,0.1,2.21,NA,NA,1792,328,NA,NA,0,2016-07-13 20:00:00,2016-07-13,35,1
		1962,"Subject 3",7,"0103",2016-07-13 21:09:53,132.2676,108.6468,0.6,0.821,0.14,2.35,NA,NA,3663,1106,NA,NA,0,2016-07-13 21:00:00,2016-07-13,36,1
		1963,"Subject 3",7,"0103",2016-07-13 21:37:53,97.7688,78.0108,0.5,0.798,0.09,2.44,NA,NA,2822,751,NA,NA,0,2016-07-13 21:00:00,2016-07-13,36,1
		1964,"Subject 3",7,"0103",2016-07-13 22:05:53,128.538,107.4924,0.6,0.836,0.07,2.51,NA,NA,2528,409,NA,NA,0,2016-07-13 22:00:00,2016-07-13,37,1
		1965,"Subject 3",7,"0103",2016-07-13 22:33:53,102.342,81.5628,0.5,0.797,0.1,2.61,NA,NA,2648,929,NA,NA,0,2016-07-13 22:00:00,2016-07-13,37,1
		1966,"Subject 3",7,"0103",2016-07-13 23:01:53,97.1028,77.5224,0.5,0.798,0,2.61,NA,NA,1033,40,NA,NA,0,2016-07-13 23:00:00,2016-07-13,38,1
		1967,"Subject 3",7,"0103",2016-07-13 23:29:53,143.4564,119.4804,0.7,0.833,0.16,2.77,NA,NA,2964,1355,NA,NA,0,2016-07-13 23:00:00,2016-07-13,38,1
		1968,"Subject 3",7,"0103",2016-07-13 23:57:53,116.55,98.2572,0.6,0.843,0.1,2.87,NA,NA,3998,1356,NA,NA,0,2016-07-13 23:00:00,2016-07-13,38,1
		1969,"Subject 3",7,"0103",2016-07-14 00:25:53,102.8304,80.8968,0.5,0.787,0.01,2.88,NA,NA,1350,78,NA,NA,0,2016-07-14 00:00:00,2016-07-14,39,2
		1970,"Subject 3",7,"0103",2016-07-14 00:53:53,100.9212,79.0764,0.5,0.784,0,2.88,NA,NA,621,23,NA,NA,0,2016-07-14 00:00:00,2016-07-14,39,2
		1971,"Subject 3",7,"0103",2016-07-14 01:21:53,133.9992,109.7568,0.6,0.819,0.17,3.05,NA,NA,2167,693,NA,NA,0,2016-07-14 01:00:00,2016-07-14,40,2
		1972,"Subject 3",7,"0103",2016-07-14 01:49:53,122.5884,103.3632,0.6,0.843,0.05,3.1,NA,NA,2567,609,NA,NA,0,2016-07-14 01:00:00,2016-07-14,40,2
		1973,"Subject 3",7,"0103",2016-07-14 02:17:53,106.782,83.4276,0.5,0.781,0,3.1,NA,NA,1049,85,NA,NA,0,2016-07-14 02:00:00,2016-07-14,41,2
		1974,"Subject 3",7,"0103",2016-07-14 02:45:53,110.4228,86.2248,0.5,0.781,0.11,3.21,NA,NA,614,71,NA,NA,0,2016-07-14 02:00:00,2016-07-14,41,2
		1975,"Subject 3",7,"0103",2016-07-14 03:13:53,122.322,98.8344,0.6,0.808,0.09,3.3,NA,NA,1889,530,NA,NA,0,2016-07-14 03:00:00,2016-07-14,42,2
		1976,"Subject 3",7,"0103",2016-07-14 03:41:53,105.228,85.8696,0.5,0.816,0.04,3.34,NA,NA,2352,473,NA,NA,0,2016-07-14 03:00:00,2016-07-14,42,2
		1977,"Subject 3",7,"0103",2016-07-14 04:09:53,108.0696,84.7596,0.5,0.784,0,3.34,NA,NA,1578,24,NA,NA,0,2016-07-14 04:00:00,2016-07-14,43,2
		1978,"Subject 3",7,"0103",2016-07-14 04:37:53,130.9356,107.1372,0.6,0.818,0.16,3.5,NA,NA,2763,902,NA,NA,0,2016-07-14 04:00:00,2016-07-14,43,2
		1979,"Subject 3",7,"0103",2016-07-14 05:05:53,119.8356,101.1876,0.6,0.844,0.11,3.61,NA,NA,3494,1004,NA,NA,0,2016-07-14 05:00:00,2016-07-14,44,2
		1980,"Subject 3",7,"0103",2016-07-14 05:33:53,101.8536,80.8968,0.5,0.795,0,3.61,NA,NA,479,43,NA,NA,0,2016-07-14 05:00:00,2016-07-14,44,2
		1981,"Subject 3",7,"0103",2016-07-14 06:01:53,144.6552,119.1252,0.7,0.823,0.13,3.74,NA,NA,4861,2458,NA,NA,0,2016-07-14 06:00:00,2016-07-14,45,2
		1982,"Subject 3",7,"0103",2016-07-14 06:29:53,117.1272,96.8364,0.6,0.827,0.08,3.82,NA,NA,5553,2173,NA,NA,0,2016-07-14 06:00:00,2016-07-14,45,2
		1983,"Subject 3",7,"0103",2016-07-14 06:57:53,99.678,76.6344,0.5,0.769,0.01,3.83,NA,NA,1284,233,NA,NA,0,2016-07-14 06:00:00,2016-07-14,45,2
		1984,"Subject 3",7,"0103",2016-07-14 07:25:53,86.802,65.934,0.4,0.759,-0.01,3.82,NA,NA,795,9,NA,NA,0,2016-07-14 07:00:00,2016-07-14,46,2
		1985,"Subject 3",7,"0103",2016-07-14 07:53:53,122.7216,99.234,0.6,0.809,0.12,3.94,NA,NA,2133,566,NA,NA,0,2016-07-14 07:00:00,2016-07-14,46,2
		1986,"Subject 3",7,"0103",2016-07-14 08:21:53,115.884,99.1008,0.6,0.855,0.1,4.04,NA,NA,3761,1420,NA,NA,0,2016-07-14 08:00:00,2016-07-14,47,2
		1987,"Subject 3",7,"0103",2016-07-14 08:49:53,95.1936,75.0804,0.5,0.789,0,4.04,NA,NA,717,68,NA,NA,0,2016-07-14 08:00:00,2016-07-14,47,2
		1988,"Subject 3",7,"0103",2016-07-14 09:17:53,94.6608,74.3256,0.5,0.785,0,4.04,NA,NA,426,23,NA,NA,0,2016-07-14 09:00:00,2016-07-14,48,2
		1989,"Subject 3",7,"0103",2016-07-14 09:45:53,87.3348,70.0632,0.4,0.802,0.01,4.05,NA,NA,307,51,NA,NA,0,2016-07-14 09:00:00,2016-07-14,48,2
		1990,"Subject 3",7,"0103",2016-07-14 10:13:53,97.8132,78.5436,0.5,0.803,0,4.05,NA,NA,1137,87,NA,NA,0,2016-07-14 10:00:00,2016-07-14,49,2
		1991,"Subject 3",7,"0103",2016-07-14 10:41:53,84.36,64.5132,0.4,0.765,0,4.05,NA,NA,2173,475,NA,NA,0,2016-07-14 10:00:00,2016-07-14,49,2
		1992,"Subject 3",7,"0103",2016-07-14 11:09:53,88.356,69.3084,0.4,0.785,0.01,4.06,NA,NA,711,105,NA,NA,0,2016-07-14 11:00:00,2016-07-14,50,2
		1993,"Subject 3",7,"0103",2016-07-14 11:37:53,86.6244,66.9108,0.4,0.773,0.01,4.07,NA,NA,272,25,NA,NA,0,2016-07-14 11:00:00,2016-07-14,50,2
		1994,"Subject 3",7,"0103",2016-07-14 12:05:53,127.6056,104.6952,0.6,0.821,0.06,4.13,NA,NA,2635,888,NA,NA,0,2016-07-14 12:00:00,2016-07-14,51,2
		1995,"Subject 3",7,"0103",2016-07-14 12:33:53,91.3308,75.5688,0.4,0.828,0.07,4.2,NA,NA,938,185,NA,NA,0,2016-07-14 12:00:00,2016-07-14,51,2
		1996,"Subject 3",7,"0103",2016-07-14 13:01:53,94.7496,74.4588,0.5,0.786,0.01,4.21,NA,NA,786,57,NA,NA,0,2016-07-14 13:00:00,2016-07-14,52,2
		1997,"Subject 3",7,"0103",2016-07-14 13:29:53,108.6024,85.9584,0.5,0.791,0.01,4.22,NA,NA,1006,132,NA,NA,0,2016-07-14 13:00:00,2016-07-14,52,2
[truncated: 1,771 more rows]
