# Supplementary figures and images for: Restored TDCA and valine levels imitate the effects of bariatric surgery
Source: eLife journal article supplement (doi:10.7554/elife.62928), 2021-06-22

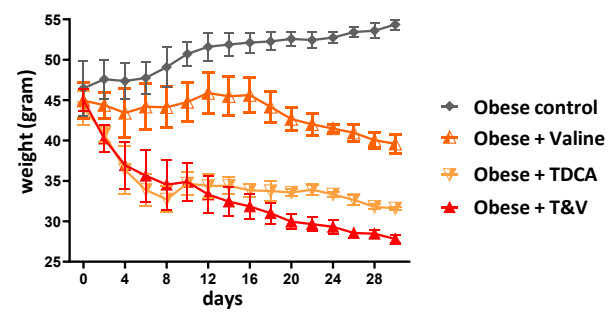

Supplement: supp [file elife-62928-supp-v1.zip]
